# Supplementary material for: Anionic Pulmonary Surfactant Lipid Treatment Inhibits Rhinovirus A Infection of the Human Airway Epithelium
Source: Viruses. 2023 Mar 14;15(3):747. doi: 10.3390/v15030747 (PMC10055697; doi:10.3390/v15030747)
Supplement: Supplementary file 1 [file viruses-15-00747-s001.zip › viruses-2188315 supplementary table.xlsx]

## Sheet: Table S1
Table S1: Primer sequences
Gene	Primer sequence (5'-3')
RV-A16	forward-TCTCTACAGGGCCCTTACTCG
	reverse-CAAGCACTTTGGTGTGTATTCC
MDA5	forward-GAAGTACAATGAGGCCCTACAA
	reverse-CATCACCACCCTCATCACTATC
IRF-7	forward-ACACACACATGCTGGACTC
	reverse-CTTGGTTGGGACTGGATCTG
IFN-lambda	forward-CTGCCACATAGCCCAGTTCA
	reverse-AGAAGCGCATCTTCTAAGGCATCTT
Beta-actin	forward-CTTCCTTCCGACCTTCCAC
	reverse-TGTAGGCGTTTCTGGACGT

## Sheet: Table S2
Table S2. Gene differential expression results for all comparisons performed.
Gene	Virus_vs_ctrl_LogFoldChange	Virus_vs_ctrl_p_val_adj	Virus_POPG_vs_Virus_LogFoldChange	Virus_POPG_vs_Virus_p_val_adj	Virus_PI_vs_Virus_LogFoldChange	Virus_PI_vs_Virus_p_val_adj	Virus_PC_vs_Virus_LogFoldChange	Virus_PC_vs_Virus_p_val_adj	Virus_POPG_vs_ctrl_LogFoldChange	Virus_POPG_vs_ctrl_p_val_adj	Virus_PI_vs_ctrl_LogFoldChange	Virus_PI_vs_ctrl_p_val_adj	Virus_PC_vs_ctrl_LogFoldChange	Virus_PC_vs_ctrl_p_val_adj
A1BG-AS1	-0.456928	0.002341	-0.105473	0.788402	-0.521249	0.000970184	-0.27337	0.355877	-0.562401	0.000225126	-0.978177	5.80317e-09	-0.730298	2.78519e-06
A2M-AS1	-0.406875	0.0388075	-0.213491	0.621901	0.290868	0.174461	0.0247125	0.9665	-0.620367	0.00178146	-0.116008	0.611392	-0.382163	0.0512967
A2ML1	0.268819	0.470756	0.356332	0.660394	0.40755	0.301836	1.39026	0.00561295	0.625151	0.0817539	0.676368	0.0708195	1.65908	6.49058e-06
A4GALT	0.20969	0.00221862	-0.220286	0.0232915	-0.0816619	0.2798	-0.0944262	0.522672	-0.0105959	0.89294	0.128028	0.0753886	0.115264	0.0914814
AAAS	-0.430171	6.84477e-08	0.159152	0.189968	0.405828	6.90517e-07	0.0771798	0.64414	-0.27102	0.000311541	-0.0243436	0.788785	-0.352992	4.21714e-06
AACS	0.0873472	0.200776	0.0371074	0.847268	0.0753734	0.313359	0.092784	0.522891	0.124455	0.066109	0.162721	0.0200078	0.180131	0.00700696
AADAC	0.377647	0.0476047	-0.0798892	0.893527	0.272709	0.189172	-0.279808	0.493274	0.297758	0.123639	0.650356	0.00101283	0.0978391	0.629569
AADACL2-AS1	-0.778094	9.77874e-05	-0.193259	0.668311	0.158054	0.481933	-0.137652	0.767199	-0.971353	2.31853e-06	-0.62004	0.0022659	-0.915746	6.15563e-06
AADACP1	-0.433289	0.00617074	-0.108297	0.79558	0.195037	0.26434	-0.321507	0.282867	-0.541586	0.000722457	-0.238252	0.1594	-0.754796	4.30099e-06
AAED1	-0.659268	3.07194e-09	-0.0794869	0.753272	-0.352941	0.000870962	-0.0965313	0.674822	-0.738755	1.25252e-10	-1.01221	3.56974e-15	-0.7558	4.64723e-11
AAGAB	0.249833	3.56723e-12	0.0370436	0.560431	-0.0409527	0.220137	0.0373554	0.578917	0.286877	2.9826e-14	0.208881	1.47018e-09	0.287189	2.00877e-14
AAK1	0.421377	2.43251e-06	-0.0966603	0.598112	-0.2121	0.0181443	0.115484	0.532762	0.324717	0.000189753	0.209277	0.0185002	0.536861	8.27481e-09
AAMDC	-0.00301244	0.982368	0.0140472	0.97496	-0.00204665	0.989446	0.21885	0.315291	0.0110348	0.932651	-0.0050591	0.972657	0.215837	0.0543818
AAMP	0.000390424	0.995852	0.00569868	0.979394	0.107418	0.0864559	0.043866	0.752733	0.00608911	0.928528	0.107809	0.081138	0.0442565	0.467387
AAR2	-0.0104157	0.866819	-0.0188958	0.915241	-0.117064	0.0438677	-0.00676318	0.966587	-0.0293115	0.619423	-0.12748	0.025932	-0.0171789	0.774801
AARS	0.497977	3.20129e-11	0.0833267	0.53097	-0.172807	0.0113103	0.0367267	0.818064	0.581304	1.9156e-13	0.32517	2.91909e-06	0.534704	2.50374e-12
AARS2	0.10089	0.13283	0.0249879	0.90727	0.0650657	0.386087	-0.0310577	0.853501	0.125877	0.0602266	0.165955	0.0163864	0.0698318	0.303615
AARSD1	-0.251614	0.0636186	0.313858	0.141719	0.366377	0.00999354	0.204064	0.475232	0.0622441	0.670887	0.114763	0.44853	-0.0475506	0.746309
AASDH	-0.16923	0.00742503	0.0744121	0.574576	0.0971717	0.156703	-0.063644	0.658089	-0.094818	0.140516	-0.0720584	0.297204	-0.232874	0.000262474
AASDHPPT	0.0314402	0.738247	-0.00524053	0.985612	0.00647683	0.955874	-0.117293	0.529056	0.0261997	0.783029	0.0379171	0.710497	-0.0858529	0.329446
AASS	-0.235019	0.120197	-0.295551	0.245126	-0.0515472	0.780578	-0.372609	0.141393	-0.530571	0.000486028	-0.286566	0.069411	-0.607628	6.80042e-05
AATBC	-0.0709794	0.504611	0.00327526	0.991474	-0.203126	0.0588982	-0.00496366	0.986542	-0.0677041	0.528882	-0.274105	0.00903251	-0.075943	0.47046
AATF	0.114675	0.0064019	-0.0275598	0.807512	-0.039154	0.411961	0.0410145	0.669719	0.0871148	0.0393873	0.0755206	0.0892655	0.155689	0.00024595
AATK	-0.223349	0.33359	-0.0095294	0.989675	0.155167	0.552931	0.0155718	0.981934	-0.232878	0.315109	-0.0681816	0.80457	-0.207777	0.366727
ABALON	0.0627196	0.719647	-0.127738	0.751198	-0.28594	0.0962164	-0.0853768	0.829036	-0.0650186	0.710216	-0.223221	0.19598	-0.0226571	0.898818
ABAT	1.22344	1.56757e-13	-0.375812	0.0629433	-1.14797	9.26645e-12	-0.181615	0.541743	0.847625	1.36575e-08	0.0754646	0.634524	1.04182	2.79445e-11
ABCA1	0.590899	0.0148046	-0.738904	0.0350049	-0.368615	0.161977	-0.753573	0.0411086	-0.148005	0.567633	0.222285	0.411011	-0.162674	0.522496
ABCA10	0.304343	0.0370759	0.302888	0.212386	0.181157	0.260957	0.160101	0.625968	0.607231	5.15853e-05	0.4855	0.00136294	0.464444	0.00146395
ABCA11P	0.110229	0.496746	-0.0602765	0.903444	0.0407206	0.83508	0.0105237	0.982461	0.0499529	0.76955	0.15095	0.377124	0.120753	0.451842
ABCA12	0.670194	0.000533763	-0.176199	0.698274	-0.304522	0.141387	-0.263756	0.523967	0.493995	0.0100988	0.365672	0.0695964	0.406438	0.0327496
ABCA13	-1.30085	1.44528e-09	0.112301	0.838202	0.978942	3.31065e-06	-0.238266	0.575771	-1.18855	1.72756e-08	-0.321908	0.115622	-1.53912	6.94419e-12
ABCA2	-0.785904	8.63888e-11	-0.0808125	0.766118	0.346016	0.00188838	0.0232831	0.938365	-0.866717	4.05068e-12	-0.439888	7.54708e-05	-0.762621	1.74666e-10
ABCA3	-0.83017	3.43081e-09	0.145593	0.588374	0.138682	0.327867	0.129338	0.654038	-0.684577	4.11097e-07	-0.691488	5.13366e-07	-0.700832	2.04662e-07
ABCA4	-1.23352	1.32393e-12	0.37713	0.0861462	1.27092	3.42494e-12	-0.027592	0.947719	-0.856387	5.89085e-08	0.0374036	0.835291	-1.26111	4.81507e-13
ABCA5	-0.851906	3.98449e-10	-0.0388892	0.92219	0.55631	1.91389e-05	-0.172863	0.502617	-0.890796	1.13166e-10	-0.295596	0.0185964	-1.02477	8.80816e-13
ABCA6	1.92422	4.70664e-08	0.45487	0.479811	-0.486167	0.169602	0.265907	0.724369	2.37909	1.55051e-10	1.43806	2.93512e-05	2.19013	1.34111e-09
ABCA7	0.0739843	0.320446	0.0272163	0.907206	0.180202	0.017867	0.0115812	0.955435	0.101201	0.170354	0.254186	0.000732366	0.0855655	0.243468
ABCA9	0.439575	0.0791133	0.241599	0.677229	-0.0931908	0.760495	0.0270818	0.970243	0.681174	0.00648614	0.346384	0.196646	0.466657	0.0603929
ABCB10	-0.155117	0.304171	0.0199816	0.97204	-0.0120614	0.951846	-0.164294	0.618454	-0.135136	0.376571	-0.167179	0.297549	-0.319411	0.0286199
ABCB11	-0.0843632	0.637164	0.0506871	0.927085	-0.171732	0.360766	-0.309014	0.347735	-0.0336761	0.859512	-0.256096	0.151895	-0.393377	0.017879
ABCB6	-0.583106	0.000189174	0.219311	0.467537	1.03307	5.69158e-09	0.282169	0.35102	-0.363794	0.0182754	0.449961	0.00474521	-0.300936	0.0492134
ABCB7	-0.0924109	0.0672387	0.0173315	0.915241	0.183183	0.000582287	0.0498066	0.663795	-0.0750794	0.14276	0.0907722	0.0877547	-0.0426043	0.412295
ABCB8	-0.192245	0.00837334	0.0125216	0.962676	0.137435	0.0776785	0.16941	0.184818	-0.179723	0.0140547	-0.05481	0.508177	-0.0228351	0.774867
ABCB9	0.335427	7.32809e-05	-0.0430878	0.858756	-0.031293	0.75809	0.196598	0.16699	0.292339	0.000495056	0.304134	0.000424693	0.532025	4.59896e-09
ABCC1	-0.153284	0.0361634	0.0218072	0.928219	0.502613	3.27955e-09	-0.0539324	0.756613	-0.131476	0.0750469	0.349329	7.33907e-06	-0.207216	0.00445186
ABCC10	-0.026479	0.637472	-0.0466996	0.713047	-0.103226	0.0649743	-0.0849234	0.433527	-0.0731787	0.172254	-0.129706	0.0176717	-0.111402	0.0329629
ABCC11	0.0660436	0.78971	-0.0414683	0.960737	-0.0894075	0.745078	0.209239	0.685333	0.0245753	0.924119	-0.0233639	0.935497	0.275282	0.224465
ABCC2	-0.398758	0.00379348	0.270608	0.246393	-0.0761989	0.642554	-0.0361645	0.926951	-0.128151	0.370701	-0.474957	0.000897351	-0.434923	0.00156522
ABCC3	0.744009	7.44854e-06	0.754535	0.000353614	1.43809	1.237e-12	0.81622	0.000127325	1.49854	3.66897e-14	2.18209	1.63806e-20	1.56023	5.59174e-15
ABCC4	-0.506279	6.50699e-05	0.0817561	0.805094	0.668402	9.85632e-07	-0.218341	0.380013	-0.424523	0.000712672	0.162123	0.22566	-0.72462	5.27508e-08
ABCC5	-1.05506	7.94719e-21	0.206428	0.0768088	0.898904	2.50067e-16	-0.121872	0.454727	-0.848628	1.11175e-16	-0.156153	0.0560147	-1.17693	4.0107e-23
ABCC6	-0.47077	0.00330793	-0.21345	0.507438	-0.743585	1.67676e-05	-0.117147	0.757577	-0.68422	3.34302e-05	-1.21435	7.26458e-11	-0.587917	0.000269378
ABCC6P1	-0.543221	0.00291308	-0.290049	0.394594	-0.702166	0.000281934	-0.344433	0.332374	-0.833269	1.06819e-05	-1.24539	1.6354e-09	-0.887654	2.83857e-06
ABCC6P2	-1.11823	7.02218e-07	0.0244074	0.97496	-0.372747	0.102998	-0.0111132	0.98634	-1.09382	1.17805e-06	-1.49098	8.45521e-10	-1.12934	5.07966e-07
ABCC9	-0.364297	0.146184	0.0248867	0.979157	0.993946	0.000167887	-0.172625	0.770243	-0.33941	0.180239	0.629649	0.0145748	-0.536922	0.0294313
ABCD2	0.116199	0.624393	-0.364714	0.374239	-0.876572	0.00020714	-0.212648	0.676218	-0.248514	0.27811	-0.760372	0.000990917	-0.0964486	0.686379
ABCD3	-0.542085	2.57514e-07	0.115493	0.577174	0.530189	1.06575e-06	-0.0584031	0.808455	-0.426592	2.79594e-05	-0.0118962	0.924906	-0.600488	1.94575e-08
ABCD4	-0.42352	7.77027e-11	-0.0258576	0.882926	0.0794699	0.200424	-0.0915304	0.435385	-0.449378	1.28186e-11	-0.34405	4.18193e-08	-0.51505	8.62957e-14
ABCE1	-0.397665	0.0122966	0.225597	0.471426	0.440276	0.00841974	-0.0913471	0.815788	-0.172068	0.294732	0.0426108	0.827951	-0.489012	0.00206592
ABCF1	0.140553	0.00848237	0.0145613	0.935828	0.0819769	0.157333	0.0254481	0.84972	0.155115	0.00386587	0.22253	7.41356e-05	0.166002	0.00186435
ABCF2	-0.0235427	0.588704	0.0834196	0.226975	0.0854707	0.0494112	0.0341822	0.719248	0.059877	0.151778	0.061928	0.158098	0.0106395	0.813766
ABCF3	0.207348	7.68665e-07	0.00869158	0.95212	-0.014684	0.763196	0.0456462	0.605002	0.21604	3.35594e-07	0.192664	5.33478e-06	0.252994	5.78144e-09
ABCG1	-0.254872	0.128692	-1.28125	5.28084e-09	-0.325459	0.0658977	-1.25026	9.93321e-09	-1.53612	6.17255e-14	-0.580331	0.00078916	-1.50513	9.13435e-14
ABCG2	0.153369	0.414669	0.376588	0.209839	0.228408	0.250897	0.0764723	0.870235	0.529957	0.00350365	0.381777	0.0434418	0.229841	0.208032
ABHD10	-0.397833	1.15058e-06	0.0920649	0.571319	0.311604	0.000164051	0.0127472	0.954137	-0.305768	0.000116901	-0.0862295	0.310161	-0.385086	2.00962e-06
ABHD11	0.162261	0.0650117	-0.0766366	0.718368	-0.127697	0.181348	0.102199	0.598288	0.085624	0.34677	0.0345634	0.742696	0.26446	0.00250098
ABHD11-AS1	-0.49239	0.0104278	-0.122819	0.815043	-0.688941	0.000707079	0.0733523	0.887825	-0.615209	0.00153434	-1.18133	3.02263e-08	-0.419038	0.0284913
ABHD12	0.236892	0.000349682	-0.0727963	0.608873	-0.0789292	0.275046	0.034518	0.831023	0.164096	0.0123539	0.157963	0.0204287	0.271411	4.72372e-05
ABHD12B	-1.75295	1.78164e-14	-0.191262	0.643734	0.102116	0.641401	-0.25023	0.530527	-1.94421	3.63211e-16	-1.65083	2.50632e-13	-2.00318	7.10175e-17
ABHD13	0.158242	0.150338	-0.0109415	0.979157	-0.0938659	0.450284	-0.113691	0.643792	0.147301	0.185111	0.0643761	0.609572	0.044551	0.703983
ABHD14A	-0.786638	7.99265e-07	0.0978648	0.810642	0.0510148	0.784348	0.124589	0.722005	-0.688774	1.10278e-05	-0.735624	4.88514e-06	-0.66205	1.88526e-05
ABHD14B	-0.69139	1.72023e-10	0.0647674	0.79592	0.334223	0.000879566	-0.0130218	0.962263	-0.626623	3.05413e-09	-0.357168	0.000323886	-0.704412	7.854e-11
ABHD15	-0.0779949	0.299376	-0.0926069	0.538144	-0.0170023	0.855454	-0.0845699	0.602314	-0.170602	0.0200603	-0.0949973	0.229404	-0.162565	0.025313
ABHD16A	0.453627	8.31566e-07	0.0593683	0.79592	-0.319986	0.000521995	-0.0284277	0.907027	0.512995	5.46922e-08	0.133641	0.151303	0.425199	2.77396e-06
ABHD16B	-0.0748798	0.783588	-0.00127701	0.998961	0.132721	0.653246	-0.0758606	0.91343	-0.0761568	0.780666	0.057841	0.850566	-0.15074	0.563084
ABHD17A	0.0307294	0.737923	-0.0660279	0.756457	0.122711	0.179538	0.0456155	0.824445	-0.0352985	0.699495	0.15344	0.0832917	0.0763448	0.376495
ABHD17AP6	0.265692	0.232753	-0.0622675	0.930644	-0.0826991	0.757582	-0.279864	0.560033	0.203424	0.370243	0.182993	0.454017	-0.0141722	0.953538
ABHD17B	0.230256	0.0081385	0.050474	0.839418	-0.132044	0.162418	0.0524359	0.805454	0.28073	0.00140013	0.0982119	0.302361	0.282691	0.00117902
ABHD17C	0.0535778	0.303287	0.235815	0.00042467	0.302797	1.02225e-07	0.179852	0.0144642	0.289393	1.11039e-07	0.356375	7.12749e-10	0.23343	8.0245e-06
ABHD18	0.283101	4.64924e-06	0.0740084	0.545448	-0.167573	0.00713938	0.0418868	0.766217	0.35711	3.14445e-08	0.115529	0.0639713	0.324988	2.41758e-07
ABHD2	-1.17805	1.65315e-15	0.0752336	0.811025	0.571726	5.87111e-06	-0.181917	0.454478	-1.10281	2.23322e-14	-0.60632	1.25515e-06	-1.35996	3.50423e-18
ABHD3	0.306326	1.13471e-06	0.0549476	0.698553	-0.0224746	0.759367	0.0568229	0.678734	0.361274	2.82531e-08	0.283851	7.98638e-06	0.363149	2.00022e-08
ABHD4	-0.0981464	0.203747	0.0588057	0.76194	0.401003	1.53099e-06	0.0377856	0.840764	-0.0393407	0.630334	0.302856	0.00014149	-0.0603607	0.443803
ABHD5	-0.0808162	0.257245	0.27423	0.00373465	0.399667	2.71774e-07	0.201076	0.0669178	0.193414	0.0057369	0.318851	1.61487e-05	0.120259	0.0844659
ABHD6	0.132538	0.642869	-0.135693	0.864119	-0.463399	0.106159	-0.0136607	0.98649	-0.0031546	0.991434	-0.330861	0.25348	0.118877	0.678902
ABHD8	-0.450582	0.00074006	0.0772072	0.838029	0.270179	0.0545167	0.0158165	0.967372	-0.373375	0.0049677	-0.180403	0.205854	-0.434766	0.00103991
ABI1	0.133712	0.081284	-0.100409	0.515685	-0.232354	0.00378241	-0.0729103	0.67711	0.0333028	0.68819	-0.0986429	0.232298	0.0608012	0.442951
ABI2	-0.686109	2.46232e-11	0.0145787	0.964201	0.194382	0.0381752	-0.12419	0.515445	-0.67153	5.26158e-11	-0.491727	3.49766e-07	-0.810299	6.67838e-14
ABI3BP	-1.26724	3.7697e-11	-0.166458	0.66013	-0.211979	0.246418	-0.363166	0.227716	-1.4337	6.88855e-13	-1.47922	3.36398e-13	-1.63041	4.45445e-15
ABL1	0.257458	1.72987e-05	-0.0573296	0.667974	-0.163418	0.00736283	-0.161613	0.0828192	0.200129	0.00066161	0.09404	0.128038	0.0958454	0.0988417
ABL2	0.588917	0.000424358	-0.355581	0.189779	-0.480398	0.00561524	-0.0177122	0.970583	0.233336	0.165819	0.108519	0.567046	0.571205	0.000573262
ABLIM1	-0.831048	9.06505e-14	0.049485	0.850205	0.663729	6.50094e-10	-0.052285	0.815805	-0.781563	8.61109e-13	-0.167319	0.0817719	-0.883333	7.20091e-15
ABLIM2	0.126613	0.547847	0.0728822	0.910317	-0.0167257	0.950918	0.232448	0.598407	0.199495	0.334738	0.109887	0.636688	0.359061	0.0713744
ABLIM3	0.335929	0.00648637	0.0662886	0.852708	0.0332658	0.831223	0.188158	0.466792	0.402218	0.00125197	0.369195	0.00392278	0.524087	3.28202e-05
ABO	-0.410711	8.4012e-06	-0.00669793	0.9835	0.420037	1.24065e-05	-0.0494873	0.821789	-0.417409	6.59322e-06	0.00932584	0.935061	-0.460199	8.32552e-07
ABR	0.17344	0.0117394	-0.22482	0.0213005	-0.265646	0.000281806	-0.153341	0.215632	-0.0513803	0.479562	-0.0922067	0.214726	0.0200991	0.79068
ABRACL	0.332639	1.6386e-06	-0.0404651	0.825447	-0.111797	0.115713	-0.0431017	0.785642	0.292174	1.9158e-05	0.220842	0.00128843	0.289537	1.93117e-05
ABRAXAS1	-0.319954	0.00807027	-0.0419102	0.914948	-0.158437	0.232969	-0.0565002	0.853501	-0.361864	0.00291914	-0.478391	0.000156908	-0.376454	0.00181438
ABRAXAS2	0.210611	0.000279981	-0.0289361	0.86481	-0.148267	0.0136368	-0.0261575	0.85638	0.181674	0.00162866	0.0623435	0.319576	0.184453	0.00126187
ABT1	0.0553689	0.336833	-0.0642764	0.586902	-0.0470856	0.461324	0.0148325	0.926358	-0.00890753	0.890094	0.00828324	0.906212	0.0702014	0.214347
ABTB1	-0.426044	1.18978e-05	-0.0996944	0.633632	0.271859	0.00589382	-0.00177856	0.994052	-0.525738	1.82719e-07	-0.154184	0.122829	-0.427822	1.00722e-05
ABTB2	0.482372	0.000899922	-0.737711	8.97639e-05	-1.36512	2.43748e-13	-0.336687	0.179554	-0.255339	0.0794095	-0.882746	3.20855e-08	0.145685	0.323166
ACAA1	0.619066	8.25501e-12	0.0111088	0.970031	-0.139849	0.091216	0.251437	0.0297724	0.630175	4.91718e-12	0.479218	2.38785e-08	0.870504	1.88047e-17
ACAA2	-0.514205	1.15466e-08	0.64039	4.27619e-09	0.543097	9.18503e-09	0.809438	2.28496e-12	0.126184	0.131484	0.0288916	0.773343	0.295233	0.000366927
ACACA	-0.563384	3.18887e-06	0.257383	0.168393	0.545214	1.31151e-05	0.0340876	0.917989	-0.306001	0.00838687	-0.0181702	0.901308	-0.529297	9.23305e-06
ACACB	-0.214512	0.0578116	-0.156951	0.481769	-0.0936614	0.468371	-0.182256	0.434026	-0.371463	0.00111708	-0.308173	0.00846714	-0.396768	0.000470239
ACAD10	-0.77936	1.07018e-13	0.0428053	0.867111	0.303102	0.000829779	-0.0266664	0.912272	-0.736555	8.53189e-13	-0.476258	3.43802e-07	-0.806026	2.42455e-14
ACAD11	-0.487691	0.0058257	0.0252246	0.970225	-0.323672	0.0870805	-0.149253	0.716347	-0.462467	0.0091654	-0.811364	1.5206e-05	-0.636944	0.000350638
ACAD8	0.322421	0.000334219	0.113672	0.531501	0.184435	0.0498949	-0.212824	0.160437	0.436093	2.7914e-06	0.506857	1.74862e-07	0.109598	0.222129
ACAD9	-0.0102515	0.858875	0.0886519	0.334159	0.169454	0.00162523	0.114552	0.20981	0.0784004	0.130771	0.159203	0.00263677	0.1043	0.0399998
ACADL	-1.04888	6.66592e-07	-0.152726	0.765786	0.0564123	0.822036	-0.221206	0.621787	-1.20161	3.08885e-08	-0.992472	3.29793e-06	-1.27009	5.90618e-09
ACADM	-0.448924	0.000131841	0.118951	0.648914	0.486045	8.13799e-05	-0.0518338	0.85939	-0.329973	0.00438785	0.0371211	0.793464	-0.500757	2.24507e-05
ACADS	-0.237501	0.00759796	0.190636	0.192613	0.329776	0.000468835	0.226604	0.128781	-0.0468643	0.62456	0.0922755	0.346445	-0.0108963	0.912373
ACADSB	-0.55395	7.04557e-07	0.00465001	0.989251	0.56496	1.15829e-06	-0.136448	0.555102	-0.5493	8.93264e-07	0.0110099	0.935497	-0.690398	2.92406e-09
ACADVL	0.00794188	0.92466	0.542969	1.9218e-08	0.569242	1.20738e-10	0.6488	6.91204e-11	0.550911	7.51356e-11	0.577184	2.60015e-11	0.656742	1.58442e-13
ACAP1	-1.08911	8.89849e-07	-0.0287693	0.971915	-0.326238	0.151462	0.143941	0.77461	-1.11788	5.41855e-07	-1.41535	2.42415e-09	-0.94517	1.21772e-05
ACAP2	0.190714	0.237271	0.0183822	0.97496	-0.124937	0.491719	-0.116677	0.756308	0.209096	0.195533	0.0657769	0.728506	0.0740367	0.662313
ACAP3	-0.166927	0.0339215	-0.0846152	0.626171	0.0102732	0.922217	-0.037708	0.84874	-0.251542	0.00154606	-0.156653	0.0581871	-0.204635	0.00895339
ACAT1	-1.00829	1.7852e-17	0.106222	0.567306	0.325214	0.000537308	-0.000349926	0.999216	-0.902072	1.73259e-15	-0.68308	4.75408e-11	-1.00864	1.26747e-17
ACAT2	0.116724	0.537657	0.502986	0.0580689	0.232942	0.238452	0.65818	0.0111516	0.61971	0.000657755	0.349665	0.0641819	0.774904	2.51614e-05
ACBD3	0.577501	1.58679e-06	0.063114	0.848102	-0.140935	0.264824	-0.0592731	0.834367	0.640615	1.81743e-07	0.436566	0.000263183	0.518228	1.11166e-05
ACBD3-AS1	-1.42755	2.22663e-11	-0.23158	0.54096	-0.798573	5.1976e-05	-0.293156	0.442807	-1.65913	1.47987e-13	-2.22612	2.72325e-18	-1.7207	2.79685e-14
ACBD4	-0.0964469	0.313391	-0.147513	0.397384	0.167901	0.0916592	-0.177839	0.324951	-0.24396	0.00891695	0.0714537	0.497047	-0.274286	0.00307936
ACBD5	0.12364	0.231673	0.011927	0.97496	-0.005902	0.965808	-0.107206	0.639855	0.135567	0.190377	0.117738	0.286957	0.0164339	0.883618
ACBD6	-0.425496	1.52068e-08	0.0913267	0.510601	0.390224	3.42565e-07	0.122798	0.371819	-0.334169	3.51549e-06	-0.0352723	0.663498	-0.302698	1.81863e-05
ACBD7	-1.36382	8.90639e-10	0.256282	0.528738	0.56421	0.00684932	0.0155668	0.979783	-1.10753	1.95692e-07	-0.799605	0.00012299	-1.34825	1.02922e-09
ACCS	-0.328531	8.42941e-05	0.0286604	0.914229	0.197303	0.0219747	-0.113936	0.517316	-0.299871	0.000311198	-0.131228	0.13244	-0.442467	3.25698e-07
ACD	-0.165728	0.0515227	-0.116088	0.492566	0.0423591	0.676795	-0.0116361	0.962263	-0.281816	0.00103048	-0.123369	0.175654	-0.177364	0.0358581
ACE	0.492019	0.00705666	-0.130305	0.785559	0.126425	0.552931	0.0326984	0.950021	0.361714	0.0490481	0.618444	0.00112021	0.524717	0.00392986
ACE2	1.96744	2.49522e-20	-0.122612	0.739751	-0.865682	1.97566e-07	0.0839678	0.818445	1.84483	5.24367e-19	1.10176	1.59798e-10	2.05141	2.94255e-21
ACER2	-0.191099	0.365353	0.304808	0.437082	0.271196	0.225716	0.00721231	0.989827	0.113709	0.602917	0.0800974	0.743386	-0.183887	0.380583
ACER3	-0.0191816	0.824684	0.0251446	0.921684	0.301129	0.00024351	-0.0754066	0.669504	0.00596304	0.946687	0.281947	0.000464042	-0.0945882	0.226373
ACHE	2.66847	5.30048e-16	-0.169062	0.804659	-0.953553	0.00042605	-0.108569	0.869955	2.49941	7.47226e-15	1.71492	2.75495e-09	2.5599	2.04201e-15
ACIN1	0.110709	0.0212869	-0.0461879	0.681937	-0.00943761	0.880047	0.0102129	0.940758	0.0645211	0.189577	0.101271	0.0445501	0.120922	0.011477
ACKR2	0.317546	0.0396037	0.302127	0.250025	0.30137	0.0666097	0.532187	0.0189945	0.619673	8.80711e-05	0.618916	0.0001301	0.849733	2.17191e-07
ACKR3	0.237706	0.0315365	0.0131015	0.97496	0.199084	0.0927477	-0.107218	0.672306	0.250808	0.0238456	0.43679	0.000162234	0.130488	0.244885
ACKR4	1.44685	1.10619e-07	-0.278131	0.61676	-2.13988	9.26645e-12	0.191708	0.750054	1.16872	9.52689e-06	-0.693026	0.00849318	1.63856	4.13872e-09
ACLY	-0.000777915	0.992873	0.0851188	0.568524	-0.0866619	0.27202	0.0661923	0.689249	0.0843409	0.250683	-0.0874398	0.259719	0.0654144	0.372622
ACO1	-2.1274	4.86194e-25	0.446857	0.0117978	1.02346	4.53608e-11	0.141348	0.624149	-1.68054	4.06416e-20	-1.10393	1.06493e-12	-1.98605	1.16838e-23
ACO2	-0.157293	0.000847654	0.102838	0.17506	0.12728	0.00959937	0.0217026	0.854384	-0.0544555	0.257712	-0.0300127	0.576981	-0.135591	0.00360715
ACOT1	0.213632	0.299509	0.220802	0.61417	-0.176638	0.439411	0.213083	0.638374	0.434434	0.0308265	0.0369943	0.884094	0.426715	0.0322056
ACOT11	-0.00779982	0.944046	0.384806	0.00315336	0.141355	0.178731	0.460311	0.000399742	0.377006	0.000132	0.133555	0.198725	0.452511	5.94504e-06
ACOT13	-0.0914062	0.318718	0.193332	0.183489	0.246463	0.00843349	0.0959741	0.632677	0.101926	0.266486	0.155057	0.0998378	0.00456784	0.964099
ACOT2	0.409562	1.76242e-05	-9.65993e-05	0.999838	-0.262524	0.00686479	0.0939729	0.654838	0.409465	1.86654e-05	0.147038	0.135732	0.503534	2.77112e-07
ACOT4	0.402155	0.0291912	0.228584	0.550489	-0.0807923	0.719394	0.207309	0.617244	0.630739	0.000732534	0.321362	0.0998133	0.609463	0.000977687
ACOT7	0.770594	3.80733e-09	-0.0247673	0.953727	-0.460517	0.00024749	0.306616	0.117117	0.745827	9.79422e-09	0.310078	0.0115606	1.07721	7.43751e-14
ACOT8	-0.243198	0.00662216	-0.0659553	0.776325	-0.0153645	0.896214	0.0323924	0.89648	-0.309153	0.000656914	-0.258563	0.00536693	-0.210806	0.017856
ACOT9	0.371694	1.49181e-08	-0.0616686	0.65058	-0.360365	9.49408e-08	-0.0019032	0.990697	0.310025	1.05659e-06	0.0113293	0.881213	0.369791	1.44934e-08
ACOX1	-0.214037	0.00401918	0.158289	0.197112	0.234428	0.0027129	0.0738271	0.661978	-0.0557477	0.476927	0.020391	0.824115	-0.14021	0.0583803
ACOX2	0.792122	0.000603706	0.0431573	0.960013	-0.0898497	0.749402	0.459992	0.289281	0.83528	0.000325098	0.702273	0.00307075	1.25211	2.46397e-07
ACOX3	-0.0282797	0.694019	-0.0882703	0.508525	0.112768	0.113704	0.00430774	0.98299	-0.11655	0.0816072	0.084488	0.239019	-0.023972	0.738837
ACOXL	0.422324	0.0234562	0.138091	0.774842	-0.283741	0.161388	0.304823	0.428678	0.560414	0.00283863	0.138583	0.513134	0.727146	0.000120727
ACOXL-AS1	-0.810322	0.000679726	0.0229578	0.979394	0.417406	0.0994151	-0.0881761	0.89082	-0.787364	0.000977403	-0.392916	0.117325	-0.898498	0.00017038
ACP1	-0.123843	0.0195221	0.00950419	0.962166	0.147209	0.00830943	0.0100957	0.947661	-0.114339	0.0319608	0.023366	0.710996	-0.113748	0.0311214
ACP2	1.39973	1.8233e-20	-0.07152	0.796121	-0.757746	8.91809e-10	0.0622498	0.808455	1.32821	2.28043e-19	0.641985	3.48572e-08	1.46198	1.9698e-21
ACP5	1.03905	7.82727e-11	0.0350222	0.942906	-0.290825	0.0490035	0.133954	0.674887	1.07407	2.98987e-11	0.748225	7.00451e-07	1.173	1.20149e-12
ACP6	-0.603095	5.70415e-07	0.065264	0.840939	0.602581	1.44639e-06	-0.134913	0.59405	-0.537831	5.91979e-06	-0.000513466	0.997233	-0.738008	3.67098e-09
ACP7	0.614311	0.00147358	0.583392	0.0355976	0.337004	0.102183	0.713778	0.00968256	1.1977	1.32665e-08	0.951316	3.68577e-06	1.32809	6.24155e-10
ACPP	-0.288847	0.0141351	0.321595	0.0660472	0.798196	4.63262e-09	0.243174	0.271431	0.0327479	0.802749	0.509349	4.16815e-05	-0.0456731	0.719574
ACSBG1	-1.39999	9.43595e-16	-0.11257	0.73728	-0.479868	0.000833418	-0.133549	0.66693	-1.51256	4.834e-17	-1.87986	9.29759e-21	-1.53354	1.71904e-17
ACSF2	-0.394072	1.01382e-06	0.0683791	0.711506	0.609553	4.90421e-11	0.0215612	0.920663	-0.325693	3.52985e-05	0.215482	0.00656122	-0.37251	2.83318e-06
ACSL1	1.50841	8.22449e-17	0.239585	0.333815	-0.398965	0.0058707	0.553421	0.00414659	1.748	1.88432e-19	1.10945	1.09507e-11	2.06183	6.62853e-23
ACSL3	0.436019	2.51009e-07	0.15123	0.267353	0.123236	0.15135	0.102123	0.555877	0.587249	1.01759e-10	0.559255	6.66742e-10	0.538142	1.03052e-09
ACSL4	0.339987	0.0523101	-0.159559	0.70153	-0.216483	0.262098	-0.300225	0.395513	0.180427	0.318822	0.123504	0.536525	0.0397622	0.836917
ACSL5	1.19587	3.16224e-14	0.0978847	0.765509	-0.393607	0.00328437	0.130305	0.652693	1.29376	1.73512e-15	0.802265	1.54665e-08	1.32618	4.42961e-16
ACSM1	0.141942	0.449039	-0.0858555	0.875761	-0.506627	0.00713938	0.0729162	0.876082	0.0560862	0.777049	-0.364685	0.0524107	0.214858	0.237036
ACSM3	0.288478	0.0952461	0.132592	0.764074	-0.366751	0.0439108	0.267079	0.459513	0.42107	0.0146219	-0.078273	0.700898	0.555557	0.00124287
ACSS1	-0.724422	2.13898e-09	-0.113377	0.643245	0.048242	0.715384	-0.191908	0.380013	-0.837799	3.13297e-11	-0.67618	2.23997e-08	-0.91633	1.2025e-12
ACSS2	0.312	0.000130986	0.183448	0.149345	0.153545	0.0721087	0.325363	0.00364287	0.495447	1.59557e-08	0.465544	1.15698e-07	0.637362	7.7868e-12
ACSS3	-1.21443	2.84814e-08	0.356776	0.319941	0.632988	0.00279883	0.103247	0.835392	-0.857653	3.56786e-05	-0.581441	0.00534538	-1.11118	2.0762e-07
ACTA1	-0.544908	0.0850764	-0.32198	0.652709	-0.409766	0.23675	-0.531522	0.407141	-0.866889	0.00609804	-0.954674	0.00346876	-1.07643	0.000660858
ACTA2	0.121345	0.441499	-0.159808	0.634296	-0.741489	6.15163e-06	-0.168896	0.618454	-0.0384637	0.819191	-0.620144	9.11448e-05	-0.047551	0.773337
ACTB	0.327801	4.7775e-05	-0.139371	0.31976	-0.367306	1.52971e-05	0.0416104	0.830519	0.18843	0.0168832	-0.0395052	0.669819	0.369411	5.69025e-06
ACTBL2	0.951557	1.80498e-05	-0.331853	0.416448	-1.10859	2.46689e-06	-0.267371	0.572582	0.619704	0.0041275	-0.157036	0.520745	0.684186	0.00146395
ACTG1	0.20741	0.0114184	-0.0202885	0.944307	-0.0891666	0.330866	0.0340281	0.87355	0.187121	0.023083	0.118243	0.179409	0.241438	0.00316198
ACTG1P1	-0.768647	0.000364515	0.280475	0.514688	0.107483	0.673405	-0.055568	0.927541	-0.488172	0.0223091	-0.661164	0.00276222	-0.824215	0.000132839
ACTG1P17	-0.777434	0.000359838	0.326503	0.427985	0.31063	0.185226	0.0672584	0.911596	-0.450931	0.0369448	-0.466803	0.0380766	-0.710175	0.000982457
ACTL10	0.614356	1.98802e-05	0.105972	0.768066	-0.168865	0.273795	0.213129	0.466264	0.720328	1.06321e-06	0.445491	0.00210494	0.827485	3.78615e-08
ACTL6A	-0.273623	5.20433e-08	0.0174266	0.907821	0.181784	0.000234573	-0.0135466	0.918529	-0.256197	2.57298e-07	-0.0918392	0.0601598	-0.28717	1.33518e-08
ACTN1	0.0205211	0.861596	-0.344407	0.0190786	-0.525327	3.68897e-06	-0.1151	0.623108	-0.323886	0.00201148	-0.504806	5.40376e-06	-0.0945794	0.376681
ACTN4	0.148704	0.000903643	-0.0856446	0.261228	-0.149143	0.00146133	0.0633904	0.504411	0.0630599	0.16431	-0.000438688	0.993669	0.212095	4.2791e-06
ACTR10	-0.0862824	0.0339393	0.111311	0.0657836	0.0985206	0.0215161	0.128797	0.0361612	0.0250286	0.564228	0.0122381	0.807356	0.0425146	0.306712
ACTR1A	-0.0596416	0.199982	-0.0582019	0.535947	0.042698	0.411078	0.0244861	0.82747	-0.117844	0.0102645	-0.0169436	0.75978	-0.0351555	0.45964
ACTR1B	-0.617595	2.41822e-11	0.102641	0.529882	0.299523	0.000397586	0.0165198	0.942315	-0.514954	5.34187e-09	-0.318072	0.000142428	-0.601075	4.58817e-11
ACTR2	-0.0211669	0.891174	0.0143818	0.977641	0.0209927	0.907962	-0.0626695	0.856066	-0.00678507	0.965689	-0.000174176	0.999356	-0.0838364	0.559171
ACTR3	0.209987	0.0117392	-0.0338755	0.898481	-0.160389	0.0712283	-0.0262577	0.911043	0.176112	0.0355974	0.0495988	0.607761	0.18373	0.026664
ACTR3B	-0.920131	1.34073e-13	0.228466	0.163514	0.58291	2.86085e-07	-0.0630756	0.798298	-0.691665	1.33663e-09	-0.337221	0.00144914	-0.983206	8.91351e-15
ACTR3C	-0.168045	0.0829407	-0.0523157	0.850508	0.111204	0.299028	0.0748082	0.739928	-0.220361	0.0228375	-0.0568405	0.611392	-0.0932368	0.345893
ACTR5	-0.307923	0.000712562	0.134971	0.43647	0.248031	0.00884564	0.16261	0.362341	-0.172952	0.0568237	-0.0598915	0.562733	-0.145313	0.107502
ACTR6	-0.18059	0.0699429	0.0986174	0.664358	0.105443	0.343383	0.0134655	0.9628	-0.0819726	0.430872	-0.0751467	0.504819	-0.167125	0.0923757
ACTR8	0.0334556	0.543954	0.0146076	0.933516	-0.034484	0.572311	0.0080437	0.958004	0.0480631	0.376571	-0.00102847	0.98833	0.0414993	0.443818
ACTRT3	0.121201	0.246525	-0.122982	0.565504	-0.0898313	0.441336	0.0118712	0.968295	-0.00178123	0.987728	0.0313697	0.803444	0.133072	0.197935
ACVR1	-0.183268	0.00082141	-0.0502658	0.697638	0.0175386	0.795572	-0.13419	0.144937	-0.233534	3.08549e-05	-0.165729	0.00327299	-0.317458	5.40296e-08
ACVR1B	0.200027	5.84684e-05	-0.0842286	0.334972	-0.150148	0.00330011	-0.0750139	0.462011	0.115798	0.0175309	0.0498787	0.351477	0.125013	0.00966931
ACVR1C	0.249491	0.319388	-0.0442709	0.961353	-0.404134	0.123362	0.262297	0.632708	0.20522	0.420027	-0.154643	0.581046	0.511788	0.0345098
ACVR2A	0.353502	2.46013e-05	0.0820075	0.658242	0.0329073	0.741935	0.0441556	0.824732	0.435509	4.86015e-07	0.386409	8.073e-06	0.397657	2.69341e-06
ACVR2B	-0.311272	0.00302405	0.0121009	0.97496	0.206936	0.0634505	-0.197876	0.333295	-0.299171	0.00447644	-0.104336	0.367435	-0.509148	3.00517e-06
ACVR2B-AS1	-0.10146	0.570962	-0.148188	0.716906	-0.0329984	0.880636	-0.159549	0.682794	-0.249648	0.146956	-0.134458	0.480561	-0.261009	0.123403
ACVRL1	0.568585	0.00558128	-0.0806932	0.902086	-1.13822	5.50003e-07	-0.0886428	0.865997	0.487892	0.0177499	-0.569631	0.00743517	0.479943	0.0185426
ACY1	-0.322535	0.00426189	0.366294	0.0218266	0.384085	0.00123824	0.0372214	0.905558	0.0437588	0.722388	0.0615502	0.639962	-0.285314	0.0109076
ACY3	0.495184	0.0143055	-0.205708	0.654817	-0.10689	0.658749	-0.0339191	0.952771	0.289476	0.16066	0.388294	0.0683027	0.461265	0.0218109
ACYP1	-0.955423	1.7722e-10	-0.0327898	0.94374	0.0589472	0.711916	-0.132488	0.658089	-0.988213	6.7605e-11	-0.896476	1.82564e-09	-1.08791	2.22056e-12
ACYP2	-0.289857	0.000298416	0.0494336	0.820365	-0.00913102	0.931899	0.0250054	0.911043	-0.240424	0.00252414	-0.298988	0.000293944	-0.264852	0.000832219
ADA	-0.292169	0.0482008	-0.196545	0.509167	0.0355449	0.849974	-0.267257	0.361434	-0.488715	0.00105847	-0.256625	0.100649	-0.559426	0.00017989
ADA2	-1.06109	7.86854e-08	0.0831858	0.883245	-0.350223	0.0734459	0.0595026	0.908046	-0.977908	5.3289e-07	-1.41132	4.77859e-11	-1.00159	2.64442e-07
ADAL	-0.190309	0.0177528	0.074058	0.698042	0.332086	0.000108718	0.00824806	0.972352	-0.116251	0.155706	0.141776	0.0952289	-0.182061	0.0226111
ADAM10	0.255785	0.0324978	-0.00725806	0.985612	-0.0178412	0.911149	-0.0148367	0.9665	0.248527	0.038829	0.237944	0.0583799	0.240949	0.0431654
ADAM12	-0.165515	0.413161	-0.728957	0.00629952	-1.07566	5.74319e-07	-0.783553	0.00399895	-0.894472	9.5772e-06	-1.24117	1.07415e-08	-0.949068	2.72526e-06
ADAM15	0.934271	2.63825e-24	0.0511161	0.716323	-0.0914656	0.146217	0.15679	0.0979786	0.985387	2.19929e-25	0.842805	1.25199e-21	1.09106	8.75986e-28
ADAM17	0.6514	1.59656e-13	-0.0884511	0.559646	-0.396198	7.66361e-07	-0.00871663	0.967372	0.562949	2.42349e-11	0.255202	0.000725151	0.642683	2.02939e-13
ADAM19	0.210499	0.389446	-1.01238	0.00128193	-1.27286	9.57738e-07	-0.654217	0.0841894	-0.801877	0.000768674	-1.06236	2.05289e-05	-0.443718	0.0587467
ADAM22	-0.998216	3.20282e-07	-0.327269	0.315523	0.28835	0.14651	-0.163903	0.700716	-1.32549	2.16803e-10	-0.709867	0.000215518	-1.16212	6.88234e-09
ADAM28	2.02464	6.66145e-22	-0.104057	0.77701	-0.906529	2.01191e-08	0.0249615	0.950986	1.92059	9.34231e-21	1.11811	2.07555e-11	2.0496	3.02237e-22
ADAM29	-0.0174336	0.956119	-0.240394	0.714728	0.483765	0.0970211	-0.0541447	0.944299	-0.257828	0.362028	0.466331	0.105777	-0.0715783	0.811136
ADAM32	-0.235222	0.120025	-0.0892293	0.833145	-0.562635	0.000399945	-0.194637	0.552566	-0.324451	0.0312108	-0.797857	8.51849e-07	-0.429859	0.00401035
ADAM8	1.30292	3.13591e-14	-0.408816	0.0436488	-1.02005	5.1162e-10	0.0143349	0.972265	0.894108	5.49394e-09	0.282876	0.0517927	1.31726	1.57913e-14
ADAM9	0.0722277	0.691583	-0.0556997	0.920236	-0.0426106	0.841542	-0.139475	0.720275	0.0165281	0.93247	0.0296171	0.889536	-0.0672472	0.710154
ADAMDEC1	1.11617	3.83785e-05	-0.140645	0.854773	-0.654358	0.0184783	0.0591844	0.937821	0.975521	0.000281002	0.461808	0.0981834	1.17535	1.48017e-05
ADAMTS1	1.11907	0.000101712	-0.0911118	0.922065	-0.276788	0.385061	0.0622835	0.938307	1.02796	0.000338366	0.842282	0.00400915	1.18135	4.12259e-05
ADAMTS12	-0.0768675	0.709133	-0.178326	0.69058	-0.305396	0.135998	-0.199802	0.641928	-0.255193	0.187801	-0.382264	0.0547243	-0.27667	0.146278
ADAMTS13	-0.232572	0.129774	0.180276	0.571319	0.209256	0.209066	0.0110431	0.981154	-0.0522957	0.754659	-0.0233155	0.903203	-0.221528	0.147149
ADAMTS14	0.420007	0.0418793	-0.617315	0.0395238	-1.4436	1.96251e-09	-0.113558	0.82316	-0.197308	0.357152	-1.02359	3.51684e-06	0.306449	0.138956
ADAMTS15	-0.213046	0.371634	-0.718599	0.0295653	-0.355455	0.154389	-0.443978	0.319764	-0.931646	7.84748e-05	-0.568501	0.0176274	-0.657024	0.0041599
ADAMTS17	0.561154	0.000742288	0.0266377	0.965467	-0.280837	0.113395	-0.0158331	0.97457	0.587792	0.000443747	0.280318	0.108953	0.545321	0.000962527
ADAMTS3	0.439007	0.0351258	-0.203528	0.672814	-0.868706	9.63029e-05	-0.00181347	0.997412	0.235479	0.273084	-0.429699	0.0491876	0.437194	0.0349758
ADAMTS4	-0.293258	0.214588	-0.167388	0.782986	0.32635	0.197993	0.152752	0.783977	-0.460646	0.0485279	0.033092	0.909833	-0.140507	0.565871
ADAMTS5	-0.638559	0.0230587	-0.991491	0.010835	-1.42367	3.53311e-06	-1.11683	0.00477678	-1.63005	8.01768e-08	-2.06223	2.11784e-10	-1.75538	1.01865e-08
ADAMTS6	1.10057	1.66762e-05	-0.739239	0.0400387	-1.42953	2.29209e-07	-0.289608	0.596533	0.361332	0.151778	-0.328957	0.218227	0.810963	0.00107009
ADAMTS7	-0.573779	0.000364784	-0.448954	0.0554793	-0.437497	0.00881835	-0.555585	0.0167713	-1.02273	5.77643e-09	-1.01128	1.19552e-08	-1.12936	2.73846e-10
ADAMTS8	-1.08948	5.49013e-08	0.0222846	0.97496	0.154066	0.468358	0.311451	0.411425	-1.06719	9.58084e-08	-0.935412	2.55875e-06	-0.778027	4.00096e-05
ADAMTS9	0.426527	0.183952	-1.15238	0.0081631	-2.43177	1.43416e-10	-0.956076	0.0499122	-0.725857	0.0222211	-2.00525	1.32003e-08	-0.529549	0.0942101
ADAMTSL1	-0.28189	0.260671	-0.18506	0.768858	0.1607	0.575279	0.0353327	0.960165	-0.466951	0.058431	-0.12119	0.674859	-0.246558	0.32537
ADAMTSL3	2.62784	1.00187e-21	-0.26082	0.47605	-1.58218	6.47949e-12	0.117261	0.792305	2.36702	1.38635e-19	1.04566	2.36647e-07	2.7451	1.06909e-22
ADAMTSL4	1.62176	1.13042e-11	0.214913	0.638734	-0.0782478	0.755992	0.429356	0.259557	1.83667	1.74746e-13	1.54351	8.78474e-11	2.05112	2.0081e-15
ADAMTSL4-AS1	0.554289	0.011165	-0.0774792	0.912552	-0.185826	0.457194	0.190049	0.709543	0.47681	0.0298708	0.368463	0.112415	0.744338	0.000693309
ADAMTSL5	0.626587	2.83495e-09	0.0652438	0.795365	-0.248746	0.0128852	0.183643	0.318901	0.691831	1.77205e-10	0.377842	0.00014979	0.81023	7.98742e-13
ADAP1	0.267542	0.00271738	0.135689	0.424131	-0.0294226	0.789836	0.262992	0.0575068	0.403232	1.27639e-05	0.23812	0.00994541	0.530534	3.31121e-08
ADAP2	-0.595264	0.000238291	0.203915	0.532796	0.0556814	0.777471	0.0278844	0.951497	-0.391348	0.0144963	-0.539582	0.00113855	-0.567379	0.000412043
ADAR	1.99203	2.28597e-30	-0.168128	0.317523	-0.70522	3.3405e-10	-0.0127423	0.962951	1.8239	2.85815e-28	1.28681	1.80873e-20	1.97929	2.81635e-30
ADARB1	-0.129183	0.239106	-0.0576659	0.85289	-0.0723541	0.564145	0.140529	0.549482	-0.186849	0.0852411	-0.201537	0.0751267	0.011346	0.924724
ADARB2	-0.46072	0.0443476	-0.0605625	0.938205	0.329239	0.187213	-0.0639825	0.921735	-0.521282	0.023248	-0.131481	0.620751	-0.524702	0.0210734
ADAT1	0.0803952	0.0772144	0.00549254	0.97496	-0.0375789	0.469073	-0.0299981	0.783977	0.0858878	0.0599357	0.0428163	0.395086	0.0503972	0.274328
ADAT2	0.261942	0.0961719	0.183586	0.576847	0.28552	0.0882743	0.121933	0.737788	0.445528	0.00460812	0.547462	0.000775833	0.383875	0.013615
ADAT3	-0.250657	0.0678997	0.0379493	0.934266	-0.0547538	0.744735	0.0229439	0.952771	-0.212708	0.126206	-0.305411	0.0327931	-0.227713	0.0962935
ADCK1	0.0977462	0.259483	0.0250964	0.928557	0.049731	0.620294	-0.0535164	0.792499	0.122843	0.15468	0.147477	0.0999602	0.0442298	0.623856
ADCK2	-0.141484	0.033748	0.107266	0.388401	0.260777	0.000233301	0.0730253	0.62634	-0.0342182	0.633696	0.119293	0.090352	-0.0684591	0.315078
ADCK5	-0.0859067	0.402104	-0.0373196	0.906279	0.00681367	0.959601	0.16259	0.423375	-0.123226	0.223133	-0.079093	0.476982	0.0766834	0.454508
ADCY1	-0.267336	0.293525	-0.0905235	0.910317	-0.0550028	0.862511	0.158931	0.789506	-0.357859	0.156406	-0.322339	0.228733	-0.108405	0.68427
ADCY10P1	-1.18515	4.86991e-13	0.184988	0.496651	0.609941	3.13465e-05	-0.00755138	0.985604	-1.00016	1.3342e-10	-0.57521	5.98308e-05	-1.1927	3.04518e-13
ADCY2	0.440866	0.00948747	-0.33856	0.240071	-0.378574	0.0352088	0.160677	0.682794	0.102306	0.573354	0.0622928	0.762608	0.601543	0.00044037
ADCY3	-0.374545	0.000195866	0.0993535	0.659701	0.617589	3.7779e-08	0.046121	0.853944	-0.275191	0.0056108	0.243044	0.0183282	-0.328424	0.00092644
ADCY4	1.68113	4.33194e-11	-0.163398	0.775538	-0.847949	0.000304302	0.05119	0.935449	1.51773	9.75134e-10	0.833184	0.000311288	1.73232	1.32564e-11
ADCY5	-0.0783318	0.735521	-0.354607	0.361113	-0.23128	0.328497	-0.20689	0.669553	-0.432939	0.0423032	-0.309612	0.172796	-0.285221	0.18214
ADCY6	0.306413	4.03837e-06	0.0206369	0.921994	0.0476388	0.518006	0.0918549	0.499392	0.32705	1.17561e-06	0.354052	3.29617e-07	0.398268	9.67782e-09
ADCY7	1.0725	1.78267e-06	-0.296815	0.482696	-0.968381	2.59476e-05	0.113103	0.83056	0.775685	0.000355916	0.10412	0.680272	1.1856	1.86451e-07
ADCY9	-0.285629	0.00173823	-0.0904286	0.663043	-0.000805711	0.995277	-0.0682625	0.752249	-0.376058	5.53699e-05	-0.286435	0.00236594	-0.353892	0.00012089
ADD1	0.0104604	0.808157	-0.0778088	0.233794	0.00392656	0.940667	-0.0525297	0.532005	-0.0673483	0.0850914	0.014387	0.758749	-0.0420693	0.28618
ADD3	0.448495	0.000141367	-0.00997455	0.980911	-0.274479	0.0244107	-0.0509029	0.863136	0.43852	0.000201447	0.174015	0.160012	0.397592	0.000624847
ADD3-AS1	0.0455165	0.816722	-0.0524584	0.928219	-0.397358	0.032613	-0.115633	0.784399	-0.00694186	0.972895	-0.351842	0.0570934	-0.0701165	0.71149
ADGB	-1.56031	1.70136e-12	-0.00877612	0.988941	-0.401051	0.0414564	-0.00609649	0.990428	-1.56909	1.49704e-12	-1.96136	6.3923e-16	-1.56641	1.16481e-12
ADGRA1	-1.15117	1.51839e-08	0.0924147	0.867861	0.0196499	0.937892	-0.186885	0.658458	-1.05876	1.24937e-07	-1.13152	3.85643e-08	-1.33806	1.93394e-10
ADGRA2	0.10873	0.564187	-0.343153	0.261228	-0.522925	0.005209	-0.44298	0.141393	-0.234423	0.198032	-0.414195	0.0258306	-0.33425	0.0597617
ADGRA3	-1.42225	1.33077e-18	0.143045	0.5621	0.682755	2.12724e-07	-0.0161453	0.962263	-1.27921	1.30317e-16	-0.739498	1.70364e-08	-1.4384	6.20512e-19
ADGRB1	0.0351666	0.895152	-0.698306	0.04159	-0.483721	0.0528216	-0.516026	0.226361	-0.663139	0.00502816	-0.448554	0.0702881	-0.480859	0.0401184
ADGRB2	-0.214301	0.0932273	0.0398541	0.924475	0.180856	0.191691	-0.0709961	0.820659	-0.174447	0.178334	-0.0334452	0.830257	-0.285297	0.0237094
ADGRE2	0.743175	0.000438183	0.385554	0.291214	0.45431	0.0397353	0.489912	0.177305	1.12873	3.96137e-07	1.19748	1.61775e-07	1.23309	4.20198e-08
ADGRE3	-0.183459	0.491656	0.0606011	0.946046	0.945172	0.000443165	-0.198346	0.737538	-0.122858	0.654086	0.761713	0.00382929	-0.381805	0.134126
ADGRE5	0.605399	1.53919e-08	-0.00114853	0.997043	-0.496582	3.43596e-06	0.0734892	0.752481	0.604251	1.71753e-08	0.108817	0.310161	0.678888	5.72804e-10
ADGRF1	-0.138889	0.0914013	0.146939	0.310961	0.278	0.0012728	-0.0520886	0.791414	0.00805012	0.93247	0.139111	0.108927	-0.190977	0.0187943
ADGRF2	-0.952149	1.53025e-05	-0.274785	0.529176	-0.247739	0.29446	-0.0734106	0.902063	-1.22693	9.35945e-08	-1.19989	2.4496e-07	-1.02556	3.62212e-06
ADGRF3	0.132193	0.635357	0.281487	0.624061	-0.128349	0.680747	0.260857	0.659803	0.41368	0.118005	0.00384391	0.990753	0.39305	0.132877
ADGRF4	-0.323605	0.0444199	-0.268922	0.36125	-0.651041	0.000146384	-0.0688635	0.868603	-0.592527	0.00029249	-0.974645	4.18193e-08	-0.392468	0.0140667
ADGRF5	-1.36409	7.89905e-12	0.294866	0.334972	1.05292	4.60306e-08	0.141004	0.720859	-1.06923	1.07863e-08	-0.311172	0.0832332	-1.22309	1.9454e-10
ADGRG1	0.00536898	0.95466	-0.109412	0.498418	-0.152078	0.0778631	0.0707521	0.707132	-0.104043	0.208212	-0.146709	0.0854035	0.076121	0.358586
ADGRG2	0.392664	0.015357	-0.249459	0.418619	-0.0847176	0.66236	0.109525	0.778828	0.143205	0.397563	0.307947	0.07138	0.502189	0.00193055
ADGRG3	-0.666591	0.0088572	-0.325147	0.534107	0.218321	0.453114	-0.469095	0.350436	-0.991738	0.000139175	-0.44827	0.0963179	-1.13569	1.45977e-05
ADGRG6	0.0922872	0.570558	-0.113498	0.775243	0.0642483	0.732557	0.00135567	0.997412	-0.0212113	0.904906	0.156536	0.355003	0.0936429	0.563084
ADGRG7	-0.602555	0.0577852	-0.105719	0.91931	-1.05887	0.00152204	-0.367627	0.600533	-0.708274	0.0259383	-1.66142	1.15519e-06	-0.970182	0.002154
ADGRL1	-0.368594	0.00012354	0.0560415	0.833145	0.463947	5.90142e-06	-0.00887836	0.974927	-0.312553	0.00102905	0.0953529	0.358707	-0.377472	8.08182e-05
ADGRL2	0.227052	0.0849645	-0.100776	0.765509	-0.0949013	0.532942	-0.0117956	0.976392	0.126276	0.353822	0.132151	0.361207	0.215257	0.101015
ADGRL3	-0.888708	0.000396931	0.0393717	0.966088	0.350498	0.195122	-0.201617	0.725522	-0.849336	0.000711537	-0.53821	0.0379111	-1.09032	1.8176e-05
ADGRL4	-0.054944	0.845413	-0.219067	0.718045	-0.422573	0.116804	-0.342258	0.527634	-0.274011	0.289017	-0.477517	0.0700856	-0.397202	0.113273
ADGRV1	-0.876725	1.42881e-08	0.0992219	0.789753	0.76888	8.4039e-07	0.102134	0.761502	-0.777503	2.71181e-07	-0.107845	0.501052	-0.774591	2.46397e-07
ADH1C	-1.86105	3.82672e-10	0.470879	0.313221	3.14112	7.15058e-17	-0.113342	0.866884	-1.39017	6.45506e-07	1.28007	5.14924e-06	-1.97439	5.18333e-11
ADH4	-0.0385364	0.883965	0.195456	0.733651	0.216653	0.41216	-0.20931	0.698157	0.156919	0.525857	0.178116	0.499417	-0.247846	0.296661
ADH5	-0.0999893	0.058443	-0.0161797	0.926282	0.122763	0.0271904	-0.0326764	0.797597	-0.116169	0.0281588	0.0227737	0.717244	-0.132666	0.0113494
ADH6	-2.59279	3.55333e-17	-0.0918349	0.901709	-0.185096	0.487713	-0.30818	0.54324	-2.68463	1.00339e-17	-2.77789	4.30868e-18	-2.90097	2.24369e-19
ADH7	-1.3766	5.40298e-07	0.399264	0.417134	2.04999	6.24422e-11	0.290639	0.617558	-0.977333	0.000213863	0.673392	0.0123346	-1.08596	4.03832e-05
ADHFE1	-0.517378	0.00143266	-0.00922936	0.986087	0.149304	0.414887	-0.249097	0.462011	-0.526607	0.00123602	-0.368074	0.0289876	-0.766475	4.67386e-06
ADI1	-0.269438	0.000398276	0.0373606	0.867429	0.447536	1.13574e-07	-0.080888	0.632927	-0.232077	0.00218251	0.178099	0.0229849	-0.350326	6.60056e-06
ADIPOR1	-0.155535	8.40371e-06	-0.00251865	0.9835	0.0446584	0.226722	0.0166579	0.841809	-0.158053	6.60693e-06	-0.110876	0.0015046	-0.138877	5.12838e-05
ADIPOR2	0.245497	1.28074e-05	0.0844995	0.411774	0.0136174	0.843723	0.0676616	0.572296	0.329997	2.60502e-08	0.259115	7.61604e-06	0.313159	7.66663e-08
ADIRF	0.552856	0.00113884	0.18155	0.625789	0.286757	0.114336	0.608089	0.0127189	0.734406	2.52808e-05	0.839612	3.3556e-06	1.16094	7.15692e-10
ADIRF-AS1	-0.269615	0.0831963	0.107297	0.792971	0.430488	0.00819515	0.44709	0.0667969	-0.162318	0.310839	0.160873	0.345659	0.177475	0.259543
ADK	-0.134818	0.101781	0.119569	0.453262	0.384073	1.41723e-05	0.172675	0.255044	-0.0152483	0.870151	0.249255	0.00332489	0.0378573	0.666713
ADM	1.75014	3.51838e-23	-0.265938	0.143657	-0.587667	2.93429e-06	0.0190092	0.953618	1.4842	8.68598e-20	1.16247	3.25436e-15	1.76915	1.78406e-23
ADM2	1.35295	1.48449e-09	-0.0605907	0.927349	-1.17282	1.75583e-07	0.25201	0.568497	1.29236	5.61261e-09	0.18013	0.420645	1.60496	6.60609e-12
ADM5	-0.465544	0.0185966	0.0730222	0.909607	0.0954704	0.687765	0.0740124	0.890685	-0.392522	0.0487907	-0.370074	0.0761411	-0.391532	0.0470055
ADNP	0.160955	0.0514804	-0.0268496	0.921684	-0.0948127	0.300479	-0.0934802	0.613021	0.134105	0.108871	0.066142	0.476806	0.0674746	0.429668
ADNP-AS1	-0.0750944	0.683303	-0.0302157	0.962166	-0.218019	0.245484	-0.0639246	0.890218	-0.10531	0.562319	-0.293113	0.104421	-0.139019	0.430974
ADNP2	0.435359	2.03403e-06	0.074614	0.727266	0.0114296	0.922032	-0.0771325	0.704261	0.509973	6.76579e-08	0.446789	1.93734e-06	0.358226	5.71135e-05
ADO	0.0981332	0.140221	-0.00953328	0.970008	-0.0914348	0.204329	-0.102299	0.459513	0.0885999	0.188032	0.00669844	0.937164	-0.00416594	0.954922
ADORA1	-0.389196	0.0933013	0.151205	0.807437	0.603887	0.0127512	-0.167197	0.760529	-0.237991	0.318714	0.214691	0.40217	-0.556393	0.0151689
ADORA2B	-0.319216	0.0207325	0.0436233	0.923741	0.238092	0.108785	-0.0256255	0.948489	-0.275593	0.0474132	-0.0811247	0.612312	-0.344842	0.0120251
ADPGK	0.249585	2.029e-08	-0.0497491	0.559942	-0.124937	0.00359202	-0.0611834	0.480245	0.199836	3.03201e-06	0.124648	0.0032462	0.188402	7.91426e-06
ADPGK-AS1	0.182347	0.432912	-0.228226	0.651152	-0.311592	0.200424	-0.0077273	0.990089	-0.045879	0.855885	-0.129245	0.616489	0.17462	0.450141
ADPRH	0.500178	0.000291201	0.0722677	0.855346	-0.528869	0.000255789	0.181865	0.541207	0.572446	4.38535e-05	-0.0286911	0.86643	0.682043	1.66133e-06
ADPRHL1	-0.619682	8.60499e-05	0.0286923	0.960737	-0.162824	0.347568	-0.0333493	0.940098	-0.59099	0.000176428	-0.782506	2.34262e-06	-0.653032	3.52964e-05
ADPRHL2	1.00008	3.51063e-16	-0.155837	0.373151	-0.500228	1.52851e-06	0.168072	0.376351	0.844238	2.2657e-13	0.499848	1.01233e-06	1.16815	4.04188e-19
ADPRM	0.534648	9.47669e-06	-0.230843	0.242336	-0.482785	0.00010336	0.133011	0.60912	0.303805	0.00928987	0.0518627	0.707128	0.667659	8.46025e-08
ADRA1B	-0.317438	0.115971	-0.919635	0.000530399	-1.32982	7.88404e-09	-0.560138	0.0808068	-1.23707	1.66976e-08	-1.64725	5.36782e-12	-0.877576	1.95136e-05
ADRA2B	0.320519	0.14683	0.0114209	0.987386	0.171612	0.494912	0.0312075	0.960566	0.33194	0.135464	0.492131	0.0311816	0.351727	0.108132
ADRB1	-0.139119	0.392224	0.211899	0.498964	0.0767704	0.682301	0.122393	0.737538	0.0727799	0.667748	-0.0623491	0.74011	-0.016726	0.924022
ADRB2	1.30796	4.71296e-16	-0.0628648	0.865888	-0.369843	0.00480675	0.0405081	0.907972	1.2451	3.64156e-15	0.938117	9.99163e-11	1.34847	1.02728e-16
ADRM1	0.160078	0.0196992	0.0200537	0.929752	0.000300499	0.997649	0.110334	0.437947	0.180132	0.00897442	0.160379	0.0252202	0.270413	0.00010496
ADSL	-0.274716	0.000451577	0.0977065	0.539324	0.192798	0.017901	0.0984342	0.564045	-0.177009	0.0226784	-0.0819173	0.335577	-0.176281	0.0219187
ADSS	0.296889	1.55495e-05	0.0941434	0.472581	-0.151675	0.0307631	0.0732247	0.625036	0.391032	5.64707e-08	0.145213	0.0368573	0.370113	1.71744e-07
ADSSL1	-0.697879	3.43502e-09	-0.203548	0.267388	-0.0276547	0.838026	-0.252518	0.169382	-0.901427	1.4526e-12	-0.725533	1.9204e-09	-0.950397	1.66227e-13
ADTRP	0.487654	0.00285544	-0.00965524	0.985834	-0.802189	6.04822e-06	-0.00559864	0.990205	0.477999	0.00355771	-0.314535	0.0669173	0.482055	0.003034
AEBP1	0.425333	0.0181902	0.13673	0.768095	0.0550693	0.806928	-0.0338154	0.948037	0.562062	0.00198435	0.480402	0.010225	0.391517	0.0289007
AEBP2	0.0417993	0.710084	-0.0472089	0.882625	0.027804	0.83182	-0.119063	0.60488	-0.00540965	0.963864	0.0696033	0.557374	-0.0772634	0.472761
AEN	0.156334	0.0707306	-0.0516635	0.830988	-0.318319	0.000488822	-0.0525051	0.802325	0.10467	0.236883	-0.161986	0.0745656	0.103828	0.23468
AES	0.252317	0.00214358	-0.0123008	0.969152	-0.145466	0.0975129	0.0838269	0.652693	0.240016	0.00355771	0.106851	0.227275	0.336144	5.6249e-05
AFAP1	0.279403	0.0218349	-0.353069	0.0477271	-0.507263	9.90776e-05	-0.229935	0.334621	-0.0736655	0.571479	-0.22786	0.0763323	0.049468	0.706536
AFAP1-AS1	0.371559	0.070308	-0.560055	0.0657825	-0.291831	0.191138	-0.243344	0.592687	-0.188497	0.376202	0.079728	0.74585	0.128215	0.551683
AFAP1L1	-0.0652036	0.44224	0.0760338	0.692107	-0.0542273	0.567503	0.217592	0.101106	0.0108301	0.908046	-0.119431	0.169806	0.152389	0.0597729
AFAP1L2	-0.511988	3.14614e-05	-0.303195	0.0952853	-0.281243	0.0257152	-0.266996	0.21457	-0.815183	1.17764e-09	-0.793231	3.85623e-09	-0.778984	3.2936e-09
AFDN	-0.172249	0.00225138	-0.0750067	0.50726	-0.129999	0.0282797	-0.0262139	0.853863	-0.247256	2.09837e-05	-0.302248	6.78411e-07	-0.198463	0.000447301
AFF1	0.411018	0.000680037	-0.17506	0.453262	-0.160342	0.223019	-0.101084	0.716347	0.235958	0.0503889	0.250676	0.0458177	0.309934	0.00928638
AFF2	-0.10011	0.682874	-0.211471	0.693624	-0.00459246	0.988171	-0.0768102	0.903362	-0.311581	0.178414	-0.104702	0.696355	-0.17692	0.4526
AFF4	0.374517	0.0100791	-0.0298312	0.955282	-0.181089	0.260215	-0.0922994	0.791895	0.344685	0.0183469	0.193427	0.218775	0.282217	0.0518309
AFG1L	0.024224	0.790415	-0.0271912	0.920772	-0.159657	0.0691028	-0.0613535	0.754342	-0.0029672	0.975165	-0.135433	0.122212	-0.0371295	0.675287
AFG3L1P	0.484702	6.15049e-10	0.0125233	0.962166	-0.107191	0.156181	-0.0232427	0.905364	0.497225	3.13147e-10	0.377511	5.79689e-07	0.461459	2.06584e-09
AFG3L2	-0.0411316	0.358582	0.0740754	0.344865	0.135199	0.00298305	0.0346699	0.729689	0.0329438	0.470322	0.0940674	0.0378577	-0.00646167	0.892804
AFMID	-0.529818	7.46459e-06	0.267044	0.136314	0.799033	1.82407e-09	-0.0038977	0.990205	-0.262774	0.0214368	0.269215	0.0232878	-0.533716	5.94504e-06
AFTPH	0.090862	0.0705947	-0.0161025	0.922579	-0.0138021	0.826754	-0.00255063	0.986542	0.0747595	0.142393	0.07706	0.150088	0.0883114	0.0775013
AGA	0.431952	2.74666e-07	-0.0476447	0.828396	-0.070424	0.432596	0.126473	0.438784	0.384307	3.27466e-06	0.361528	1.52627e-05	0.558425	2.99826e-10
AGAP1	-0.804955	1.01271e-16	0.151673	0.220796	0.493877	6.62799e-09	-0.0298637	0.877217	-0.653282	3.05597e-13	-0.311078	6.33267e-05	-0.834819	1.6351e-17
AGAP12P	-0.0415699	0.847868	-0.104179	0.850582	-0.477156	0.0183571	0.19042	0.663601	-0.145749	0.472242	-0.518726	0.00933964	0.14885	0.456138
AGAP2	-0.411393	0.0995851	0.0487148	0.9589	0.0580469	0.854671	-0.0145973	0.984497	-0.362678	0.151447	-0.353346	0.185146	-0.42599	0.0859859
AGAP2-AS1	-0.280602	0.0143927	-0.142603	0.547989	0.0460105	0.744299	-0.0478019	0.872643	-0.423205	0.000288849	-0.234592	0.0512753	-0.328404	0.00407343
AGAP3	-0.131972	0.0682857	-0.0926012	0.531111	0.0487014	0.56324	-0.00758686	0.971432	-0.224573	0.00201929	-0.0832702	0.290558	-0.139558	0.0521854
AGAP4	0.365494	0.00601002	-0.0508226	0.905715	-0.0406632	0.806886	-0.0813802	0.800688	0.314672	0.0183901	0.324831	0.0190687	0.284114	0.0317662
AGAP5	0.180868	0.448767	0.263855	0.583758	0.126348	0.642759	0.209313	0.692026	0.444723	0.0530271	0.307216	0.212133	0.39018	0.0872113
AGAP6	0.258145	0.0263098	0.00043785	0.999255	0.0337681	0.817172	-0.0836394	0.762238	0.258583	0.0267674	0.291913	0.0157889	0.174506	0.134875
AGAP9	0.57321	7.30783e-05	-0.0836808	0.83384	-0.277262	0.0654272	0.118372	0.71774	0.489529	0.000629404	0.295948	0.0456039	0.691581	2.64374e-06
AGBL1-AS1	0.960681	2.55181e-05	-0.259795	0.576921	-0.991574	3.17611e-05	0.11545	0.833065	0.700886	0.00171195	-0.0308935	0.912034	1.07613	3.04469e-06
AGBL2	-1.05168	2.03167e-10	-0.227873	0.406658	-0.843725	2.10889e-07	-0.320114	0.224352	-1.27956	3.64969e-13	-1.89541	1.21279e-19	-1.3718	2.09518e-14
AGBL3	-0.704415	4.1987e-06	-0.0429873	0.929197	-0.334413	0.0308596	-0.202441	0.523966	-0.747402	1.38281e-06	-1.03883	6.03362e-10	-0.906856	1.3128e-08
AGBL4	-0.942624	5.50153e-06	-0.434547	0.17992	-0.76827	0.000281137	-0.398323	0.292364	-1.37717	7.82408e-10	-1.71089	1.23328e-12	-1.34095	1.31078e-09
AGBL5	-1.1282	4.38023e-16	-0.0723809	0.799554	0.142057	0.228938	-0.127339	0.59405	-1.20058	4.10103e-17	-0.986145	1.15599e-13	-1.25554	3.9363e-18
AGER	0.609197	0.00153867	0.0704389	0.909711	0.209163	0.327799	-0.161843	0.715543	0.679636	0.000465686	0.81836	4.95321e-05	0.447354	0.0186413
AGFG1	-0.0282984	0.762088	-0.0116564	0.971915	-0.00655823	0.95484	-0.0793156	0.688006	-0.0399548	0.664864	-0.0348566	0.733307	-0.107614	0.211816
AGFG2	0.0180665	0.907133	0.0501999	0.909607	0.432843	0.00250034	-0.0169496	0.9665	0.0682664	0.64191	0.45091	0.00142216	0.0011169	0.994102
AGGF1	0.0109031	0.877988	-0.0404306	0.813246	-0.0608904	0.390879	-0.0994976	0.446885	-0.0295276	0.663668	-0.0499874	0.480045	-0.0885946	0.160825
AGK	0.60155	2.0505e-11	-0.00921921	0.97496	-0.41565	1.05968e-06	0.089966	0.598612	0.592331	3.6188e-11	0.1859	0.0209729	0.691516	1.43141e-13
AGL	-0.93179	3.60381e-07	0.0745667	0.889242	0.553807	0.00223283	-0.141136	0.722684	-0.857223	2.17991e-06	-0.377984	0.0357571	-1.07293	1.05806e-08
AGMAT	0.0571877	0.773906	0.156092	0.723258	0.256906	0.193379	0.0647965	0.896873	0.21328	0.251806	0.314094	0.101077	0.121984	0.519967
AGMO	-0.326641	0.0828317	-0.347474	0.287954	-0.410571	0.0382991	-0.188374	0.658402	-0.674115	0.000397987	-0.737212	0.000172303	-0.515015	0.00576461
AGO1	-0.493388	2.35449e-12	-0.0217815	0.909743	0.19164	0.00215382	-0.0635113	0.635279	-0.515169	5.74466e-13	-0.301748	2.16875e-06	-0.556899	2.4888e-14
AGO2	-0.391869	0.000655729	0.0309148	0.935828	0.219885	0.0700914	-0.0188263	0.953618	-0.360954	0.00167768	-0.171984	0.158003	-0.410695	0.000344658
AGO3	0.158666	0.128837	-0.0268632	0.940197	-0.0522473	0.673405	-0.0949248	0.692026	0.131802	0.213477	0.106418	0.350658	0.0637408	0.559024
AGO4	0.00174919	0.985848	-0.102569	0.547106	0.0777135	0.405642	-0.202432	0.147555	-0.10082	0.233044	0.0794627	0.384249	-0.200683	0.0142461
AGPAT1	-0.2727	2.86826e-06	0.0283115	0.864119	0.243904	4.50591e-05	0.000446388	0.997562	-0.244389	2.18934e-05	-0.0287961	0.660406	-0.272254	2.68593e-06
AGPAT2	-0.0147547	0.884802	-0.00915261	0.979048	-0.214388	0.023463	0.162075	0.362238	-0.0239074	0.811411	-0.229143	0.014081	0.147321	0.101253
AGPAT3	0.273137	5.71973e-07	-0.0621391	0.564582	-0.169036	0.00184929	0.00212038	0.987793	0.210998	6.62537e-05	0.104101	0.0542957	0.275257	4.33256e-07
AGPAT4	-0.827507	2.96011e-15	-0.074711	0.706416	-0.343761	0.000100768	-0.268356	0.0299534	-0.902218	1.11165e-16	-1.17127	3.31714e-21	-1.09586	1.74144e-20
AGPAT4-IT1	-0.441791	0.0720332	-0.166581	0.79592	0.150181	0.602897	-0.10928	0.860551	-0.608372	0.0131828	-0.291611	0.274041	-0.551071	0.0234435
AGPAT5	-0.622364	7.45552e-09	0.0745805	0.767386	0.416314	7.21924e-05	-0.0460645	0.852364	-0.547784	1.846e-07	-0.206051	0.0446434	-0.668429	8.96966e-10
AGPS	-0.303745	0.00336772	0.050088	0.873916	0.0358732	0.778558	-0.0955279	0.690094	-0.253657	0.0144848	-0.267872	0.012642	-0.399273	0.000138052
AGR2	1.86705	4.60856e-18	0.112659	0.787625	-0.149389	0.408403	0.175059	0.625036	1.9797	4.49068e-19	1.71766	2.68914e-16	2.0421	7.20864e-20
AGR3	-0.964034	4.61368e-07	-0.0738185	0.896963	-0.448995	0.0178269	-0.18885	0.643129	-1.03785	9.23294e-08	-1.41303	2.55138e-11	-1.15288	5.23844e-09
AGRN	1.06189	6.89497e-20	-0.168418	0.221432	-0.589566	9.98407e-10	-0.0609788	0.754849	0.89347	1.23852e-16	0.472322	1.52374e-07	1.00091	6.90659e-19
AGT	-0.423104	0.0249376	-0.0160829	0.980911	-0.132418	0.547371	0.112215	0.808275	-0.439187	0.0204604	-0.555522	0.00455577	-0.310889	0.0999527
AGTPBP1	-0.798338	3.11429e-12	0.219205	0.15606	0.493061	3.16271e-06	0.0461318	0.84972	-0.579133	3.74382e-08	-0.305277	0.00238047	-0.752206	1.72368e-11
AGTRAP	0.0765181	0.467019	-0.0610542	0.826771	-0.17876	0.0966667	0.0369312	0.893821	0.0154639	0.893774	-0.102242	0.355598	0.113449	0.266341
AHCTF1	-0.246452	0.0117181	0.081185	0.73647	0.145218	0.172577	-0.0118435	0.967192	-0.165267	0.0951736	-0.101234	0.347706	-0.258295	0.00796031
AHCY	-0.417253	7.86383e-06	0.214517	0.127203	0.497139	5.92091e-07	0.181737	0.285364	-0.202736	0.0246739	0.0798858	0.426058	-0.235516	0.00843433
AHCYL1	-0.205954	0.00709287	0.096712	0.538895	0.313489	0.000122971	0.00269802	0.989827	-0.109242	0.161421	0.107534	0.191246	-0.203256	0.00755908
AHCYL2	0.898359	7.83609e-11	0.134267	0.608034	-0.0897775	0.519465	0.00149483	0.996051	1.03263	8.85594e-13	0.808582	2.76583e-09	0.899854	5.98513e-11
AHDC1	-0.0303486	0.72003	-0.0921337	0.571319	-0.157543	0.0563451	-0.0958319	0.577098	-0.122482	0.120702	-0.187892	0.0203148	-0.126181	0.104997
AHI1	-0.631721	1.13961e-06	0.0563149	0.882365	0.402732	0.00190853	0.0138548	0.968976	-0.575406	7.35689e-06	-0.228989	0.0778587	-0.617866	1.62044e-06
AHNAK	-0.340776	0.0109893	-0.135437	0.65758	-0.0449418	0.786575	0.144623	0.63254	-0.476213	0.000467284	-0.385718	0.00554429	-0.196153	0.145407
AHNAK2	-0.18173	0.25757	-0.287545	0.296401	-0.531147	0.00132697	0.0644215	0.874626	-0.469275	0.00295819	-0.712877	1.80502e-05	-0.117308	0.4724
AHR	0.298711	0.089285	0.0929724	0.854927	0.0537023	0.805996	-0.105449	0.805162	0.391683	0.0255977	0.352413	0.0547589	0.193262	0.277378
AHRR	0.249316	0.13586	0.0306435	0.960737	-0.0701281	0.729128	0.0650191	0.881992	0.27996	0.0945378	0.179188	0.323303	0.314335	0.0566406
AHSA1	-0.364664	4.02975e-08	0.0594751	0.67667	-0.0588123	0.396839	0.0602557	0.666919	-0.305188	2.19593e-06	-0.423476	1.24094e-09	-0.304408	1.98295e-06
AHSA2P	-0.168823	0.171063	0.000267993	0.999438	0.260686	0.0430916	-0.0610552	0.839693	-0.168555	0.174865	0.0918629	0.506202	-0.229878	0.0581205
AIDA	0.847929	3.73386e-12	-0.126226	0.559127	-0.620189	9.60069e-08	0.0945471	0.692221	0.721704	5.96478e-10	0.22774	0.035187	0.942476	7.30804e-14
AIF1L	-1.17373	7.90925e-15	0.233599	0.255693	1.07804	1.43056e-12	0.176173	0.494931	-0.94013	1.98323e-11	-0.0956854	0.480786	-0.997557	2.05523e-12
AIFM1	-0.234785	0.000613	0.073866	0.619819	0.311632	2.04201e-05	0.0435775	0.789417	-0.160919	0.0180575	0.0768473	0.300408	-0.191207	0.00464544
AIFM2	0.291946	1.76067e-05	0.1703	0.0861382	0.360005	7.54529e-07	0.149865	0.199125	0.462246	5.09164e-10	0.651951	7.28907e-15	0.44181	1.4556e-09
AIFM3	-0.0541952	0.768719	-0.0415539	0.944307	-0.0361349	0.867385	-0.158086	0.683762	-0.0957491	0.594872	-0.0903301	0.645759	-0.212281	0.211377
AIG1	-0.0429528	0.473827	0.109984	0.26209	0.311028	8.39291e-07	0.262128	0.000729339	0.0670308	0.254651	0.268075	1.03462e-05	0.219175	0.000153678
AIM2	5.31401	1.29012e-30	-0.354009	0.471426	-2.41615	1.25434e-13	0.203253	0.725336	4.96	5.89117e-29	2.89786	1.47091e-17	5.51727	1.54034e-31
AIMP1	0.180641	0.00215317	0.0632186	0.624907	0.0292902	0.676676	0.0387521	0.783977	0.24386	5.23163e-05	0.209931	0.000592432	0.219393	0.000214185
AIMP2	-0.207831	0.0113268	0.199546	0.117171	0.277796	0.00133796	0.0959769	0.597153	-0.0082851	0.930714	0.0699655	0.446413	-0.111854	0.176812
AIP	0.0515265	0.599823	0.0090863	0.979386	0.237181	0.0147007	0.00636557	0.982315	0.0606127	0.537539	0.288707	0.00260597	0.057892	0.551874
AJAP1	-0.809397	3.85938e-05	0.0514365	0.936851	0.24303	0.249292	-0.275863	0.499518	-0.757961	0.000109224	-0.566367	0.00433973	-1.08526	1.12298e-07
AJM1	-0.416555	0.00206037	0.136397	0.655977	0.333528	0.0186073	0.0382467	0.920359	-0.280158	0.0385085	-0.0830268	0.593094	-0.378308	0.00477957
AJUBA	0.37125	0.000330322	-0.0647183	0.816667	-0.231934	0.031354	-0.00130094	0.995992	0.306532	0.00283844	0.139316	0.205048	0.369949	0.000321463
AK1	-0.788091	1.86043e-07	0.0535102	0.906204	0.352081	0.0179092	0.10259	0.760346	-0.734581	9.21213e-07	-0.43601	0.00295556	-0.685501	3.1453e-06
AK2	0.384847	7.8553e-10	0.0214127	0.904628	0.00110919	0.988287	0.0967627	0.390598	0.406259	1.71245e-10	0.385956	1.18156e-09	0.481609	5.0316e-13
AK3	-0.0916984	0.230172	0.147755	0.245118	0.258557	0.00107231	0.0882323	0.595502	0.0560564	0.478048	0.166858	0.033108	-0.00346613	0.967529
AK3P3	-0.544471	0.0112028	0.108178	0.865888	0.0711352	0.789498	-0.188066	0.707132	-0.436293	0.0435733	-0.473335	0.0351548	-0.732536	0.000682237
AK4	-0.315901	0.00741839	0.100275	0.729157	0.462628	0.000226391	-0.14275	0.584633	-0.215626	0.0701791	0.146727	0.251883	-0.458651	0.000125705
AK6	-0.0377001	0.715842	0.120963	0.536035	0.132823	0.201777	0.0155405	0.954533	0.0832631	0.402247	0.0951233	0.365667	-0.0221597	0.832899
AK7	-1.36669	3.46763e-11	-0.163659	0.699707	-0.56855	0.0024805	-0.225701	0.566554	-1.53034	8.96763e-13	-1.93524	2.28003e-16	-1.59239	1.61433e-13
AK8	-1.21535	1.17448e-08	-0.046838	0.945606	-0.557856	0.00637695	-0.0925987	0.84972	-1.26218	4.67215e-09	-1.7732	1.49915e-13	-1.30795	1.37128e-09
AK9	-0.784739	6.51756e-11	-0.0439193	0.893527	-0.201842	0.0702764	-0.0725444	0.771106	-0.828659	1.25074e-11	-0.986582	4.32498e-14	-0.857284	2.98602e-12
AKAP1	-0.000437092	0.996049	-0.0345103	0.866067	0.172214	0.0169844	-0.165789	0.155387	-0.0349474	0.636291	0.171777	0.0160032	-0.166226	0.0147111
AKAP10	0.389695	4.19693e-06	-0.00269644	0.991318	-0.203745	0.0170255	-0.0527361	0.785898	0.386998	5.017e-06	0.185949	0.0282165	0.336959	4.69413e-05
AKAP11	-0.0723252	0.720395	0.0600391	0.921994	0.124346	0.566017	-0.164792	0.70225	-0.0122862	0.954141	0.052021	0.820378	-0.237117	0.206018
AKAP12	0.528685	0.0136606	-0.535311	0.102777	-0.777789	0.000610655	-0.274904	0.560795	-0.00662571	0.978184	-0.249105	0.287656	0.253781	0.243713
AKAP13	0.21662	0.000847831	-0.146214	0.154289	-0.0801355	0.259544	-0.0872319	0.532121	0.0704064	0.289398	0.136485	0.0429609	0.129389	0.0435712
AKAP14	-2.1258	6.88972e-16	0.141179	0.794165	0.274127	0.222825	-0.0403249	0.945076	-1.98462	1.07712e-14	-1.85167	1.98992e-13	-2.16612	2.40759e-16
AKAP17A	0.583612	3.71984e-12	-0.0375757	0.856437	-0.168069	0.0250396	-0.0114155	0.955435	0.546036	3.47066e-11	0.415542	1.04754e-07	0.572196	5.59359e-12
AKAP2	1.72711	5.75047e-11	-0.295727	0.529176	-1.07548	1.42871e-05	-0.158336	0.772164	1.43138	1.27526e-08	0.651625	0.00614758	1.56877	8.3432e-10
AKAP3	0.133246	0.273114	-0.0317929	0.937159	-0.683047	2.48196e-07	0.00023201	0.999561	0.101453	0.413548	-0.549801	1.28211e-05	0.133478	0.268779
AKAP5	1.16513	5.24062e-07	-0.188734	0.723258	-0.691151	0.00269644	-0.143997	0.784062	0.976398	1.68163e-05	0.473982	0.0386175	1.02114	6.56161e-06
AKAP6	-1.18621	2.44757e-08	-0.0936568	0.875761	-0.507145	0.0136368	-0.564159	0.0667969	-1.27987	3.61552e-09	-1.69335	9.1983e-13	-1.75037	1.38832e-13
AKAP7	2.23869	1.45052e-14	-0.178578	0.766057	-1.23733	1.41213e-06	0.169589	0.759964	2.06012	3.19962e-13	1.00136	4.70895e-05	2.40828	6.47438e-16
AKAP8	0.175686	0.000328404	-0.00161346	0.991318	-0.0311697	0.582025	0.00155631	0.990573	0.174073	0.00038399	0.144517	0.00388912	0.177243	0.000272285
AKAP8L	0.464751	2.07754e-09	-0.0629848	0.706416	-0.168966	0.0214271	-0.00488691	0.981906	0.401766	9.31632e-08	0.295785	5.63669e-05	0.459864	2.35381e-09
AKAP9	-0.412653	0.000440227	-0.133068	0.588532	-0.0789539	0.560101	-0.117806	0.655325	-0.545721	6.47871e-06	-0.491607	5.70073e-05	-0.530459	9.36269e-06
AKIP1	0.663936	6.11717e-11	-0.16526	0.281968	-0.43359	6.26105e-06	0.0119707	0.9628	0.498676	1.49316e-07	0.230346	0.0120328	0.675907	2.79084e-11
AKIRIN1	0.0977098	0.0514902	-0.0551	0.614921	-0.161474	0.00218506	-0.04652	0.688595	0.0426098	0.415502	-0.0637647	0.239674	0.0511897	0.317373
AKIRIN2	0.677563	9.49686e-17	-0.02663	0.890278	-0.336326	9.17678e-07	0.105742	0.402492	0.650933	5.31343e-16	0.341237	4.31417e-07	0.783306	1.52409e-19
AKNA	-0.215594	0.0523057	-0.116971	0.636518	-0.731526	9.28429e-09	-0.190606	0.394434	-0.332565	0.00287638	-0.94712	1.48142e-12	-0.406201	0.000280841
AKR1A1	-0.42985	4.00877e-05	0.0292632	0.93023	0.269879	0.0117651	-0.0310423	0.914409	-0.400587	0.000121096	-0.159972	0.141592	-0.460893	1.13926e-05
AKR1B1	-1.1566	1.30585e-05	-0.687331	0.0730534	0.108038	0.73069	-0.112203	0.863656	-1.84393	2.50573e-10	-1.04856	9.82099e-05	-1.2688	2.12734e-06
AKR1B10	-1.12606	2.78791e-06	0.473209	0.217433	2.55129	9.35834e-16	0.345924	0.476503	-0.652853	0.00464613	1.42522	2.29107e-08	-0.780138	0.000709714
AKR1B10P1	-0.348885	0.0994846	0.327164	0.411774	1.17874	4.51843e-07	0.114556	0.824445	-0.0217205	0.929002	0.829859	0.00016591	-0.234329	0.273753
AKR1C1	-1.26302	5.67938e-10	0.378937	0.208049	2.31832	4.87408e-18	0.329691	0.358308	-0.884087	3.17778e-06	1.0553	1.09108e-07	-0.933333	9.24241e-07
AKR1C2	-0.997989	3.4881e-09	0.407572	0.0739534	2.13129	1.25447e-19	0.287131	0.336089	-0.590417	0.00015146	1.1333	1.45364e-10	-0.710858	6.7335e-06
AKR1C3	-0.79093	6.78507e-09	0.240951	0.255101	1.39988	5.47458e-16	0.234667	0.332348	-0.549979	1.84468e-05	0.608952	4.32268e-06	-0.556264	1.30638e-05
AKR1C7P	-0.607697	0.000724917	-0.0338372	0.959662	0.518367	0.00562109	-0.210788	0.594745	-0.641534	0.000391759	-0.0893301	0.670419	-0.818485	8.60362e-06
AKR1E2	0.02669	0.883353	-0.0967206	0.829287	0.0949731	0.617601	0.228244	0.506512	-0.0700306	0.68808	0.121663	0.504017	0.254934	0.11285
AKR7A2	-0.820727	3.21061e-10	0.112671	0.672751	0.303979	0.0121664	0.121816	0.640944	-0.708056	1.94895e-08	-0.516749	2.3052e-05	-0.698912	2.19125e-08
AKR7A3	-0.44127	0.0154822	0.0402472	0.951655	0.230682	0.25128	-0.184822	0.655916	-0.401023	0.0285849	-0.210588	0.290558	-0.626092	0.000633136
AKR7L	-0.388939	0.0833788	0.0623569	0.933651	0.427348	0.0731146	0.0819381	0.89424	-0.326582	0.151554	0.0384092	0.892449	-0.307001	0.173055
AKT1	0.348482	5.0448e-13	-0.0657156	0.374972	-0.14615	0.00056871	0.030354	0.749176	0.282766	4.37579e-10	0.202332	2.5032e-06	0.378836	1.90365e-14
AKT1S1	-0.251899	0.00073245	0.149474	0.229983	0.373697	3.62156e-06	0.0605456	0.722958	-0.102425	0.174615	0.121798	0.121133	-0.191353	0.00923008
AKT2	0.148721	3.05265e-05	-0.0285225	0.740554	0.0040932	0.930367	0.0389123	0.617558	0.120199	0.000624633	0.152814	3.05293e-05	0.187633	3.25242e-07
AKT3	-0.104164	0.514716	-0.305383	0.234162	-0.613035	0.00015376	-0.105368	0.771166	-0.409547	0.00726519	-0.717199	9.13403e-06	-0.209532	0.171302
AKTIP	-0.263176	4.63045e-05	0.0945632	0.434925	0.259188	0.000115927	0.218307	0.0181819	-0.168613	0.00764256	-0.00398772	0.960838	-0.0448686	0.49443
ALAD	-0.253312	5.18443e-05	0.0629222	0.649451	0.400151	1.10714e-08	0.064254	0.642284	-0.190389	0.00198534	0.146839	0.020978	-0.189058	0.0019335
ALAS1	0.308286	1.87415e-08	0.206779	0.00217665	0.188369	0.00040542	0.0958195	0.326576	0.515065	1.25759e-15	0.496655	7.72162e-15	0.404106	5.60021e-12
ALCAM	-0.359572	0.00066525	-0.16384	0.406658	0.26445	0.0162861	-0.145649	0.517505	-0.523412	1.99071e-06	-0.0951218	0.414778	-0.505221	3.41427e-06
ALDH16A1	-0.175222	0.0224301	0.178327	0.141719	0.280795	0.000551755	0.1135	0.490093	0.00310552	0.97217	0.105573	0.202022	-0.0617222	0.43847
ALDH18A1	-0.21807	0.0150292	0.173668	0.25771	0.5223	1.95278e-07	-0.0654085	0.759225	-0.0444023	0.646628	0.30423	0.00110978	-0.283478	0.00158707
ALDH1A1	-1.12374	2.28531e-15	0.015201	0.97204	0.988029	2.04904e-12	-0.0587977	0.831389	-1.10853	4.26648e-15	-0.135706	0.263492	-1.18253	2.24591e-16
ALDH1A2	-0.59615	0.00102188	0.0414772	0.949092	-0.0106239	0.965459	0.164431	0.692897	-0.554673	0.00225302	-0.606774	0.00119258	-0.431719	0.0159059
ALDH1A3	-0.443421	0.00104195	-0.360266	0.072781	-0.0820808	0.604507	-0.184648	0.524336	-0.803687	3.678e-08	-0.525501	0.000184342	-0.628069	6.20439e-06
ALDH1B1	-0.341763	0.00549944	-0.257778	0.207356	0.0125506	0.940401	-0.190617	0.461408	-0.599541	3.32635e-06	-0.329212	0.0099464	-0.53238	2.4139e-05
ALDH1L1	-0.331687	0.0101855	0.0887439	0.794958	0.229826	0.0969726	-0.20555	0.443764	-0.242943	0.0621004	-0.101861	0.48471	-0.537237	4.58378e-05
ALDH1L2	1.29498	0.000128178	0.142988	0.889571	-1.39452	8.55571e-05	0.419273	0.566618	1.43797	2.70578e-05	-0.0995375	0.807824	1.71425	8.84383e-07
ALDH2	-0.406244	2.94532e-07	-0.018831	0.942482	0.604966	2.69334e-11	-0.181933	0.148975	-0.425075	1.11878e-07	0.198722	0.0100329	-0.588177	9.62288e-12
ALDH3A1	-2.25521	6.26519e-13	0.606457	0.141251	1.75153	5.91291e-09	0.475807	0.357181	-1.64875	9.35419e-09	-0.503681	0.0666364	-1.7794	9.18083e-10
ALDH3A2	-0.354576	4.7462e-06	-0.0491346	0.804748	0.620586	1.22019e-11	0.00827607	0.96942	-0.403711	3.54855e-07	0.26601	0.000592432	-0.3463	6.67903e-06
ALDH3B1	-1.1829	2.26133e-11	0.00206465	0.996621	-0.214532	0.197854	-0.292997	0.323084	-1.18084	2.59712e-11	-1.39744	1.22059e-13	-1.4759	7.74055e-15
ALDH3B2	0.410972	0.00168355	0.392962	0.037157	0.291892	0.0338512	0.541353	0.00278313	0.803934	1.69248e-08	0.702864	6.31039e-07	0.952325	1.15077e-10
ALDH4A1	-0.654637	6.50363e-08	0.107523	0.68231	0.531925	1.19635e-05	0.118233	0.641928	-0.547115	3.29638e-06	-0.122713	0.318396	-0.536404	4.15895e-06
ALDH5A1	-0.841722	2.4752e-10	0.188373	0.389665	0.711324	7.321e-08	0.0109286	0.975254	-0.653349	2.00116e-07	-0.130398	0.309783	-0.830793	2.97902e-10
ALDH6A1	-0.110632	0.30418	-0.0479626	0.882108	0.224607	0.042711	-0.191331	0.355588	-0.158595	0.136534	0.113975	0.320506	-0.301964	0.00379396
ALDH7A1	-0.962349	1.1261e-16	0.0849008	0.68231	0.638267	8.91809e-10	0.0782122	0.704261	-0.877448	4.71785e-15	-0.324081	0.000452461	-0.884137	2.39267e-15
ALDH8A1	0.394217	0.0615589	-0.131908	0.81924	-0.0647031	0.805803	-0.211308	0.658402	0.262309	0.22358	0.329514	0.142308	0.182909	0.398568
ALDH9A1	-0.548492	1.39223e-14	0.012749	0.951053	0.178792	0.00291072	-0.0245921	0.867048	-0.535743	3.61459e-14	-0.3697	7.57157e-09	-0.573084	1.96074e-15
ALDOA	0.458214	3.9737e-07	0.0567212	0.801566	0.0977213	0.30049	0.184246	0.235053	0.514935	2.75642e-08	0.555935	5.76241e-09	0.64246	4.18365e-11
ALDOB	0.683675	0.000109375	0.251437	0.457587	0.0705513	0.740253	-0.104891	0.804173	0.935112	4.07103e-07	0.754226	3.73736e-05	0.578784	0.00086142
ALDOC	-0.263295	0.0466351	0.446582	0.0158042	0.395152	0.00444011	0.277394	0.259557	0.183287	0.174157	0.131857	0.366505	0.0140989	0.924022
ALG1	-0.0407311	0.509734	0.0539817	0.698919	0.168873	0.00624266	0.0713652	0.583336	0.0132506	0.841041	0.128142	0.0371286	0.030634	0.624393
ALG10	0.466666	0.00063308	-0.0620841	0.881568	-0.185823	0.209628	-0.147004	0.628707	0.404582	0.0029449	0.280844	0.0474694	0.319662	0.0173309
ALG10B	0.218648	0.170991	0.0472397	0.927618	0.0482668	0.80662	-0.109356	0.770975	0.265888	0.0955135	0.266915	0.110509	0.109292	0.506867
ALG11	0.455443	9.48441e-05	-0.0797563	0.791204	-0.152049	0.225903	-0.0883279	0.74131	0.375687	0.00114125	0.303394	0.0105525	0.367115	0.0013284
ALG12	0.0593067	0.358018	-0.0956032	0.420761	0.0751911	0.275391	-0.0174823	0.92153	-0.0362965	0.586974	0.134498	0.0393594	0.0418244	0.522209
ALG13	-0.0104014	0.926668	0.0395765	0.900589	0.133267	0.220306	-0.0882173	0.701321	0.0291751	0.790293	0.122866	0.253044	-0.0986187	0.330894
ALG14	-0.571544	1.77193e-07	0.16387	0.390678	0.527727	2.45003e-06	0.0868376	0.715318	-0.407674	9.91493e-05	-0.0438171	0.719803	-0.484706	4.88356e-06
ALG1L	0.588009	2.81294e-05	0.0949119	0.792239	-0.284279	0.0494179	-0.0385414	0.92059	0.682921	1.96552e-06	0.30373	0.0332123	0.549468	7.49293e-05
ALG1L2	0.364311	0.10529	0.206935	0.696884	0.239722	0.337483	0.0713784	0.909709	0.571246	0.0107739	0.604033	0.00916237	0.43569	0.050165
ALG1L8P	-1.37963	5.51524e-08	0.343984	0.45185	0.0135604	0.965996	0.105857	0.85897	-1.03564	2.03675e-05	-1.36607	1.15698e-07	-1.27377	3.1089e-07
ALG2	0.241771	0.000168354	0.0537424	0.728568	-0.0562357	0.434291	-0.0272674	0.866337	0.295513	7.16914e-06	0.185535	0.00462338	0.214503	0.000715186
ALG3	0.0715263	0.442804	0.109557	0.555227	0.371656	9.68016e-05	0.0980525	0.625036	0.181084	0.0436095	0.443182	3.4277e-06	0.169579	0.0564377
ALG5	0.437164	4.68928e-08	-0.0692619	0.691957	-0.0843685	0.304403	0.0386975	0.83213	0.367902	2.22279e-06	0.352796	7.46919e-06	0.475862	4.54914e-09
ALG6	-0.10272	0.371101	0.0497604	0.884587	0.240498	0.0402312	-0.041889	0.889043	-0.0529598	0.65853	0.137778	0.252057	-0.144609	0.196446
ALG8	-0.210833	0.00169819	0.108963	0.379164	0.508449	1.95278e-10	0.0475912	0.764736	-0.10187	0.134141	0.297615	2.5789e-05	-0.163242	0.01403
ALG9	0.00208385	0.982696	0.076171	0.684476	0.050769	0.589851	0.0267259	0.905364	0.0782549	0.345899	0.0528529	0.565103	0.0288097	0.740112
ALKAL1	-0.139741	0.482178	0.286674	0.42924	0.147028	0.500997	0.0664316	0.900698	0.146933	0.461208	0.00728719	0.976574	-0.073309	0.720067
ALKAL2	0.315861	0.219123	-0.0131117	0.987386	-0.322329	0.246337	0.0848125	0.904636	0.302749	0.242837	-0.00646827	0.984857	0.400673	0.113031
ALKBH2	-0.0561221	0.614201	0.142945	0.491552	0.318847	0.0036773	0.0383485	0.893855	0.0868233	0.427359	0.262725	0.0155443	-0.0177736	0.878225
ALKBH3	0.0258663	0.69746	0.0561652	0.699707	0.0485212	0.491182	0.0751389	0.57894	0.0820315	0.190415	0.0743875	0.264474	0.101005	0.0996945
ALKBH4	-0.107132	0.263494	-0.00777436	0.981433	0.0383579	0.738541	0.0274839	0.918019	-0.114906	0.231682	-0.0687739	0.51815	-0.079648	0.409667
ALKBH5	-0.249768	7.46737e-07	0.0508851	0.631414	0.0433919	0.423761	-0.0175578	0.893776	-0.198883	5.02067e-05	-0.206376	4.13996e-05	-0.267326	1.47984e-07
ALKBH6	0.0114537	0.948619	-0.0393526	0.941677	0.208839	0.216482	0.187384	0.58221	-0.0278989	0.873803	0.220292	0.182937	0.198838	0.201484
ALKBH7	-0.507548	0.000144941	-0.00122175	0.997958	0.420944	0.00229412	0.105643	0.728667	-0.50877	0.000146241	-0.0866037	0.565485	-0.401905	0.00214954
ALKBH8	-0.0549302	0.615193	-0.0873746	0.728131	-0.109033	0.342386	-0.230347	0.209075	-0.142305	0.173641	-0.163963	0.133525	-0.285277	0.00516149
ALMS1	-0.676038	1.777e-06	-0.0763498	0.842614	-0.0233176	0.895511	-0.00785023	0.984497	-0.752388	1.91663e-07	-0.699355	1.42991e-06	-0.683888	1.27739e-06
ALMS1-IT1	-0.0353124	0.89345	0.232535	0.660798	0.0675082	0.816906	0.268038	0.60342	0.197222	0.416314	0.0321958	0.912701	0.232726	0.327602
ALMS1P1	1.69755	3.34017e-09	-0.140548	0.850508	-1.67444	1.5896e-08	0.104168	0.878077	1.557	3.37881e-08	0.0231097	0.945307	1.80172	5.30354e-10
ALOX12	0.576821	0.00913649	0.18259	0.73879	-0.264895	0.279507	0.0648988	0.918045	0.759411	0.000706568	0.311926	0.190333	0.641719	0.00363373
ALOX12-AS1	-0.192297	0.125882	0.133429	0.627578	0.222846	0.0947313	0.036415	0.918227	-0.0588684	0.662084	0.0305489	0.842928	-0.155882	0.215892
ALOX12B	0.150981	0.597617	0.282489	0.639472	0.307869	0.303131	0.170688	0.791879	0.43347	0.112522	0.45885	0.108124	0.321669	0.23873
ALOX12P2	0.642409	2.06256e-07	0.0129721	0.975084	-0.151972	0.232373	-4.48208e-05	0.999793	0.655381	1.39468e-07	0.490437	5.70538e-05	0.642364	1.83611e-07
ALOX15	-2.19996	1.22083e-15	-0.296709	0.487229	0.482787	0.0335676	-0.207653	0.673683	-2.49667	8.60592e-18	-1.71717	1.42889e-11	-2.40761	2.35738e-17
ALOX15B	1.25319	1.55265e-06	0.127134	0.862172	-0.482713	0.0677887	0.319272	0.557118	1.38033	2.07719e-07	0.77048	0.00276535	1.57247	6.81752e-09
ALOX15P1	-0.138079	0.435341	-0.12381	0.778563	-0.258474	0.16018	-0.0408394	0.932931	-0.26189	0.128508	-0.396554	0.0248757	-0.178919	0.301037
ALOX5	0.297373	0.0108241	0.149681	0.531501	0.297896	0.015353	0.0205766	0.950986	0.447054	0.000175194	0.595269	2.07047e-06	0.31795	0.00622452
ALOX5AP	-0.150905	0.540179	-0.567919	0.117007	-0.650353	0.00805423	-0.381274	0.428678	-0.718824	0.00225223	-0.801258	0.000964225	-0.53218	0.021835
ALOXE3	0.481959	0.0594004	-0.184604	0.781987	-0.277598	0.329912	0.262405	0.650305	0.297355	0.257284	0.204361	0.476982	0.744364	0.00339793
ALPK1	0.795814	3.02371e-11	-0.0484686	0.879686	-0.393355	0.000341548	-0.00474356	0.987418	0.747346	2.24397e-10	0.402459	0.00020324	0.791071	2.93373e-11
ALPK2	-0.251575	0.322352	-0.686358	0.0600695	-1.0989	3.47084e-05	-0.552769	0.21209	-0.937933	0.000193863	-1.35047	4.71605e-07	-0.804344	0.001138
ALPK3	-0.644051	2.87375e-08	0.190656	0.315347	0.364381	0.00122247	-0.0217628	0.942999	-0.453395	3.77929e-05	-0.27967	0.0116935	-0.665814	1.05614e-08
ALPL	0.396018	0.0389228	0.526879	0.0643436	-0.169921	0.436597	0.178168	0.688518	0.922896	4.17587e-06	0.226097	0.279421	0.574186	0.00267473
ALS2	-0.116944	0.13178	-0.0175856	0.949208	-0.0607589	0.49178	-0.0752444	0.668791	-0.134529	0.0831395	-0.177703	0.0267236	-0.192188	0.011883
ALS2CL	0.107846	0.163561	0.000585129	0.998583	0.0656393	0.452028	0.0589772	0.741909	0.108431	0.16431	0.173485	0.0298112	0.166823	0.0281472
ALS2CR12	-1.06479	3.19725e-09	-0.0976612	0.829725	-0.679836	9.01755e-05	-0.338077	0.265968	-1.16245	2.83698e-10	-1.74463	3.12693e-16	-1.40287	4.87585e-13
ALX1	0.197703	0.378788	-0.392337	0.304514	-0.480149	0.0360289	-0.204465	0.682794	-0.194634	0.388766	-0.282446	0.227635	-0.00676246	0.978249
ALYREF	-0.051218	0.593296	0.0798132	0.714728	0.103363	0.302533	0.0767188	0.715318	0.0285952	0.774486	0.0521453	0.618644	0.0255008	0.797837
AMACR	-0.158867	0.0847916	0.0146467	0.966024	-0.0258616	0.822667	-0.0573815	0.795801	-0.14422	0.12153	-0.184728	0.0550186	-0.216248	0.0176337
AMBRA1	0.711555	3.68784e-15	-0.115883	0.384082	-0.435654	6.75046e-08	-0.0168095	0.934592	0.595672	2.40975e-12	0.2759	0.000226894	0.694745	6.83608e-15
AMD1	0.247758	0.03167	0.0336807	0.929752	0.139158	0.275231	-0.00717669	0.984061	0.281439	0.0150232	0.386915	0.00124784	0.240581	0.0360669
AMDHD1	-0.0286882	0.890504	-0.153153	0.73527	-0.276016	0.166034	0.132863	0.760624	-0.181841	0.339383	-0.304704	0.117755	0.104175	0.591606
AMDHD2	-0.273413	0.0036398	-0.0562157	0.830988	0.231305	0.0192253	-0.103299	0.625036	-0.329629	0.000535749	-0.0421077	0.705532	-0.376712	7.91555e-05
AMER1	1.39481	7.48783e-17	-0.268094	0.203879	-0.73705	2.11924e-07	0.00391431	0.990786	1.12672	2.78557e-13	0.65776	1.52866e-06	1.39872	4.86454e-17
AMFR	-0.103607	0.0294349	-0.023667	0.867429	0.116448	0.0201202	-0.0578848	0.582341	-0.127274	0.00772395	0.0128409	0.827067	-0.161492	0.000722689
AMH	-0.0717619	0.79164	0.284235	0.582828	0.0821946	0.78668	0.257009	0.643379	0.212473	0.407398	0.0104327	0.973913	0.185247	0.467858
AMIGO1	-0.46105	4.93564e-05	0.241508	0.180741	0.860831	1.04841e-10	-0.126455	0.60995	-0.219542	0.048936	0.399781	0.000535615	-0.587505	5.05494e-07
AMIGO2	-0.0198813	0.913067	-0.330858	0.212464	-0.624848	0.000227702	-0.201067	0.566985	-0.350739	0.028473	-0.644729	0.000116171	-0.220948	0.1691
AMMECR1	0.00205242	0.981951	0.0770337	0.646291	0.116139	0.14891	0.0295025	0.880081	0.0790861	0.302763	0.118192	0.135717	0.0315549	0.693149
AMMECR1L	0.0501815	0.536788	-0.0266841	0.914948	-0.0107862	0.916408	-0.0430868	0.820855	0.0234974	0.782895	0.0393954	0.664324	0.00709476	0.934068
AMN	0.721448	1.72771e-09	-0.0342466	0.923131	-0.00234224	0.987431	0.0954745	0.702543	0.687202	6.98497e-09	0.719106	3.07834e-09	0.816923	3.54109e-11
AMN1	-0.297532	0.000227443	0.100388	0.539187	0.306064	0.000287426	0.0989733	0.572296	-0.197143	0.0134101	0.00853176	0.933874	-0.198558	0.0119734
AMOT	-0.372327	0.00410493	0.207576	0.390678	0.411029	0.00257297	-0.14497	0.618536	-0.164751	0.214296	0.0387015	0.808828	-0.517297	8.54589e-05
AMOTL1	-0.176086	0.112453	-0.0977779	0.713282	0.0508578	0.702146	0.0492083	0.860412	-0.273864	0.0131051	-0.125228	0.298028	-0.126877	0.256386
AMOTL2	0.900739	4.64311e-14	-0.338427	0.0117978	-0.566468	1.76044e-07	-0.0580022	0.807159	0.562312	7.81445e-08	0.334272	0.00090895	0.842737	3.92388e-13
AMPD2	-0.432423	3.73966e-05	0.0811301	0.751994	0.346411	0.0012946	-0.0877094	0.713399	-0.351293	0.000681043	-0.0860114	0.451978	-0.520132	1.18454e-06
AMPD3	0.311153	6.40197e-06	-0.107331	0.384334	-0.367874	5.4992e-07	-0.080285	0.583995	0.203822	0.00227935	-0.0567216	0.444194	0.230868	0.000531096
AMPH	0.331921	0.104483	-0.0940187	0.880712	-0.344831	0.114432	-0.171265	0.716347	0.237902	0.254688	-0.0129106	0.960838	0.160655	0.445953
AMT	-0.407271	0.00350118	0.182219	0.519273	0.354697	0.01548	0.0461373	0.905537	-0.225052	0.111027	-0.0525747	0.754333	-0.361134	0.00909552
AMTN	-0.180569	0.479938	-0.904137	0.00691339	-1.80595	4.1147e-10	-0.929949	0.00703648	-1.08471	1.72207e-05	-1.98652	7.14554e-12	-1.11052	9.86388e-06
AMY1B	-0.495579	0.0676307	0.0418964	0.967353	-0.402478	0.170979	0.0814183	0.915584	-0.453683	0.0972594	-0.898057	0.00138256	-0.414161	0.126642
AMY2B	0.0950958	0.568935	0.0990701	0.818891	0.273802	0.105772	0.220814	0.514665	0.194166	0.229875	0.368898	0.0247895	0.31591	0.0440673
AMZ1	0.480057	0.0446137	0.347309	0.455395	-0.370866	0.15184	0.200442	0.717102	0.827366	0.000626895	0.109191	0.699456	0.680499	0.004227
AMZ2	-0.543271	1.10656e-12	0.0968672	0.428671	0.139268	0.039324	0.0389499	0.802017	-0.446404	5.81045e-10	-0.404003	1.417e-08	-0.504321	1.03032e-11
AMZ2P1	-0.542771	2.6265e-05	-0.0520533	0.895014	0.035157	0.823504	-0.266496	0.248461	-0.594825	5.54167e-06	-0.507614	0.00011418	-0.809268	4.21102e-09
ANAPC1	-0.392508	0.000661394	0.143487	0.542189	0.315581	0.00852519	-0.0760945	0.78237	-0.249021	0.0298387	-0.0769272	0.556828	-0.468603	5.61112e-05
ANAPC10	0.288268	0.000296353	0.035406	0.884053	-0.100114	0.24746	0.116184	0.489506	0.323674	6.01448e-05	0.188153	0.0215208	0.404452	9.53078e-07
ANAPC11	-0.195207	0.078298	0.0835335	0.768736	0.202073	0.087076	0.200803	0.358596	-0.111674	0.329085	0.00686611	0.961496	0.00559591	0.964416
ANAPC13	0.072261	0.186284	0.0738841	0.490227	0.100037	0.0823428	0.0773483	0.501345	0.146145	0.00687794	0.172298	0.00206064	0.149609	0.00526732
ANAPC15	-0.687481	8.87617e-10	0.0871026	0.72043	0.473924	1.20687e-05	0.167921	0.412008	-0.600379	3.46702e-08	-0.213558	0.0414904	-0.519561	7.95673e-07
ANAPC16	-0.361276	2.68821e-08	0.0957408	0.390678	0.218659	0.000545683	0.0286161	0.84874	-0.265535	1.78355e-05	-0.142617	0.0220049	-0.33266	1.71331e-07
ANAPC2	0.0845537	0.156838	0.0171063	0.930065	-0.0291073	0.680136	0.0687639	0.598288	0.10166	0.0882865	0.0554463	0.397888	0.153318	0.00896225
ANAPC4	-0.247766	0.000668298	0.0249444	0.914948	-0.0425925	0.617986	-0.0650082	0.697083	-0.222822	0.00217347	-0.290359	0.000123592	-0.312775	2.31632e-05
ANAPC5	-0.438054	8.35797e-16	0.104353	0.110034	0.161185	0.000339292	0.0757885	0.370503	-0.333701	1.5526e-11	-0.276868	5.97473e-09	-0.362265	7.26009e-13
ANAPC7	-0.0205967	0.692886	0.11409	0.129724	0.175167	0.000570946	0.0833846	0.390405	0.0934935	0.0534049	0.15457	0.00194771	0.0627879	0.195746
ANG	-0.839468	2.93281e-07	0.0875873	0.841314	0.757347	5.81119e-06	0.0267977	0.951497	-0.75188	3.05604e-06	-0.0821203	0.648094	-0.81267	5.34083e-07
ANGEL1	-0.497867	2.28015e-06	0.188911	0.278565	0.521014	2.22779e-06	-0.0874678	0.709149	-0.308956	0.00228026	0.0231461	0.852638	-0.585335	5.8543e-08
ANGEL2	0.258491	0.00759099	-0.048358	0.867111	-0.139086	0.187992	-0.0480822	0.841116	0.210133	0.0307371	0.119405	0.256316	0.210409	0.0288802
ANGPT1	0.859743	0.000549751	-0.235565	0.682584	-0.969364	0.000212856	-0.0475679	0.946479	0.624178	0.0114658	-0.10962	0.707223	0.812175	0.000990873
ANGPTL1	3.1266	1.4778e-19	0.119365	0.873604	-1.52198	4.70934e-08	0.265722	0.632314	3.24597	3.42528e-20	1.60462	6.27477e-09	3.39232	2.94441e-21
ANGPTL2	0.840341	0.00437395	-0.293659	0.662653	-0.615555	0.0487571	-0.0330771	0.969004	0.546681	0.0657668	0.224786	0.500749	0.807264	0.00589291
ANGPTL4	1.87571	3.87279e-14	1.28586	1.02916e-06	0.574922	0.00644231	1.59584	2.35689e-09	3.16157	8.4398e-24	2.45063	1.95442e-18	3.47155	5.82745e-26
ANGPTL5	-0.656541	0.00129283	0.141687	0.790736	-0.0444573	0.86428	-0.246781	0.58221	-0.514854	0.0113699	-0.700998	0.000887235	-0.903322	1.47327e-05
ANGPTL6	1.30908	4.65658e-09	-0.143661	0.787343	-0.587746	0.0057199	0.340823	0.409424	1.16542	9.42213e-08	0.721335	0.000622745	1.6499	3.58924e-12
ANK1	-0.824876	8.73882e-05	-0.230892	0.604162	-0.152314	0.522772	-0.053207	0.927748	-1.05577	1.20783e-06	-0.97719	8.18555e-06	-0.878083	3.04968e-05
ANK2	0.159573	0.470562	0.240122	0.594111	-0.414132	0.0652613	0.280828	0.541754	0.399695	0.0600595	-0.254559	0.267434	0.440402	0.0358771
ANK3	-0.497889	2.25495e-05	-0.0852362	0.771472	0.169349	0.171991	-0.0738892	0.786566	-0.583126	1.26724e-06	-0.32854	0.00543339	-0.571779	1.61613e-06
ANKAR	0.319941	0.00860378	-0.259005	0.19896	-0.396221	0.00201036	-0.0863361	0.765209	0.0609357	0.642757	-0.0762807	0.587224	0.233605	0.0543549
ANKDD1A	1.04379	1.90459e-11	-0.162892	0.560637	-0.359302	0.0106829	-0.0116711	0.97698	0.880902	3.12313e-09	0.684492	1.9333e-06	1.03212	2.1814e-11
ANKDD1B	-1.13268	1.36737e-09	-0.0028274	0.99584	-0.683879	0.000129041	-0.208184	0.572582	-1.13551	1.34891e-09	-1.81656	2.18912e-16	-1.34086	6.41121e-12
ANKEF1	-0.0964257	0.375975	0.137135	0.520892	-0.207941	0.0629769	-0.0321488	0.913726	0.0407096	0.72285	-0.304367	0.00521106	-0.128575	0.226888
ANKFN1	-1.96028	1.34958e-11	-0.190922	0.765509	-0.774406	0.00305443	-0.524988	0.254361	-2.15121	6.44267e-13	-2.73469	1.28859e-16	-2.48527	2.24518e-15
ANKFY1	1.39129	1.03666e-23	-0.235368	0.0776109	-0.71974	3.34675e-11	-0.00434418	0.986647	1.15592	7.18837e-20	0.671548	9.22775e-11	1.38694	1.03492e-23
ANKH	-0.89466	3.04793e-11	-0.256963	0.173198	0.357324	0.00350496	-0.240043	0.271731	-1.15162	4.9672e-15	-0.537336	1.3714e-05	-1.1347	5.94902e-15
ANKHD1	0.132632	0.157778	-0.13132	0.472581	-0.00292348	0.982521	0.0111393	0.967372	0.00131192	0.990011	0.129709	0.193584	0.143771	0.122076
ANKHD1-EIF4EBP3	0.279184	0.0152031	0.0520293	0.883781	-0.083249	0.533295	-0.0816837	0.76504	0.331213	0.00419643	0.195935	0.108629	0.1975	0.0861217
ANKIB1	1.0051	2.63213e-09	-0.22202	0.453262	-0.611122	0.000163306	-0.115694	0.747879	0.783078	1.12464e-06	0.393976	0.0126815	0.889404	5.37011e-08
ANKK1	-0.0269256	0.869611	-0.0374793	0.940305	-0.455685	0.00278939	-0.122663	0.715331	-0.064405	0.68239	-0.482611	0.00134353	-0.149588	0.312438
ANKLE1	-0.0235585	0.91353	-0.120809	0.816663	0.0548282	0.818804	0.134813	0.765569	-0.144368	0.472052	0.0312696	0.896463	0.111254	0.580463
ANKMY1	-0.772595	6.07323e-10	-0.135588	0.559127	-0.504259	2.46615e-05	-0.155197	0.515843	-0.908182	4.31752e-12	-1.27685	2.14563e-17	-0.927791	1.53061e-12
ANKMY2	0.103993	0.0700045	0.0319405	0.845152	0.0123419	0.867099	-0.0138244	0.932931	0.135934	0.0178311	0.116335	0.0525004	0.0901687	0.115587
ANKRA2	0.156334	0.0109626	0.0624953	0.654817	0.0490196	0.48797	-0.118506	0.320895	0.218829	0.000456181	0.205354	0.00131165	0.0378276	0.559546
ANKRD1	0.402746	0.0566812	-1.14596	3.36245e-05	-1.66631	6.4122e-11	-0.831125	0.00516998	-0.743216	0.000509062	-1.26357	5.49222e-08	-0.428378	0.041197
ANKRD10	0.121665	0.148266	-0.281483	0.0157338	-0.105068	0.2522	-0.208396	0.137478	-0.159818	0.0566665	0.0165973	0.874022	-0.0867308	0.307977
ANKRD10-IT1	0.56624	0.000217873	-0.306476	0.227499	-0.00522279	0.980695	-0.196131	0.551604	0.259764	0.0883535	0.561017	0.000364133	0.370109	0.0135292
ANKRD11	0.0278214	0.629439	-0.0677041	0.542841	-0.120996	0.0337584	0.0178373	0.905537	-0.0398827	0.48392	-0.0931744	0.103055	0.0456586	0.412352
ANKRD12	0.346968	8.3299e-08	-0.0910373	0.428671	-0.103147	0.110675	-0.0478302	0.731248	0.255931	3.611e-05	0.243822	0.000111183	0.299138	1.90635e-06
ANKRD13A	0.186536	0.00535685	-0.0852331	0.535908	-0.112707	0.117878	-0.106743	0.442807	0.101303	0.137053	0.073829	0.31425	0.0797936	0.239949
ANKRD13B	-0.397893	0.000995439	0.0459712	0.9052	0.341501	0.00676771	0.0156098	0.964583	-0.351922	0.00353451	-0.0563922	0.690732	-0.382283	0.00144585
ANKRD13C	-0.149707	0.141758	0.0853316	0.731077	0.1905	0.0767448	-0.0945124	0.684556	-0.0643758	0.549153	0.0407928	0.736092	-0.24422	0.0147893
ANKRD13D	-0.119847	0.0879932	-0.0456587	0.807977	0.08597	0.265026	0.0699886	0.659314	-0.165505	0.018187	-0.0338766	0.681571	-0.049858	0.493664
ANKRD16	-0.699125	3.41367e-09	0.126992	0.570302	0.558644	1.87612e-06	0.101514	0.679712	-0.572133	4.84796e-07	-0.140481	0.223408	-0.597611	1.53737e-07
ANKRD17	0.300029	1.8738e-06	-0.0449247	0.770947	-0.0505385	0.461176	-0.0469007	0.737538	0.255104	3.64193e-05	0.24949	7.54842e-05	0.253128	3.60894e-05
ANKRD18A	-0.575264	1.29503e-05	-0.110215	0.722654	-0.354241	0.00820536	-0.317164	0.141393	-0.685479	4.419e-07	-0.929505	2.51769e-10	-0.892428	4.28855e-10
ANKRD18B	-0.0180563	0.910858	-0.275509	0.253747	-0.418491	0.0048937	-0.0408186	0.919342	-0.293565	0.0391163	-0.436547	0.00295714	-0.0588748	0.699411
ANKRD18CP	-0.542087	0.0151811	0.160963	0.783084	-0.0848086	0.757543	-0.118316	0.830519	-0.381123	0.0917602	-0.626895	0.00685803	-0.660403	0.00303814
ANKRD2	-0.750631	0.000683766	0.0200854	0.98019	0.404039	0.0844392	-0.231662	0.639877	-0.730546	0.000965273	-0.346592	0.137868	-0.982293	1.29868e-05
ANKRD20A11P	0.163903	0.482774	-0.159337	0.784663	-0.738386	0.00163925	-0.00298083	0.995992	0.00456528	0.985733	-0.574483	0.0129474	0.160922	0.487921
ANKRD20A21P	0.237924	0.316083	-0.137278	0.832914	0.0155168	0.960929	-0.113416	0.842891	0.100646	0.687933	0.253441	0.315791	0.124508	0.611679
ANKRD20A5P	0.711038	0.000915344	0.178657	0.733651	-0.441981	0.0501346	0.195339	0.691801	0.889694	4.78508e-05	0.269057	0.243259	0.906377	3.11896e-05
ANKRD20A7P	0.132898	0.59116	-0.163187	0.790095	-0.129869	0.640253	0.00013632	0.999729	-0.0302893	0.910492	0.00302847	0.99192	0.133034	0.589609
ANKRD22	-0.642895	0.000205244	0.688639	0.00268757	0.96604	3.46988e-07	0.761918	0.00099256	0.0457434	0.809873	0.323145	0.0718427	0.119023	0.503661
ANKRD23	-0.45495	0.0120054	-0.0888406	0.870699	0.235943	0.236729	0.0485705	0.925706	-0.54379	0.00287531	-0.219007	0.26681	-0.406379	0.0240993
ANKRD24	-0.362358	0.019054	0.332613	0.190172	0.104392	0.56324	0.133392	0.712734	-0.0297448	0.866003	-0.257966	0.116273	-0.228966	0.140413
ANKRD26	-0.339835	2.36506e-05	-0.00330714	0.989675	-0.0591391	0.51161	0.00303263	0.988435	-0.343142	2.11063e-05	-0.398974	1.93704e-06	-0.336802	2.49559e-05
ANKRD27	-0.0710487	0.211068	0.0496529	0.712716	0.115607	0.0508115	0.00420042	0.980392	-0.0213959	0.726025	0.0445584	0.479056	-0.0668483	0.237451
ANKRD28	-0.137829	0.193834	-0.0451867	0.889248	0.0430432	0.736503	-0.179251	0.395513	-0.183016	0.0826689	-0.0947859	0.415413	-0.31708	0.00233484
ANKRD29	0.215009	0.304484	0.0858407	0.893092	0.174145	0.454028	0.164681	0.727652	0.30085	0.14684	0.389155	0.0694796	0.37969	0.0614364
ANKRD31	-0.462578	0.0100713	0.000120512	0.999838	-0.00780486	0.975453	-0.11864	0.783977	-0.462458	0.0103936	-0.470383	0.0118115	-0.581218	0.00124903
ANKRD33B	0.446204	0.0507367	-0.367796	0.385682	-0.741575	0.00200269	-0.0374596	0.954137	0.0784076	0.754606	-0.295372	0.23072	0.408744	0.0724542
ANKRD34A	0.0659004	0.766363	-0.0344634	0.962676	-0.0369107	0.889061	-0.0571552	0.920504	0.031437	0.892731	0.0289897	0.909249	0.00874522	0.969881
ANKRD34B	-1.12368	1.84052e-06	0.0205717	0.98019	0.145756	0.579309	-0.484798	0.236712	-1.10311	2.7922e-06	-0.977922	3.6584e-05	-1.60848	2.09623e-10
ANKRD35	-0.749942	2.60865e-07	0.0793661	0.838557	0.259145	0.0753039	0.121737	0.700898	-0.670576	2.84989e-06	-0.490797	0.000562194	-0.628205	8.37864e-06
ANKRD36	0.418456	0.0103084	0.264982	0.382437	0.326557	0.0598945	-0.11284	0.772164	0.683438	4.69653e-05	0.745013	1.66926e-05	0.305615	0.0603929
ANKRD36B	0.144425	0.278545	0.218636	0.356965	0.459237	0.000828165	-0.150792	0.60099	0.363061	0.00542223	0.603662	1.22646e-05	-0.00636715	0.965711
ANKRD36BP2	-0.020234	0.932255	0.0328784	0.966369	0.00606085	0.983842	0.0748235	0.89661	0.0126444	0.957968	-0.0141731	0.958477	0.0545895	0.812151
ANKRD36C	0.405726	0.000245012	-0.0235915	0.952911	0.0624361	0.630031	-0.00137604	0.995992	0.382135	0.000544669	0.468163	4.61987e-05	0.40435	0.000238453
ANKRD37	-0.629201	7.59873e-07	-0.140452	0.579103	-0.290211	0.0219976	-0.0685445	0.817049	-0.769653	6.78094e-09	-0.919412	5.90875e-11	-0.697745	6.50137e-08
ANKRD39	-0.525647	4.08826e-05	-0.0104298	0.981433	0.392757	0.00277659	-0.00573272	0.987418	-0.536077	3.129e-05	-0.13289	0.332416	-0.53138	3.14295e-05
ANKRD40	-0.00724579	0.901905	0.0202503	0.903399	0.0504461	0.389253	-0.00919342	0.950848	0.0130045	0.822122	0.0432003	0.457654	-0.0164392	0.772061
ANKRD42	-0.773593	1.113e-11	-0.00117676	0.997043	-0.144766	0.172477	-0.0791989	0.726153	-0.77477	1.14022e-11	-0.918359	4.56537e-14	-0.852792	3.2369e-13
ANKRD44	-0.516554	0.000595281	0.119543	0.748706	0.355048	0.0236103	-0.16528	0.621787	-0.397011	0.00788242	-0.161507	0.322498	-0.681835	9.12135e-06
ANKRD45	-0.491812	0.00989028	-0.227777	0.568486	-0.936335	6.30865e-06	-0.301925	0.447772	-0.719589	0.000214775	-1.42815	1.13684e-10	-0.793737	4.55985e-05
ANKRD46	0.0318919	0.732754	-0.0603938	0.787661	-0.0848697	0.377795	-0.119491	0.515475	-0.0285018	0.761649	-0.0529777	0.590344	-0.087599	0.315481
ANKRD50	-0.0551974	0.729794	-0.00849808	0.985834	-0.0217996	0.911149	-0.117814	0.728667	-0.0636955	0.688507	-0.076997	0.65379	-0.173012	0.243297
ANKRD52	-0.00822947	0.921686	-0.0961368	0.519273	0.0125063	0.89705	-0.0194029	0.926655	-0.104366	0.163695	0.0042768	0.96433	-0.0276323	0.728265
ANKRD53	-0.620431	0.000266985	0.0155729	0.98002	0.0480251	0.819837	0.057876	0.901821	-0.604858	0.000385379	-0.572405	0.00102688	-0.562555	0.000824466
ANKRD54	-0.528622	1.89022e-06	-0.0290215	0.935452	-0.179039	0.115487	-0.00303117	0.991185	-0.557644	6.6692e-07	-0.707662	2.96853e-09	-0.531654	1.53356e-06
ANKRD6	-0.78386	3.02604e-13	-0.00256441	0.992303	0.466763	1.71239e-06	-0.113978	0.560207	-0.786424	2.92749e-13	-0.317097	0.000613547	-0.897838	1.50403e-15
ANKRD65	-0.747655	8.27797e-11	-0.00788153	0.982822	0.236205	0.0256808	0.0729556	0.760076	-0.755537	6.4176e-11	-0.51145	2.10256e-06	-0.6747	1.39324e-09
ANKRD66	-1.96682	1.23021e-12	-0.176946	0.767312	-0.811309	0.000932296	-0.378698	0.428678	-2.14377	6.33033e-14	-2.77813	4.30868e-18	-2.34552	1.48869e-15
ANKRD7	-0.571917	0.0064003	-0.194988	0.695606	-0.0507964	0.849087	-0.0772709	0.893628	-0.766904	0.000322932	-0.622713	0.00419919	-0.649187	0.00194333
ANKRD9	-0.500596	5.81719e-08	0.183232	0.191704	0.609315	1.16892e-09	0.0489469	0.816082	-0.317364	0.000262256	0.108719	0.239977	-0.451649	5.39082e-07
ANKS1A	-0.00887859	0.902503	-0.0921198	0.462624	-0.221467	0.00104086	-0.0919567	0.50044	-0.100998	0.120114	-0.230346	0.00055187	-0.100835	0.115733
ANKS1B	0.0182527	0.94624	-0.28168	0.568461	-0.13109	0.641401	-0.0102109	0.987418	-0.263427	0.278762	-0.112837	0.68561	0.00804185	0.976272
ANKS3	-0.274956	0.00172436	0.0113525	0.973794	0.055931	0.585672	-0.0735867	0.716504	-0.263603	0.00271474	-0.219025	0.015881	-0.348542	8.57971e-05
ANKS6	-0.522275	6.86879e-12	-0.00381468	0.985834	0.460451	1.3404e-09	-0.088893	0.525801	-0.52609	5.78823e-12	-0.0618241	0.390483	-0.611168	2.16112e-14
ANKUB1	-1.38081	2.24262e-09	-0.253603	0.559127	-0.53046	0.0152757	-0.383255	0.349569	-1.63441	1.58053e-11	-1.91127	1.07233e-13	-1.76407	9.06779e-13
ANKZF1	-0.339144	2.11619e-06	0.0716381	0.638734	0.143138	0.0476829	-0.00997034	0.959579	-0.267506	0.000124236	-0.196006	0.00556886	-0.349114	1.06921e-06
ANLN	0.199797	0.31844	0.202279	0.644471	0.186113	0.398204	0.152664	0.736622	0.402077	0.0397869	0.385911	0.0590092	0.352461	0.0694497
ANO1	1.03196	2.42083e-05	-0.0706456	0.928219	-0.712419	0.00427125	0.431025	0.359241	0.961318	7.71846e-05	0.319545	0.211742	1.46299	1.39228e-08
ANO10	-0.432111	6.3303e-09	0.162136	0.124738	0.513967	1.94925e-10	0.157921	0.179264	-0.269974	9.56481e-05	0.0818564	0.265499	-0.27419	6.71832e-05
ANO3	-0.100854	0.612807	0.182128	0.674634	-0.028364	0.909603	0.0221967	0.967394	0.081274	0.689489	-0.129218	0.546336	-0.0786575	0.696221
ANO4	0.265171	0.227548	0.444389	0.217083	0.0755958	0.776556	0.316235	0.4936	0.70956	0.00111862	0.340767	0.138233	0.581407	0.00668906
ANO6	-0.443701	0.000320607	-0.246431	0.229165	-0.0847907	0.550096	-0.197949	0.430061	-0.690132	1.33162e-07	-0.528492	3.85583e-05	-0.64165	5.66619e-07
ANO7	-0.15752	0.388465	-0.106142	0.828769	0.259877	0.174506	-0.227113	0.555207	-0.263662	0.140681	0.102357	0.615722	-0.384633	0.0278437
ANO7L1	2.59229	4.01148e-22	-0.278001	0.413236	-1.65633	5.52132e-13	0.108134	0.805169	2.31429	8.68598e-20	0.935961	1.27212e-06	2.70043	4.82085e-23
ANO8	-0.192213	0.0442323	0.00643332	0.984532	0.296265	0.00315598	-0.08218	0.712734	-0.185779	0.0532704	0.104053	0.319809	-0.274393	0.0039048
ANO9	0.0743752	0.366619	0.053649	0.798818	0.188951	0.0240995	-0.0283375	0.897475	0.128024	0.112425	0.263326	0.00142928	0.0460377	0.584149
ANOS1	-0.414767	0.0574377	-0.787235	0.00871783	-1.04687	9.21181e-06	-0.754222	0.0181819	-1.202	2.47529e-07	-1.46164	2.76053e-09	-1.16899	3.85345e-07
ANOS2P	0.0850886	0.622745	0.0288519	0.962166	-0.18036	0.317715	-0.0442291	0.923931	0.113941	0.506403	-0.0952717	0.611753	0.0408595	0.819015
ANP32A	0.143373	0.00289953	0.0566624	0.572901	0.0489048	0.3653	-0.02309	0.84822	0.200035	5.08586e-05	0.192277	0.000134591	0.120283	0.0117712
ANP32B	0.179239	0.0128951	0.0804496	0.607957	0.115823	0.137566	0.103688	0.500441	0.259688	0.000394252	0.295062	9.80952e-05	0.282926	0.000111008
ANP32E	-0.204233	0.0520968	0.0805548	0.765509	0.267154	0.0155376	-0.125951	0.588461	-0.123678	0.251832	0.0629208	0.604993	-0.330184	0.00164449
ANPEP	-0.216027	0.291334	0.158209	0.752249	0.0229931	0.932016	0.255997	0.559452	-0.0578181	0.793372	-0.193034	0.382102	0.0399699	0.856203
ANTXR1	-1.36504	8.47412e-15	-0.0672455	0.875761	1.03103	5.2197e-10	-0.266471	0.328573	-1.43229	1.44547e-15	-0.334015	0.0223173	-1.63151	4.78558e-18
ANTXR2	0.426305	5.93873e-05	-0.380476	0.00771693	-0.83689	3.37752e-11	-0.192215	0.34454	0.0458293	0.684111	-0.410585	0.000156562	0.23409	0.023093
ANXA1	-0.10725	0.415463	0.351618	0.0600695	0.107358	0.457745	0.671326	6.58558e-05	0.244368	0.0549844	0.000107388	0.999553	0.564076	1.43154e-05
ANXA10	2.89078	1.68883e-18	0.106347	0.886731	-1.0746	3.3115e-05	0.248679	0.648874	2.99712	4.27245e-19	1.81617	8.83641e-11	3.13946	3.44684e-20
ANXA11	0.162761	0.00369733	-0.075079	0.50447	-0.182139	0.00200187	0.0708055	0.566244	0.0876819	0.123119	-0.0193782	0.776677	0.233566	4.34782e-05
ANXA13	-0.378663	0.138487	-0.0618846	0.944657	-0.105536	0.733436	0.0422887	0.952939	-0.440547	0.0848514	-0.484199	0.0690714	-0.336374	0.187697
ANXA2	-0.0943506	0.179427	-0.0513378	0.774515	-0.188986	0.00946904	0.214616	0.0415739	-0.145688	0.0363763	-0.283337	9.79894e-05	0.120265	0.0823762
ANXA2P2	-0.0987263	0.397182	-0.0198209	0.962166	-0.144075	0.243986	0.27309	0.151284	-0.118547	0.307005	-0.242801	0.0387619	0.174363	0.121217
ANXA2R	-0.766401	7.30018e-05	-0.0338859	0.962166	0.18843	0.37629	-0.040805	0.940087	-0.800287	3.91141e-05	-0.577972	0.00319652	-0.807206	2.97327e-05
ANXA3	0.188697	0.0259784	-0.077987	0.698709	-0.418082	5.81119e-06	0.138422	0.428678	0.11071	0.201783	-0.229385	0.00916069	0.327119	0.000140275
ANXA4	0.393304	1.37386e-07	-0.0105067	0.968841	-0.193139	0.00829609	-0.0693455	0.661449	0.382798	2.70091e-07	0.200165	0.00555152	0.323959	6.81552e-06
ANXA5	-0.111971	0.130006	-0.154772	0.203016	-0.2655	0.000611864	-0.053581	0.757881	-0.266743	0.0003404	-0.377471	1.66445e-06	-0.165551	0.0229922
ANXA6	-0.0323617	0.845552	0.044256	0.927618	-0.569738	0.000278355	0.105462	0.764221	0.0118943	0.944373	-0.6021	0.000101748	0.0731008	0.643416
ANXA7	-0.0681911	0.063679	0.0326678	0.71228	-0.000276642	0.995994	0.00748896	0.942891	-0.0355233	0.3508	-0.0684678	0.0765193	-0.0607022	0.0980699
ANXA8	-0.0597448	0.493965	-0.366116	0.000955442	-0.346316	9.76322e-05	-0.00805826	0.974313	-0.42586	1.24589e-06	-0.406061	4.80888e-06	-0.067803	0.431352
ANXA8L1	-0.0675894	0.474194	-0.406443	0.0006919	-0.457031	3.39612e-06	0.00784935	0.97698	-0.474033	7.05502e-07	-0.52462	1.11458e-07	-0.0597401	0.526917
ANXA9	0.0613675	0.738738	0.0963763	0.840996	0.666359	0.000194624	0.319682	0.328355	0.157744	0.366979	0.727727	4.07536e-05	0.381049	0.0225565
AOC3	0.565107	0.0098358	0.154935	0.787661	-0.0323099	0.911946	0.122965	0.819518	0.720042	0.00114245	0.532797	0.019563	0.688071	0.0016782
AOX1	-0.117133	0.527991	0.215667	0.558244	0.328137	0.0814415	0.376155	0.245453	0.0985339	0.602088	0.211004	0.271544	0.259022	0.143285
AP1AR	-0.00286576	0.988434	0.0906874	0.843776	0.0746294	0.701345	-0.11807	0.757577	0.0878216	0.611836	0.0717636	0.707128	-0.120936	0.470459
AP1B1	0.29412	1.48274e-06	0.0460566	0.752835	-0.039975	0.555318	0.0852095	0.4936	0.340176	6.2869e-08	0.254145	3.45563e-05	0.379329	3.07621e-09
AP1G1	0.15956	0.0985898	-0.00506172	0.987168	-0.0481127	0.675592	-0.0609096	0.791879	0.154498	0.112612	0.111447	0.287656	0.0986501	0.314776
AP1G2	0.0992148	0.0437092	0.0498262	0.655635	0.158208	0.00221959	0.0263516	0.827239	0.149041	0.00259648	0.257422	1.1862e-06	0.125566	0.0101815
AP1M1	0.503072	1.09029e-08	-0.214923	0.0731875	-0.645294	3.91285e-11	0.0652897	0.726031	0.288149	0.000410848	-0.142222	0.0940745	0.568361	3.10939e-10
AP1M2	-0.262122	5.38066e-07	0.040931	0.73647	0.0931808	0.0767491	0.160105	0.0299534	-0.221191	1.5262e-05	-0.168941	0.000984077	-0.102017	0.0376646
AP1S1	-0.114922	0.0742853	-0.0748538	0.579124	-0.0281274	0.718813	0.0714377	0.620293	-0.189776	0.003265	-0.14305	0.0328828	-0.0434846	0.517367
AP1S2	-0.498492	0.00132777	-0.283453	0.295318	-0.140592	0.422896	-0.314265	0.281213	-0.781945	1.55147e-06	-0.639084	8.13917e-05	-0.812757	5.90454e-07
AP1S3	0.018672	0.886705	0.113404	0.670883	-0.18244	0.143962	0.0604967	0.831974	0.132076	0.266429	-0.163768	0.186459	0.0791687	0.51189
AP2A1	-0.133852	0.00379664	0.0242505	0.856939	0.00579092	0.925394	0.0635443	0.524327	-0.109602	0.0179908	-0.128061	0.00751427	-0.0703078	0.129017
AP2B1	0.123342	0.141792	0.0208269	0.942992	-0.0931768	0.313866	0.00792136	0.97457	0.144169	0.0859877	0.030165	0.764919	0.131263	0.114823
AP2M1	-0.069131	0.154628	-0.0358353	0.771853	0.026667	0.641401	0.0560566	0.597515	-0.104966	0.0294036	-0.042464	0.427986	-0.0130744	0.80444
AP2S1	0.0881962	0.328956	-0.000409241	0.998988	-0.0021431	0.986108	0.165518	0.333441	0.0877869	0.334158	0.0860531	0.37497	0.253714	0.00368139
AP3B1	0.251777	0.000128834	-0.00912717	0.970495	-0.0650291	0.370543	-0.00923814	0.960566	0.24265	0.000223554	0.186748	0.00525175	0.242539	0.000200647
AP3B2	0.188501	0.172023	0.022937	0.962676	0.00278078	0.988171	0.0187106	0.962263	0.211438	0.126677	0.191282	0.191591	0.207212	0.129317
AP3D1	0.30621	1.72918e-10	0.0411792	0.672444	-0.0854533	0.0562168	0.0939571	0.214653	0.347389	3.34656e-12	0.220757	1.1808e-06	0.400167	1.58647e-14
AP3M1	0.0906212	0.308524	-0.00487874	0.986136	0.087175	0.370543	-0.0603763	0.769307	0.0857425	0.339557	0.177796	0.0499433	0.0302449	0.747538
AP3M2	-0.142112	0.0739951	-0.24783	0.0293094	-0.521883	9.7074e-09	-0.18038	0.199041	-0.389941	2.74188e-06	-0.663994	2.85246e-12	-0.322492	6.4033e-05
AP3S1	0.0953656	0.175414	0.00838827	0.97496	-0.101678	0.178748	0.063349	0.692913	0.103754	0.141973	-0.00631249	0.944173	0.158715	0.0214394
AP3S2	-0.13337	0.00534209	0.073766	0.417038	0.245738	2.67582e-06	0.0735171	0.464509	-0.0596043	0.224351	0.112367	0.0243427	-0.0598532	0.216498
AP4B1	0.358288	0.000278241	0.22691	0.138653	0.163108	0.11894	0.00608751	0.983867	0.585198	3.17151e-08	0.521396	7.16256e-07	0.364376	0.000207056
AP4E1	0.0890388	0.358228	-0.0208501	0.951196	-0.0858568	0.419741	-0.033985	0.895779	0.0681887	0.490967	0.00318204	0.979327	0.0550538	0.578055
AP4M1	-0.442902	7.96238e-06	-0.0697457	0.778563	-0.193118	0.0570097	-0.0193784	0.943283	-0.512647	4.59634e-07	-0.63602	3.43601e-09	-0.46228	3.25956e-06
AP4S1	-0.330082	0.000700213	-0.189736	0.246626	0.067736	0.546904	-0.0391077	0.87664	-0.519817	4.22431e-07	-0.262346	0.00878664	-0.369189	0.00015657
AP5B1	0.956811	4.00054e-18	-0.142178	0.328979	-0.621852	1.66136e-10	0.124401	0.465619	0.814633	3.042e-15	0.334959	8.74854e-05	1.08121	1.45135e-20
AP5M1	0.0860494	0.433217	0.040093	0.905795	0.0434127	0.736305	-0.0849866	0.727652	0.126142	0.242785	0.129462	0.256899	0.00106286	0.992588
AP5S1	0.127981	0.0149787	-0.0140511	0.937352	-0.116695	0.0360339	0.108775	0.271431	0.11393	0.0312108	0.0112863	0.863935	0.236756	1.25276e-05
AP5Z1	0.462667	1.77819e-07	-0.148826	0.310961	-0.307554	0.000456121	0.00973856	0.967836	0.313841	0.000201406	0.155113	0.0756418	0.472406	9.67367e-08
APAF1	0.337872	0.0027672	0.00077167	0.99873	-0.0599105	0.656487	-0.228516	0.283775	0.338643	0.0028179	0.277961	0.017741	0.109356	0.343757
APBA1	-0.248618	0.174972	0.18364	0.654846	0.502673	0.00817244	-0.220523	0.581067	-0.0649785	0.743261	0.254055	0.191383	-0.469141	0.00906434
APBA2	-0.586289	0.000135746	0.215766	0.466918	0.580436	0.000289779	0.0172757	0.968364	-0.370522	0.0143584	-0.00585262	0.976331	-0.569013	0.000190713
APBA3	-0.0292081	0.761964	-0.131359	0.437391	-0.101562	0.297634	-0.0240995	0.92364	-0.160567	0.0701736	-0.13077	0.164373	-0.0533075	0.565072
APBB1	-1.63254	5.97146e-15	-0.108481	0.808442	0.600522	0.000635648	-0.242139	0.495951	-1.74102	5.44038e-16	-1.03202	2.28362e-08	-1.87468	1.74028e-17
APBB2	0.671172	2.12051e-07	-0.134684	0.609619	-0.637395	1.63862e-06	-0.00259207	0.993128	0.536488	1.86908e-05	0.0337776	0.821335	0.66858	2.05476e-07
APBB3	0.116132	0.461951	0.142736	0.687363	0.141497	0.407965	0.051859	0.902063	0.258868	0.0892638	0.257629	0.106812	0.167991	0.27315
APC	-0.106581	0.478801	0.0632051	0.887049	0.0110705	0.954769	-0.0846541	0.80927	-0.0433758	0.784602	-0.0955104	0.561908	-0.191235	0.186515
APC2	-0.2808	0.240689	0.166325	0.787241	0.261488	0.316555	0.173989	0.754603	-0.114475	0.650843	-0.0193115	0.949611	-0.106811	0.671526
APCDD1	0.0618806	0.814586	0.211396	0.711506	-0.380605	0.136004	0.129698	0.823511	0.273276	0.261234	-0.318725	0.210933	0.191579	0.433975
APCDD1L	-0.18192	0.346406	-0.368551	0.245126	-0.437086	0.0265887	-0.153917	0.722037	-0.550472	0.00341037	-0.619007	0.0014316	-0.335837	0.0719058
APEH	-0.243548	3.48176e-06	0.0763552	0.426921	0.287329	2.83589e-07	0.106142	0.253734	-0.167193	0.000992273	0.0437815	0.435424	-0.137406	0.00598096
APEX1	-0.444626	4.70664e-08	0.112673	0.436403	0.422901	4.17932e-07	-0.0107293	0.960566	-0.331953	2.00245e-05	-0.0217248	0.814649	-0.455355	2.25109e-08
APEX2	-0.0907442	0.15152	0.0582922	0.693831	0.182192	0.00557356	0.0338283	0.825619	-0.032452	0.629811	0.0914475	0.172613	-0.0569159	0.376439
APH1A	0.433538	2.71057e-11	-0.0814509	0.457944	-0.201206	0.000709378	0.0465464	0.720893	0.352087	1.16859e-08	0.232332	8.33659e-05	0.480085	7.31649e-13
APH1B	-0.928047	3.03864e-18	0.212097	0.0694043	0.314827	0.000162368	0.0036908	0.987131	-0.71595	9.28064e-14	-0.61322	2.75596e-11	-0.924356	2.6599e-18
API5	-0.0787271	0.30376	0.0307526	0.896096	0.130909	0.101174	-0.0516044	0.771166	-0.0479745	0.545341	0.0521819	0.539907	-0.130331	0.0797326
APIP	-0.665313	3.30557e-12	0.161711	0.236898	0.673398	1.29553e-11	0.0291897	0.896607	-0.503603	1.3415e-08	0.00808474	0.938011	-0.636124	1.13299e-11
APLF	-0.374514	0.0014379	0.000260182	0.999438	0.25579	0.0384495	-0.0336999	0.919342	-0.374254	0.00150978	-0.118725	0.356911	-0.408214	0.000512286
APLN	-0.0714694	0.807434	-0.0205643	0.982822	0.422335	0.138094	0.044862	0.952378	-0.0920336	0.750321	0.350866	0.217187	-0.0266073	0.928048
APLP1	-0.114236	0.583018	0.145936	0.772729	-0.0235241	0.929123	0.00801277	0.987793	0.0316996	0.888357	-0.137761	0.538937	-0.106224	0.610439
APLP2	0.260654	2.14444e-07	-0.0613602	0.520983	-0.0864641	0.0856693	0.026597	0.818064	0.199294	3.90437e-05	0.17419	0.000388463	0.287251	1.80682e-08
APMAP	-0.535865	3.83929e-10	0.166079	0.177146	0.431854	3.07615e-07	0.18547	0.148662	-0.369786	3.21749e-06	-0.104011	0.202521	-0.350395	7.65193e-06
APOBEC3A	5.80548	2.34462e-24	-0.545729	0.428671	-2.54948	1.44668e-09	0.18823	0.832571	5.25975	3.21462e-22	3.256	2.01789e-13	5.99371	4.07134e-25
APOBEC3B	1.02617	7.52637e-10	-0.297155	0.236786	-0.765039	2.51887e-06	0.062493	0.871103	0.729014	2.87907e-06	0.26113	0.0964652	1.08866	1.07259e-10
APOBEC3C	0.795982	3.2682e-09	-0.239542	0.245118	-0.530098	4.76937e-05	0.0409921	0.904099	0.55644	1.04725e-05	0.265885	0.0363339	0.836975	6.77714e-10
APOBEC3D	1.7358	2.82557e-19	-0.208693	0.432757	-1.27048	7.45297e-13	0.026408	0.947661	1.52711	7.59394e-17	0.465325	0.00124985	1.76221	1.11206e-19
APOBEC3F	1.6858	1.25131e-15	-0.143399	0.720475	-1.22914	3.49552e-10	0.201454	0.580714	1.5424	4.01769e-14	0.456657	0.00760968	1.88725	9.41037e-18
APOBEC3G	2.71372	1.03481e-23	-0.216356	0.547106	-1.59491	7.04654e-13	0.188018	0.631373	2.49736	6.95932e-22	1.11881	8.83056e-09	2.90174	3.44243e-25
APOBEC3H	0.319411	0.138324	0.0409064	0.959509	-0.352817	0.125009	-0.132213	0.797597	0.360318	0.0951234	-0.0334058	0.901576	0.187198	0.394279
APOBEC4	-0.714628	4.86997e-05	-0.317877	0.288383	-1.1154	1.3612e-08	-0.45535	0.105332	-1.0325	3.22051e-08	-1.83003	4.19637e-16	-1.16998	9.17899e-10
APOBR	0.992574	0.000441449	-0.0142631	0.98772	-0.4424	0.143124	0.170299	0.801818	0.978311	0.000547097	0.550174	0.0607831	1.16287	4.45187e-05
APOC1	0.0289616	0.930322	0.291369	0.660798	0.143672	0.68008	0.47359	0.430061	0.320331	0.286175	0.172634	0.608759	0.502551	0.08413
APOD	1.35198	5.07547e-12	0.187801	0.599922	-0.627777	0.0003736	0.230032	0.522672	1.53978	5.97381e-14	0.7242	3.75641e-05	1.58201	1.53342e-14
APOE	0.00480754	0.985499	-0.0460119	0.953471	0.0671256	0.805803	-0.232739	0.636925	-0.0412044	0.868392	0.0719331	0.788608	-0.227931	0.306746
APOL1	2.49654	2.80697e-32	-0.196876	0.305461	-0.998632	7.04654e-13	0.0807858	0.754804	2.29966	2.5118e-30	1.49791	1.13109e-20	2.57733	4.31078e-33
APOL2	2.56979	5.53501e-28	-0.30821	0.152265	-1.22679	9.70712e-13	0.0993761	0.757577	2.26158	4.45398e-25	1.34299	6.52155e-15	2.66916	6.39344e-29
APOL3	2.55131	6.68041e-21	-0.143371	0.766057	-1.66439	1.90193e-12	0.202006	0.632708	2.40794	1.073e-19	0.886912	8.67833e-06	2.75331	1.53368e-22
APOL4	3.65959	5.50066e-22	-0.220205	0.722839	-2.08666	2.25114e-11	0.23567	0.689651	3.43938	1.18127e-20	1.57293	2.65927e-08	3.89526	2.43767e-23
APOL6	2.48517	6.22609e-28	-0.249021	0.270236	-1.16084	2.04904e-12	0.137239	0.643431	2.23615	1.61745e-25	1.32433	3.37887e-15	2.62241	3.24129e-29
APOLD1	-0.180825	0.0590719	0.250764	0.0802046	0.320623	0.00146023	-0.0957586	0.65918	0.0699388	0.488427	0.139798	0.172259	-0.276583	0.00367302
APOM	-0.13674	0.385348	-0.0214824	0.970495	0.0955523	0.592985	0.172229	0.612159	-0.158222	0.313508	-0.0411877	0.825973	0.0354894	0.832091
APOO	-0.519339	1.17519e-06	0.0731953	0.782876	-0.0427784	0.730546	0.0913658	0.697476	-0.446144	2.1076e-05	-0.562118	3.52559e-07	-0.427974	3.62649e-05
APOOL	-0.467442	0.000406216	0.0234538	0.962166	0.238642	0.0875469	-0.0182881	0.961598	-0.443988	0.000778916	-0.2288	0.0976318	-0.48573	0.000230235
APOPT1	-0.195373	0.021392	-0.0131197	0.967418	-0.0895092	0.347932	0.0578492	0.776648	-0.208493	0.0144714	-0.284882	0.00125441	-0.137524	0.106126
APP	0.0119966	0.897872	-0.216278	0.080113	-0.235404	0.00654316	-0.111718	0.532005	-0.204281	0.0134155	-0.223407	0.00896182	-0.0997211	0.232216
APPBP2	0.200867	0.0172745	0.0192737	0.949333	-0.0681314	0.482388	-0.0586829	0.770791	0.220141	0.00937424	0.132736	0.14089	0.142184	0.0922438
APPL1	0.188156	0.0885196	-0.0236161	0.952911	0.000609159	0.997141	-0.0180272	0.954195	0.16454	0.140961	0.188765	0.104843	0.170128	0.1224
APRT	-0.530673	2.74258e-05	0.16195	0.514688	0.463739	0.00037357	0.222713	0.361434	-0.368724	0.00287699	-0.0669346	0.641009	-0.307961	0.0117395
APTR	0.0132502	0.895172	-0.0378664	0.890609	-0.0349931	0.748931	0.0711174	0.729728	-0.0246162	0.803498	-0.0217429	0.843482	0.0843676	0.354874
APTX	-0.177675	0.00727827	0.0190194	0.93023	0.0764363	0.298209	0.0164227	0.93115	-0.158656	0.0169173	-0.101239	0.152611	-0.161253	0.014248
AQP1	-0.454098	0.0159883	-0.115109	0.826153	-0.354577	0.0784096	-0.1564	0.720797	-0.569207	0.00272388	-0.808676	4.77305e-05	-0.610498	0.00122551
AQP10	-0.951679	2.16906e-06	-0.0272306	0.970441	-1.0129	1.49956e-06	-0.590524	0.0429872	-0.97891	1.30533e-06	-1.96458	1.91033e-15	-1.5422	5.42615e-12
AQP11	-0.0783077	0.653882	0.0774115	0.87609	0.0469948	0.818153	0.16752	0.649873	-0.000896218	0.996014	-0.0313129	0.87854	0.0892121	0.60556
AQP3	0.0233714	0.88409	-0.0507058	0.912123	-0.132504	0.408994	0.275134	0.314432	-0.0273344	0.865396	-0.109132	0.495146	0.298505	0.0338115
AQP4	-0.755397	2.69868e-05	0.0357619	0.955282	0.605785	0.00102805	-0.288095	0.423368	-0.719635	6.08809e-05	-0.149612	0.444116	-1.04349	3.19456e-08
AQP4-AS1	-0.539948	0.0122115	-0.436979	0.229165	0.113729	0.659348	-0.371465	0.394076	-0.976927	1.27943e-05	-0.426219	0.0600791	-0.911413	3.54909e-05
AQP5	0.651681	2.90706e-05	0.0138543	0.980297	0.622877	0.000117658	0.337382	0.215632	0.665536	2.15689e-05	1.27456	2.50545e-12	0.989064	3.08828e-09
AQP6	0.501684	0.0368603	0.00095773	0.999177	0.172035	0.538057	-0.165733	0.772724	0.502642	0.0373952	0.67372	0.00688864	0.335951	0.165045
AQP7	-1.77252	3.22919e-12	-0.201207	0.692483	-0.794122	0.000493503	-0.27378	0.564045	-1.97372	8.15708e-14	-2.56664	4.93228e-18	-2.04629	1.52245e-14
AQR	-0.162825	0.0141985	0.0987919	0.442226	0.168952	0.0156979	0.000876541	0.995992	-0.0640333	0.353475	0.00612658	0.943442	-0.161949	0.0142025
AR	-1.60093	4.10676e-10	0.269673	0.570325	1.76939	9.65508e-11	-0.130211	0.815841	-1.33125	5.99711e-08	0.168462	0.513413	-1.73114	3.08568e-11
ARAF	0.44965	3.62294e-15	-0.0678444	0.434972	-0.123401	0.00940585	-0.0304339	0.77916	0.381806	1.45972e-12	0.32625	3.39257e-10	0.419217	3.82572e-14
ARAP1	-0.00133892	0.982519	-0.00571711	0.974961	0.00824455	0.90179	-0.124979	0.144937	-0.00705603	0.904063	0.00690563	0.913733	-0.126318	0.0120557
ARAP1-AS1	-0.109765	0.660552	-0.0893777	0.904511	0.294935	0.249591	0.0502356	0.940085	-0.199143	0.412591	0.18517	0.48005	-0.0595298	0.816268
ARAP1-AS2	0.141448	0.60116	-0.43024	0.353924	-0.159002	0.596464	-0.380115	0.482484	-0.288792	0.271446	-0.0175537	0.957888	-0.238667	0.361492
ARAP2	1.20332	1.72202e-14	-0.124824	0.665957	-0.555182	4.11614e-05	-0.00424404	0.990388	1.07849	9.40895e-13	0.648135	1.73104e-06	1.19907	1.49042e-14
ARAP3	-0.0736928	0.351369	-0.166542	0.181394	0.084168	0.3239	-0.167495	0.226511	-0.240235	0.00183727	0.0104751	0.913505	-0.241188	0.00160414
ARC	0.0695309	0.790169	0.381513	0.385163	-0.150127	0.589216	0.305627	0.554611	0.451044	0.0579807	-0.0805959	0.780323	0.375158	0.112879
ARCN1	0.149853	0.00180719	0.0494807	0.64703	0.0298619	0.596451	-0.0415627	0.709543	0.199334	5.00964e-05	0.179715	0.000320544	0.10829	0.0226862
AREG	1.13972	4.80113e-05	0.235417	0.723573	-0.627023	0.0297554	0.683889	0.137562	1.37514	1.78443e-06	0.512698	0.075209	1.82361	1.69899e-09
AREL1	-0.023759	0.754115	-0.0060478	0.980911	0.00446039	0.96221	-0.0551994	0.731098	-0.0298068	0.69242	-0.0192986	0.821485	-0.0789584	0.261849
ARF1	0.192756	2.10923e-06	0.0382451	0.668986	-0.00943812	0.848276	0.0897919	0.186572	0.231001	4.0756e-08	0.183318	8.72027e-06	0.282548	1.26252e-10
ARF3	0.106182	0.0146376	-0.0154283	0.912552	0.000384549	0.995277	0.00368132	0.978059	0.0907537	0.0381006	0.106567	0.0187432	0.109863	0.0111466
ARF4	0.222928	0.00144138	0.0211898	0.926832	-0.062786	0.427866	-0.040989	0.809626	0.244117	0.000540614	0.160142	0.0274993	0.181939	0.00855015
ARF4-AS1	-0.486704	0.0658977	-0.160435	0.826771	0.151274	0.62966	-0.102342	0.88419	-0.647139	0.0144846	-0.33543	0.240381	-0.589046	0.0246654
ARF5	-0.270154	0.000442775	0.0206936	0.935828	0.206169	0.00987666	0.0312609	0.874626	-0.24946	0.0011577	-0.0639846	0.452216	-0.238893	0.00166127
ARF6	0.490099	1.74023e-10	-0.0562577	0.735409	-0.197383	0.00535759	0.0940725	0.516667	0.433841	5.86723e-09	0.292716	3.92259e-05	0.584172	4.52272e-13
ARFGAP1	0.175783	0.00196334	-0.0964148	0.346873	-0.164516	0.00563092	-0.149911	0.10568	0.0793685	0.168991	0.0112673	0.87412	0.0258719	0.670386
ARFGAP2	0.370091	2.30321e-10	0.000876808	0.99584	-0.14713	0.00648376	0.0626137	0.58221	0.370968	2.27667e-10	0.222961	3.974e-05	0.432705	1.2229e-12
ARFGAP3	0.134348	0.00104195	0.0360709	0.713986	0.0980601	0.0220897	-0.0432624	0.638441	0.170419	4.65044e-05	0.232408	1.75966e-07	0.0910857	0.0242631
ARFGEF1	0.0226686	0.848091	-0.0150105	0.970213	0.157894	0.166702	-0.0829243	0.733852	0.00765808	0.949594	0.180562	0.104862	-0.0602557	0.588007
ARFGEF2	0.0149927	0.924704	0.0603232	0.889103	0.128795	0.414556	-0.166175	0.590707	0.0753159	0.614457	0.143788	0.348148	-0.151183	0.286257
ARFGEF3	-0.332032	0.00323494	0.161229	0.4659	0.423449	0.000386362	-0.0548618	0.844722	-0.170803	0.135786	0.0914172	0.470293	-0.386894	0.000620099
ARFIP1	0.240471	0.0145036	0.0474134	0.875269	-0.0801994	0.477931	-0.0858309	0.708608	0.287885	0.00363341	0.160272	0.12613	0.15464	0.117033
ARFIP2	-0.24296	0.000119979	0.012625	0.955601	0.0439235	0.542446	0.0250828	0.876764	-0.230335	0.000260343	-0.199036	0.00197507	-0.217877	0.000473006
ARFRP1	0.36923	4.53368e-06	-0.219725	0.0531409	-0.356877	1.84391e-05	0.0282126	0.894566	0.149505	0.0545584	0.0123533	0.898992	0.397443	9.55327e-07
ARG2	-0.322984	0.0426384	0.0268797	0.962676	0.0808661	0.671274	-0.0359285	0.937414	-0.296104	0.0651198	-0.242118	0.154907	-0.358913	0.0232935
ARGLU1	0.126548	0.0490484	0.0347386	0.850947	0.18459	0.00622611	0.0279883	0.864148	0.161287	0.0122488	0.311138	5.5498e-06	0.154537	0.0154245
ARHGAP1	0.353344	1.3756e-08	-0.00376878	0.984808	-0.0489394	0.451647	0.0160583	0.920663	0.349575	1.92211e-08	0.304405	7.63936e-07	0.369402	3.59839e-09
ARHGAP10	-0.171668	0.0261032	-0.0134969	0.962341	0.14378	0.0815064	-0.0808263	0.643431	-0.185165	0.0168637	-0.0278877	0.766276	-0.252494	0.00109566
ARHGAP11A	-0.0445685	0.742175	0.0492513	0.900997	0.235099	0.0747386	0.184762	0.481735	0.00468288	0.973856	0.190531	0.149432	0.140194	0.264578
ARHGAP12	0.329679	0.0107853	0.00187576	0.996311	-0.0253637	0.880084	-0.156999	0.583766	0.331555	0.0106466	0.304315	0.0241253	0.17268	0.186081
ARHGAP15	0.985278	5.05418e-06	0.309789	0.437403	-0.436267	0.0469908	0.368766	0.374839	1.29507	1.24046e-08	0.54901	0.0107111	1.35404	3.01926e-09
ARHGAP17	0.849047	5.57707e-16	-0.169042	0.211868	-0.586015	9.02656e-10	0.022213	0.923931	0.680005	2.12158e-12	0.263032	0.0018498	0.87126	1.47758e-16
ARHGAP18	-0.783486	1.0899e-07	-0.133417	0.676008	-0.435468	0.00257805	-0.0917205	0.781924	-0.916903	2.09887e-09	-1.21895	3.86276e-13	-0.875206	5.87092e-09
ARHGAP19	0.150113	0.0520937	0.0170289	0.951655	0.0694424	0.428826	-0.102228	0.543293	0.167142	0.030935	0.219556	0.00605795	0.0478851	0.55572
ARHGAP20	0.919136	2.36117e-05	-0.257087	0.56007	-0.593343	0.00744904	-0.17961	0.714796	0.662049	0.00186066	0.325793	0.148565	0.739526	0.000491501
ARHGAP21	0.42514	0.000789613	-0.131819	0.639179	-0.469267	0.000421023	-0.0687353	0.824222	0.293321	0.0199035	-0.0441273	0.773216	0.356405	0.00437992
ARHGAP22	-0.315362	0.0250616	0.0357848	0.942328	0.390628	0.0083246	0.0941376	0.781701	-0.279577	0.0485745	0.0752661	0.64814	-0.221224	0.117036
ARHGAP23	0.27168	2.4395e-05	-0.144184	0.145114	-0.214782	0.00112293	0.068753	0.625036	0.127496	0.0425403	0.0568972	0.413974	0.340433	2.77957e-07
ARHGAP23P1	0.263186	0.120855	-0.0978738	0.838288	-0.218251	0.238259	-0.118224	0.767199	0.165312	0.343638	0.0449351	0.828426	0.144963	0.403147
ARHGAP24	0.0943147	0.192389	0.0870764	0.559127	0.0576687	0.480716	-0.120129	0.407941	0.181391	0.0111169	0.151983	0.0415331	-0.0258141	0.738363
ARHGAP25	0.31145	0.126801	0.219077	0.62197	-0.278839	0.207637	0.509602	0.133929	0.530527	0.00890218	0.0326106	0.898119	0.821052	6.58968e-05
ARHGAP26	0.576115	1.05226e-05	-0.21877	0.334768	-0.30373	0.0222669	-0.201456	0.442293	0.357345	0.00480413	0.272385	0.0391684	0.374658	0.00290175
ARHGAP27	0.971847	2.71685e-18	-0.160534	0.248841	-0.500047	6.20117e-08	0.223792	0.0906933	0.811313	4.58002e-15	0.4718	1.42558e-07	1.19564	1.95916e-22
ARHGAP27P1-BPTFP1-KPNA2P3	-0.000587821	0.997366	0.296612	0.209839	0.273215	0.0713937	0.374696	0.107948	0.296025	0.0382978	0.272627	0.0684646	0.374108	0.00814296
ARHGAP27P2	-0.512517	0.0214975	-0.15536	0.792017	0.00674503	0.983186	-0.133553	0.807159	-0.667877	0.00293294	-0.505772	0.0300257	-0.64607	0.00366019
ARHGAP28	-0.239032	0.282408	-0.114802	0.855769	0.0194223	0.948477	-0.140386	0.786844	-0.353834	0.10752	-0.219609	0.358377	-0.379417	0.0798997
ARHGAP29	-0.210084	0.128996	0.109443	0.750899	0.46759	0.00122547	-0.0703038	0.835392	-0.100641	0.487028	0.257506	0.0747326	-0.280388	0.0399274
ARHGAP30	0.398148	0.00468676	0.0916362	0.809357	-0.174055	0.26246	0.297151	0.254336	0.489784	0.000592665	0.224093	0.135385	0.695299	2.17905e-06
ARHGAP31	0.362718	0.063361	-0.536969	0.0631357	-1.17749	7.97e-08	-0.241102	0.574963	-0.174252	0.390823	-0.814772	6.96002e-05	0.121615	0.553193
ARHGAP32	0.379463	5.66084e-06	-0.0924233	0.586799	-0.109095	0.215426	-0.0553663	0.772766	0.287039	0.000430176	0.270368	0.00119446	0.324096	7.26903e-05
ARHGAP33	-0.297647	0.124904	0.145783	0.768095	0.438985	0.0305323	0.119482	0.797434	-0.151864	0.452115	0.141338	0.517846	-0.178165	0.366984
ARHGAP35	-0.236195	0.004971	-0.0307848	0.909918	0.266825	0.00254652	-0.129909	0.462011	-0.26698	0.00163786	0.0306297	0.763921	-0.366105	2.14638e-05
ARHGAP39	-0.782245	1.56566e-10	-0.0935048	0.719617	-0.368602	0.00113015	-0.2397	0.213846	-0.87575	4.67152e-12	-1.15085	3.35651e-16	-1.02195	1.42631e-14
ARHGAP4	-0.0802382	0.56344	0.0639935	0.872253	-0.0455219	0.778556	-0.136552	0.645836	-0.0162447	0.914845	-0.12576	0.387251	-0.21679	0.0987437
ARHGAP40	0.357816	0.0956504	0.295273	0.485137	0.135098	0.59094	0.21211	0.661978	0.653088	0.00239109	0.492914	0.026968	0.569926	0.00728222
ARHGAP42	-0.00561107	0.976475	-0.134705	0.728131	-0.0977608	0.600028	-0.157113	0.661978	-0.140316	0.394761	-0.103372	0.569254	-0.162724	0.313804
ARHGAP44	-0.184468	0.0442795	-0.11851	0.527734	-0.463463	3.5777e-06	0.0310201	0.90346	-0.302978	0.00106646	-0.647931	6.2351e-10	-0.153448	0.0940455
ARHGAP45	0.40392	0.000163821	0.0216949	0.955168	-0.353105	0.00147473	0.0240646	0.936156	0.425614	8.06953e-05	0.0508147	0.683202	0.427984	6.5695e-05
ARHGAP5	0.238779	0.195525	-0.183202	0.657652	-0.38855	0.0431884	-0.21573	0.592719	0.0555775	0.781999	-0.14977	0.462458	0.0230487	0.908828
ARHGAP5-AS1	-0.420913	0.000268215	-0.00674163	0.985834	0.188413	0.124729	0.059782	0.831961	-0.427654	0.000226122	-0.232499	0.0514967	-0.361131	0.00151392
ARHGAP6	-0.620028	0.00533166	0.0503622	0.949769	0.0626086	0.822918	-0.250873	0.616134	-0.569665	0.0106652	-0.557419	0.0159673	-0.870901	0.000113465
ARHGAP8	-0.221925	0.0943142	-0.113665	0.723258	0.390201	0.00486416	-0.0144475	0.970179	-0.33559	0.0111686	0.168276	0.238696	-0.236372	0.0725572
ARHGDIA	0.227422	0.000378962	0.0149618	0.946397	-0.10834	0.110846	0.0822904	0.551152	0.242384	0.000169856	0.119082	0.0737	0.309712	2.5561e-06
ARHGDIB	-1.02541	4.15041e-08	0.35673	0.215588	1.13337	1.05479e-08	0.189496	0.625648	-0.668682	0.000148137	0.107962	0.587575	-0.835916	3.22222e-06
ARHGEF1	0.296556	9.63734e-05	-0.1407	0.274441	-0.242755	0.00197543	0.0297702	0.879324	0.155857	0.0373909	0.053801	0.525892	0.326326	1.96684e-05
ARHGEF10	-0.0308397	0.794885	-0.124025	0.582872	-0.0630264	0.619445	-0.146647	0.5267	-0.154865	0.156087	-0.0938661	0.433007	-0.177487	0.0978528
ARHGEF10L	0.205371	0.000115618	-0.0572206	0.61676	0.0985521	0.0772613	-0.0747042	0.50345	0.14815	0.0047553	0.303923	1.14457e-07	0.130667	0.0118753
ARHGEF11	0.449888	3.71836e-12	0.0393005	0.784473	-0.0379825	0.552931	-0.0471508	0.713285	0.489188	2.22917e-13	0.411905	1.02532e-10	0.402737	1.02416e-10
ARHGEF12	0.136631	0.267677	-0.0505225	0.893527	-0.000786545	0.996686	-0.07809	0.786514	0.0861084	0.499214	0.135844	0.302372	0.0585409	0.649812
ARHGEF16	0.572035	1.30303e-10	-0.0804028	0.649451	-0.0923827	0.284668	-0.00762567	0.973847	0.491632	9.92015e-09	0.479652	2.89126e-08	0.564409	1.58361e-10
ARHGEF17	-0.0500842	0.496621	-0.146568	0.209184	-0.0158484	0.860098	-0.202068	0.0670302	-0.196652	0.00523851	-0.0659327	0.397814	-0.252152	0.00035873
ARHGEF18	0.281571	0.00171573	-0.278268	0.030036	-0.517332	2.19419e-07	-0.191761	0.241879	0.00330324	0.974554	-0.23576	0.0110704	0.0898104	0.326322
ARHGEF19	0.0991802	0.378628	0.0710327	0.807977	0.242729	0.0344759	0.143483	0.545928	0.170213	0.122996	0.34191	0.00242247	0.242663	0.0246033
ARHGEF2	0.697427	1.21198e-12	-0.192719	0.136907	-0.516438	3.27298e-08	-0.0347186	0.870692	0.504709	1.97406e-08	0.18099	0.0353712	0.662709	5.26766e-12
ARHGEF26	-0.735024	2.55507e-08	0.069479	0.84113	0.367464	0.00395947	0.00161669	0.995992	-0.665545	2.85945e-07	-0.367561	0.00349622	-0.733408	2.33047e-08
ARHGEF26-AS1	-1.52643	5.59942e-12	-0.210103	0.607957	-0.27378	0.182411	-0.131063	0.77059	-1.73653	6.88687e-14	-1.80021	2.72177e-14	-1.65749	2.62964e-13
ARHGEF28	-0.00486101	0.958071	-0.129548	0.381252	-0.216633	0.00969295	-0.160941	0.285525	-0.134409	0.0955114	-0.221494	0.00736208	-0.165802	0.0364584
ARHGEF3	0.40362	3.08886e-06	-0.0971311	0.576142	-0.347756	8.53792e-05	-0.102143	0.576874	0.306488	0.000272262	0.0558638	0.555918	0.301476	0.000301139
ARHGEF33	-0.523746	0.00568349	-0.108698	0.840939	-0.252606	0.22446	-0.0694707	0.894038	-0.632444	0.000955027	-0.776352	9.43163e-05	-0.593217	0.00171873
ARHGEF34P	0.491906	8.08836e-05	-0.348584	0.0523832	-0.416215	0.00123414	-0.105149	0.712734	0.143322	0.253986	0.075691	0.590736	0.386757	0.00153963
ARHGEF35	0.388263	3.3924e-07	-0.107256	0.435928	-0.239024	0.00152651	-0.0268947	0.889786	0.281007	0.000121757	0.149239	0.0464755	0.361368	1.40341e-06
ARHGEF37	0.629318	3.93978e-09	-0.152668	0.400518	-0.591535	6.05018e-08	0.0550327	0.817068	0.47665	2.66014e-06	0.0377837	0.745118	0.684351	3.09908e-10
ARHGEF38	0.842525	9.44822e-09	-0.134487	0.659407	-0.243132	0.089539	-0.23557	0.380153	0.708038	6.23874e-07	0.599393	2.30594e-05	0.606956	1.07379e-05
ARHGEF39	-0.291998	0.0691458	0.241628	0.430323	0.492497	0.00343636	0.104676	0.78521	-0.05037	0.775954	0.200498	0.248247	-0.187322	0.249201
ARHGEF4	-0.258513	0.0579853	0.212483	0.408358	-0.0277597	0.874955	0.324581	0.164056	-0.0460308	0.7582	-0.286273	0.0445579	0.0660671	0.650185
ARHGEF40	0.273906	0.0169211	-0.504926	0.000958951	-0.745151	1.40319e-08	-0.252789	0.223388	-0.23102	0.0454513	-0.471245	9.24063e-05	0.0211166	0.868471
ARHGEF5	0.501872	8.26926e-09	-0.253091	0.0252566	-0.328875	0.000103425	-0.0657836	0.720797	0.248781	0.0018641	0.172997	0.0370589	0.436089	2.25397e-07
ARHGEF6	0.370971	0.00263223	-0.12405	0.658009	-0.3734	0.0038713	-0.0645465	0.831974	0.246921	0.046037	-0.00242923	0.98833	0.306425	0.0122021
ARHGEF7	0.0215985	0.651879	-0.0363808	0.743934	0.00982583	0.863603	-0.0507263	0.612152	-0.0147823	0.76352	0.0314243	0.537723	-0.0291278	0.533631
ARHGEF9	-0.0466334	0.468611	0.113097	0.293004	0.251205	0.000126007	0.0993747	0.433471	0.0664632	0.294619	0.204572	0.00134151	0.0527413	0.404686
ARID1A	0.198565	5.46895e-05	-0.10199	0.199434	-0.0653772	0.214473	-0.0192527	0.878649	0.0965747	0.0456661	0.133187	0.00752047	0.179312	0.000219456
ARID1B	-0.0953862	0.238716	-0.0912952	0.586338	-0.00335779	0.976021	-0.123957	0.454827	-0.186681	0.0188751	-0.098744	0.250943	-0.219343	0.00542522
ARID2	0.00925083	0.93468	-0.0610515	0.824077	0.00807085	0.952162	-0.137718	0.516667	-0.0518006	0.626002	0.0173217	0.890105	-0.128467	0.197972
ARID3A	0.191917	0.0296105	-0.153159	0.334768	-0.14415	0.13035	-0.151612	0.395513	0.0387577	0.686236	0.0477668	0.643447	0.0403051	0.671112
ARID3B	0.460772	4.08223e-05	-0.19951	0.300002	-0.224707	0.0529433	-0.0870071	0.731248	0.261262	0.0172803	0.236065	0.0392539	0.373765	0.00066538
ARID3C	-0.531982	0.00716059	0.202209	0.652822	0.195545	0.380964	0.16882	0.714796	-0.329773	0.0996584	-0.336437	0.108904	-0.363163	0.0657682
ARID4A	0.498013	2.18485e-10	-0.145061	0.205767	-0.17751	0.0145653	-0.049069	0.764988	0.352952	1.30133e-06	0.320503	1.24198e-05	0.448944	3.47522e-09
ARID4B	0.413406	1.89768e-11	-0.174552	0.019794	-0.212596	0.000165994	-0.0595392	0.617244	0.238854	1.3977e-05	0.20081	0.000287534	0.353867	1.65228e-09
ARID5A	1.04783	1.2973e-10	-0.514548	0.00891082	-1.04669	5.68483e-10	-0.215437	0.475534	0.533286	0.000245572	0.00114022	0.994859	0.832397	5.78299e-08
ARID5B	0.542084	1.24262e-06	-0.00737231	0.984475	-0.189187	0.0962765	-0.0191504	0.949643	0.534711	1.73462e-06	0.352896	0.00137264	0.522933	2.32009e-06
ARIH1	-0.0245609	0.762179	-0.0112373	0.968529	-0.0254605	0.780542	-0.0661671	0.70062	-0.0357982	0.654128	-0.0500214	0.555597	-0.0907281	0.225992
ARIH2	-0.015258	0.726354	0.0663328	0.366397	0.150632	0.000374329	-0.00257324	0.983152	0.0510747	0.211442	0.135374	0.001108	-0.0178313	0.678052
ARIH2OS	0.20028	0.204119	0.00398434	0.992764	-0.191589	0.263173	0.02849	0.948932	0.204264	0.197719	0.00869081	0.965748	0.22877	0.141891
ARL1	0.022794	0.691063	0.093051	0.324641	0.137583	0.013385	-0.00813602	0.958004	0.115845	0.0291749	0.160378	0.00346876	0.014658	0.801592
ARL10	-1.43564	2.48377e-16	0.0827765	0.825395	0.775078	2.51003e-07	-0.0500589	0.8916	-1.35286	2.83228e-15	-0.660558	4.46034e-06	-1.48569	4.43813e-17
ARL11	-0.10526	0.619202	0.18068	0.703407	0.127968	0.582813	0.0574178	0.919298	0.0754203	0.728474	0.0227087	0.928894	-0.0478417	0.826808
ARL13B	-0.678695	2.59258e-10	-0.130129	0.48924	-0.108522	0.301889	-0.179752	0.329312	-0.808823	1.00144e-12	-0.787216	3.71811e-12	-0.858447	8.83643e-14
ARL14	2.29018	4.63183e-20	-0.0138789	0.982813	-1.16	9.10519e-09	0.203652	0.600993	2.2763	7.4038e-20	1.13018	8.89562e-09	2.49384	7.50931e-22
ARL14EP	-0.0894313	0.24999	0.0285659	0.90729	0.0824411	0.331844	-0.0253396	0.905364	-0.0608654	0.446116	-0.00699013	0.943605	-0.114771	0.13247
ARL14EPL	0.475102	0.00891354	0.0225458	0.97496	-0.486503	0.0109255	0.00557854	0.990786	0.497648	0.00639256	-0.0114005	0.961254	0.480681	0.00784975
ARL15	-0.165317	0.166548	-0.249742	0.201396	-0.165334	0.19986	-0.383477	0.0297724	-0.415059	0.000522934	-0.330651	0.00690835	-0.548795	6.87381e-06
ARL16	-0.220757	0.00932461	-0.0212209	0.943497	0.0901514	0.343833	0.0538686	0.791879	-0.241978	0.00458761	-0.130606	0.150574	-0.166889	0.0485433
ARL17A	-0.495168	0.00727218	0.0219536	0.97496	0.298479	0.134179	-0.0280592	0.958218	-0.473214	0.0105487	-0.196689	0.331879	-0.523227	0.00440437
ARL17B	-0.158936	0.351861	0.133856	0.746076	0.135783	0.473343	0.182062	0.624507	-0.02508	0.895238	-0.0231533	0.911425	0.0231253	0.89971
ARL2	-0.35067	0.00269629	-0.0117072	0.979157	0.200011	0.110604	0.0817145	0.76791	-0.362377	0.00204329	-0.150659	0.23211	-0.268956	0.0202505
ARL2BP	-0.0930488	0.0470173	0.0586894	0.542842	-0.0447377	0.398419	0.0536648	0.606409	-0.0343594	0.486796	-0.137786	0.00450902	-0.039384	0.415003
ARL3	-1.29888	1.4249e-16	-0.0219502	0.961234	0.217156	0.0917254	-0.107555	0.700563	-1.32083	8.27998e-17	-1.08172	2.40282e-13	-1.40644	3.79789e-18
ARL4A	-0.223474	0.000558014	0.0413351	0.812838	0.213098	0.00160024	0.12544	0.309811	-0.182139	0.00464905	-0.0103758	0.898007	-0.0980342	0.127085
ARL4AP2	-0.0288461	0.910253	-0.287335	0.532084	0.00411264	0.98939	-0.102639	0.85638	-0.316181	0.167556	-0.0247334	0.931874	-0.131485	0.57966
ARL4C	-0.0673827	0.589068	-0.538927	0.000535211	-0.518884	3.94603e-05	-0.0946844	0.728667	-0.60631	1.06497e-06	-0.586266	3.1641e-06	-0.162067	0.17114
ARL4D	0.276188	0.0147183	0.336058	0.0417468	0.281593	0.0181925	0.42923	0.00765441	0.612247	3.99117e-07	0.557781	4.12447e-06	0.705418	1.09711e-08
ARL5A	-0.312289	0.0161478	0.024552	0.959972	0.14153	0.32961	-0.170896	0.548273	-0.287737	0.0274059	-0.170759	0.223612	-0.483185	0.00023127
ARL5B	1.28635	4.77761e-09	-0.128014	0.813405	-0.716219	0.000669325	0.0163663	0.978666	1.15833	7.32565e-08	0.570128	0.00576172	1.30271	2.90447e-09
ARL6	-0.616768	1.44109e-05	-0.0577685	0.893483	-0.0959303	0.549736	-0.180366	0.549154	-0.674537	2.92408e-06	-0.712699	1.47725e-06	-0.797134	6.58447e-08
ARL6IP1	0.215101	0.0011138	-0.0184632	0.932356	-0.0555937	0.458247	-0.0353736	0.826379	0.196637	0.00287055	0.159507	0.0194583	0.179727	0.00585815
ARL6IP4	0.0390399	0.857487	-0.133292	0.792971	0.194923	0.368373	0.25602	0.542842	-0.0942523	0.650425	0.233963	0.264017	0.295059	0.126694
ARL6IP5	0.0635117	0.445793	-0.105653	0.511436	-0.187563	0.0255404	-0.0696854	0.707438	-0.0421418	0.623008	-0.124052	0.145081	-0.00617376	0.94452
ARL6IP6	0.540076	1.67182e-07	-0.120377	0.545448	-0.44575	1.83743e-05	-0.163792	0.403664	0.419699	2.51227e-05	0.0943258	0.376626	0.376285	0.000118791
ARL8A	0.379531	1.43633e-10	-0.157958	0.0350482	-0.295344	3.19923e-07	-0.072433	0.516667	0.221573	3.45723e-05	0.0841864	0.127781	0.307098	3.9988e-08
ARL8B	0.305883	0.001847	-0.0276336	0.932099	-0.170297	0.104988	0.0530231	0.824943	0.27825	0.004631	0.135586	0.197924	0.358906	0.000275461
ARMC1	0.0650031	0.616608	0.0143573	0.97496	0.0351426	0.818236	-0.095103	0.737538	0.0793605	0.540011	0.100146	0.464065	-0.0300999	0.822521
ARMC10	-0.156694	0.000771892	0.0975296	0.203223	0.157634	0.00121714	0.0860003	0.342031	-0.0591647	0.210732	0.000939996	0.988229	-0.070694	0.127034
ARMC2	-1.29579	3.91706e-10	-0.0898061	0.870879	-0.401742	0.038256	-0.185967	0.655695	-1.3856	5.59237e-11	-1.69754	8.52007e-14	-1.48176	4.76056e-12
ARMC3	-1.1001	5.32889e-09	-0.0205151	0.97496	-0.489861	0.00640035	-0.0673645	0.881299	-1.12062	3.49114e-09	-1.58996	7.18084e-14	-1.16747	8.7904e-10
ARMC4	-0.952886	2.84384e-09	-0.130964	0.705642	-0.746652	2.42537e-06	-0.13937	0.674289	-1.08385	7.23151e-11	-1.69954	9.26415e-18	-1.09226	4.26204e-11
ARMC5	0.180324	0.0108505	-0.0248329	0.914229	-0.181472	0.0149047	0.0609298	0.713012	0.155491	0.0288251	-0.00114811	0.989927	0.241253	0.000692009
ARMC6	-0.149009	0.0219601	0.129309	0.241727	0.111465	0.111415	0.0253644	0.883304	-0.0196994	0.78455	-0.0375437	0.619251	-0.123644	0.0566865
ARMC7	0.125041	0.0594188	-0.0942841	0.468498	-0.0468435	0.542917	0.0170844	0.92785	0.0307568	0.667748	0.0781974	0.278214	0.142125	0.0307395
ARMC8	0.5285	3.65183e-13	-0.0467426	0.761575	-0.319415	1.40921e-06	0.0345169	0.816082	0.481758	9.1433e-12	0.209085	0.000844304	0.563017	2.89089e-14
ARMC9	-0.522247	1.19438e-06	-0.193252	0.272796	-0.430623	8.07931e-05	-0.0960428	0.683762	-0.715499	5.26558e-10	-0.952871	6.26516e-14	-0.61829	2.20789e-08
ARMCX1	0.995821	1.80403e-09	-0.432741	0.0466026	-0.900076	7.74802e-08	-0.133162	0.700532	0.56308	0.000203186	0.0957444	0.575669	0.862658	6.44802e-08
ARMCX2	-0.203324	0.0778863	0.091752	0.75077	0.497494	5.39424e-05	-0.051619	0.859528	-0.111572	0.349463	0.29417	0.0136925	-0.254943	0.0255316
ARMCX3	-0.064221	0.371101	0.0631212	0.702823	0.291169	8.58013e-05	-0.0492582	0.764988	-0.00109988	0.988857	0.226948	0.00160864	-0.113479	0.101855
ARMCX4	-0.187277	0.0605474	0.271166	0.0670317	0.245349	0.0191512	0.0949943	0.67711	0.0838891	0.420257	0.0580717	0.61455	-0.0922827	0.366874
ARMCX5	0.143738	0.0370843	0.00927095	0.972268	0.0594872	0.450284	-0.0522977	0.748596	0.153009	0.0270427	0.203225	0.00447115	0.09144	0.18876
ARMCX5-GPRASP2	0.277616	0.0258746	0.0574256	0.881279	0.00353135	0.984183	0.0977908	0.736808	0.335041	0.00743004	0.281147	0.0309867	0.375407	0.00254535
ARMCX6	0.117819	0.0932517	-0.0583037	0.73527	0.01612	0.856455	0.0556806	0.731098	0.0595158	0.41451	0.13394	0.0682395	0.1735	0.0123757
ARMH1	-1.11816	6.53157e-10	0.0380696	0.946397	-0.472522	0.00523095	-0.0840139	0.832869	-1.08009	1.85344e-09	-1.59069	7.83908e-15	-1.20218	6.11365e-11
ARMH3	0.220422	6.1619e-08	-0.0160777	0.890609	-0.0237492	0.592985	0.0146936	0.883304	0.204345	3.72959e-07	0.196673	1.29768e-06	0.235116	1.04874e-08
ARMH4	-0.898526	5.1213e-07	0.0769711	0.882635	-0.182266	0.333765	-0.13196	0.737481	-0.821555	3.34198e-06	-1.08079	9.963e-09	-1.03049	1.78115e-08
ARMT1	0.0695319	0.49774	0.00925544	0.979698	-0.0303988	0.803537	-0.0761586	0.737788	0.0787873	0.442248	0.0391331	0.7382	-0.00662676	0.951408
ARNT	-0.0473649	0.584127	-0.061247	0.770526	0.131132	0.136814	-0.0951696	0.59791	-0.108612	0.192508	0.0837667	0.351036	-0.142535	0.0801839
ARNT2	-0.54135	0.00133642	0.182999	0.619185	0.457449	0.0094905	-0.103943	0.797727	-0.35835	0.0334785	-0.0839011	0.671247	-0.645293	0.00014543
ARNTL	0.0128376	0.899964	-0.074621	0.736511	0.0228129	0.841542	-0.12762	0.508211	-0.0617834	0.517247	0.0356505	0.7413	-0.114782	0.20701
ARNTL2	0.617746	1.11699e-07	-0.125215	0.584082	-0.187542	0.10734	0.142933	0.546602	0.492531	1.20787e-05	0.430204	0.000151643	0.760679	3.96756e-10
ARPC1A	-0.204266	0.000142763	-0.0430516	0.743851	0.124936	0.0246166	-0.0336093	0.791163	-0.247318	6.86326e-06	-0.0793304	0.159922	-0.237875	1.19099e-05
ARPC1B	-0.235278	0.00134461	-0.110536	0.428671	-0.098614	0.217964	0.00769567	0.971432	-0.345814	5.60343e-06	-0.333892	1.58453e-05	-0.227582	0.00179091
ARPC2	0.106068	0.0463139	0.00615108	0.97496	-0.0427944	0.483281	0.140476	0.106839	0.112219	0.0356472	0.063274	0.274622	0.246545	7.25672e-06
ARPC3	0.0456284	0.482622	0.0614361	0.664896	0.0949546	0.157695	0.0739271	0.591151	0.107064	0.0871839	0.140583	0.0297668	0.119555	0.0525998
ARPC4	0.110489	0.154618	-0.0303061	0.901709	-0.050524	0.573335	0.0951464	0.573593	0.0801831	0.312161	0.0599652	0.489015	0.205636	0.00704176
ARPC5	0.394555	1.74723e-08	-0.110822	0.337023	-0.271647	7.62606e-05	0.0209475	0.907027	0.283733	1.92423e-05	0.122907	0.0687286	0.415502	3.79693e-09
ARPC5L	0.31057	3.02877e-05	0.0218951	0.927253	-0.170275	0.0256468	0.19151	0.106225	0.332465	9.99274e-06	0.140294	0.0654401	0.50208	5.6194e-10
ARPIN	-0.383615	2.13134e-06	-0.00814515	0.977641	0.314267	0.000134388	-0.0526393	0.776417	-0.39176	1.48141e-06	-0.0693476	0.420289	-0.436254	1.19189e-07
ARPP19	-0.0960697	0.270254	0.0187723	0.951655	0.0119473	0.916212	-0.0411908	0.846246	-0.0772974	0.383228	-0.0841224	0.371429	-0.137261	0.107354
ARRB1	-0.463027	0.000125829	0.0387898	0.921479	0.566123	1.0291e-05	-0.0951321	0.728929	-0.424238	0.000421102	0.103095	0.436319	-0.558159	5.44692e-06
ARRB2	-0.724274	1.91596e-10	0.289912	0.0475073	0.966644	1.33458e-13	0.0552618	0.823102	-0.434363	2.60548e-05	0.24237	0.0199964	-0.669012	1.56999e-09
ARRDC1	0.105831	0.158815	-0.00469219	0.985612	-0.0218973	0.814776	0.0467955	0.792884	0.101139	0.182051	0.0839336	0.30098	0.152626	0.0387452
ARRDC1-AS1	-0.0335119	0.784471	0.0469568	0.892831	0.0688048	0.599365	-0.11238	0.65617	0.0134449	0.916865	0.0352929	0.796394	-0.145892	0.193281
ARRDC2	0.409692	0.00161769	-0.253045	0.25069	-0.319635	0.0188278	-0.111449	0.712734	0.156647	0.23814	0.0900563	0.542714	0.298243	0.0203081
ARRDC3	1.15172	1.55344e-12	0.0240387	0.962196	-0.391976	0.00642248	-0.115794	0.715331	1.17576	8.19587e-13	0.759746	3.39744e-07	1.03593	3.9364e-11
ARRDC3-AS1	-0.710023	1.26398e-06	0.157874	0.597178	-0.103429	0.520665	0.153932	0.62344	-0.552149	0.000105693	-0.813452	1.02226e-07	-0.556091	8.41693e-05
ARRDC4	0.101235	0.464416	0.218259	0.36966	0.241242	0.0876445	0.0268678	0.943081	0.319493	0.0158675	0.342477	0.01252	0.128102	0.344002
ARSA	0.527944	2.06391e-11	-0.0406774	0.830988	-0.149449	0.0372433	0.0283897	0.871671	0.487267	2.61803e-10	0.378495	3.05906e-07	0.556334	2.94821e-12
ARSB	0.27375	0.00124583	-0.0121447	0.970008	-0.0207489	0.846553	-0.143977	0.399604	0.261605	0.0020697	0.253001	0.00379231	0.129774	0.124539
ARSD	-0.0695812	0.25584	0.00190594	0.991759	0.0114054	0.883827	0.0487395	0.725441	-0.0676752	0.272765	-0.0581758	0.380041	-0.0208416	0.748644
ARSD-AS1	0.105156	0.665423	-0.349216	0.414805	-0.140309	0.598303	0.0217985	0.974544	-0.244059	0.295604	-0.035153	0.902016	0.126955	0.595906
ARSEP1	-0.236815	0.223952	0.0115962	0.985612	-0.325896	0.112947	-0.167649	0.706583	-0.225219	0.251806	-0.562711	0.00451355	-0.404465	0.033306
ARSG	0.311281	0.0402698	0.404209	0.0748322	-0.207394	0.21241	0.240509	0.446885	0.71549	6.17508e-06	0.103887	0.550078	0.55179	0.000308927
ARSH	0.0822241	0.752494	0.612136	0.0880445	-0.0343263	0.913783	0.469063	0.303571	0.69436	0.00368613	0.0478977	0.872731	0.551288	0.0196954
ARSI	-0.169664	0.432918	-0.247918	0.567306	-0.196426	0.402879	-0.177147	0.714706	-0.417582	0.0451138	-0.36609	0.0946858	-0.346811	0.0941785
ARSJ	0.205801	0.0659552	0.0424899	0.905907	0.0570953	0.669249	0.0611832	0.823944	0.248291	0.0266618	0.262897	0.0238393	0.266984	0.0160436
ARSK	-0.230444	0.00934789	-0.0801928	0.706193	-0.0301229	0.783556	-0.0706303	0.731248	-0.310637	0.000554001	-0.260567	0.00462778	-0.301074	0.000720994
ARTN	-0.480156	0.00285026	0.176162	0.616471	1.09678	3.78703e-09	0.203315	0.565935	-0.303995	0.0602448	0.616621	0.000240126	-0.276842	0.0845049
ARV1	0.164465	0.0108975	0.0277305	0.890278	0.162619	0.0168135	-0.0410267	0.791879	0.192195	0.00313018	0.327084	2.3975e-06	0.123438	0.0553849
ARX	-0.687044	0.00299673	-0.00321114	0.996505	-0.18562	0.484111	-0.269322	0.598288	-0.690255	0.00297914	-0.872664	0.000298845	-0.956366	4.90066e-05
ASAH1	-0.0795216	0.213797	0.0143671	0.949208	0.309166	5.97255e-06	0.0246604	0.882171	-0.0651545	0.316291	0.229644	0.000456439	-0.0548612	0.396598
ASAH2	0.805754	1.44043e-06	-0.0713262	0.884587	-0.594507	0.000415991	0.0400134	0.92985	0.734428	8.97521e-06	0.211247	0.218227	0.845767	4.6893e-07
ASAH2B	0.82804	3.6992e-13	-0.124701	0.513646	-0.549733	1.92303e-07	0.118349	0.570031	0.70334	8.65065e-11	0.278307	0.00447834	0.946389	2.03164e-15
ASAP1	0.370353	0.00359706	-0.290483	0.150634	-0.36198	0.00669676	-0.147877	0.598473	0.0798694	0.555096	0.0083731	0.959751	0.222476	0.0795823
ASAP2	0.463478	0.000355672	-0.220061	0.341709	-0.378631	0.00491057	-0.13081	0.65358	0.243417	0.0593252	0.0848467	0.564173	0.332668	0.00901308
ASAP3	0.257804	7.55774e-05	-0.0563526	0.714444	0.184491	0.00585491	0.0260182	0.875541	0.201451	0.0017209	0.442295	1.07369e-09	0.283822	1.46884e-05
ASB1	-0.744817	2.04217e-16	0.0947461	0.495259	0.182619	0.0125542	0.0218653	0.911043	-0.65007	4.19649e-14	-0.562197	9.7175e-12	-0.722951	4.92829e-16
ASB11	0.174259	0.379763	0.051762	0.936349	0.45549	0.023835	-0.238318	0.572217	0.226021	0.250741	0.629749	0.00152581	-0.0640595	0.758991
ASB13	-0.408601	1.55585e-06	0.0608206	0.770372	0.367405	2.48215e-05	-0.0330088	0.875692	-0.34778	3.08805e-05	-0.0411954	0.665525	-0.441609	2.6642e-07
ASB14	-0.502365	0.00101964	0.284623	0.280716	0.158605	0.351984	0.307837	0.283775	-0.217742	0.159508	-0.343759	0.030217	-0.194528	0.205038
ASB16-AS1	0.180861	0.0577852	0.0307345	0.921994	-0.0419656	0.71684	-0.101636	0.636147	0.211596	0.0266461	0.138896	0.17284	0.0792247	0.420322
ASB2	0.661674	0.00666991	0.011026	0.989251	0.249951	0.361854	-0.162965	0.781858	0.6727	0.0060204	0.911625	0.00034398	0.498709	0.0399718
ASB3	-0.191243	0.14354	0.120841	0.692709	0.100479	0.500527	0.20915	0.433527	-0.0704023	0.612467	-0.090764	0.539493	0.017907	0.900884
ASB4	-0.712244	0.00271023	0.37113	0.406449	0.605281	0.0151692	0.176781	0.754092	-0.341114	0.157772	-0.106963	0.703607	-0.535463	0.0229479
ASB6	0.170939	0.000339923	-0.0391186	0.735905	-0.168465	0.000713268	-0.00861041	0.949243	0.13182	0.00530412	0.00247339	0.967611	0.162328	0.000599125
ASB7	0.421517	2.7836e-07	-0.114824	0.439302	-0.274969	0.000725551	-0.112415	0.495802	0.306693	9.92885e-05	0.146548	0.0705817	0.309102	7.81517e-05
ASB8	0.112665	0.0749263	-0.0526033	0.73527	-0.0342345	0.649258	0.0590274	0.684696	0.0600614	0.358986	0.0784303	0.251366	0.171692	0.00617251
ASB9	-1.34397	2.46071e-10	-0.185747	0.664766	0.0473173	0.841974	0.0339718	0.949513	-1.52972	4.46018e-12	-1.29665	1.13738e-09	-1.31	4.29991e-10
ASCC1	-0.093101	0.0132276	-0.00975243	0.940223	-0.0140875	0.760392	0.0410882	0.626555	-0.102853	0.0064495	-0.107189	0.00600405	-0.0520128	0.17002
ASCC2	-0.0183615	0.816699	0.0150056	0.953471	0.140554	0.0627552	0.0735062	0.647379	-0.00335586	0.967474	0.122193	0.104152	0.0551448	0.454508
ASCC3	-0.106196	0.398229	0.0982884	0.745124	0.216566	0.0947743	-0.00986858	0.979017	-0.00790804	0.954708	0.11037	0.413205	-0.116065	0.349821
ASCL1	0.183199	0.35657	0.187001	0.675102	0.308575	0.137331	-0.168928	0.706278	0.3702	0.0557378	0.491774	0.0137502	0.0142709	0.946777
ASCL2	1.64931	1.05297e-11	0.0509995	0.944367	-0.919616	3.74777e-05	0.289611	0.516667	1.70031	4.16504e-12	0.729691	0.000731604	1.93892	2.94829e-14
ASCL3	0.27844	0.141641	-0.220192	0.575815	-0.067938	0.768091	-0.0542476	0.919265	0.0582484	0.778715	0.210502	0.304791	0.224192	0.238237
ASF1A	0.379996	4.43767e-08	-0.00168945	0.992764	0.0860201	0.221877	-0.0343489	0.827239	0.378307	5.26208e-08	0.466016	2.79883e-10	0.345647	3.55072e-07
ASF1B	-0.0170321	0.929366	0.056888	0.918076	0.238188	0.196111	0.13672	0.727258	0.0398559	0.833257	0.221156	0.224927	0.119688	0.496477
ASGR1	-0.14515	0.587868	0.0647588	0.940786	0.322252	0.246375	-0.0621671	0.931627	-0.0803909	0.773031	0.177102	0.539445	-0.207317	0.427359
ASH1L	0.00123726	0.993226	-0.106672	0.711558	0.053684	0.710861	-0.0995197	0.719243	-0.105434	0.397504	0.0549213	0.697508	-0.0982824	0.426273
ASH1L-AS1	0.315223	0.0209083	-0.121886	0.711573	-0.312841	0.0300146	-0.167363	0.579011	0.193337	0.165286	0.00238192	0.989492	0.14786	0.288292
ASH2L	0.390187	1.0869e-14	-0.0314164	0.760015	-0.238895	1.30919e-07	0.0231618	0.815805	0.358771	2.49624e-13	0.151292	0.000330883	0.413349	8.73011e-16
ASIC1	-1.84876	2.16883e-18	-0.0528785	0.916061	0.76788	5.22156e-06	0.0238134	0.958004	-1.90164	7.83817e-19	-1.08088	9.21391e-10	-1.82495	2.78375e-18
ASIC3	0.0534816	0.815759	-0.0765124	0.908766	0.0707123	0.780529	-0.359577	0.384838	-0.0230308	0.922639	0.124194	0.601753	-0.306095	0.137916
ASL	-0.313412	0.000324488	0.015142	0.962166	-0.0122269	0.915173	-0.0175965	0.942764	-0.29827	0.000620834	-0.325639	0.000290528	-0.331009	0.000144588
ASMTL	-0.0783525	0.328956	0.0931545	0.567306	0.209742	0.0104428	0.024967	0.909403	0.014802	0.867681	0.13139	0.112062	-0.0533855	0.512397
ASMTL-AS1	0.283356	0.156761	-0.0799405	0.898686	0.1676	0.458417	0.0519098	0.926951	0.203416	0.320191	0.450957	0.0289358	0.335266	0.0897986
ASNA1	-0.25244	0.00195236	-0.00849251	0.97807	0.0640754	0.492341	0.118963	0.494163	-0.260933	0.00145078	-0.188365	0.0261553	-0.133477	0.100366
ASNS	0.586697	0.0022601	0.192754	0.658592	-0.546935	0.00657271	0.369064	0.320434	0.779451	7.20982e-05	0.039762	0.868758	0.955761	1.78768e-06
ASNSD1	-0.104801	0.00839836	0.095432	0.124738	0.176827	3.5557e-05	-0.0444376	0.619394	-0.00936879	0.83357	0.0720263	0.0864106	-0.149238	0.000205577
ASPG	0.548939	0.0409294	0.0729779	0.935828	-0.100756	0.759893	0.492038	0.351894	0.621917	0.0209499	0.448183	0.115861	1.04098	0.00012983
ASPH	0.872917	1.06735e-09	-0.0933685	0.778563	-0.173546	0.21601	-0.0545375	0.869511	0.779549	2.33347e-08	0.699371	4.74841e-07	0.81838	5.26768e-09
ASPHD1	-0.219204	0.229582	0.033309	0.960445	0.294988	0.126148	-0.00234002	0.995992	-0.185895	0.315212	0.0757839	0.72324	-0.221544	0.22095
ASPHD2	0.911404	2.05111e-08	-0.217773	0.453262	-0.718935	8.76376e-06	0.0299537	0.944112	0.693631	7.95006e-06	0.192469	0.232829	0.941358	7.57417e-09
ASPM	-0.61939	0.00117008	0.384995	0.227902	0.98123	2.30293e-06	0.262664	0.520807	-0.234395	0.228149	0.36184	0.0698634	-0.356726	0.059024
ASPRV1	0.199184	0.27027	0.159751	0.705642	-0.288349	0.130054	-0.0552425	0.911511	0.358934	0.0432161	-0.0891657	0.668056	0.143941	0.431127
ASPSCR1	-0.0481874	0.568915	0.127219	0.394594	0.157558	0.0637248	0.065392	0.722958	0.0790312	0.340116	0.10937	0.203419	0.0172046	0.845363
ASRGL1	-0.969875	2.23726e-10	0.191035	0.471426	1.1585	4.98857e-12	-0.0419996	0.912014	-0.77884	8.39484e-08	0.188623	0.192724	-1.01187	4.93812e-11
ASS1	0.627022	2.84087e-13	-0.0873429	0.553709	-0.245909	0.00102805	0.0879727	0.574021	0.539679	4.58181e-11	0.381113	7.00451e-07	0.714995	1.67905e-15
ASS1P9	0.262713	0.198613	-0.0080718	0.990012	0.0922534	0.704212	0.0457596	0.936156	0.254641	0.216	0.354966	0.0949264	0.308472	0.125915
ASTE1	0.0557325	0.455616	0.0196429	0.935174	0.016706	0.854654	-0.100391	0.513223	0.0753754	0.307016	0.0724385	0.35735	-0.0446589	0.552417
ASTN1	-0.963862	9.62307e-05	0.223939	0.697744	-0.0500981	0.873342	0.0599626	0.93115	-0.739923	0.00241759	-1.01396	6.84459e-05	-0.903899	0.000219767
ASTN2	-1.08694	4.77939e-14	0.209014	0.314992	0.0311591	0.833456	-0.0100874	0.977368	-0.877923	7.01583e-11	-1.05578	2.1619e-13	-1.09702	2.60303e-14
ASXL1	-0.195529	0.00094971	-0.0361829	0.824565	0.162222	0.00856228	-0.115959	0.302546	-0.231712	0.000114033	-0.0333068	0.625381	-0.311487	5.00679e-07
ASXL2	-0.0355669	0.810319	-0.0114606	0.980911	-0.0184453	0.917172	-0.131037	0.665636	-0.0470275	0.747348	-0.0540122	0.735078	-0.166604	0.215702
ASXL3	-0.0801242	0.63919	-0.497303	0.030036	0.104401	0.57683	-0.604409	0.00767709	-0.577427	0.000371895	0.0242771	0.904073	-0.684533	2.81028e-05
ATAD1	0.461854	3.87483e-08	-0.0691721	0.711573	-0.267095	0.00109583	-0.0725851	0.684696	0.392682	1.54971e-06	0.194759	0.0156971	0.389269	1.58683e-06
ATAD2	0.0313143	0.814586	0.0373397	0.924738	0.248453	0.0499781	-0.124615	0.645024	0.068654	0.591968	0.279767	0.0248206	-0.0933006	0.452514
ATAD2B	0.564376	9.42979e-06	-0.0901156	0.777731	-0.289021	0.0256202	-0.117784	0.675692	0.47426	0.000155529	0.275355	0.0319992	0.446591	0.000310346
ATAD3A	-0.405936	3.72491e-06	0.129311	0.418408	0.294252	0.000911253	0.0637114	0.748848	-0.276624	0.0011203	-0.111684	0.218178	-0.342224	6.32642e-05
ATAD3B	0.0122572	0.91353	0.151933	0.420643	0.247364	0.0176408	0.0893337	0.697078	0.164191	0.101747	0.259621	0.0116134	0.101591	0.315819
ATAD3C	0.283925	0.0314818	-0.0188053	0.970305	-0.131925	0.375245	-0.0393411	0.91635	0.265119	0.0460209	0.152	0.292021	0.244584	0.0632804
ATAD5	0.157018	0.433439	-0.125455	0.807977	-0.0455588	0.852219	-0.078236	0.875979	0.031563	0.88627	0.111459	0.616486	0.0787821	0.703346
ATAT1	-0.366502	2.98729e-05	0.123124	0.461526	0.398255	1.5684e-05	-0.0360976	0.870522	-0.243377	0.00453526	0.0317533	0.758532	-0.402599	5.30775e-06
ATE1	-0.105455	0.380057	0.109444	0.688744	0.15685	0.217161	-0.019747	0.952378	0.00398952	0.975972	0.0513953	0.708304	-0.125202	0.288902
ATE1-AS1	-0.26428	0.14903	-0.25551	0.474798	-0.307971	0.114059	0.118433	0.78521	-0.51979	0.00429251	-0.572251	0.00233014	-0.145847	0.437478
ATF1	0.15311	0.121885	-0.0145768	0.969786	-0.0655191	0.567384	-0.104152	0.638901	0.138534	0.166164	0.0875912	0.423471	0.0489581	0.640354
ATF2	0.0236017	0.870374	-0.0656042	0.861928	-0.0640958	0.675382	-0.189221	0.488542	-0.0420025	0.765345	-0.0404941	0.796885	-0.16562	0.199517
ATF3	1.31372	7.1901e-11	-0.509899	0.0473056	-1.60667	7.73022e-13	0.00492362	0.991207	0.803822	1.06979e-05	-0.292951	0.116345	1.31864	5.13873e-11
ATF4	0.706923	6.30741e-13	-0.00925024	0.974961	-0.27046	0.00170276	0.0693046	0.715331	0.697673	1.06244e-12	0.436464	8.06167e-07	0.776228	1.64783e-14
ATF4P3	0.48612	0.00425499	-0.0809947	0.87609	-0.119859	0.54457	0.166981	0.666791	0.405126	0.0174352	0.366261	0.0394199	0.653102	0.000146414
ATF4P4	0.187772	0.420029	0.0050255	0.993605	-0.121207	0.649742	0.0295764	0.963962	0.192797	0.408905	0.0665647	0.809216	0.217348	0.342846
ATF5	1.27192	1.33859e-15	-0.0298412	0.945809	-0.54081	5.25934e-05	0.107798	0.711848	1.24208	3.79345e-15	0.73111	9.40639e-08	1.37972	3.77444e-17
ATF6	0.105548	0.0501921	0.0541914	0.658434	-0.0105995	0.879415	0.076647	0.504411	0.159739	0.00316522	0.0949482	0.0951955	0.182195	0.000737307
ATF6B	0.0589317	0.253198	-0.0846682	0.358181	-0.0890517	0.0996024	-0.0652231	0.55494	-0.0257365	0.635838	-0.03012	0.60638	-0.00629141	0.910559
ATF7	0.355388	3.63721e-07	-0.0684374	0.643245	-0.153507	0.0266531	-0.0257573	0.882359	0.28695	2.36543e-05	0.201881	0.00305799	0.32963	1.60622e-06
ATF7IP	0.386158	0.000641321	0.0643787	0.840799	0.0133678	0.92941	-0.0562066	0.839693	0.450537	8.63436e-05	0.399526	0.000615791	0.329951	0.00312676
ATF7IP2	-0.781431	3.06151e-08	-0.151482	0.579948	-0.277204	0.0439159	-0.207544	0.442139	-0.932913	2.62433e-10	-1.05864	7.36564e-12	-0.988976	3.31775e-11
ATG10	-0.305222	0.000384794	0.111461	0.516969	0.159814	0.0778962	0.0562596	0.783871	-0.193761	0.02296	-0.145407	0.106139	-0.248962	0.00325672
ATG101	0.00110992	0.99063	0.00526996	0.984532	-0.0604917	0.503272	0.0558865	0.764364	0.00637988	0.943789	-0.0593818	0.504122	0.0569964	0.48496
ATG12	0.384786	3.00563e-07	-0.0217796	0.925734	-0.206865	0.00523161	-0.0314758	0.860573	0.363007	1.11517e-06	0.177921	0.0152087	0.353311	1.65183e-06
ATG13	0.176059	5.53645e-07	-0.055348	0.363293	0.00339751	0.940056	-0.0312283	0.683762	0.120711	0.000342496	0.179457	5.99982e-07	0.144831	2.06805e-05
ATG14	0.130413	0.120717	-0.0578632	0.792711	-0.0685383	0.47327	-0.113364	0.531047	0.0725501	0.404526	0.061875	0.513163	0.0170494	0.853245
ATG16L1	0.307053	4.34961e-08	-0.000280073	0.998961	-0.0678375	0.233471	-0.0364475	0.767199	0.306773	4.74043e-08	0.239215	1.34725e-05	0.270605	6.93463e-07
ATG16L2	-0.602759	6.59179e-06	0.0347851	0.936349	0.926808	8.91809e-10	-0.0666323	0.834367	-0.567974	1.98022e-05	0.324048	0.0153864	-0.669392	7.57772e-07
ATG2A	0.225347	0.000803255	-0.00780949	0.97496	0.0656604	0.382744	-0.0160969	0.932931	0.217538	0.00123521	0.291008	3.57365e-05	0.209251	0.00168605
ATG2B	-0.335722	0.00268348	1.28402e-06	0.99999	0.235005	0.0467861	-0.169149	0.470493	-0.335721	0.00278617	-0.100717	0.417873	-0.504871	1.1159e-05
ATG3	0.253985	7.67289e-07	0.00702312	0.970008	-0.134596	0.00839967	0.0558404	0.605711	0.261008	4.51699e-07	0.119389	0.0182808	0.309825	5.80345e-09
ATG4A	-0.332599	2.17664e-07	0.161322	0.072579	0.243707	0.000142008	0.0440265	0.757577	-0.171277	0.00454316	-0.0888913	0.16693	-0.288572	3.76756e-06
ATG4B	0.155833	0.0070572	-0.0653341	0.599564	-0.0026328	0.974045	0.0662251	0.608019	0.0904988	0.123541	0.1532	0.0107304	0.222058	0.000149639
ATG4C	-0.145678	0.130055	-0.00551228	0.985834	0.0720394	0.513184	-0.148207	0.459135	-0.15119	0.118221	-0.0736383	0.49473	-0.293884	0.00201887
ATG4D	0.112181	0.167521	0.0351173	0.887922	0.0848954	0.345608	0.0580938	0.760624	0.147298	0.0688717	0.197076	0.018339	0.170274	0.0328754
ATG5	0.0247306	0.550936	-0.0025909	0.984893	0.00432519	0.934981	-0.0151217	0.885668	0.0221397	0.598924	0.0290557	0.514972	0.00960888	0.824318
ATG7	0.526142	3.69559e-14	0.000736556	0.996745	-0.279363	5.05775e-06	0.0735319	0.549852	0.526879	3.8002e-14	0.246779	3.28977e-05	0.599674	1.76135e-16
ATG9A	0.0226902	0.726752	-0.00281079	0.988941	0.162614	0.00929776	-0.0369106	0.797597	0.0198794	0.761326	0.185304	0.0026754	-0.0142204	0.828357
ATG9B	-0.692343	0.000251073	0.0495649	0.93779	0.0648317	0.778009	0.0808944	0.864939	-0.642778	0.000660948	-0.627511	0.00119141	-0.611448	0.0010538
ATIC	-0.0349729	0.644124	0.211286	0.039854	0.2814	0.000183936	0.108333	0.465439	0.176313	0.0128912	0.246428	0.000805386	0.0733606	0.309983
ATL1	0.0842771	0.313712	-0.19503	0.124738	-0.458228	3.89264e-07	-0.15896	0.310384	-0.110752	0.182249	-0.373951	1.44365e-05	-0.0746833	0.371409
ATL2	0.299672	0.0166462	0.0521933	0.894041	0.100614	0.484283	-0.0960432	0.744574	0.351865	0.00515582	0.400285	0.0020787	0.203628	0.104544
ATL3	0.229074	0.0155099	-0.0811284	0.726336	-0.208693	0.0372108	0.0694684	0.757577	0.147945	0.124315	0.0203806	0.863371	0.298542	0.00162123
ATM	-0.277206	0.0202733	0.0139159	0.97496	0.310157	0.0136115	-0.176904	0.488843	-0.263291	0.0282402	0.0329509	0.8233	-0.45411	0.000172943
ATMIN	0.236828	0.000239383	0.0124216	0.959197	-0.0246538	0.75209	0.0324093	0.836457	0.24925	0.000123343	0.212174	0.00130185	0.269237	3.3679e-05
ATN1	0.0953558	0.112608	-0.124285	0.209994	0.0246128	0.736312	-0.0383337	0.789166	-0.0289291	0.653167	0.119969	0.0552704	0.0570221	0.351162
ATOH8	0.739181	2.89235e-06	-0.206422	0.492426	-0.137919	0.421462	-0.267822	0.376351	0.53276	0.000505368	0.601262	0.000144892	0.47136	0.00178081
ATOX1	-0.0907892	0.434503	0.0490335	0.887049	0.0955409	0.451972	0.167985	0.474319	-0.0417557	0.731556	0.00475178	0.973837	0.0771959	0.506554
ATP10A	2.89242	1.45397e-15	-0.424557	0.437522	-1.76555	4.16048e-08	0.0046219	0.995147	2.46786	5.59452e-13	1.12687	0.00015298	2.89704	1.03316e-15
ATP10B	1.75008	9.89921e-17	0.102079	0.81643	0.0553513	0.78026	0.122561	0.746394	1.85216	1.12527e-17	1.80543	5.49096e-17	1.87264	4.3107e-18
ATP10D	0.335466	0.00399845	-0.154122	0.512465	-0.302912	0.0133489	-0.132207	0.612159	0.181344	0.125302	0.0325537	0.820863	0.203259	0.0805505
ATP11A	-0.187776	0.120454	0.138803	0.582788	0.34541	0.00609998	-0.0409087	0.902883	-0.0489722	0.7079	0.157635	0.223306	-0.228684	0.055528
ATP11B	-0.0561957	0.642012	0.00860425	0.983189	0.0214729	0.88403	-0.0367999	0.907048	-0.0475914	0.698848	-0.0347227	0.802729	-0.0929955	0.426047
ATP11C	0.238986	0.0921447	-0.0209174	0.969791	-0.172836	0.267423	-0.098474	0.769307	0.218069	0.128436	0.0661505	0.691443	0.140512	0.330758
ATP12A	-0.346626	0.284969	1.15749	0.00784933	1.85871	1.53002e-07	1.24961	0.00501874	0.810862	0.0105308	1.51208	7.0711e-06	0.902979	0.00413149
ATP13A1	0.564495	3.61948e-15	-0.122616	0.186994	-0.432197	1.85535e-10	0.0151073	0.925994	0.44188	2.16173e-11	0.132299	0.0254112	0.579603	9.65443e-16
ATP13A2	0.166964	0.0253975	-0.0982785	0.515757	-0.00675522	0.948037	0.0579732	0.739928	0.0686851	0.37744	0.160208	0.0406298	0.224937	0.00255759
ATP13A3	-0.135233	0.499937	-0.135469	0.787055	0.015551	0.952246	-0.240512	0.566985	-0.270703	0.164127	-0.119682	0.586328	-0.375746	0.0478946
ATP13A4	0.845452	8.65089e-09	-0.24583	0.294887	-0.410392	0.00352413	-0.143432	0.634154	0.599622	1.54628e-05	0.435059	0.00173917	0.702019	6.36471e-07
ATP13A5	-0.544285	0.00976441	0.108793	0.861026	0.756755	0.000687468	0.125193	0.808275	-0.435491	0.0399185	0.21247	0.361144	-0.419091	0.0458859
ATP1A1	-0.273183	2.09552e-05	-0.151815	0.115974	0.0772209	0.261246	0.0104357	0.952771	-0.424998	1.12678e-09	-0.195962	0.00242145	-0.262747	3.62326e-05
ATP1A1-AS1	-0.203336	0.0922558	0.105406	0.716779	0.0268888	0.861175	0.115276	0.675656	-0.09793	0.437089	-0.176448	0.170141	-0.08806	0.481177
ATP1A3	0.24545	0.259824	-0.475499	0.165437	-0.115487	0.649742	-0.0573078	0.925238	-0.230049	0.295424	0.129964	0.597332	0.188142	0.39088
ATP1B1	0.787604	4.17209e-12	-0.138172	0.465517	-0.422979	4.36557e-05	-0.139012	0.499392	0.649433	1.62402e-09	0.364626	0.00029339	0.648592	1.32693e-09
ATP1B3	-0.26363	0.0294943	0.134587	0.610293	0.427157	0.000847387	0.117288	0.673161	-0.129043	0.302726	0.163526	0.210797	-0.146343	0.233459
ATP23	-0.506884	0.000133213	0.103535	0.751956	0.35666	0.00918253	-0.00737138	0.984993	-0.403349	0.00212102	-0.150224	0.290812	-0.514256	0.000100287
ATP2A1	-0.0256018	0.898156	-0.187369	0.632827	-0.107808	0.604458	0.0644398	0.894566	-0.212971	0.239521	-0.13341	0.504863	0.038838	0.841989
ATP2A1-AS1	-0.266126	0.243787	-0.0252688	0.974961	0.243149	0.330034	0.192444	0.712734	-0.291395	0.202135	-0.0229773	0.93636	-0.0736825	0.762209
ATP2A2	-0.165484	0.0767378	-0.0194418	0.953995	0.0405967	0.720259	-0.0661238	0.764988	-0.184926	0.0484208	-0.124888	0.213672	-0.231608	0.012331
ATP2A3	0.645985	0.000174579	0.185442	0.61676	0.749385	3.77659e-05	0.113027	0.781924	0.831427	2.83219e-06	1.39537	4.94714e-12	0.759012	1.30667e-05
ATP2B1	-0.392068	2.42261e-05	0.00763834	0.980911	0.112515	0.257872	-0.0408981	0.857567	-0.38443	3.49555e-05	-0.279553	0.00279875	-0.432966	3.76429e-06
ATP2B1-AS1	-1.03956	6.88082e-11	0.358576	0.0865163	0.606315	4.71425e-05	0.0861936	0.797457	-0.680983	2.91265e-06	-0.433244	0.00263092	-0.953365	7.47159e-10
ATP2B3	0.171009	0.4906	-0.166643	0.788301	-0.309919	0.23263	0.0320323	0.9628	0.00436602	0.98695	-0.138909	0.611825	0.203042	0.404337
ATP2B4	0.159879	0.129164	-0.172316	0.370877	-0.229661	0.0374243	-0.0328368	0.911043	-0.0124364	0.91809	-0.0697821	0.560058	0.127042	0.2295
ATP2C1	-0.182679	0.0593893	-0.140245	0.457587	-0.13977	0.184514	-0.238541	0.144937	-0.322925	0.000950472	-0.322449	0.00132032	-0.42122	2.13014e-05
ATP2C2	-0.376921	9.83091e-06	0.243683	0.0418587	0.500073	6.93502e-08	0.0174126	0.940788	-0.133238	0.110108	0.123152	0.16178	-0.359508	2.02498e-05
ATP2C2-AS1	0.148954	0.347084	0.0769773	0.866176	-0.0801423	0.662006	-0.0824526	0.826723	0.225931	0.147694	0.0688113	0.7052	0.066501	0.68652
ATP5F1A	-0.193127	0.000127542	0.0633883	0.531501	0.170928	0.00106065	0.063027	0.563402	-0.129739	0.0089617	-0.0221986	0.705421	-0.1301	0.00818758
ATP5F1AP1	0.596545	0.00378191	-0.126207	0.825447	-0.703595	0.00118788	0.122604	0.808137	0.470338	0.0227079	-0.10705	0.657808	0.719149	0.000507411
ATP5F1AP10	0.40405	0.0937335	0.48982	0.223872	0.366875	0.158543	0.095124	0.880081	0.89387	0.000249038	0.770925	0.00194822	0.499174	0.0363408
ATP5F1B	-0.140589	0.020817	0.16191	0.0756747	0.202766	0.00157868	0.149561	0.147555	0.0213207	0.749852	0.0621773	0.354047	0.00897145	0.894004
ATP5F1C	-0.004895	0.949699	0.0365754	0.850065	0.193938	0.00603373	0.127714	0.328439	0.0316804	0.663121	0.189043	0.00670474	0.122819	0.067014
ATP5F1D	-0.212953	0.0753083	0.0533654	0.884902	0.333481	0.00778392	0.154538	0.553529	-0.159588	0.190389	0.120528	0.359398	-0.0584153	0.647232
ATP5F1E	-0.10211	0.287333	0.0523041	0.845152	0.13005	0.203599	0.157873	0.407141	-0.0498056	0.620498	0.0279399	0.80881	0.0557638	0.572202
ATP5IF1	-0.434458	7.63324e-05	0.00836301	0.982822	0.0862267	0.484515	0.059076	0.823237	-0.426095	0.00010633	-0.348231	0.0017978	-0.375382	0.000510916
ATP5MC1	-0.267423	0.0235453	0.249855	0.202431	0.585877	5.24942e-06	0.194957	0.423017	-0.0175682	0.897122	0.318454	0.00942492	-0.0724659	0.560967
ATP5MC2	-0.433591	5.94263e-05	0.120106	0.593434	0.344697	0.00191332	0.113707	0.63254	-0.313485	0.00313018	-0.0888942	0.451688	-0.319884	0.00236421
ATP5MC3	-0.0813552	0.375337	0.117945	0.508525	0.250631	0.00706993	0.161263	0.358308	0.0365903	0.704826	0.169276	0.069411	0.079908	0.380527
ATP5MD	-0.0558331	0.576969	0.114141	0.563307	0.184357	0.0667162	0.179094	0.329824	0.0583079	0.562514	0.128524	0.20647	0.123261	0.196088
ATP5ME	-0.351736	0.00344526	0.122624	0.653053	0.316359	0.0121696	0.173202	0.499392	-0.229113	0.0581266	-0.0353776	0.811183	-0.178534	0.138496
ATP5MF	-0.188025	0.0685401	0.107714	0.640665	0.227572	0.0364084	0.0824237	0.729689	-0.0803108	0.457842	0.0395464	0.749785	-0.105601	0.315367
ATP5MF-PTCD1	-0.214352	0.38989	-0.0410263	0.962676	0.214514	0.432567	0.161414	0.779612	-0.255379	0.3033	0.000161263	0.999587	-0.0529387	0.841834
ATP5MG	-0.310705	0.000631927	0.0625633	0.792462	0.206781	0.0294598	0.129615	0.499631	-0.248142	0.00603717	-0.103925	0.290387	-0.181091	0.0433472
ATP5MPL	-0.287061	0.00402627	0.102498	0.650472	0.224727	0.0328103	0.146961	0.491061	-0.184562	0.0664312	-0.0623338	0.587609	-0.1401	0.162638
ATP5PB	-0.61035	2.36715e-11	0.185535	0.13441	0.460604	1.75888e-07	0.131304	0.415143	-0.424815	4.16614e-07	-0.149746	0.071118	-0.479046	2.01042e-08
ATP5PBP5	-0.820343	1.13306e-05	-0.188523	0.641651	-0.366347	0.055893	-0.0591789	0.906609	-1.00887	1.84902e-07	-1.18669	4.8514e-09	-0.879522	2.83318e-06
ATP5PD	-0.058396	0.515097	0.0656129	0.765509	0.182119	0.0437728	0.124245	0.495951	0.00721684	0.941922	0.123723	0.176243	0.0658489	0.457333
ATP5PF	-0.236388	0.00444619	0.106772	0.529924	0.259405	0.00296639	0.103835	0.571173	-0.129616	0.124407	0.0230168	0.822493	-0.132552	0.11104
ATP5PO	-0.180649	0.081398	0.124381	0.564582	0.221936	0.0421373	0.161685	0.454603	-0.0562685	0.611836	0.0412869	0.738831	-0.0189645	0.868586
ATP5S	-0.297236	2.18613e-05	0.105881	0.410081	0.266911	0.000218771	0.0585093	0.712734	-0.191355	0.00502504	-0.0303247	0.706569	-0.238726	0.000474593
ATP6AP1	0.0655743	0.234199	0.0482082	0.711573	-0.00639523	0.930139	0.0519137	0.675045	0.113783	0.0360174	0.0591791	0.317258	0.117488	0.0286582
ATP6AP1L	0.283828	0.0128129	-0.196251	0.340973	-0.301053	0.0121049	-0.0466755	0.87525	0.0875775	0.466248	-0.0172245	0.90477	0.237153	0.0368272
ATP6AP2	-0.0380087	0.609378	0.0377303	0.851346	0.140624	0.0582604	0.0438937	0.794463	-0.000278384	0.997005	0.102616	0.170432	0.00588494	0.939903
ATP6V0A1	-0.206621	0.00263632	0.134549	0.247597	0.322743	1.32598e-05	0.0848645	0.574708	-0.0720718	0.308893	0.116122	0.110289	-0.121757	0.0752169
ATP6V0A2	-0.00312523	0.960659	0.0176495	0.922579	-0.0530709	0.392738	-0.0584448	0.63797	0.0145243	0.812475	-0.0561962	0.352983	-0.0615701	0.270006
ATP6V0A4	-1.35689	6.04984e-11	-0.149014	0.738255	0.540404	0.00438369	-0.201577	0.619394	-1.5059	2.21537e-12	-0.816486	1.94033e-05	-1.55847	4.96374e-13
ATP6V0B	0.11514	0.233833	-0.0094427	0.979206	0.0929348	0.38506	0.105436	0.620636	0.105697	0.279438	0.208075	0.0357315	0.220576	0.0191443
ATP6V0C	0.0103209	0.883353	0.0745058	0.565907	0.0682647	0.32412	0.0960678	0.461537	0.0848266	0.180718	0.0785856	0.24245	0.106389	0.0862395
ATP6V0D1	-0.239782	5.79742e-05	-0.0064211	0.976063	0.0171437	0.814996	0.0441879	0.748511	-0.246203	4.00635e-05	-0.222638	0.000254142	-0.195594	0.000807784
ATP6V0D2	0.246351	0.317466	0.0900687	0.907206	-0.839116	0.000903455	0.0404616	0.952656	0.33642	0.168328	-0.592765	0.0173266	0.286813	0.237292
ATP6V0E1	-0.0519882	0.482774	-0.0361463	0.862188	0.0637213	0.427624	0.0672656	0.677498	-0.0881345	0.223104	0.0117331	0.895524	0.0152774	0.84501
ATP6V0E2	-0.701365	2.88282e-07	0.0305828	0.946046	0.424196	0.00169562	0.0798259	0.797434	-0.670782	8.06984e-07	-0.277168	0.0389789	-0.621539	3.19456e-06
ATP6V0E2-AS1	-0.84613	2.20872e-09	0.1065	0.735103	0.0935647	0.525838	-0.362402	0.0724854	-0.73963	7.51637e-08	-0.752565	7.71545e-08	-1.20853	1.59205e-14
ATP6V1A	-0.249055	0.0246503	0.0366641	0.92068	0.184587	0.12242	-0.0400738	0.896486	-0.212391	0.0573221	-0.064468	0.616277	-0.289129	0.00875909
ATP6V1B1	-1.0002	4.36712e-05	0.0871637	0.910317	0.612764	0.0145696	0.47673	0.292692	-0.913036	0.000174479	-0.387435	0.126982	-0.52347	0.0272254
ATP6V1B2	-0.00788914	0.910529	-0.0319248	0.860262	-0.0315016	0.66936	-0.0518732	0.716561	-0.039814	0.54403	-0.0393907	0.578567	-0.0597623	0.344049
ATP6V1C1	-0.342093	6.24254e-08	0.0701505	0.566798	0.278678	1.10504e-05	-0.0805786	0.524327	-0.271943	8.19048e-06	-0.0634148	0.323303	-0.422672	1.71172e-10
ATP6V1C2	-0.576367	0.000866173	0.243555	0.471426	0.692982	0.00015185	0.296321	0.393766	-0.332812	0.0542234	0.116615	0.553421	-0.280047	0.103214
ATP6V1D	-0.229542	4.84731e-11	-0.112747	0.00678885	-0.120484	0.000187175	-0.00120832	0.988193	-0.342289	2.66753e-17	-0.350026	1.84725e-17	-0.230751	3.28686e-11
ATP6V1E1	0.0496129	0.395432	0.00155163	0.99266	0.0705117	0.255458	0.0626305	0.620293	0.0511645	0.382192	0.120125	0.041255	0.112243	0.0449422
ATP6V1E2	-0.752896	4.01855e-08	0.175391	0.483704	0.496781	0.000222727	0.069731	0.82316	-0.577504	1.12385e-05	-0.256115	0.0538186	-0.683165	3.42556e-07
ATP6V1F	-0.282859	0.00178301	0.041591	0.880782	0.204764	0.031472	0.116515	0.555155	-0.241268	0.00765175	-0.0780949	0.438209	-0.166344	0.0643073
ATP6V1FNB	-0.579512	0.00147524	0.14545	0.748985	0.358355	0.0633052	-0.0738649	0.876082	-0.434062	0.0170149	-0.221156	0.261949	-0.653377	0.000347861
ATP6V1G1	0.276789	5.40298e-08	0.0798492	0.349985	0.0118588	0.842684	0.0330206	0.767898	0.356638	5.26065e-11	0.288647	3.15665e-08	0.309809	2.50506e-09
ATP6V1G2	-0.034007	0.891691	0.12806	0.838288	0.114706	0.662689	0.165667	0.751395	0.0940527	0.694468	0.080699	0.761949	0.13166	0.570326
ATP6V1H	-0.104668	0.00236452	0.00827444	0.945606	0.0791104	0.0288876	0.0941588	0.0887854	-0.0963937	0.00515858	-0.0255577	0.512178	-0.0105094	0.780169
ATP7A	0.0795889	0.608648	0.0173517	0.97496	0.249376	0.112423	-0.107138	0.757577	0.0969406	0.53251	0.328965	0.0311108	-0.027549	0.86494
ATP7B	0.512853	4.30786e-05	-0.0324584	0.93798	0.231542	0.0757711	-0.161319	0.545928	0.480394	0.000120062	0.744395	3.65548e-08	0.351533	0.00387833
ATP8A1	-0.0695671	0.683083	-0.0849735	0.851733	-0.00899282	0.966356	-0.109032	0.772164	-0.154541	0.34517	-0.0785599	0.672551	-0.178599	0.265216
ATP8A2	-0.594586	0.000974716	-0.160974	0.709036	0.158147	0.438234	-0.532517	0.0558831	-0.75556	4.11368e-05	-0.436439	0.0192111	-1.1271	8.05489e-09
ATP8B1	-0.134454	0.405647	0.0099365	0.985612	0.252086	0.133375	-0.221862	0.504411	-0.124517	0.446109	0.117632	0.505066	-0.356316	0.021149
ATP8B2	-0.454567	3.28364e-07	-0.0953633	0.593352	-0.114121	0.213155	-0.22867	0.0906933	-0.54993	3.20359e-09	-0.568688	1.9204e-09	-0.683237	3.308e-12
ATP8B3	-0.613076	7.17851e-05	0.110376	0.778552	0.418964	0.0082886	-0.330245	0.227716	-0.5027	0.000988987	-0.194112	0.234891	-0.943321	9.9288e-09
ATP8B4	-1.03356	4.00148e-06	0.200415	0.693204	0.420757	0.0657145	0.428106	0.294297	-0.833147	0.000144949	-0.612804	0.005927	-0.605456	0.00462728
ATP9A	-0.290384	0.00219173	-0.159799	0.352301	0.0655266	0.552509	-0.205538	0.231665	-0.450183	5.08605e-06	-0.224857	0.0223823	-0.495922	6.28841e-07
ATP9B	-0.49379	1.75656e-11	0.117713	0.284409	0.437859	2.55605e-09	0.004096	0.983005	-0.376077	4.16918e-08	-0.0559308	0.427449	-0.489694	1.8205e-11
ATPAF1	0.0215485	0.694391	0.0339866	0.800209	-0.00472912	0.945715	0.0812592	0.437359	0.055535	0.287182	0.0168193	0.786489	0.102808	0.0410906
ATPAF2	-0.043881	0.568756	-0.0586274	0.74746	0.0597692	0.473278	0.0261684	0.89661	-0.102508	0.166573	0.0158883	0.860926	-0.0177126	0.824837
ATR	-0.417516	9.79245e-06	0.0685108	0.769998	0.201388	0.0364318	-0.0684647	0.752249	-0.349006	0.000172205	-0.216129	0.0227838	-0.485981	4.40615e-07
ATRAID	-0.0735267	0.35425	0.0943348	0.554863	0.0367352	0.690461	0.110646	0.499518	0.0208081	0.807928	-0.0367915	0.685093	0.037119	0.651539
ATRIP	0.188941	0.502981	-0.0621382	0.948724	-0.0352231	0.92178	-0.0582657	0.939644	0.126803	0.66217	0.153718	0.621641	0.130676	0.649233
ATRN	-0.455247	4.32648e-08	0.0863427	0.602071	0.435303	3.43372e-07	-0.0218287	0.920295	-0.368904	4.31375e-06	-0.0199433	0.832922	-0.477075	1.13907e-08
ATRNL1	-0.486794	0.0683487	0.0713652	0.937159	0.451218	0.115202	-0.0795508	0.916059	-0.415429	0.124543	-0.0355768	0.915423	-0.566345	0.0324086
ATRX	-0.142716	0.0539336	-0.0307554	0.894041	0.160563	0.0398963	0.0153617	0.941781	-0.173471	0.0192525	0.017847	0.845493	-0.127354	0.0845724
ATXN1	-0.341241	0.00166519	-0.187204	0.334972	-0.208614	0.070011	-0.206843	0.324846	-0.528445	3.06967e-06	-0.549855	2.11938e-06	-0.548084	1.28338e-06
ATXN10	-0.196564	1.54795e-07	0.00598953	0.962676	0.134873	0.000281629	-0.0125143	0.896873	-0.190574	3.30555e-07	-0.0616903	0.0953063	-0.209078	3.07077e-08
ATXN1L	0.618533	7.8553e-10	-0.16265	0.303542	-0.446573	4.80127e-06	-0.0507783	0.818064	0.455882	1.43628e-06	0.171959	0.0684402	0.567754	6.96277e-09
ATXN2	-0.392823	2.77448e-09	0.0429022	0.783084	0.134296	0.0328128	-0.0331438	0.822069	-0.349921	5.82126e-08	-0.258528	3.92275e-05	-0.425967	2.27096e-10
ATXN2-AS	-0.376488	0.0372863	-0.0304031	0.962749	0.281675	0.150443	0.448721	0.142039	-0.406891	0.0249113	-0.0948125	0.65488	0.072233	0.710628
ATXN2L	0.394568	7.68164e-12	-0.0480882	0.67236	-0.196043	0.000180569	0.0021327	0.987418	0.346479	4.56008e-10	0.198524	0.000118859	0.3967	5.054e-12
ATXN3	0.051919	0.48182	-1.93701e-05	0.999879	0.182245	0.0137591	-0.05313	0.750054	0.0518996	0.484646	0.234164	0.00135141	-0.00121099	0.987838
ATXN7.1	0.994381	9.46098e-14	-0.144435	0.512656	-0.479823	4.23647e-05	-0.0366816	0.904636	0.849946	2.16401e-11	0.514558	9.26911e-06	0.957699	2.84015e-13
ATXN7L1	0.509474	1.2772e-06	-0.0386531	0.903444	-0.399686	0.000172085	-0.0488453	0.844176	0.470821	6.25646e-06	0.109788	0.316027	0.460629	8.07009e-06
ATXN7L2	0.418725	2.85434e-05	-0.107098	0.614617	-0.220353	0.0318967	-0.071205	0.757577	0.311626	0.00149777	0.198371	0.0517712	0.34752	0.000386212
ATXN7L3	0.440189	6.93327e-14	-0.0416356	0.720475	-0.145787	0.00377057	-0.0124707	0.927541	0.398554	2.42752e-12	0.294403	2.92183e-08	0.427719	1.51646e-13
ATXN7L3B	-0.110537	0.0213717	-0.0579431	0.564582	-0.11783	0.0198621	-0.109942	0.196336	-0.16848	0.000547097	-0.228367	8.06709e-06	-0.220479	8.87172e-06
AUH	-0.145494	0.0916469	0.0111392	0.973797	0.30329	0.000816664	0.0170213	0.944415	-0.134355	0.123026	0.157796	0.0811844	-0.128473	0.135554
AUNIP	-0.283224	0.0770016	0.110628	0.792775	0.470853	0.00496128	0.302009	0.331923	-0.172596	0.294774	0.187628	0.280699	0.0187848	0.915832
AUP1	0.214666	0.00281678	-0.00836627	0.97496	0.102063	0.192176	0.0938128	0.549482	0.206299	0.00419258	0.316729	2.93046e-05	0.308479	2.64212e-05
AURKAIP1	-0.044019	0.695687	0.0579893	0.845152	0.0718338	0.552931	0.169533	0.428678	0.0139703	0.907091	0.0278149	0.827893	0.125514	0.232556
AURKB	-0.260048	0.329064	0.144341	0.845267	0.155207	0.612281	0.215055	0.720275	-0.115707	0.680329	-0.104841	0.73562	-0.0449929	0.875774
AURKC	0.184732	0.0773841	0.103548	0.663617	-0.154315	0.173336	0.24005	0.191428	0.28828	0.00585133	0.0304168	0.812812	0.424781	6.23013e-05
AUTS2	0.0888343	0.323431	-0.108637	0.547591	-0.287874	0.00175856	-0.0676858	0.740007	-0.0198024	0.840097	-0.19904	0.0291463	0.0211485	0.826007
AVEN	0.334044	0.00086069	0.0563815	0.84231	-0.194101	0.066802	0.210872	0.249703	0.390425	0.000122323	0.139943	0.190625	0.544916	2.42993e-07
AVIL	0.589656	4.4203e-06	0.106415	0.722803	-0.394758	0.00231293	0.213743	0.39027	0.696071	1.45073e-07	0.194898	0.137921	0.803399	3.13678e-09
AVL9	0.167297	0.0704151	0.00441	0.988755	0.00366347	0.977864	-0.0716457	0.73841	0.171707	0.0646148	0.17096	0.0785011	0.0956512	0.309873
AVPI1	0.965864	2.09965e-13	-0.127286	0.575815	-0.141773	0.234159	0.0935773	0.712734	0.838579	2.67286e-11	0.824091	6.90999e-11	1.05944	5.30468e-15
AVPR1A	-0.0961238	0.599066	0.118209	0.794958	-0.0453589	0.835125	-0.143419	0.719248	0.0220847	0.911564	-0.141483	0.464499	-0.239543	0.167039
AVPR2	-0.0755193	0.800685	0.0222143	0.981567	-0.163747	0.606791	-0.0628123	0.935449	-0.053305	0.862061	-0.239267	0.426087	-0.138332	0.629884
AWAT2	0.284314	0.262207	0.238311	0.681336	0.0758907	0.806669	-0.378954	0.465815	0.522625	0.0358901	0.360204	0.175364	-0.09464	0.723886
AXDND1	-0.570602	0.00271475	0.0732022	0.903921	-0.500805	0.0120705	-0.0365783	0.946731	-0.4974	0.00902135	-1.07141	2.32952e-07	-0.607181	0.00138681
AXIN1	0.119544	0.0251366	0.0046664	0.980911	-0.067621	0.250736	-0.00495897	0.975305	0.124211	0.0205069	0.0519233	0.380041	0.114585	0.0310101
AXIN2	-0.30234	0.00268396	-0.0660709	0.806332	0.651071	1.45829e-08	-0.102988	0.652151	-0.368411	0.000310042	0.348731	0.000841955	-0.405328	7.28481e-05
AXL	0.699654	2.74386e-11	-0.344799	0.00545736	-0.274006	0.00407237	0.0261238	0.919399	0.354855	0.000130063	0.425648	1.02126e-05	0.725778	6.69411e-12
AZGP1	0.18014	0.396228	0.673693	0.019794	0.239219	0.291019	0.507953	0.141682	0.853832	4.86812e-05	0.419359	0.0504094	0.688093	0.000791505
AZI2	0.789733	2.88317e-14	-0.151486	0.306472	-0.597221	1.20978e-09	0.0381507	0.856965	0.638247	4.48618e-11	0.192512	0.0279173	0.827884	3.65148e-15
AZIN1	-0.388947	0.000580311	-0.0804575	0.783084	-0.241834	0.0410369	-0.111024	0.662541	-0.469405	4.53309e-05	-0.630781	2.3805e-07	-0.499971	1.38956e-05
AZIN1-AS1	-1.13155	8.40626e-12	0.129261	0.700657	0.429366	0.0038713	0.175978	0.572296	-1.00229	3.84581e-10	-0.702187	3.4792e-06	-0.955575	1.18509e-09
AZIN2	0.197068	0.200473	-0.269337	0.31768	-0.769244	3.30975e-06	-0.144568	0.67711	-0.0722686	0.658795	-0.572176	0.000297648	0.0525003	0.74971
AZU1	0.0874225	0.722269	0.082234	0.910523	-0.281854	0.257483	0.189333	0.717102	0.169656	0.475767	-0.194432	0.440654	0.276756	0.225609
B2M	1.86033	1.2102e-24	-0.0999137	0.716906	-0.731711	1.85645e-08	-0.0273351	0.933123	1.76042	2.1388e-23	1.12862	7.14872e-15	1.83299	2.10168e-24
B3GALNT1	1.09168	1.32028e-14	-0.0823013	0.781461	-0.626032	6.26544e-07	0.107664	0.680627	1.00938	2.4756e-13	0.465647	9.35739e-05	1.19934	2.52516e-16
B3GALNT2	0.140033	0.372664	0.0586564	0.903444	-0.0381381	0.842743	-0.04528	0.916083	0.198689	0.199771	0.101895	0.557772	0.0947529	0.552701
B3GALT2	-0.000973382	0.997628	0.15827	0.829591	-0.064884	0.846345	0.169474	0.788454	0.157297	0.575525	-0.0658574	0.839339	0.168501	0.542086
B3GALT4	0.151275	0.200186	-0.0210917	0.961589	-0.0558545	0.688696	0.106705	0.691469	0.130183	0.277127	0.09542	0.46473	0.257979	0.0254262
B3GALT5	-0.067143	0.807997	0.0520395	0.953673	0.00741562	0.983377	-0.395411	0.442807	-0.0151035	0.957832	-0.0597273	0.845951	-0.462554	0.0614638
B3GALT5-AS1	0.189073	0.466651	-0.180206	0.780139	0.118587	0.690531	-0.283588	0.608252	0.00886682	0.975262	0.307661	0.252819	-0.0945147	0.724195
B3GALT6	-0.169048	0.015013	0.0199405	0.93023	0.0630153	0.425941	0.0598605	0.712883	-0.149108	0.0328929	-0.106033	0.154059	-0.109188	0.117333
B3GAT1	0.230114	0.386662	0.19593	0.766057	0.136747	0.655289	0.202588	0.733026	0.426044	0.100392	0.366861	0.18212	0.432702	0.0910637
B3GAT2	-0.373894	0.0988623	0.165924	0.776179	0.122075	0.649864	0.208647	0.689353	-0.20797	0.374942	-0.251819	0.306821	-0.165246	0.480798
B3GAT3	-0.209447	0.0193208	-0.0326837	0.910481	0.181707	0.0562287	-0.0221344	0.931366	-0.242131	0.00710184	-0.0277399	0.801512	-0.231582	0.00934132
B3GLCT	-0.637797	8.17699e-13	-0.153662	0.215778	-0.0640824	0.450669	-0.151492	0.281162	-0.791459	2.89406e-16	-0.70188	4.21767e-14	-0.78929	2.1064e-16
B3GNT10	0.0713943	0.617364	-0.04218	0.924276	-0.132634	0.380045	-0.166499	0.572732	0.0292143	0.846992	-0.06124	0.699456	-0.0951046	0.496105
B3GNT2	0.528968	0.000128857	-0.0804787	0.833442	-0.177892	0.232699	-0.0875919	0.787726	0.448489	0.00106521	0.351076	0.0126843	0.441376	0.00114988
B3GNT3	0.995543	2.56126e-26	0.16449	0.0466026	-0.0976404	0.108068	0.289335	0.00012721	1.16003	1.10663e-29	0.897903	1.60847e-23	1.28488	3.79131e-32
B3GNT4	-0.242028	0.145164	0.120856	0.776869	0.192378	0.290796	0.362519	0.222301	-0.121173	0.484981	-0.0496504	0.806503	0.12049	0.481305
B3GNT5	-0.360362	0.0326428	-0.0843953	0.866939	-0.376523	0.0346914	-0.368328	0.228597	-0.444757	0.00862082	-0.736885	3.54952e-05	-0.72869	2.48111e-05
B3GNT6	1.47573	1.35091e-06	0.246266	0.729809	0.584737	0.05786	-0.341948	0.59531	1.722	4.54583e-08	2.06047	5.55095e-10	1.13378	0.000116752
B3GNT7	0.802659	2.14414e-12	-0.328812	0.0142346	-0.736682	1.64703e-10	-0.0885762	0.691103	0.473846	2.73929e-06	0.0659767	0.549825	0.714082	7.48867e-11
B3GNT8	0.851276	1.49606e-11	-0.00264128	0.992865	-0.304335	0.00750517	0.154043	0.506512	0.848635	1.78623e-11	0.546941	2.49081e-06	1.00532	3.74442e-14
B3GNT9	-0.0591698	0.514297	0.0462046	0.853572	0.0757788	0.441031	-0.0445266	0.834575	-0.0129651	0.896128	0.016609	0.87854	-0.103696	0.235612
B3GNTL1	-0.619405	5.64277e-05	0.0809004	0.851733	0.453242	0.00407534	0.221275	0.491167	-0.538504	0.000411481	-0.166162	0.312152	-0.39813	0.007675
B4GALNT2	0.174918	0.36697	-0.500542	0.0732145	-0.696501	0.000443051	-0.608761	0.0297724	-0.325623	0.0850845	-0.521583	0.0072241	-0.433842	0.0196576
B4GALNT3	-0.143451	0.183216	0.00882397	0.981433	-0.0156264	0.912067	0.131997	0.572732	-0.134627	0.21578	-0.159077	0.161725	-0.0114544	0.92328
B4GALNT4	-0.23311	0.13596	0.121373	0.757218	0.419162	0.00999566	0.269589	0.387506	-0.111737	0.494727	0.186052	0.269402	0.0364791	0.830811
B4GALT1	0.471633	1.15861e-08	-0.390733	7.87276e-05	-0.587185	1.01602e-10	-0.27414	0.0120859	0.0808999	0.299584	-0.115551	0.152068	0.197494	0.00849883
B4GALT1-AS1	-0.325455	0.0211694	0.0245733	0.962676	0.00818176	0.965996	0.0928698	0.784091	-0.300882	0.0341018	-0.317273	0.0317243	-0.232585	0.100104
B4GALT2	0.10098	0.166744	0.0654589	0.704512	0.17485	0.0212975	0.0887375	0.578303	0.166439	0.0214477	0.27583	0.000253139	0.189717	0.00816087
B4GALT3	0.153898	0.0109856	0.00375614	0.985612	0.0748375	0.263154	0.0255886	0.870651	0.157654	0.00947834	0.228735	0.000300542	0.179486	0.00295775
B4GALT4	0.533203	4.79069e-15	0.0362794	0.800209	-0.0260851	0.687255	0.144901	0.100079	0.569483	4.07335e-16	0.507118	4.97939e-14	0.678104	1.81723e-19
B4GALT5	0.669902	2.29241e-10	-0.0442706	0.876286	-0.346762	0.000436504	-0.0142411	0.958033	0.625632	1.7328e-09	0.32314	0.000840757	0.655661	3.53706e-10
B4GALT6	0.274797	0.101393	-0.0673764	0.898686	-0.149847	0.429432	-0.223934	0.537316	0.20742	0.224589	0.124949	0.509185	0.0508628	0.780802
B4GALT7	-0.0851339	0.218023	0.0346619	0.862939	0.0515298	0.51082	0.0842428	0.573205	-0.050472	0.480754	-0.0336042	0.674456	-0.000891135	0.990537
B4GAT1	-0.271476	0.0150606	-0.00225373	0.994629	0.131449	0.288637	0.00093758	0.997412	-0.27373	0.0146539	-0.140027	0.248147	-0.270538	0.014872
B9D1	-0.946966	9.68667e-08	0.00316309	0.995019	-0.124761	0.513288	-0.0622286	0.889454	-0.943803	1.1233e-07	-1.07173	7.05221e-09	-1.00919	1.76927e-08
B9D2	-0.682585	2.85196e-07	0.0242999	0.959203	-0.0843229	0.562797	-0.0544067	0.864122	-0.658285	6.6692e-07	-0.766908	2.93935e-08	-0.736992	4.15589e-08
BAALC	-0.777869	5.92547e-05	-0.164487	0.720475	0.351257	0.0823428	-0.207887	0.625036	-0.942356	2.16145e-06	-0.426612	0.0309307	-0.985756	7.34891e-07
BAALC-AS1	-0.627421	7.33184e-09	-0.0699402	0.787619	-0.000246256	0.998457	-0.247002	0.137478	-0.697361	4.1694e-10	-0.627667	1.20563e-08	-0.874422	2.01603e-13
BAALC-AS2	-0.727989	0.00276888	0.0946474	0.903444	0.0849374	0.777031	-0.291432	0.588344	-0.633341	0.00930137	-0.643051	0.0106996	-1.01942	3.90666e-05
BABAM1	-0.103386	0.253349	-0.0115884	0.97366	0.180206	0.0552063	0.033484	0.889018	-0.114975	0.20406	0.0768198	0.437346	-0.0699023	0.446859
BABAM2	-0.202715	0.00457416	0.193617	0.0691969	0.303118	7.40571e-05	0.202441	0.0750757	-0.00909831	0.912176	0.100403	0.191279	-0.000274197	0.997383
BACE1	-0.310864	1.65933e-05	-0.0503106	0.783084	0.299679	6.31049e-05	-0.133924	0.324255	-0.361175	1.0329e-06	-0.0111855	0.898991	-0.444788	6.10645e-09
BACE1-AS	-0.00157286	0.990342	0.0493517	0.881335	0.22653	0.0460871	-0.103479	0.673683	0.0477788	0.681513	0.224957	0.045152	-0.105052	0.339062
BACE2	0.513733	1.67969e-14	-0.0918315	0.345898	-0.148231	0.00871952	-0.0341849	0.791862	0.421901	1.70374e-11	0.365502	1.94605e-09	0.479548	1.60356e-13
BACH1	1.0155	5.55594e-07	-0.0333185	0.962676	-0.589076	0.00341086	-0.016184	0.978059	0.982186	1.18874e-06	0.426429	0.0330575	0.999321	7.03925e-07
BACH1-IT1	-0.302447	0.160234	0.103963	0.871766	0.0850679	0.744789	0.243476	0.608252	-0.198484	0.370064	-0.217379	0.35394	-0.0589709	0.801592
BACH2	0.595256	0.000393779	-0.434373	0.0809309	-0.746082	2.9176e-05	-0.328536	0.300246	0.160884	0.350206	-0.150826	0.414702	0.266721	0.108423
BAD	-0.424403	0.000113721	-0.0669053	0.822892	0.0554274	0.667603	0.0568852	0.831069	-0.491308	1.15536e-05	-0.368976	0.000995518	-0.367518	0.000685562
BAG1	0.816562	6.70057e-10	-0.15978	0.497048	-0.38832	0.00173859	0.164463	0.515843	0.656782	1.94829e-07	0.428242	0.000485265	0.981025	1.69057e-12
BAG2	-0.881464	1.3756e-08	0.235176	0.367877	0.626784	3.96664e-05	0.0442509	0.91202	-0.646289	1.17287e-05	-0.25468	0.0895564	-0.837214	4.3216e-08
BAG3	0.0632595	0.076786	-0.128638	0.00875813	-0.104065	0.0054011	-0.0557709	0.454699	-0.0653787	0.0687397	-0.0408056	0.294264	0.00748857	0.849263
BAG4	0.173936	0.0914692	-0.00761348	0.9835	-0.0804066	0.495236	-0.0833818	0.725522	0.166322	0.109437	0.093529	0.412799	0.0905538	0.390951
BAG5	-0.0556273	0.31377	-0.0238588	0.886043	-0.0785798	0.178748	-0.0512733	0.67711	-0.0794861	0.145779	-0.134207	0.0161752	-0.106901	0.045386
BAG6	-0.16515	3.88198e-06	0.0309531	0.706193	0.0896152	0.0128559	0.00627304	0.949125	-0.134197	0.000126503	-0.0755353	0.0349744	-0.158877	7.25048e-06
BAHCC1	0.468361	5.1638e-06	-0.231861	0.13538	-0.385301	0.000237504	-0.0386906	0.882322	0.236499	0.0168538	0.08306	0.452094	0.42967	2.14638e-05
BAHD1	0.0216478	0.657049	-0.0421227	0.696241	0.0258953	0.631949	-0.115183	0.130188	-0.0204748	0.677839	0.0475431	0.34135	-0.093535	0.0384763
BAIAP2	-0.189508	0.00268833	-0.131352	0.209952	-0.228168	0.000613236	0.0740064	0.595613	-0.320861	1.3796e-06	-0.417677	3.8474e-09	-0.115502	0.0660083
BAIAP2-DT	-0.748125	5.59594e-11	-0.0609282	0.825447	0.271701	0.00919731	-0.149554	0.476303	-0.809053	4.8389e-12	-0.476424	6.63277e-06	-0.897679	9.57918e-14
BAIAP2L1	0.048268	0.145512	-0.140576	0.00130199	-0.220404	5.77513e-09	-0.12592	0.00665744	-0.0923085	0.00508178	-0.172136	1.14196e-06	-0.0776515	0.0171899
BAIAP3	-0.994783	1.96113e-10	-0.0790932	0.840613	-0.508278	0.000481397	-0.205141	0.482484	-1.07388	1.96328e-11	-1.50306	1.61858e-16	-1.19992	3.43697e-13
BAK1	1.61577	1.2516e-22	-0.130399	0.567306	-0.854341	8.39069e-11	0.184333	0.406546	1.48538	7.69555e-21	0.761434	9.032e-10	1.80011	5.90444e-25
BAMBI	0.0122566	0.933282	-0.366201	0.0523832	-0.419309	0.00191296	-0.227612	0.376351	-0.353945	0.0059958	-0.407052	0.00223281	-0.215355	0.0932385
BANF1	-0.336019	3.24632e-05	0.0970707	0.552295	0.149377	0.0751095	0.100439	0.562222	-0.238949	0.00255302	-0.186643	0.0227896	-0.23558	0.00267118
BANF1P3	-0.0519897	0.781777	0.115141	0.798187	0.232576	0.212392	0.105127	0.798516	0.0631509	0.734554	0.180586	0.334038	0.0531369	0.775393
BANK1	0.828729	3.16624e-11	0.127332	0.572901	-0.278318	0.0142657	0.208736	0.318901	0.95606	2.87272e-13	0.55041	2.06514e-06	1.03746	1.02613e-14
BANP	-0.105742	0.0823846	-0.050935	0.733283	0.0216744	0.771789	-0.0118666	0.945357	-0.156677	0.00996455	-0.084068	0.197446	-0.117609	0.0513481
BAP1	0.194367	6.6382e-06	0.00487189	0.97496	0.0333074	0.484469	0.0690845	0.415655	0.199239	4.38846e-06	0.227674	4.42397e-07	0.263452	6.49865e-09
BARD1	0.49572	0.00140585	-0.142685	0.697859	-0.197592	0.245309	-0.114482	0.75485	0.353036	0.0226709	0.298128	0.0664737	0.381238	0.0129558
BARX2	-0.196122	0.0390847	-0.0599415	0.818102	-0.476829	4.18262e-06	0.0155888	0.954195	-0.256064	0.00726519	-0.672951	6.01737e-10	-0.180534	0.0566246
BASP1	-0.778346	2.41844e-13	-0.0890875	0.654817	-0.085965	0.385342	-0.114181	0.551152	-0.867433	4.95774e-15	-0.864311	8.47095e-15	-0.892527	1.11913e-15
BASP1-AS1	-1.09946	1.55131e-05	0.605847	0.110034	0.199699	0.47986	0.327866	0.541743	-0.493611	0.0463298	-0.899759	0.000458409	-0.771592	0.00171377
BATF	0.69354	2.56727e-05	0.0576771	0.91156	-0.214742	0.221526	0.00940845	0.984497	0.751217	6.7007e-06	0.478797	0.00391244	0.702948	1.86517e-05
BATF2	4.76828	5.31751e-32	-0.301937	0.465278	-1.74401	1.55003e-11	0.269245	0.561391	4.46634	2.07785e-30	3.02427	1.79674e-21	5.03752	2.58145e-33
BATF3	1.11943	1.49111e-05	-0.057827	0.948958	-1.0454	9.26039e-05	0.231976	0.689249	1.06161	3.77929e-05	0.0740311	0.81032	1.35141	3.35072e-07
BAX	-0.422933	2.85231e-05	-0.0155554	0.966292	0.199389	0.0559602	-0.0593074	0.804649	-0.438489	1.64505e-05	-0.223545	0.0293065	-0.482241	2.47047e-06
BAZ1A	0.698127	9.50268e-19	-0.0990446	0.337023	-0.43397	2.25973e-10	0.0475612	0.720797	0.599083	6.09037e-16	0.264157	1.42331e-05	0.745688	4.00006e-20
BAZ1B	0.372173	4.08439e-12	-0.086565	0.269525	-0.227379	4.53602e-06	-0.01462	0.909346	0.285608	1.11187e-08	0.144794	0.00217446	0.357553	1.19438e-11
BAZ2A	0.741271	2.53677e-13	-0.151227	0.305723	-0.307732	0.000510367	-0.016601	0.944415	0.590044	4.3682e-10	0.433539	1.46606e-06	0.72467	4.4301e-13
BAZ2B	0.331902	2.72106e-06	-0.0281787	0.894041	-0.0346484	0.668634	-0.0781921	0.602314	0.303723	1.47448e-05	0.297253	3.15722e-05	0.25371	0.000204066
BBC3	1.1844	4.73175e-12	-0.551597	0.00554879	-1.22681	9.26645e-12	-0.228959	0.451824	0.632804	2.54303e-05	-0.0424076	0.813095	0.955443	2.62167e-09
BBIP1	-0.502786	4.12296e-06	-0.0160973	0.967519	0.0892871	0.45509	-0.0569616	0.824445	-0.518883	2.35189e-06	-0.413499	0.000160535	-0.559747	4.15754e-07
BBOF1	-1.02689	1.17568e-09	-0.0217305	0.970008	-0.234238	0.152193	-0.183663	0.58221	-1.04862	6.867e-10	-1.26113	3.17456e-12	-1.21055	6.13658e-12
BBOX1	-1.23849	2.63663e-14	0.196772	0.435928	0.558616	7.03939e-05	0.0163475	0.9665	-1.04172	1.16105e-11	-0.679877	1.48068e-06	-1.22215	3.27041e-14
BBOX1-AS1	-0.0111526	0.946921	-0.126398	0.721642	-0.270448	0.082954	-0.219808	0.476503	-0.137551	0.364656	-0.281601	0.0666378	-0.230961	0.114093
BBS1	-0.683113	4.55682e-07	0.11492	0.70795	0.178061	0.201677	0.0802589	0.793663	-0.568193	1.71091e-05	-0.505051	0.000156897	-0.602854	5.1195e-06
BBS10	-0.201712	0.177387	0.0381117	0.94032	0.00524392	0.980297	-0.167543	0.612159	-0.163601	0.282334	-0.196468	0.217138	-0.369256	0.011781
BBS12	-0.62076	1.62291e-07	-0.0829864	0.770623	-0.266459	0.0222575	-0.0971394	0.706583	-0.703746	7.93786e-09	-0.887219	1.26014e-11	-0.717899	3.66567e-09
BBS2	-0.543279	4.97183e-10	0.0674099	0.720475	0.0814484	0.349108	-0.0408416	0.831389	-0.47587	1.94726e-08	-0.461831	6.39826e-08	-0.584121	4.54946e-11
BBS4	-0.614486	4.39993e-10	-0.02194	0.942906	-0.175317	0.0588612	-0.126067	0.499392	-0.636426	1.66657e-10	-0.789803	1.95883e-13	-0.740553	9.29816e-13
BBS5	-0.56854	1.0181e-06	0.0241941	0.951995	-0.35828	0.00202769	-0.0537549	0.844722	-0.544346	2.57861e-06	-0.92682	2.56108e-12	-0.622295	1.24106e-07
BBS7	-0.464656	2.38589e-08	-0.0179594	0.947198	-0.106681	0.202198	-0.0775404	0.655771	-0.482615	9.72309e-09	-0.571336	1.21365e-10	-0.542196	2.96558e-10
BBS9	-1.11464	7.49403e-17	-0.0658312	0.811071	-0.0655132	0.5828	-0.111225	0.62634	-1.18047	8.36754e-18	-1.18015	1.49785e-17	-1.22586	1.03811e-18
BBX	0.464328	5.76039e-10	-0.144689	0.18325	-0.258911	0.00025247	-0.0108749	0.954533	0.319638	4.4098e-06	0.205416	0.00295029	0.453453	9.51865e-10
BCAM	0.192413	0.0465155	0.0316138	0.921479	0.0776694	0.483445	0.155508	0.435498	0.224027	0.0207202	0.270082	0.00698965	0.347921	0.00034644
BCAP29	0.964795	2.9771e-15	0.0590545	0.825793	-0.297748	0.00333509	0.0423179	0.863307	1.02385	3.21606e-16	0.667047	1.2075e-09	1.00711	4.09232e-16
BCAP31	0.0889132	0.157251	-0.0396283	0.815057	0.173712	0.00777266	0.079458	0.561338	0.0492849	0.450102	0.262625	5.86261e-05	0.168371	0.00642959
BCAR1	0.493684	8.78738e-13	-0.156651	0.0681966	-0.367189	2.30358e-08	0.0306547	0.82916	0.337033	6.61791e-08	0.126495	0.0359863	0.524339	8.01521e-14
BCAR3	0.404433	0.000111458	-0.396574	0.0045265	-0.651358	2.46951e-08	-0.0894205	0.708834	0.00785959	0.947151	-0.246925	0.0209324	0.315013	0.00210705
BCAS1	-0.420396	0.000903499	0.125269	0.662653	0.383956	0.00365421	-0.0708159	0.818445	-0.295127	0.019223	-0.0364401	0.814045	-0.491212	0.000116053
BCAS2P2	-0.977951	0.000108644	-0.181229	0.778344	-0.286401	0.29757	-0.49492	0.292692	-1.15918	7.13391e-06	-1.26435	2.01508e-06	-1.47287	3.53029e-08
BCAS3	-0.603583	1.88353e-10	-0.0188764	0.949739	-0.00332801	0.977807	-0.070191	0.716504	-0.622459	7.83656e-11	-0.606911	2.5659e-10	-0.673774	4.59734e-12
BCAS4	-0.870393	1.17763e-12	-0.0538998	0.856939	0.354773	0.00104846	-0.00657241	0.983415	-0.924293	1.53247e-13	-0.51562	2.7224e-06	-0.876966	7.0481e-13
BCAT1	-0.235479	0.164814	-0.0501833	0.927618	-0.692226	0.000107807	-0.125651	0.752459	-0.285663	0.09153	-0.927705	3.5294e-07	-0.36113	0.0300167
BCAT2	-1.28834	6.63817e-17	0.195958	0.361113	0.802706	3.47277e-09	0.0752616	0.789295	-1.09238	4.41507e-14	-0.485635	7.92037e-05	-1.21308	5.53714e-16
BCCIP	-0.153819	0.0293614	0.0949053	0.503922	0.319624	2.63721e-05	0.0432634	0.800364	-0.0589141	0.425754	0.165804	0.024397	-0.110556	0.118408
BCDIN3D	-0.12302	0.126344	0.00381404	0.988755	0.0336561	0.730442	-0.0468928	0.810151	-0.119206	0.141792	-0.0893644	0.305691	-0.169913	0.0321305
BCDIN3D-AS1	-0.873187	9.02187e-05	-0.05254	0.945606	0.0208923	0.944321	-0.148856	0.776548	-0.925727	3.86302e-05	-0.852295	0.000192176	-1.02204	6.15286e-06
BCKDHB	-0.316259	0.00101467	0.0913482	0.682904	0.370143	0.000265052	0.0755302	0.733154	-0.224911	0.0189246	0.0538837	0.627491	-0.240729	0.0112574
BCKDK	-0.08165	0.247078	0.00163636	0.993044	0.244284	0.000805566	0.100455	0.495951	-0.0800136	0.259968	0.162634	0.0237951	0.0188046	0.804417
BCL10	0.345592	1.22865e-06	0.0205479	0.92708	-0.158816	0.0259546	-0.0197756	0.918227	0.366139	3.81494e-07	0.186776	0.00777963	0.325816	3.57498e-06
BCL11A	-0.0715845	0.435284	-0.313967	0.00972827	-0.317987	0.000621255	-0.246293	0.0804482	-0.385551	2.19045e-05	-0.389571	2.7493e-05	-0.317877	0.000330215
BCL11B	0.0995011	0.521396	-0.0187699	0.974925	-0.399322	0.00999758	-0.229097	0.459513	0.0807311	0.610015	-0.299821	0.052561	-0.129595	0.393517
BCL2	0.193001	0.288021	0.109826	0.822867	0.156275	0.438715	0.0604315	0.902883	0.302826	0.0906327	0.349275	0.0604307	0.253432	0.154439
BCL2A1	1.91588	9.52581e-16	-0.131368	0.788063	-0.915829	5.97218e-06	0.0237119	0.965453	1.78451	1.58861e-14	1.00005	6.90689e-07	1.93959	4.32501e-16
BCL2L1	0.0235551	0.659436	-0.0801323	0.387023	-0.158281	0.00248977	0.050197	0.657071	-0.0565772	0.269747	-0.134726	0.00905332	0.073752	0.139763
BCL2L10	-0.913719	0.000300011	0.458239	0.294524	0.688972	0.00853828	0.639525	0.124021	-0.45548	0.07018	-0.224747	0.418789	-0.274194	0.280024
BCL2L11	0.127365	0.109565	-0.0305671	0.903444	0.112953	0.19005	-0.178982	0.202707	0.0967976	0.232328	0.240318	0.0033563	-0.0516173	0.533426
BCL2L12	-0.0590458	0.554914	0.0771883	0.743851	0.0806361	0.455616	0.190063	0.290094	0.0181425	0.866422	0.0215903	0.854104	0.131017	0.169296
BCL2L13	1.12531	1.03871e-22	-0.14546	0.262059	-0.646129	6.26259e-12	0.0956969	0.566244	0.979855	7.41836e-20	0.479186	1.33783e-08	1.22101	1.74192e-24
BCL2L14	2.84011	2.6093e-24	-0.234834	0.510128	-1.52287	4.72349e-12	0.125928	0.764674	2.60528	2.02598e-22	1.31724	1.2753e-10	2.96604	2.6117e-25
BCL2L15	1.83225	3.47369e-16	0.0106297	0.985612	-0.656676	0.000356976	-0.14769	0.714796	1.84288	3.09291e-16	1.17557	2.12217e-09	1.68456	6.80246e-15
BCL2L2	0.111776	0.000960575	-0.0158793	0.8778	-0.053558	0.140526	0.100856	0.0522275	0.0958965	0.00450151	0.0582177	0.101789	0.212631	7.08698e-09
BCL2L2-PABPN1	-0.00553734	0.979894	0.197372	0.618166	-0.137873	0.508566	0.139708	0.740844	0.191835	0.304258	-0.14341	0.481362	0.134171	0.475419
BCL3	0.893457	1.45127e-11	-0.169569	0.438351	-0.179891	0.14327	-0.0243643	0.940427	0.723887	7.44309e-09	0.713565	1.66444e-08	0.869092	2.78714e-11
BCL6	0.182575	0.0548773	0.0518384	0.849833	0.328358	0.00104098	-0.0536373	0.818064	0.234414	0.0137671	0.510934	6.60749e-07	0.128938	0.177667
BCL7A	-0.649241	1.19504e-09	-0.0512722	0.85289	0.0635766	0.568971	-0.152814	0.441351	-0.700513	1.39138e-10	-0.585664	3.11333e-08	-0.802055	1.31119e-12
BCL7B	0.224516	0.000141894	-0.0220075	0.906035	-0.156689	0.0101231	0.00449257	0.979965	0.202509	0.000566069	0.0678273	0.283375	0.229009	9.91631e-05
BCL7C	-0.337946	0.000242525	-0.0367456	0.898686	0.248477	0.00916939	0.121693	0.538035	-0.374692	5.76982e-05	-0.0894697	0.372443	-0.216253	0.0164322
BCL9	-0.495655	2.00601e-07	-0.0635135	0.786329	0.118217	0.227568	-0.199067	0.21457	-0.559169	1.14288e-08	-0.377438	5.81975e-05	-0.694722	1.58985e-11
BCL9L	0.59067	4.56582e-11	-0.174351	0.163514	-0.281319	0.000632929	-0.0708365	0.693779	0.416319	4.9713e-07	0.30935	0.000149218	0.519833	1.64805e-09
BCLAF1	-0.0821548	0.253937	-0.0551613	0.757693	0.000672272	0.994991	0.00718975	0.97252	-0.137316	0.0527965	-0.0814826	0.289224	-0.0749651	0.296555
BCLAF3	0.202647	0.0133749	-0.0613105	0.771553	-0.135564	0.125199	0.0504459	0.798997	0.141336	0.0882247	0.0670823	0.46692	0.253093	0.00199504
BCO1	0.477654	0.0107814	0.0668654	0.912552	-0.124415	0.570362	0.23866	0.563779	0.544519	0.00386105	0.353238	0.0738207	0.716313	0.000160347
BCO2	-1.33936	4.55259e-16	-0.022669	0.962166	0.0949064	0.520665	-0.103391	0.72754	-1.36203	2.66231e-16	-1.24446	1.29741e-14	-1.44276	1.61878e-17
BCOR	0.578768	1.28502e-06	-0.276753	0.116114	-0.376956	0.00162939	-0.197596	0.388173	0.302014	0.00802562	0.201812	0.0926966	0.381172	0.000814008
BCORL1	-0.243166	0.0161083	-0.0436265	0.889571	0.192506	0.0744411	-0.0760041	0.752311	-0.286793	0.00475516	-0.0506599	0.670763	-0.31917	0.00159678
BCRP2	-0.343818	0.163159	0.3423	0.47605	0.74821	0.00346387	0.168376	0.772164	-0.00151824	0.995566	0.404392	0.117833	-0.175442	0.489513
BCRP3	-0.0833367	0.748629	-0.151014	0.815391	-0.147599	0.59764	0.049346	0.941781	-0.234351	0.340912	-0.230936	0.379047	-0.0339907	0.897095
BCS1L	-0.187401	0.0216144	0.0546101	0.801255	0.303249	0.000455612	0.0253056	0.912519	-0.13279	0.108801	0.115848	0.186802	-0.162095	0.0461957
BCYRN1	-0.575501	0.0113704	-0.0147886	0.985424	-0.00542123	0.98642	0.323583	0.506512	-0.59029	0.00973349	-0.580922	0.0140218	-0.251918	0.276775
BDH1	-0.972312	1.30909e-13	-0.0383293	0.912552	0.0602632	0.63895	-0.151558	0.512455	-1.01064	3.51965e-14	-0.912048	1.97362e-12	-1.12387	4.09232e-16
BDH2	-0.757562	2.47569e-11	-0.0241926	0.944307	0.245681	0.0171119	-0.0158749	0.954906	-0.781755	9.76273e-12	-0.511881	1.24352e-06	-0.773437	1.0091e-11
BDKRB1	-0.553791	0.000849306	-0.219698	0.507438	0.656733	0.000178711	0.0409098	0.931085	-0.773489	6.61227e-06	0.102943	0.587609	-0.512881	0.0018162
BDKRB2	-0.785751	7.38539e-09	0.174117	0.475461	0.910821	4.89881e-10	-0.00452804	0.989537	-0.611635	2.46836e-06	0.12507	0.358927	-0.790279	5.4113e-09
BDNF	-1.16682	9.86901e-10	0.438151	0.0883441	1.16456	3.78056e-09	0.508417	0.0552499	-0.728664	3.38243e-05	-0.00225504	0.991778	-0.658398	0.000137493
BDNF-AS	-0.0168299	0.901301	0.135996	0.594469	-0.0929914	0.499819	0.0848779	0.764988	0.119166	0.336509	-0.109821	0.409432	0.068048	0.590807
BDP1	0.500667	0.00139627	-0.0758204	0.872348	-0.209332	0.220998	-0.163491	0.643129	0.424847	0.00660031	0.291336	0.0760851	0.337177	0.0294756
BEAN1	1.87287	1.23178e-11	-0.442557	0.283034	-1.91931	3.02301e-11	-0.262998	0.621787	1.43031	2.96179e-08	-0.0464429	0.876229	1.60987	1.00615e-09
BECN1	-0.127635	0.000938246	0.0504647	0.514688	0.0685158	0.0947743	0.00777705	0.94312	-0.0771704	0.0451341	-0.0591193	0.148565	-0.119858	0.00172989
BEGAIN	0.0533488	0.861969	0.0383038	0.970495	0.283942	0.350918	-0.101327	0.890685	0.0916526	0.758482	0.337291	0.25169	-0.0479781	0.873482
BEND3	-0.159628	0.110457	0.0923147	0.695077	0.205346	0.0510724	-0.151787	0.465619	-0.0673128	0.522961	0.0457189	0.697157	-0.311415	0.00169127
BEND5	-0.873201	4.28701e-06	-0.00485526	0.992764	0.676183	0.000454923	0.0685001	0.88966	-0.878057	4.02859e-06	-0.197018	0.323721	-0.804701	1.68173e-05
BEND6	-0.672629	0.00221706	-0.154679	0.788063	-0.0133928	0.963947	0.109856	0.839842	-0.827308	0.000211035	-0.686021	0.00254718	-0.562772	0.00977635
BEND7	-0.698094	2.18899e-11	-0.120213	0.506079	0.238023	0.0117608	-0.405949	0.000882773	-0.818307	1.06562e-13	-0.460071	1.91085e-06	-1.10404	4.86102e-19
BEST1	-0.205485	0.297759	0.154234	0.748504	0.619022	0.00219118	0.233975	0.581828	-0.0512517	0.810911	0.413537	0.0396775	0.0284896	0.893354
BEST3	0.722334	0.00168763	-0.517721	0.156967	-0.912586	0.000180569	-0.271314	0.59405	0.204613	0.391271	-0.190251	0.459	0.451021	0.0478843
BEST4	-0.577361	0.000838015	0.0380434	0.951476	-0.0498723	0.816842	-0.0587839	0.90228	-0.539318	0.00181337	-0.627234	0.000451843	-0.636145	0.000237836
BET1	0.621055	2.84814e-08	-0.0561731	0.849833	-0.291177	0.00711605	0.0251586	0.932055	0.564882	2.84365e-07	0.329878	0.00202659	0.646213	8.807e-09
BET1L	0.26395	3.57028e-07	0.0413347	0.730051	-0.00348421	0.958112	0.0309933	0.791859	0.305285	1.16975e-08	0.260466	7.77449e-07	0.294944	2.2658e-08
BEX2	-0.456869	5.85448e-05	0.154219	0.482696	0.473585	6.80788e-05	0.0513004	0.855218	-0.30265	0.00660574	0.0167156	0.904927	-0.405569	0.000290986
BEX3	-0.357103	0.000369411	-0.00320625	0.991474	0.423671	6.50079e-05	-0.0158985	0.9554	-0.360309	0.000342235	0.0665682	0.557737	-0.373001	0.000194019
BEX4	-0.346283	1.5408e-05	0.0277371	0.912242	0.385635	4.90547e-06	-0.116017	0.480785	-0.318546	6.24732e-05	0.0393524	0.666375	-0.4623	3.2626e-08
BFAR	0.186166	1.20373e-05	-0.0958728	0.13889	-0.131005	0.00244279	-0.0519565	0.566244	0.0902934	0.0285998	0.055161	0.213204	0.13421	0.00110613
BFSP1	-1.47017	3.76658e-14	0.21961	0.480012	0.726672	1.8513e-05	0.180483	0.606219	-1.25056	1.10338e-11	-0.743501	8.81156e-06	-1.28969	2.92124e-12
BHLHA15	0.387729	0.0644634	0.633945	0.0359667	0.192725	0.416958	0.145739	0.769723	1.02167	3.14159e-06	0.580454	0.00745373	0.533468	0.0102889
BHLHB9	-0.270302	0.00580311	-0.057405	0.837243	0.266862	0.00957076	-0.0645651	0.783977	-0.327707	0.000940044	-0.00344009	0.978485	-0.334867	0.000662886
BHLHE40	0.545491	1.76181e-09	-0.155165	0.267547	-0.363707	3.25044e-05	-0.110322	0.532005	0.390326	4.48048e-06	0.181784	0.0326465	0.435169	4.21162e-07
BHLHE40-AS1	-0.0157811	0.919328	-0.247838	0.304005	-0.383142	0.00764965	-0.317522	0.184793	-0.263619	0.055525	-0.398923	0.00488501	-0.333303	0.0141366
BHLHE41	-0.508769	0.0013169	-0.196323	0.545723	0.209878	0.224859	-0.399401	0.130188	-0.705092	1.56053e-05	-0.298891	0.0714518	-0.90817	7.39617e-08
BHMT	0.244836	0.303216	-0.079623	0.915241	-0.0948609	0.738175	-0.0535824	0.935449	0.165213	0.499693	0.149975	0.572873	0.191254	0.42404
BICC1	-0.822004	2.55383e-06	-0.432715	0.0851517	-0.937283	4.24963e-07	-0.555797	0.0253977	-1.25472	6.52113e-11	-1.75929	6.61028e-16	-1.3778	2.32164e-12
BICD1	-0.0597781	0.63809	-0.0194006	0.964604	-0.162428	0.212297	0.0110885	0.975211	-0.0791787	0.530647	-0.222206	0.0759503	-0.0486896	0.703773
BICD2	-0.675573	2.46627e-10	0.0115145	0.97496	0.194752	0.0509844	-0.00172467	0.994325	-0.664058	4.32338e-10	-0.48082	1.96436e-06	-0.677298	1.8576e-10
BICDL1	-0.0868337	0.576514	0.148131	0.657363	0.558938	0.000327823	0.0339434	0.935449	0.0612977	0.701353	0.472104	0.00193294	-0.0528904	0.739816
BICDL2	0.328139	7.09582e-06	0.0932763	0.510879	-0.0285453	0.741066	0.227819	0.030143	0.421415	3.5417e-08	0.299594	5.2268e-05	0.555958	9.63367e-12
BICRA	0.251193	1.24364e-05	-0.162338	0.0458661	-0.112875	0.0556749	-0.0531366	0.676363	0.088855	0.114914	0.138319	0.016676	0.198057	0.000397482
BICRA-AS1	-0.514001	0.0339342	-0.076455	0.924066	-0.57741	0.0237924	-0.0885146	0.894618	-0.590456	0.0151904	-1.09141	2.12049e-05	-0.602515	0.0124135
BICRAL	-0.0469097	0.665926	-0.0834342	0.737958	-0.00468651	0.973614	-0.127669	0.566244	-0.130344	0.20697	-0.0515962	0.664324	-0.174579	0.0835297
BID	0.0694683	0.375576	0.043939	0.838716	0.197804	0.0129109	0.123421	0.428678	0.113407	0.140645	0.267272	0.000689901	0.19289	0.0103383
BIK	-0.45009	0.000138486	-0.134989	0.580039	-0.0352891	0.807575	-0.145793	0.567839	-0.585078	1.68262e-06	-0.485379	6.90447e-05	-0.595882	9.92921e-07
BIN1	0.921192	7.21337e-13	-0.137913	0.529176	-0.333781	0.0030188	-0.0195214	0.949261	0.783278	1.4812e-10	0.587411	4.40344e-07	0.90167	1.17626e-12
BIN3	0.108108	0.065999	-0.0608009	0.646291	-0.135717	0.0281726	0.0553537	0.682794	0.0473067	0.44229	-0.0276096	0.69002	0.163461	0.00509588
BIRC2	0.678357	1.22906e-11	-0.203546	0.129893	-0.498326	2.02184e-07	-0.121745	0.508043	0.474811	2.33504e-07	0.18003	0.045152	0.556611	3.63534e-09
BIRC3	2.07938	1.4203e-17	-0.297925	0.376326	-1.01089	5.43768e-07	-0.0665114	0.894571	1.78146	7.47655e-15	1.06849	9.25857e-08	2.01287	3.9533e-17
BIRC6	0.216546	0.107402	-0.0591572	0.886297	0.0525641	0.748992	-0.113448	0.715318	0.157389	0.251806	0.26911	0.054848	0.103098	0.457263
BISPR	2.94982	3.09014e-34	-0.234253	0.242336	-1.02399	4.01658e-12	0.0258306	0.939079	2.71557	3.14344e-32	1.92584	4.88637e-24	2.97565	1.76961e-34
BIVM	-0.510095	3.11118e-07	0.00385114	0.989894	0.293447	0.00287175	-0.0741055	0.732887	-0.506244	3.89513e-07	-0.216648	0.0265718	-0.584201	1.02207e-08
BLACAT1	0.206961	0.0743968	-0.208636	0.306495	-0.00205456	0.989678	-0.118193	0.652862	-0.00167562	0.989836	0.204906	0.0934821	0.0887677	0.459598
BLCAP	-0.00616373	0.901905	-0.0367281	0.735409	-0.0443322	0.371318	-0.00949549	0.940294	-0.0428919	0.34843	-0.050496	0.294482	-0.0156592	0.743457
BLM	-0.881507	1.08509e-07	0.225399	0.453262	0.828316	1.11924e-06	0.0289833	0.948037	-0.656109	3.73824e-05	-0.0531915	0.778209	-0.852524	2.0762e-07
BLMH	-0.482716	9.83671e-10	0.128063	0.303225	0.327468	1.70279e-05	0.0556357	0.733946	-0.354653	1.78828e-06	-0.155248	0.0352502	-0.427081	2.21534e-08
BLNK	1.27522	6.63468e-17	-0.0336174	0.930065	-0.618997	1.21458e-06	0.0671392	0.813604	1.2416	2.2617e-16	0.656219	2.16829e-07	1.34236	5.7213e-18
BLOC1S1	-0.120713	0.352594	-0.0430833	0.915505	0.0269105	0.867939	0.159162	0.565935	-0.163796	0.202155	-0.093802	0.510966	0.0384493	0.780198
BLOC1S2	0.193542	0.00354313	-0.159858	0.121617	-0.381853	2.40875e-07	-0.0743729	0.617558	0.0336847	0.637087	-0.188311	0.0061467	0.119169	0.0716032
BLOC1S3	1.09085	7.52443e-17	-0.14766	0.44313	-0.708871	1.18389e-09	0.0909291	0.692221	0.943187	2.40489e-14	0.381976	0.000239807	1.18178	1.98079e-18
BLOC1S4	-0.0341145	0.642853	0.0550724	0.749342	0.0802068	0.292187	0.0161772	0.934592	0.0209579	0.782801	0.0460923	0.558548	-0.0179374	0.812649
BLOC1S5	-0.0151163	0.845657	0.0170977	0.944307	0.0478358	0.552694	-0.0100634	0.959579	0.00198138	0.979509	0.0327196	0.687928	-0.0251797	0.736677
BLOC1S6	-0.432982	4.19022e-05	0.129268	0.542841	0.249127	0.0215852	-0.0847934	0.722037	-0.303715	0.00336211	-0.183856	0.0911109	-0.517776	1.54143e-06
BLVRA	-0.196534	0.031157	-0.0296631	0.921931	0.162845	0.0957348	0.0804051	0.705066	-0.226197	0.0134473	-0.0336891	0.760394	-0.116129	0.208161
BLVRB	-0.137601	0.201731	0.205414	0.256354	0.520879	6.14054e-06	0.182914	0.393843	0.0678131	0.548261	0.383278	0.000522138	0.0453125	0.691165
BLZF1	2.1003	4.04035e-22	-0.264144	0.302736	-1.17037	3.59312e-11	0.05899	0.87664	1.83616	2.2162e-19	0.92993	1.02305e-08	2.15929	8.99356e-23
BMF	-0.152295	0.261179	-0.0398077	0.92755	0.366761	0.00843815	-0.36172	0.0914168	-0.192102	0.154796	0.214467	0.128606	-0.514015	0.000129259
BMI1	0.147318	0.353976	0.0207609	0.972177	-0.055921	0.767165	-0.186091	0.5841	0.168079	0.28938	0.091397	0.607761	-0.0387732	0.819016
BMP1	0.536417	1.08221e-06	-0.389394	0.00660102	-0.8517	2.43762e-11	-0.115568	0.622537	0.147023	0.167176	-0.315283	0.00357237	0.420849	7.3294e-05
BMP15	-0.679048	0.000452016	0.208597	0.619395	0.00599255	0.982638	0.2151	0.617244	-0.47045	0.0142539	-0.673055	0.000726171	-0.463947	0.0146839
BMP2	0.420612	0.0157595	-0.510451	0.0456628	-0.940913	9.84729e-07	-0.574171	0.0277148	-0.0898385	0.632447	-0.520301	0.00401629	-0.153559	0.392685
BMP2K	-0.246525	0.0617966	-0.00529769	0.990012	-0.114628	0.445489	-0.0262369	0.944236	-0.251823	0.0575495	-0.361153	0.00819465	-0.272762	0.0373029
BMP3	0.575298	0.000929886	0.149315	0.721748	0.0263722	0.908746	-0.373221	0.235509	0.724614	4.41999e-05	0.60167	0.000795746	0.202078	0.248224
BMP4	-0.0301928	0.808157	-0.153934	0.487543	-0.0919587	0.472809	-0.150467	0.536024	-0.184127	0.103668	-0.122151	0.318211	-0.18066	0.106244
BMP6	-0.389077	0.138324	0.539373	0.212326	-0.458379	0.100024	1.04012	0.00432374	0.150297	0.589375	-0.847456	0.0016822	0.651048	0.0117302
BMP7	-0.639774	3.67154e-05	0.110015	0.778822	0.616764	0.00012755	-0.177627	0.595553	-0.529759	0.000535636	-0.0230099	0.903707	-0.817401	3.16129e-07
BMP8B	0.0373072	0.811728	0.0920632	0.807507	-0.0785322	0.639249	0.136729	0.670464	0.12937	0.376227	-0.041225	0.811656	0.174036	0.220704
BMPER	-0.0605222	0.800625	-0.0456129	0.953471	0.0798379	0.76324	-0.0855274	0.880081	-0.106135	0.648617	0.0193157	0.945068	-0.14605	0.518232
BMPR1A	0.348161	0.00203475	-0.130252	0.582294	-0.271426	0.0218579	-0.146209	0.551604	0.217909	0.0542818	0.0767344	0.551415	0.201951	0.0719058
BMPR1B	-0.241431	0.0488472	0.066753	0.849833	0.527895	5.75276e-05	-0.239295	0.310384	-0.174678	0.161604	0.286464	0.0248019	-0.480726	0.000108085
BMPR1B-DT	-0.758333	0.000816195	0.261817	0.579973	0.660593	0.00513542	-0.253384	0.616134	-0.496516	0.0277187	-0.0977405	0.715086	-1.01172	1.2208e-05
BMPR2	0.561053	0.000913751	-0.273676	0.379081	-0.610712	0.000584663	-0.183369	0.626555	0.287378	0.0904548	-0.0496589	0.810329	0.377684	0.0235859
BMS1	-0.194273	1.23052e-05	0.011996	0.933516	0.0462831	0.334897	-0.061515	0.502617	-0.182277	3.76011e-05	-0.14799	0.000913991	-0.255788	3.33789e-08
BMS1P1	0.630985	1.72801e-05	0.016871	0.97496	-0.25551	0.0933826	0.0102045	0.981565	0.647856	1.15414e-05	0.375475	0.0109842	0.64119	1.1931e-05
BMS1P10	-0.0120317	0.95	-0.0935841	0.843742	-0.133769	0.48317	0.242261	0.495951	-0.105616	0.550957	-0.1458	0.432161	0.230229	0.168966
BMT2	-0.137734	0.204959	0.0360002	0.918079	0.212556	0.0614194	-0.133055	0.572296	-0.101733	0.35955	0.0748225	0.540331	-0.270788	0.0108067
BMX	-1.18245	1.43494e-06	-0.0120927	0.987399	-0.256266	0.324755	-0.184946	0.732152	-1.19454	1.23647e-06	-1.43872	2.6725e-08	-1.3674	4.96934e-08
BNC1	0.143179	0.256383	-0.218347	0.320715	-0.343274	0.00809012	-0.184104	0.482484	-0.0751679	0.567822	-0.200095	0.127537	-0.0409247	0.760729
BNC2	-0.594724	0.0107747	-0.0455427	0.959197	0.224925	0.394592	-0.15687	0.77986	-0.640267	0.00629457	-0.3698	0.137611	-0.751595	0.00129529
BNIP1	-0.319652	0.000682646	0.268555	0.0495156	0.171577	0.0852088	0.168671	0.361434	-0.0510971	0.609681	-0.148076	0.136429	-0.150981	0.105825
BNIP2	0.2532	0.0131666	-0.0514968	0.865888	-0.252993	0.0186941	-0.107398	0.643024	0.201703	0.0499227	0.000206212	0.998946	0.145802	0.156201
BNIP3	-0.503981	4.5796e-12	0.0935991	0.429045	0.423691	3.50811e-09	-0.0381707	0.798695	-0.410382	2.49532e-09	-0.0802896	0.229704	-0.542151	2.94363e-13
BNIP3L	-0.355335	3.90614e-06	0.0179694	0.945006	0.301823	0.000125006	0.064885	0.705944	-0.337366	1.06864e-05	-0.0535122	0.523791	-0.29045	0.000103684
BNIPL	-1.21682	7.37952e-12	0.0951042	0.81924	0.683443	2.76983e-05	0.263922	0.387506	-1.12172	1.04049e-10	-0.533377	0.000718324	-0.952898	8.30889e-09
BOC	0.337077	0.0533184	-0.0109153	0.985612	-0.424119	0.0206326	-0.0503699	0.919265	0.326162	0.063043	-0.0870421	0.671306	0.286707	0.0998452
BOD1	0.137286	0.0326114	0.0452282	0.78887	-0.0311006	0.686714	-0.0326007	0.838229	0.182514	0.0046942	0.106185	0.120016	0.104685	0.103819
BOD1L1	0.275274	1.1365e-05	-0.113786	0.278832	-0.160767	0.011538	-0.0405833	0.780596	0.161488	0.00786503	0.114507	0.0726005	0.23469	0.000130759
BOK	-0.173857	0.0223497	-0.045565	0.831071	0.109767	0.186315	0.0985027	0.554971	-0.219422	0.00415132	-0.0640896	0.452574	-0.0753539	0.334237
BOLA1	-0.432728	0.00105907	0.0165581	0.97496	0.265633	0.0566977	0.0620493	0.851131	-0.416169	0.00166705	-0.167095	0.239674	-0.370678	0.00455764
BOLA2-SMG1P6	-0.316885	0.00448328	0.270945	0.117007	0.346541	0.00309663	0.361848	0.0298655	-0.0459396	0.705442	0.029656	0.828659	0.0449628	0.707842
BOLA2B	-0.0163411	0.929225	-0.164114	0.654817	0.0563691	0.77738	0.168721	0.643461	-0.180455	0.278262	0.0400279	0.840947	0.15238	0.357607
BOLA3	0.369801	0.000380375	0.196754	0.265518	-0.0731181	0.540813	0.297375	0.0664735	0.566556	2.55297e-07	0.296683	0.00536059	0.667176	3.57824e-09
BOLA3-AS1	-0.49075	0.0020777	0.0458438	0.93023	0.234939	0.173931	0.0159278	0.973467	-0.444906	0.00526776	-0.255811	0.13062	-0.474822	0.00271592
BOP1	0.0189245	0.839127	0.084796	0.651863	0.199252	0.0223575	0.127865	0.462011	0.10372	0.221692	0.218177	0.0111765	0.14679	0.0760134
BORA	0.539052	1.93427e-10	0.0823877	0.612463	-0.310522	9.55608e-05	0.0662252	0.701918	0.621439	2.21058e-12	0.22853	0.00309347	0.605277	3.90443e-12
BORCS5	-0.436797	8.59283e-08	0.122843	0.383627	0.255009	0.00141915	0.034369	0.857802	-0.313953	5.52518e-05	-0.181787	0.0213103	-0.402428	4.92135e-07
BORCS6	-0.119902	0.215486	0.0215329	0.949739	0.0448658	0.695032	0.0801685	0.716347	-0.0983694	0.317393	-0.0750366	0.4841	-0.0397338	0.698008
BORCS7	-0.560849	1.78361e-08	0.0664021	0.779857	0.114262	0.256298	0.00675372	0.980664	-0.494446	3.73839e-07	-0.446586	4.59873e-06	-0.554095	2.08018e-08
BORCS8	0.151437	0.132262	-0.117946	0.571426	-0.216685	0.039772	0.0307849	0.912564	0.0334906	0.759956	-0.0652484	0.568879	0.182222	0.0668406
BORCS8-MEF2B	0.165135	0.37756	0.0464565	0.940659	-0.375976	0.04952	-0.10183	0.818445	0.211592	0.254593	-0.210841	0.284347	0.063305	0.746925
BPGM	0.150332	0.136422	-0.00818473	0.981567	-0.272526	0.00947332	0.174781	0.384838	0.142147	0.163145	-0.122194	0.260597	0.325113	0.00115412
BPHL	-0.763272	3.92076e-16	-0.0180207	0.944082	0.223323	0.00338562	-0.0654755	0.696398	-0.781293	1.76478e-16	-0.53995	1.31603e-10	-0.828748	9.82309e-18
BPI	0.802588	1.24371e-05	-0.205314	0.583202	-0.323729	0.0882647	-0.208639	0.595597	0.597274	0.000876858	0.478859	0.00931193	0.593949	0.000841992
BPIFA1	0.574774	3.58071e-07	-0.0444017	0.893775	0.39362	0.00046482	0.154665	0.495951	0.530373	2.04152e-06	0.968394	1.44206e-13	0.72944	7.37392e-10
BPIFA2	-0.380857	0.00785831	-0.00536258	0.990273	0.868603	7.54408e-08	0.0588037	0.874626	-0.38622	0.00726733	0.487746	0.00105905	-0.322054	0.0237783
BPIFB1	0.414968	0.000153797	-0.01608	0.969428	0.427046	0.000194446	0.121395	0.616414	0.398888	0.000273813	0.842014	2.87016e-11	0.536363	1.87683e-06
BPIFB4	-0.30138	0.16506	-0.00521524	0.992865	0.84949	0.000195419	-0.00441255	0.993549	-0.306595	0.160756	0.54811	0.0138519	-0.305793	0.156128
BPNT1	-0.329882	1.33258e-09	0.0981416	0.232268	0.401857	1.76131e-11	-0.0107656	0.938307	-0.23174	5.25752e-06	0.0719758	0.167688	-0.340647	4.4316e-10
BPTF	0.014218	0.853549	-0.0822623	0.564636	-0.0715325	0.350837	-0.071293	0.64414	-0.0680444	0.33671	-0.0573145	0.453944	-0.057075	0.418781
BRAF	-0.0133658	0.898337	0.00240374	0.992764	0.0424399	0.703567	-0.00993576	0.970467	-0.0109621	0.918191	0.0290741	0.797959	-0.0233016	0.818927
BRAP	0.269495	1.98343e-08	-0.0453175	0.650116	-0.111914	0.0157143	0.0144863	0.906301	0.224178	1.40094e-06	0.157581	0.000592432	0.283982	4.28342e-09
BRAT1	-0.16946	0.0665568	0.00841075	0.980297	0.216615	0.0256485	-0.0499519	0.824779	-0.16105	0.0834366	0.0471543	0.663858	-0.219412	0.0164852
BRCA1	-0.711759	2.05822e-08	0.116727	0.660394	0.345741	0.00473208	0.0801522	0.773416	-0.595033	1.30621e-06	-0.366018	0.00246017	-0.631607	3.0923e-07
BRCA2	1.49971	1.65219e-13	0.000852095	0.998961	-0.591139	0.000816672	0.105954	0.791879	1.50057	1.76064e-13	0.908574	5.41317e-07	1.60567	1.03449e-14
BRCC3	-0.145316	0.00736823	-0.0448263	0.737958	0.1394	0.0145529	-0.0692958	0.562222	-0.190143	0.000545386	-0.0059163	0.932581	-0.214612	9.74013e-05
BRD1	0.163592	0.00535201	-0.0643731	0.616738	-0.0619286	0.347259	-0.0890421	0.470493	0.0992194	0.0949786	0.101664	0.102089	0.0745504	0.209274
BRD2	0.660994	1.87475e-19	-0.104367	0.238985	-0.372974	1.18412e-09	0.0493849	0.682794	0.556628	2.96122e-16	0.288021	4.13654e-07	0.710379	5.79773e-21
BRD3	0.111333	0.0492445	-0.0574573	0.654817	-0.0424342	0.516373	-0.116872	0.271261	0.0538754	0.359119	0.0688985	0.262376	-0.00553953	0.930131
BRD3OS	-1.06887	2.22585e-14	-0.0473531	0.893483	0.0721832	0.585705	-0.113376	0.658212	-1.11623	4.75637e-15	-0.99669	4.44182e-13	-1.18225	3.41684e-16
BRD4	0.260328	5.37964e-06	-0.0670473	0.559127	-0.112005	0.054885	0.00390118	0.981716	0.193281	0.000522807	0.148323	0.00927685	0.264229	3.68062e-06
BRD7	0.305193	2.15227e-11	-0.0296749	0.768858	-0.0987299	0.0168968	0.0407455	0.646759	0.275518	5.16702e-10	0.206463	1.10444e-06	0.345938	2.51293e-13
BRD8	-0.172652	0.0162108	0.100136	0.480889	0.201586	0.00761894	0.0191004	0.926286	-0.0725155	0.330298	0.0289343	0.737448	-0.153552	0.0316995
BRD9	0.0407158	0.474367	-0.0167723	0.925734	0.0121936	0.860659	-0.00770552	0.960756	0.0239435	0.68483	0.0529094	0.378625	0.0330102	0.564177
BRF1	-0.228137	8.43991e-05	-0.0317803	0.845152	-0.0197128	0.778556	-0.0280341	0.84262	-0.259917	1.06819e-05	-0.24785	3.59411e-05	-0.256171	1.18932e-05
BRF2	0.531991	6.87556e-12	-0.0956739	0.458773	-0.333184	3.82852e-06	0.0529531	0.729689	0.436317	2.8816e-09	0.198808	0.00372671	0.584944	2.10425e-13
BRI3	0.153521	0.104087	-0.0960521	0.651845	-0.0898229	0.397785	-0.019286	0.942612	0.0574689	0.565724	0.063698	0.553649	0.134235	0.154694
BRI3BP	-0.908935	4.97978e-13	0.409856	0.00386757	0.814308	9.82806e-11	0.191523	0.351894	-0.499079	4.86955e-06	-0.0946268	0.416577	-0.717412	7.5596e-10
BRICD5	0.137212	0.519226	0.107602	0.854927	0.197016	0.388822	0.163078	0.728667	0.244814	0.238688	0.334227	0.120097	0.30029	0.139333
BRINP1	-0.555846	0.000338681	0.085829	0.844852	0.422881	0.00856696	-0.037192	0.932253	-0.470017	0.00230678	-0.132965	0.437037	-0.593038	0.000131546
BRIP1	4.47499	1.87475e-19	-0.242783	0.795573	-2.56467	7.88892e-10	0.0939639	0.926362	4.23221	2.54009e-18	1.91032	6.44724e-07	4.56895	5.66707e-20
BRIX1	0.0962189	0.165999	0.168569	0.11069	0.107978	0.145987	0.0146015	0.940578	0.264788	0.000155624	0.204197	0.00409132	0.11082	0.106675
BRK1	-0.351071	2.17736e-07	0.0277051	0.887922	0.269108	7.39703e-05	0.0817765	0.555618	-0.323366	1.35596e-06	-0.0819635	0.232104	-0.269295	3.27924e-05
BRMS1	-0.0442054	0.598728	0.002632	0.991318	-0.00460465	0.965808	0.0902789	0.609715	-0.0415734	0.625111	-0.0488101	0.592504	0.0460735	0.581565
BRMS1L	-0.538185	2.42765e-08	0.116545	0.515888	0.260579	0.00515849	-0.0741647	0.718351	-0.42164	5.27881e-06	-0.277606	0.00254973	-0.61235	6.36432e-10
BROX	0.154942	0.244284	0.0172583	0.973096	0.0162591	0.925623	-0.136225	0.643431	0.1722	0.195838	0.171201	0.223377	0.0187173	0.896831
BRPF1	0.105545	0.0428111	0.0285543	0.848981	0.051214	0.383516	-0.0154532	0.916697	0.1341	0.0102458	0.156759	0.00369491	0.0900921	0.0833912
BRPF3	0.378689	4.69507e-06	0.00990106	0.97496	-0.110519	0.202738	-0.0198102	0.930432	0.38859	3.01033e-06	0.26817	0.00114396	0.358879	1.1309e-05
BRSK1	-0.256679	0.157655	0.151393	0.731408	0.0976302	0.648833	-0.158904	0.703428	-0.105287	0.583725	-0.159049	0.427092	-0.415583	0.0197806
BRSK2	0.112357	0.697494	-0.0321323	0.97496	0.0885035	0.788718	0.202746	0.747531	0.080225	0.785259	0.200861	0.50653	0.315103	0.243468
BRWD1	0.0833967	0.438269	-0.0362804	0.913537	-0.0218942	0.86939	-0.0710738	0.772573	0.0471164	0.673073	0.0615025	0.606597	0.0123229	0.914567
BRWD1-AS2	-0.851364	7.73436e-06	0.418653	0.150775	0.364315	0.0616935	0.175903	0.675656	-0.432711	0.0185997	-0.487049	0.0104583	-0.675461	0.000260527
BRWD3	0.24131	0.110031	-0.206185	0.488463	-0.209754	0.200424	-0.247403	0.422787	0.0351251	0.834393	0.0315553	0.866512	-0.00609375	0.971595
BSCL2	-0.200366	0.0910072	-0.0840019	0.785786	-0.364528	0.00327115	0.0219546	0.948414	-0.284368	0.0161684	-0.564894	6.83077e-06	-0.178411	0.131332
BSDC1	0.186171	1.04158e-05	-0.0215856	0.855725	0.0124838	0.80662	0.00980692	0.932931	0.164585	8.11782e-05	0.198655	4.94865e-06	0.195978	3.68145e-06
BSG	0.191862	0.00267298	-0.0183952	0.93023	-0.106778	0.119541	0.111028	0.387506	0.173467	0.00668485	0.0850843	0.215833	0.30289	4.59645e-06
BSN	0.244378	0.0995106	0.111135	0.7691	-0.454007	0.00339511	-0.144622	0.667676	0.355513	0.0162235	-0.209629	0.18566	0.0997557	0.518301
BSND	0.0556943	0.85148	-0.216016	0.743201	0.21773	0.472244	-0.21612	0.723558	-0.160321	0.569668	0.273424	0.347395	-0.160426	0.564685
BSPRY	0.0516071	0.455409	0.183714	0.0600695	0.306835	1.70013e-05	0.0531937	0.728667	0.235321	0.000448922	0.358442	5.62637e-07	0.104801	0.113289
BST1	0.460148	0.000282688	-0.285768	0.150634	-0.126841	0.36692	-0.131026	0.643129	0.17438	0.171526	0.333308	0.01017	0.329122	0.00809615
BST2	4.79965	3.00242e-38	-0.151862	0.691607	-1.16514	9.37802e-10	0.192974	0.592291	4.64779	1.97928e-37	3.63451	2.82533e-31	4.99262	3.1325e-39
BTAF1	0.270464	0.0372863	0.0197485	0.968402	-0.102914	0.490589	-0.0685709	0.830884	0.290213	0.0259951	0.16755	0.232926	0.201893	0.120842
BTBD1	-0.286673	0.000113844	0.0269515	0.909348	0.0222175	0.807205	-0.039067	0.827239	-0.259722	0.000444137	-0.264456	0.000498272	-0.32574	1.37932e-05
BTBD10	0.150769	0.000237443	-0.0460288	0.593399	-0.138387	0.00116956	0.0114551	0.920359	0.10474	0.00977764	0.012382	0.803473	0.162224	7.83946e-05
BTBD11	0.990204	3.80592e-08	-0.159909	0.680578	-0.754131	2.48606e-05	0.0656509	0.880593	0.830294	2.01917e-06	0.236072	0.185914	1.05585	6.29071e-09
BTBD16	-0.40923	0.110381	-0.163296	0.813503	0.15878	0.596464	0.18504	0.759747	-0.572525	0.024933	-0.25045	0.373274	-0.224189	0.392268
BTBD19	0.273439	0.0507446	-0.343799	0.110034	-0.465722	0.00156392	-0.137372	0.666733	-0.0703609	0.640435	-0.192284	0.201308	0.136067	0.34228
BTBD2	-0.090665	0.126202	-0.0216561	0.909621	0.181599	0.00328499	0.00520861	0.976513	-0.112321	0.0576594	0.0909341	0.147459	-0.0854564	0.147634
BTBD3	-0.0305005	0.763714	-0.0700974	0.768327	-0.239019	0.0140425	-0.068492	0.755346	-0.100598	0.292245	-0.26952	0.00495493	-0.0989924	0.293953
BTBD6	-0.0959872	0.208045	-0.0269294	0.91194	0.0590062	0.493595	0.0791041	0.641163	-0.122917	0.105561	-0.0369811	0.675685	-0.0168832	0.838559
BTBD7	-0.368474	0.000118601	0.0345686	0.909711	0.244826	0.0131776	-0.0554627	0.809033	-0.333906	0.000459133	-0.123648	0.222823	-0.423937	1.1694e-05
BTBD8	-0.0819683	0.751326	-0.183464	0.760522	-3.27182e-05	0.999876	-0.440506	0.339611	-0.265432	0.275049	-0.082001	0.775689	-0.522475	0.0258182
BTBD9	-0.400226	3.86819e-06	-0.00751475	0.980408	-0.0908678	0.326927	-0.080718	0.671035	-0.40774	2.83307e-06	-0.491093	7.5961e-08	-0.480944	6.62041e-08
BTC	1.63514	9.34273e-15	-0.247328	0.449966	-1.48797	2.17457e-12	0.0133937	0.979655	1.38781	3.44248e-12	0.14717	0.434477	1.64853	5.10547e-15
BTD	-0.072735	0.14498	0.0179459	0.910627	0.0732681	0.172521	0.0408861	0.720859	-0.0547891	0.282121	0.000533123	0.993209	-0.0318489	0.539069
BTF3	-0.403591	1.69235e-07	0.0453383	0.818884	0.335744	1.62354e-05	0.0718283	0.661422	-0.358253	2.2688e-06	-0.0678465	0.397229	-0.331763	8.34465e-06
BTF3L4	0.065379	0.396228	0.0974455	0.516737	0.032299	0.720648	-0.00185622	0.991968	0.162824	0.0288346	0.097678	0.22289	0.0635228	0.406286
BTG1	0.631142	2.94769e-17	-0.198361	0.0108028	-0.392513	2.11445e-09	-0.0393393	0.768761	0.432781	3.16097e-11	0.238628	5.58578e-05	0.591803	2.97397e-16
BTG2	-0.19449	1.4992e-05	-0.0434811	0.660971	0.1965	2.67313e-05	-0.0229278	0.831069	-0.237971	2.98288e-07	0.00201052	0.971686	-0.217418	1.7136e-06
BTG3	0.456093	4.52661e-09	-0.0208538	0.928557	0.0656416	0.411524	-0.00115444	0.995147	0.435239	1.66079e-08	0.521734	1.56571e-10	0.454938	4.1343e-09
BTG3-AS1	0.434082	0.00118654	-0.139934	0.637654	-0.176188	0.227912	-0.0545127	0.874626	0.294149	0.0276385	0.257894	0.0653797	0.37957	0.00417871
BTG4	-1.00207	7.65099e-08	0.062763	0.910945	-0.275737	0.140622	0.158541	0.692184	-0.939307	3.5821e-07	-1.27781	1.70139e-10	-0.84353	2.83318e-06
BTN2A1	1.12339	6.67811e-23	-0.225318	0.0377294	-0.642102	5.32899e-12	0.00191368	0.991883	0.898074	2.06047e-18	0.48129	8.90472e-09	1.12531	5.12857e-23
BTN2A2	0.228614	0.00521878	-0.386433	0.000353614	-0.55545	4.39585e-09	-0.285883	0.0167713	-0.157819	0.0554594	-0.326836	0.000138452	-0.0572697	0.502698
BTN2A3P	0.982828	6.43152e-10	-0.201462	0.468779	-0.378278	0.0109941	-0.209522	0.488542	0.781366	2.45291e-07	0.60455	5.01422e-05	0.773306	2.58128e-07
BTN3A1	2.56861	5.60233e-27	-0.238704	0.355824	-1.08866	1.44484e-10	0.0122755	0.977174	2.32991	1.00948e-24	1.47996	9.36738e-16	2.58089	4.04039e-27
BTN3A2	1.86328	3.96889e-22	-0.196863	0.42289	-0.836155	1.4067e-08	0.00227877	0.994732	1.66642	7.9295e-20	1.02713	1.49918e-11	1.86556	2.95268e-22
BTNL8	-1.00061	0.00010346	-0.0442043	0.962341	0.0504944	0.877635	-0.0716971	0.920359	-1.04482	5.66344e-05	-0.950118	0.000317739	-1.07231	3.30578e-05
BTNL9	-0.24268	0.156681	0.0287556	0.962676	0.458635	0.00996896	0.0562563	0.90549	-0.213924	0.217172	0.215955	0.238732	-0.186424	0.279381
BTRC	0.0919289	0.0763454	-0.0594352	0.586902	-0.0432621	0.46429	0.0196681	0.887997	0.0324937	0.554963	0.0486668	0.396621	0.111597	0.0297721
BUB1	0.546777	0.00458687	0.0920333	0.87609	-0.136624	0.542446	0.2263	0.596197	0.638811	0.00104055	0.410153	0.0421197	0.773077	7.95639e-05
BUB1B	-0.993535	6.69521e-08	0.481166	0.0557073	0.993827	1.89669e-07	0.18524	0.629127	-0.512369	0.00284197	0.000291443	0.999123	-0.808295	4.87416e-06
BUB3	0.126998	0.00391668	-0.0444518	0.657021	-0.0663207	0.164954	0.0503439	0.6079	0.0825466	0.0624901	0.0606776	0.199903	0.177342	7.31609e-05
BUD13	-0.0557729	0.362271	0.036833	0.821448	-0.0799921	0.217629	0.0691628	0.596533	-0.0189398	0.771771	-0.135765	0.0278841	0.0133899	0.837626
BUD23	-0.219363	0.00338489	0.061812	0.737734	-0.0233097	0.803129	0.0567199	0.748511	-0.157551	0.0358818	-0.242673	0.00176117	-0.162643	0.0285763
BUD31	0.10279	0.19985	-0.0227413	0.93023	-0.174313	0.0364842	0.0882123	0.618536	0.0800486	0.327216	-0.0715228	0.415848	0.191002	0.0147803
BVES	0.752968	4.118e-05	-0.579621	0.0223023	-1.36275	1.85535e-10	-0.237014	0.543293	0.173346	0.350628	-0.609778	0.00103782	0.515954	0.00378778
BYSL	-0.117701	0.23883	0.199789	0.22415	0.308226	0.00274558	0.0975336	0.661422	0.0820877	0.422666	0.190525	0.0641259	-0.0201674	0.852125
BZW1	0.0607759	0.400935	0.0981678	0.475327	0.194477	0.00787958	0.0300095	0.866859	0.158944	0.0229728	0.255253	0.000442382	0.0907854	0.196881
BZW1P2	-0.0367463	0.831153	-0.17066	0.608034	0.137578	0.429798	-0.0841679	0.823255	-0.207407	0.184988	0.100832	0.566457	-0.120914	0.446943
BZW2	-0.268296	0.00205428	0.172185	0.241727	0.455955	1.67399e-06	0.116723	0.536067	-0.0961114	0.282766	0.187659	0.0386643	-0.151573	0.080194
C10orf111	-0.461518	0.0177066	0.168333	0.722803	-0.0401115	0.873816	0.179252	0.691103	-0.293185	0.139008	-0.50163	0.0131748	-0.282266	0.149179
C10orf143	-0.472305	0.00147412	0.154009	0.643245	0.259582	0.101523	-0.0694608	0.852364	-0.318295	0.0319795	-0.212723	0.179795	-0.541765	0.0002779
C10orf25	0.40393	0.00265647	0.142616	0.632278	-0.12437	0.413488	0.155447	0.600993	0.546547	7.0504e-05	0.279561	0.0465655	0.559377	4.33788e-05
C10orf55	-0.0649646	0.665376	-0.468654	0.0166947	-0.499941	0.000701194	-0.0424655	0.914409	-0.533619	0.00017706	-0.564906	0.000113831	-0.10743	0.458619
C10orf67	-1.08705	1.57052e-07	-0.129415	0.801255	-0.804885	9.93343e-05	-0.33185	0.396339	-1.21647	1.06989e-08	-1.89194	1.15152e-14	-1.4189	1.06938e-10
C10orf88	0.0290141	0.712178	0.0457177	0.817033	-0.0305835	0.729758	-0.0618986	0.714706	0.0747319	0.318011	-0.00156936	0.987626	-0.0328845	0.672281
C10orf91	-0.217522	0.324249	-0.126446	0.834604	0.336007	0.147789	0.0925601	0.866205	-0.343968	0.11368	0.118485	0.63522	-0.124962	0.581376
C10orf95	-1.13567	1.29676e-09	-0.0708713	0.892831	-0.613432	0.000542142	-0.158016	0.683311	-1.20654	2.40251e-10	-1.7491	9.61565e-16	-1.29368	2.10465e-11
C10orf99	0.1097	0.735431	-0.207981	0.789753	0.0357438	0.92868	-0.205021	0.772164	-0.0982809	0.76352	0.145444	0.678039	-0.0953215	0.768905
C11orf1	-0.21961	0.0215297	0.032759	0.915505	0.219599	0.0295336	0.0312963	0.906904	-0.186851	0.0523306	-1.09996e-05	0.99996	-0.188314	0.0479739
C11orf16	-0.824975	7.33899e-07	-0.109714	0.791695	-0.179332	0.305404	-0.0578505	0.893855	-0.934689	4.534e-08	-1.00431	1.1285e-08	-0.882825	1.45794e-07
C11orf24	0.188916	0.0142322	0.13591	0.324267	0.138145	0.0945655	0.112075	0.497142	0.324826	4.28129e-05	0.327061	5.64456e-05	0.30099	0.000118988
C11orf44	-0.487932	0.0416251	-0.237439	0.664896	0.0684356	0.820032	0.0702528	0.918019	-0.72537	0.00261535	-0.419496	0.0975907	-0.417679	0.0807669
C11orf45	-0.358328	0.0199424	-0.136298	0.714444	-0.0101113	0.961732	0.144031	0.685333	-0.494626	0.00147192	-0.368439	0.0217339	-0.214298	0.167409
C11orf49	-0.683865	3.85067e-09	-0.0647462	0.824257	-0.038644	0.76451	-0.0373087	0.89792	-0.748611	3.22009e-10	-0.722509	1.37201e-09	-0.721174	7.44507e-10
C11orf52	-0.48627	0.00371969	-0.124354	0.773194	-0.578457	0.00105827	-0.261337	0.455631	-0.610624	0.000331692	-1.06473	1.20457e-08	-0.747607	1.40456e-05
C11orf54	-0.344539	7.09122e-07	0.114378	0.332219	0.294098	3.14032e-05	0.0209548	0.909709	-0.23016	0.000546412	-0.0504411	0.497274	-0.323584	2.30566e-06
C11orf58	0.0680437	0.243451	0.0326743	0.841314	0.0216958	0.757138	-0.0102507	0.949843	0.100718	0.0806641	0.0897395	0.140874	0.057793	0.322349
C11orf65	-0.403514	0.011959	0.109976	0.79558	-0.195675	0.270525	0.0507358	0.911043	-0.293539	0.0702594	-0.599189	0.000354421	-0.352778	0.0272107
C11orf68	0.407103	3.0447e-05	-0.118753	0.544371	-0.319625	0.00140469	0.0872279	0.691376	0.28835	0.00255348	0.0874785	0.407582	0.494331	7.44055e-07
C11orf71	-0.270384	0.0172568	0.0546077	0.875417	-0.0164774	0.913393	0.0202311	0.950541	-0.215777	0.0595136	-0.286862	0.0151857	-0.250153	0.0267958
C11orf74	-0.94808	7.89534e-11	-0.0019931	0.996137	-0.199727	0.146941	0.014891	0.967897	-0.950073	7.88826e-11	-1.14781	2.11469e-13	-0.933189	1.03655e-10
C11orf80	-0.466431	4.21611e-08	-0.0269605	0.915505	0.239879	0.00367536	0.145138	0.347846	-0.493392	1.09084e-08	-0.226552	0.00541177	-0.321293	5.94381e-05
C11orf88	-1.56404	7.777e-11	0.0626763	0.928186	-0.0531394	0.841562	-0.00524315	0.991968	-1.50136	2.83492e-10	-1.61718	4.40637e-11	-1.56928	5.61801e-11
C11orf91	-0.270366	0.189911	0.137327	0.798187	-0.124953	0.602167	-0.115155	0.81795	-0.133039	0.538119	-0.395319	0.064307	-0.385521	0.0568261
C11orf94	-0.0493858	0.842616	-0.408039	0.290285	-0.100424	0.707179	-0.12169	0.82316	-0.457425	0.0392942	-0.14981	0.553898	-0.171076	0.455622
C11orf95	-0.58275	7.70329e-11	-0.0517727	0.804289	0.40403	2.32073e-06	-0.319092	0.00345653	-0.634523	5.41013e-12	-0.17872	0.0284142	-0.901842	6.47326e-18
C11orf96	0.000265325	0.999317	-0.177387	0.788309	0.210649	0.464253	-0.219022	0.70899	-0.177122	0.505991	0.210915	0.454089	-0.218757	0.398568
C11orf97	-1.69968	1.96488e-13	0.107441	0.843742	-0.338835	0.0967899	-0.0278208	0.959579	-1.59224	2.05661e-12	-2.03851	3.59341e-16	-1.7275	8.55568e-14
C11orf98	0.180229	0.140946	0.0860761	0.786965	-0.081248	0.565891	0.04106	0.903315	0.266305	0.0285645	0.0989805	0.467483	0.221289	0.0671441
C12orf10	-0.481773	2.39493e-06	0.00471217	0.988735	0.183571	0.0778321	0.0790503	0.727043	-0.477061	3.05604e-06	-0.298203	0.00319652	-0.402723	5.08245e-05
C12orf29	0.336918	0.00508092	0.119499	0.663617	0.175543	0.180027	-0.0399368	0.90549	0.456417	0.000195188	0.512461	5.18757e-05	0.296981	0.0129169
C12orf4	0.108241	0.144441	0.100979	0.488361	-0.0926264	0.252105	-0.00272364	0.989405	0.20922	0.00453526	0.0156144	0.864941	0.105517	0.152486
C12orf43	-0.125626	0.017779	0.0414397	0.759047	0.104148	0.0652613	0.026464	0.840465	-0.084186	0.118085	-0.0214777	0.735941	-0.0991617	0.0608058
C12orf45	-0.0219672	0.890397	0.265002	0.274364	0.154319	0.324192	0.389012	0.0847979	0.243035	0.086512	0.132352	0.39588	0.367045	0.00850193
C12orf49	-0.590152	6.80044e-14	0.0312574	0.872253	0.320415	4.5832e-06	-0.103635	0.434277	-0.558895	5.12234e-13	-0.269738	6.4522e-05	-0.693787	9.94719e-17
C12orf54	0.00161595	0.992396	-0.109699	0.756753	-0.140575	0.371055	0.0357061	0.928954	-0.108083	0.462165	-0.138959	0.368097	0.037322	0.808025
C12orf56	-0.624085	7.48139e-05	0.259138	0.357047	0.828447	1.06575e-06	0.0378022	0.931993	-0.364947	0.0182582	0.204362	0.219359	-0.586283	0.000170143
C12orf57	-0.271674	0.0190028	0.0349157	0.927349	0.300929	0.0135714	0.147444	0.564045	-0.236759	0.0423473	0.0292544	0.837986	-0.124231	0.293145
C12orf60	-0.236631	0.0834111	0.0626113	0.881414	-0.0694357	0.669823	0.0452076	0.90549	-0.17402	0.211319	-0.306067	0.0313279	-0.191424	0.162106
C12orf65	0.104095	0.264433	0.042731	0.879336	0.034088	0.760495	-0.0520465	0.816581	0.146826	0.112305	0.138183	0.156335	0.0520483	0.589632
C12orf66	-0.0966422	0.313855	0.0508185	0.850011	0.101899	0.327853	-0.166972	0.369416	-0.0458238	0.6489	0.00525674	0.965576	-0.263614	0.00452269
C12orf73	-0.340034	0.00245651	0.0855374	0.766252	0.266941	0.0236003	0.0202063	0.949643	-0.254497	0.023482	-0.0730928	0.570071	-0.319828	0.00412933
C12orf74	0.627528	0.000115986	-0.040365	0.942663	-0.416372	0.0131648	-0.135064	0.71551	0.587163	0.000299648	0.211156	0.220605	0.492464	0.00200988
C12orf75	-0.987855	3.40208e-12	-0.234629	0.251863	-0.559244	1.63636e-05	-0.0505873	0.871103	-1.22248	1.65115e-15	-1.5471	2.02527e-19	-1.03844	4.83929e-13
C12orf76	-0.113215	0.306424	-0.0744047	0.793267	-0.338271	0.00280192	-0.0269197	0.930232	-0.187619	0.084478	-0.451485	6.63598e-05	-0.140134	0.197327
C14orf119	0.0503254	0.424869	0.00215103	0.991099	0.00810763	0.919875	0.00831151	0.962263	0.0524765	0.405973	0.0584331	0.382911	0.0586369	0.344049
C14orf132	-1.66228	2.53592e-13	-0.132701	0.787625	0.403524	0.0420506	-0.30055	0.439442	-1.79498	1.70362e-14	-1.25876	2.76583e-09	-1.96283	3.67741e-16
C14orf178	-0.288102	0.260388	-0.125446	0.866606	0.0862615	0.780183	0.11805	0.851652	-0.413549	0.102679	-0.201841	0.473755	-0.170053	0.516257
C14orf28	0.123619	0.194629	-0.028916	0.925947	-0.0140422	0.910913	-0.0982205	0.643191	0.0947025	0.329884	0.109576	0.284168	0.025398	0.80556
C14orf39	0.237243	0.181964	-0.142306	0.745124	0.0235486	0.919875	0.0492337	0.921211	0.0949367	0.614053	0.260792	0.164286	0.286477	0.102336
C14orf93	0.20848	0.0124127	0.0511338	0.825541	-0.0564047	0.562825	-0.0210091	0.92985	0.259614	0.00203488	0.152075	0.0844191	0.187471	0.0238355
C15orf39	0.476747	1.90704e-10	-0.112031	0.34727	-0.304544	1.80936e-05	0.0761368	0.602314	0.364716	2.27222e-07	0.172203	0.011751	0.552884	1.29593e-12
C15orf40	-0.429247	8.77747e-08	0.00859187	0.97496	0.118523	0.141664	0.0159047	0.940538	-0.420656	1.51089e-07	-0.310724	7.34531e-05	-0.413343	1.87043e-07
C15orf41	-0.250793	0.00508125	0.0511935	0.841314	0.375711	8.65767e-05	-0.137864	0.463438	-0.1996	0.0262742	0.124917	0.194298	-0.388657	2.24877e-05
C15orf48	1.52603	9.23507e-16	-0.0270808	0.961193	-0.503174	0.00127573	0.0421013	0.920314	1.49894	2.0372e-15	1.02285	1.24212e-09	1.56813	2.31225e-16
C15orf56	-0.818615	7.58521e-07	0.354775	0.155446	0.495929	0.00260066	0.323227	0.271431	-0.46384	0.00321948	-0.322686	0.0492083	-0.495388	0.00154966
C15orf61	-0.470375	0.000206574	0.190393	0.423428	0.497204	0.000180886	0.102086	0.723558	-0.279982	0.0253697	0.0268287	0.863371	-0.368289	0.00306605
C15orf62	0.60588	8.55417e-08	0.165252	0.403304	0.187549	0.0958314	0.364143	0.0181819	0.771131	1.38179e-10	0.793428	8.69864e-11	0.970023	4.61503e-14
C15orf65	-0.499024	0.000138415	0.249075	0.256674	0.064207	0.676676	0.115681	0.69797	-0.249949	0.053611	-0.434817	0.00113814	-0.383343	0.00279339
C16orf45	-0.718989	6.66237e-18	0.0274054	0.886297	0.325125	1.68298e-06	-0.0577246	0.686139	-0.691583	3.98079e-17	-0.393864	1.1717e-08	-0.776713	1.83446e-19
C16orf46	-0.577846	3.43135e-05	-0.13254	0.672814	-0.186155	0.210562	-0.0988301	0.759395	-0.710386	7.91565e-07	-0.764001	2.4718e-07	-0.676676	1.82614e-06
C16orf54	-0.103194	0.61681	-0.457282	0.131768	-1.05899	7.21827e-07	-0.427633	0.220827	-0.560476	0.00391714	-1.16219	5.11812e-08	-0.530827	0.0057972
C16orf58	0.341109	1.04046e-06	0.0797722	0.564636	0.188878	0.00665703	0.0646073	0.669583	0.420882	8.02639e-09	0.529987	1.33049e-11	0.405717	1.65351e-08
C16orf70	0.499618	1.96603e-16	-0.0589324	0.538966	-0.315357	4.85672e-09	0.0307974	0.783977	0.440685	2.72847e-14	0.18426	0.000161104	0.530415	1.21113e-17
C16orf71	-1.18023	1.69699e-09	-0.133596	0.767853	-0.842585	9.76285e-06	-0.187009	0.638374	-1.31383	7.867e-11	-2.02282	2.14563e-17	-1.36724	1.6717e-11
C16orf72	0.165102	0.0618922	0.0454389	0.861271	-0.0637238	0.53358	0.0151335	0.952192	0.210541	0.0173136	0.101378	0.292735	0.180235	0.0400341
C16orf74	-0.0497429	0.729423	-0.0787242	0.831007	0.0296837	0.860207	0.203385	0.46186	-0.128467	0.346693	-0.0200592	0.903707	0.153643	0.249964
C16orf86	-0.589113	0.00175091	-0.00568523	0.991866	0.450928	0.0223334	0.222568	0.59304	-0.594798	0.00165402	-0.138185	0.516736	-0.366545	0.0495285
C16orf87	0.193721	0.0199283	-0.0707452	0.729246	0.02027	0.848302	-0.0842982	0.65617	0.122975	0.14713	0.213991	0.0133947	0.109422	0.193281
C16orf89	0.0237527	0.89321	-0.0725301	0.879872	0.370433	0.0239391	0.283623	0.358256	-0.0487775	0.776852	0.394185	0.0148702	0.307376	0.0474286
C16orf91	0.276571	0.00180659	-0.0370359	0.893527	-0.0574037	0.578989	-0.0307174	0.901498	0.239535	0.00685038	0.219167	0.0169876	0.245853	0.00513315
C16orf95	0.0600322	0.731291	0.111705	0.790642	0.249924	0.148988	0.240006	0.478857	0.171738	0.298452	0.309956	0.0653662	0.300038	0.0597216
C17orf100	0.131115	0.234556	0.0568195	0.856914	0.258255	0.0232912	0.0949843	0.706374	0.187934	0.0852346	0.38937	0.000545319	0.226099	0.0354539
C17orf107	-0.301344	0.0145109	0.337213	0.0657836	0.784269	2.39522e-08	0.171326	0.519684	0.0358684	0.792863	0.482925	0.000184349	-0.130019	0.302014
C17orf113	-0.292774	0.164678	0.0504302	0.945123	0.030234	0.913208	0.178061	0.714706	-0.242344	0.257712	-0.26254	0.244225	-0.114713	0.603514
C17orf49	0.0905705	0.617551	-0.479977	0.0555171	0.0108626	0.962394	-0.219296	0.555618	-0.389407	0.0224913	0.101433	0.606714	-0.128726	0.466449
C17orf51	-0.341473	0.00164855	0.238686	0.172757	0.120082	0.318437	0.128699	0.591984	-0.102787	0.359676	-0.22139	0.0505184	-0.212773	0.0478407
C17orf53	-0.22267	0.123993	0.126081	0.716485	0.264907	0.0841962	0.218285	0.468331	-0.0965896	0.52617	0.042237	0.811322	-0.00438543	0.9787
C17orf58	-0.522522	2.26038e-08	0.143116	0.36358	0.29694	0.00104614	-0.00666235	0.979965	-0.379406	1.94522e-05	-0.225581	0.0113622	-0.529184	1.40273e-08
C17orf67	2.34888	4.35075e-19	-0.305775	0.385842	-1.52866	3.5102e-11	0.137524	0.760507	2.0431	1.77539e-16	0.820221	4.12192e-05	2.4864	2.69606e-20
C17orf75	-0.202609	0.000412781	0.018341	0.921994	0.0868796	0.157783	-0.00598114	0.971432	-0.184268	0.00128211	-0.115729	0.0514967	-0.20859	0.000264383
C17orf80	-0.166698	0.0114703	0.0321586	0.872253	0.0483507	0.527363	-0.0453246	0.773974	-0.134539	0.0427434	-0.118347	0.0896557	-0.212022	0.00132479
C17orf82	-0.74488	7.50715e-05	-0.0406432	0.951655	-0.189222	0.360322	-0.0919887	0.840439	-0.785523	3.44594e-05	-0.934102	2.2387e-06	-0.836869	1.02644e-05
C17orf97	-0.806897	1.36201e-06	-0.0287189	0.961759	-0.433339	0.0094108	-0.0396693	0.930399	-0.835616	6.98752e-07	-1.24024	2.89091e-11	-0.846567	4.45939e-07
C17orf99	-0.272734	0.248463	-0.145543	0.818695	0.199589	0.450163	0.059628	0.927987	-0.418277	0.0729743	-0.0731454	0.797182	-0.213106	0.369659
C18orf21	0.369072	5.71712e-06	0.027211	0.914732	-0.140259	0.0937632	0.00848843	0.970243	0.396284	1.51761e-06	0.228813	0.00474953	0.377561	3.37757e-06
C18orf25	0.39831	0.000123026	-0.110772	0.620011	-0.428267	8.38553e-05	0.0260079	0.928954	0.287537	0.0049082	-0.029957	0.811328	0.424317	4.38963e-05
C18orf32	-0.0997728	0.0489866	0.0458272	0.705595	0.0453819	0.430603	0.0199167	0.881576	-0.0539456	0.30218	-0.0543909	0.327375	-0.0798561	0.115226
C18orf54	-0.285934	0.0955158	0.150678	0.71481	0.458851	0.0105013	0.063206	0.892103	-0.135255	0.450417	0.172918	0.357731	-0.222728	0.19592
C18orf65	-0.809702	3.91139e-05	-0.0372645	0.959233	0.322621	0.117967	-0.143238	0.753528	-0.846967	1.96623e-05	-0.487082	0.0145059	-0.95294	1.94405e-06
C19orf12	-0.0119408	0.844626	-0.0751696	0.482895	-0.106466	0.0649743	-0.0444341	0.72268	-0.0871103	0.112983	-0.118407	0.0366879	-0.0563749	0.308631
C19orf18	0.293278	0.083372	-0.108239	0.813503	-0.0990535	0.619906	-0.0434438	0.9281	0.185039	0.287488	0.194224	0.291468	0.249834	0.139959
C19orf24	-0.0175363	0.877271	0.0872087	0.720475	0.0116788	0.931215	0.112396	0.618212	0.0696724	0.512061	-0.00585744	0.964242	0.0948594	0.356772
C19orf25	0.12019	0.216708	-0.00464749	0.988698	-0.148314	0.151944	0.0291445	0.913965	0.115542	0.238835	-0.0281246	0.811322	0.149334	0.118809
C19orf33	0.236573	0.0568139	0.0348997	0.932356	0.0182675	0.911946	0.308434	0.141296	0.271473	0.029084	0.254841	0.0497129	0.545007	1.82137e-05
C19orf38	2.00937	1.28747e-13	-0.140735	0.816898	-1.26763	3.06914e-07	0.154145	0.771176	1.86863	1.76478e-12	0.741735	0.00132542	2.16351	6.3536e-15
C19orf44	-0.288692	0.00709044	-0.128045	0.568461	-0.392081	0.000549419	-0.165688	0.462011	-0.416737	0.000141687	-0.680774	1.26733e-08	-0.45438	3.38956e-05
C19orf47	0.0144994	0.836165	0.165551	0.076297	0.119978	0.0710361	0.134131	0.240836	0.180051	0.00405636	0.134478	0.0393295	0.14863	0.016425
C19orf48	0.210511	0.0732989	0.194941	0.364848	0.279187	0.0236144	0.183054	0.454844	0.405452	0.000631282	0.489698	6.96868e-05	0.393565	0.000803294
C19orf53	-0.254286	0.0104143	0.0255375	0.940725	0.209442	0.0466509	0.116384	0.596533	-0.228748	0.0217678	-0.044844	0.703698	-0.137902	0.168276
C19orf54	0.22156	0.0112177	-0.0543386	0.822354	-0.0589554	0.563755	-0.101121	0.602314	0.167222	0.0576558	0.162605	0.0777941	0.120439	0.171739
C19orf57	-0.0691853	0.64549	0.0753322	0.853027	0.125319	0.43302	0.0214831	0.958033	0.00614691	0.969893	0.0561338	0.739052	-0.0477022	0.75508
C19orf66	3.25723	4.31385e-32	-0.298189	0.21038	-1.2001	1.09159e-11	0.146487	0.652742	2.95904	7.80267e-30	2.05713	1.79674e-21	3.40372	3.60118e-33
C19orf67	-0.409276	0.124894	-0.0871295	0.920849	-0.77516	0.00524312	-0.0832447	0.911043	-0.496405	0.0624049	-1.18444	2.29049e-05	-0.49252	0.0615968
C19orf70	-0.470168	0.000122289	0.0594213	0.868233	0.244295	0.0554082	0.101847	0.715331	-0.410746	0.000727138	-0.225873	0.0742791	-0.36832	0.00212125
C19orf71	-0.167063	0.438391	-0.316019	0.421729	-0.0549607	0.833456	-0.0254509	0.966587	-0.483082	0.0196655	-0.222024	0.327084	-0.192514	0.363913
C19orf73	-0.378448	0.0676747	-0.0173424	0.981199	0.142444	0.55432	0.120937	0.810163	-0.39579	0.0570458	-0.236004	0.295666	-0.257511	0.217783
C1D	0.042968	0.636209	0.047694	0.844735	0.0792501	0.411078	0.00871702	0.972352	0.090662	0.301501	0.122218	0.179977	0.051685	0.56399
C1GALT1	1.40501	2.54652e-15	-0.145629	0.643734	-0.863018	4.96998e-08	0.0525714	0.889786	1.25938	1.60008e-13	0.541995	0.000212903	1.45758	4.4287e-16
C1GALT1C1	0.909931	1.52976e-17	-0.141228	0.321088	-0.569234	1.16991e-09	0.0308817	0.884973	0.768703	1.34996e-14	0.340697	5.10232e-05	0.940812	2.75093e-18
C1GALT1C1L	-0.495284	0.00163271	0.0795198	0.864175	0.309613	0.0629879	-0.0959371	0.800042	-0.415764	0.00809699	-0.18567	0.276242	-0.591221	0.000186549
C1orf109	-0.0586986	0.35875	0.150905	0.11533	0.168849	0.00937234	0.0181576	0.918019	0.092206	0.142733	0.11015	0.0918321	-0.040541	0.531703
C1orf112	0.0332239	0.615595	-0.0201474	0.921931	0.00585444	0.945022	-0.0114401	0.948778	0.0130765	0.852659	0.0390783	0.584964	0.0217838	0.74668
C1orf115	-0.558577	1.81866e-06	0.21812	0.25069	0.695032	3.85903e-08	0.0782884	0.767471	-0.340456	0.00242676	0.136455	0.260033	-0.480288	2.57775e-05
C1orf116	1.14308	7.84518e-18	-0.183498	0.286128	-0.561623	3.19628e-07	0.165017	0.414082	0.959579	9.55199e-15	0.581454	8.44253e-08	1.30809	1.70991e-20
C1orf122	0.092816	0.469327	0.0839869	0.795359	0.120191	0.384477	0.189896	0.460905	0.176803	0.15637	0.213007	0.100098	0.282712	0.0201144
C1orf123	-0.170387	0.0230888	0.0924213	0.553428	0.247541	0.00174364	0.148829	0.299919	-0.0779656	0.315568	0.0771537	0.35084	-0.0215582	0.793896
C1orf131	0.326183	1.74786e-05	-0.00550839	0.9835	-0.0551866	0.516567	0.0165405	0.937772	0.320675	2.45041e-05	0.270996	0.00041415	0.342723	6.66942e-06
C1orf141	-1.98743	3.45879e-16	-0.021512	0.97496	-0.544494	0.00588157	-0.236257	0.568708	-2.00894	2.54783e-16	-2.53193	2.96032e-20	-2.22369	2.46993e-18
C1orf147	0.791586	0.00120159	-0.277124	0.592916	-0.471408	0.0685029	-0.201561	0.720797	0.514462	0.0350243	0.320178	0.22226	0.590025	0.0144922
C1orf158	-1.22918	1.80542e-08	-0.239722	0.566798	-1.42969	1.11904e-09	-0.303678	0.469957	-1.4689	1.35839e-10	-2.65887	5.26035e-20	-1.53286	2.70167e-11
C1orf159	0.236238	0.00387634	-0.0445422	0.849928	0.0525028	0.584142	0.123699	0.472154	0.191696	0.0193153	0.288741	0.000685696	0.359937	1.77283e-05
C1orf167	0.240217	0.17361	0.0418373	0.945753	-0.226883	0.23643	-0.0998392	0.816082	0.282054	0.11037	0.0133339	0.953082	0.140377	0.437087
C1orf174	0.443218	1.34335e-08	-0.0827497	0.581534	-0.349311	6.53578e-06	0.0522932	0.757577	0.360469	1.62323e-06	0.0939071	0.222839	0.495512	5.35881e-10
C1orf189	-1.49885	1.02165e-12	-0.00986641	0.986286	-0.181913	0.3575	-0.119798	0.776648	-1.50872	8.66475e-13	-1.68077	2.69098e-14	-1.61865	5.12937e-14
C1orf194	-1.21235	1.54375e-07	-0.0859043	0.900997	-0.808892	0.000401709	-0.158299	0.757577	-1.29825	3.19358e-08	-2.02124	5.41853e-14	-1.37065	6.33214e-09
C1orf198	-0.210755	6.26123e-05	0.0147493	0.93023	0.0679932	0.228938	-0.053067	0.649679	-0.196005	0.000186071	-0.142761	0.00746358	-0.263822	1.0269e-06
C1orf21	-0.078748	0.334666	-0.0581442	0.777052	0.15818	0.0601	-0.032564	0.874626	-0.136892	0.0870658	0.0794324	0.363364	-0.111312	0.162306
C1orf210	0.127449	0.208318	0.0408961	0.896871	0.117257	0.287779	0.0325144	0.907027	0.168345	0.0947479	0.244706	0.0182461	0.159963	0.108736
C1orf216	0.110226	0.264045	-0.141556	0.450052	-0.102488	0.343051	-0.0408995	0.870224	-0.0313305	0.768524	0.00773784	0.9509	0.0693262	0.490434
C1orf220	-0.153391	0.510978	0.309232	0.480705	0.232182	0.351213	-0.11268	0.83793	0.155841	0.507201	0.078791	0.770309	-0.266071	0.236871
C1orf226	0.125994	0.143408	0.0928159	0.619787	0.107248	0.253626	0.0617831	0.760507	0.21881	0.010449	0.233241	0.0083369	0.187777	0.0265872
C1orf35	-0.273887	0.02335	0.0249169	0.955074	0.28034	0.0278914	0.150774	0.571794	-0.24897	0.0405425	0.00645314	0.967131	-0.123113	0.319142
C1orf43	-0.0515294	0.257155	0.0482437	0.62133	0.0941529	0.0456056	0.0512864	0.603811	-0.00328571	0.948846	0.0426234	0.387129	-0.00024303	0.996177
C1orf50	-0.072083	0.335941	0.038648	0.854927	-0.0370897	0.669819	0.00545291	0.980392	-0.033435	0.67079	-0.109173	0.160147	-0.0666301	0.3721
C1orf52	0.383384	1.21823e-08	-0.0756348	0.553789	-0.244981	0.000180806	-0.063745	0.646759	0.307749	1.95899e-06	0.138403	0.0311816	0.319639	7.68538e-07
C1orf53	-0.193311	0.197812	0.243178	0.372539	0.254539	0.108723	0.207886	0.512299	0.0498676	0.758666	0.0612283	0.729503	0.0145749	0.929652
C1orf54	0.856489	1.27565e-07	0.110921	0.777424	-0.643339	7.03939e-05	0.0404051	0.925994	0.96741	6.65254e-09	0.21315	0.189648	0.896894	3.68144e-08
C1orf56	-0.305428	0.0058695	0.124477	0.603415	0.261691	0.0251145	0.0142463	0.965279	-0.180951	0.107435	-0.0437374	0.742467	-0.291182	0.00826301
C1orf68	0.429218	0.282156	-1.16448	0.0395238	-1.47677	0.000346561	-0.397669	0.653326	-0.735259	0.0608565	-1.04755	0.0094917	0.0315491	0.941915
C1orf74	0.866586	2.35076e-06	-0.527477	0.0378238	-1.09887	3.3498e-08	0.00320259	0.994325	0.339109	0.0546262	-0.23228	0.219371	0.869789	1.98588e-06
C1orf87	-1.75037	1.98414e-13	-0.149753	0.766525	-0.896645	2.20761e-05	-0.220165	0.617521	-1.90012	1.08353e-14	-2.64701	2.60643e-20	-1.97053	1.8619e-15
C1QBP	-0.101876	0.233273	0.152743	0.299891	0.218088	0.0132465	0.12849	0.464622	0.0508667	0.569213	0.116212	0.197223	0.026614	0.771401
C1QL1	0.788263	0.00146015	0.254851	0.64703	-0.623544	0.016141	-0.1006	0.875541	1.04311	3.92928e-05	0.164718	0.560034	0.687662	0.00505031
C1QTNF1	0.741752	0.00145208	-0.549865	0.12989	-1.44063	4.12898e-08	-0.152987	0.783977	0.191888	0.429314	-0.698879	0.00363414	0.588766	0.0106036
C1QTNF12	0.420181	0.052316	0.207594	0.681628	-0.369829	0.111627	-0.07436	0.902063	0.627775	0.00384941	0.0503524	0.85096	0.345821	0.110184
C1QTNF2	-0.494009	0.0481634	0.0810393	0.921934	-0.102834	0.736796	0.0441924	0.950945	-0.41297	0.10244	-0.596843	0.021749	-0.449817	0.0710871
C1QTNF3	0.219101	0.201103	-0.0282809	0.96296	0.0977641	0.62525	-0.129819	0.742651	0.19082	0.27219	0.316865	0.0744593	0.089282	0.618931
C1QTNF4	-0.467272	0.0129462	-0.00144695	0.998583	0.358218	0.0744605	-0.225405	0.588933	-0.468719	0.0130322	-0.109054	0.617252	-0.692677	0.000264822
C1QTNF6	-0.301246	0.0120622	-0.0350192	0.929866	0.135913	0.308941	-0.0251132	0.941592	-0.336265	0.00530795	-0.165333	0.201308	-0.326359	0.00632521
C1R	3.15989	1.60116e-23	-0.21973	0.625789	-0.974357	1.06087e-05	-0.225318	0.624507	2.94016	6.42073e-22	2.18553	3.70016e-16	2.93457	4.31472e-22
C1RL	0.233755	2.34362e-06	-0.081663	0.336952	0.0462678	0.385848	-0.107337	0.200176	0.152092	0.00142982	0.280023	7.30284e-08	0.126418	0.00715317
C1RL-AS1	0.459276	0.00484213	-0.0653968	0.899514	-0.117243	0.535758	0.00733106	0.987418	0.393879	0.0159518	0.342033	0.0450504	0.466607	0.00403813
C1S	2.53301	3.36855e-17	-0.324627	0.465517	-0.832868	0.00051294	-0.287228	0.565515	2.20838	8.45669e-15	1.70014	1.027e-10	2.24578	3.05122e-15
C2	1.04244	2.04381e-14	-0.142327	0.525452	-0.640557	1.79349e-07	-0.0854924	0.737788	0.90011	3.91897e-12	0.40188	0.000443616	0.956944	3.49545e-13
C20orf194	-0.096844	0.181464	-0.123891	0.334768	-0.0963839	0.218913	-0.0804658	0.616517	-0.220735	0.00216729	-0.193228	0.0091399	-0.17731	0.0125123
C20orf197	-0.548044	0.0175457	0.417639	0.305741	0.795373	0.00110181	0.215509	0.686308	-0.130405	0.598465	0.247329	0.329431	-0.332535	0.152084
C20orf204	0.0157098	0.936834	0.290061	0.360118	0.162756	0.407264	0.17047	0.665805	0.305771	0.0802622	0.178466	0.349298	0.18618	0.291204
C20orf27	-0.533638	2.69409e-05	0.0464902	0.907191	0.531848	5.89949e-05	0.102243	0.720893	-0.487147	0.000114677	-0.00178996	0.99083	-0.431394	0.000511445
C20orf85	-1.21595	3.24356e-09	-0.0986742	0.854927	-0.703158	0.000350852	-0.119132	0.789417	-1.31462	3.83804e-10	-1.9191	1.333e-15	-1.33508	1.8651e-10
C20orf96	-0.797021	1.87505e-08	-0.042699	0.920969	-0.390812	0.00421491	-0.0955774	0.75709	-0.83972	5.16878e-09	-1.18783	1.33646e-13	-0.892598	7.44343e-10
C21orf2	-0.546672	3.98626e-06	-0.0789576	0.792239	0.115091	0.367602	-0.0393147	0.901498	-0.625629	2.58218e-07	-0.431581	0.000275535	-0.585986	9.03964e-07
C21orf58	-1.46953	6.45787e-13	-0.202754	0.569259	-0.48326	0.00689529	-0.228341	0.538035	-1.67229	6.39232e-15	-1.95279	2.37727e-17	-1.69788	2.43367e-15
C21orf62-AS1	-0.78831	7.89378e-07	0.122001	0.747125	0.514518	0.00123836	0.0977907	0.786844	-0.666309	2.00361e-05	-0.273791	0.0859834	-0.690519	9.34608e-06
C21orf91	1.51915	6.43069e-15	-0.0558243	0.91156	-0.712952	1.99114e-05	-0.0318142	0.942612	1.46332	2.83263e-14	0.806193	1.37011e-06	1.48733	1.07053e-14
C22orf15	-1.20343	8.18401e-10	-0.160625	0.698709	-0.553384	0.00260438	-0.150458	0.712734	-1.36406	1.98798e-11	-1.75682	3.9946e-15	-1.35389	1.8505e-11
C22orf23	-0.950971	8.35374e-08	-0.0798006	0.873945	-0.850158	2.45003e-06	-0.199862	0.583766	-1.03077	1.21466e-08	-1.80113	1.64064e-16	-1.15083	4.60954e-10
C22orf24	0.165884	0.485778	0.0849637	0.907839	-0.00194474	0.995318	0.312408	0.523967	0.250848	0.28355	0.163939	0.525236	0.478292	0.0339044
C22orf39	-0.301115	2.23221e-05	0.0262201	0.905907	0.149888	0.0396747	-0.03606	0.832115	-0.274894	9.71886e-05	-0.151227	0.0357956	-0.337175	2.62997e-06
C22orf46	0.473101	7.34938e-09	0.149611	0.233794	-0.0915724	0.265072	0.0807247	0.629932	0.622712	2.027e-12	0.381529	1.84054e-06	0.553826	6.73802e-11
C2CD2	0.0809283	0.238572	0.098154	0.453262	0.296785	3.96664e-05	-0.0316814	0.851881	0.179082	0.00793493	0.377713	2.58336e-07	0.0492469	0.481681
C2CD2L	-0.761188	8.63732e-14	0.0612744	0.776869	-0.050471	0.608219	-0.13612	0.428678	-0.699913	1.7859e-12	-0.811659	1.31863e-14	-0.897308	1.17122e-16
C2CD3	-0.141515	0.120812	-0.158552	0.327024	-0.278876	0.00335083	-0.153338	0.404207	-0.300067	0.00102588	-0.420391	1.19626e-05	-0.294853	0.00112734
C2CD4A	0.903315	7.16503e-05	-0.0259932	0.97496	-0.293309	0.230203	-0.293152	0.546816	0.877322	0.00011501	0.610006	0.00822216	0.610164	0.00584573
C2CD4B	0.803518	0.000148331	-0.169108	0.745124	-0.535141	0.0144781	-0.176388	0.715331	0.634409	0.0024676	0.268376	0.233127	0.62713	0.00251609
C2CD4C	0.194692	0.283618	-0.0682529	0.903926	-0.0903947	0.669819	0.325281	0.35102	0.126439	0.499786	0.104297	0.611392	0.519973	0.00320995
C2CD4D	-0.240148	0.159008	0.252412	0.43594	0.31949	0.0754495	0.22867	0.532005	0.0122641	0.949594	0.0793418	0.689956	-0.0114785	0.951224
C2CD5	0.239825	0.0326483	-0.038845	0.914948	-0.11479	0.36309	-0.128779	0.606552	0.20098	0.076282	0.125035	0.309175	0.111046	0.334417
C2CD6	-0.418391	0.0549893	0.337183	0.413415	0.325452	0.168765	-0.0383656	0.950986	-0.0812078	0.732943	-0.0929392	0.720491	-0.456757	0.0347958
C2orf15	-0.209054	0.046207	0.0993582	0.686531	0.180143	0.109598	-0.0485119	0.854863	-0.109696	0.311025	-0.028911	0.823113	-0.257566	0.01334
C2orf27A	0.64684	6.24454e-07	-0.29387	0.124823	-0.88226	9.08454e-10	-0.0879452	0.763048	0.35297	0.00415644	-0.23542	0.0680141	0.558895	9.80033e-06
C2orf40	-1.6207	2.73617e-08	0.0314686	0.97496	-0.543692	0.0563917	-0.318618	0.59304	-1.58923	4.74043e-08	-2.16439	1.01715e-11	-1.93932	1.63862e-10
C2orf42	0.109691	0.115031	-0.0410072	0.833364	-0.174271	0.016428	0.0528641	0.744829	0.0686842	0.337579	-0.0645797	0.400195	0.162555	0.0177958
C2orf49	0.00288577	0.964642	-0.104433	0.287854	-0.10835	0.071119	-0.0811744	0.499518	-0.101547	0.0740639	-0.105464	0.075662	-0.0782886	0.167609
C2orf50	-0.786062	1.11889e-05	-0.0388125	0.950465	-0.542849	0.00280765	-0.0169028	0.973844	-0.824874	4.88281e-06	-1.32891	4.79364e-11	-0.802964	6.96318e-06
C2orf54	0.168529	0.197853	-0.312991	0.117018	-0.568497	3.94603e-05	0.195647	0.469704	-0.144462	0.27654	-0.399967	0.00275205	0.364176	0.00449894
C2orf66	1.21413	1.03493e-07	-0.133256	0.81924	-0.669658	0.002716	-0.0467746	0.938363	1.08087	1.40272e-06	0.54447	0.0135774	1.16735	2.26591e-07
C2orf68	-0.267672	0.000311872	-0.0672703	0.698919	0.0798911	0.328704	-0.0779449	0.638257	-0.334943	1.07835e-05	-0.187781	0.0135859	-0.345617	5.26568e-06
C2orf69	0.26574	0.113152	0.0519844	0.924738	0.0217562	0.922047	-0.104096	0.795801	0.317724	0.0580322	0.287496	0.10291	0.161643	0.343547
C2orf70	-0.205143	0.244482	-0.159127	0.698042	-0.737817	6.52593e-05	-0.0558887	0.908168	-0.36427	0.0355536	-0.94296	4.76837e-07	-0.261032	0.131392
C2orf72	0.23776	0.393307	0.114272	0.890762	0.159741	0.615174	-0.153236	0.816451	0.352032	0.199301	0.397501	0.166281	0.0845244	0.773337
C2orf73	-1.375	1.28821e-09	0.0693139	0.916012	-0.527402	0.0134095	-0.180669	0.701321	-1.30569	5.72199e-09	-1.9024	5.26024e-14	-1.55567	2.59247e-11
C2orf74	-0.402156	0.00541049	0.250384	0.334972	0.485935	0.00143045	0.192572	0.541743	-0.151772	0.30975	0.0837788	0.617127	-0.209584	0.148908
C2orf76	-0.863597	1.45618e-11	0.071119	0.811093	0.202493	0.0845701	-0.0246342	0.937821	-0.792478	2.23998e-10	-0.661104	4.91046e-08	-0.888231	4.57691e-12
C2orf88	0.481487	0.0885041	0.2059	0.777919	-0.194131	0.553954	-0.236329	0.717094	0.687387	0.0147773	0.287355	0.353727	0.245158	0.397245
C2orf92	-0.826822	1.98993e-05	0.301308	0.390457	0.159427	0.458036	0.00261372	0.995992	-0.525514	0.00534096	-0.667395	0.000645953	-0.824209	1.90897e-05
C3	0.967316	7.11753e-16	-0.168441	0.306472	-0.389531	9.36403e-05	-0.20806	0.214653	0.798875	9.07924e-13	0.577785	2.40421e-08	0.759256	3.72642e-12
C3AR1	2.8879	1.31425e-15	-0.170979	0.828396	-1.86339	9.69611e-09	0.12427	0.863306	2.71692	1.50087e-14	1.02451	0.000512156	3.01217	1.84725e-16
C3orf14	0.238137	0.0734858	0.184173	0.482696	0.168713	0.247895	0.224798	0.404207	0.422311	0.00159037	0.406851	0.00309131	0.462935	0.000512402
C3orf18	-0.826871	1.6784e-08	0.0237726	0.962166	0.116823	0.44576	0.12647	0.683762	-0.803098	3.7043e-08	-0.710048	9.62062e-07	-0.700401	7.13998e-07
C3orf20	0.172748	0.4835	0.160343	0.79558	-0.249612	0.343046	-0.115454	0.842891	0.333091	0.164494	-0.076864	0.790149	0.0572947	0.824833
C3orf33	0.199904	0.10944	0.132399	0.629941	0.340448	0.00895896	0.042026	0.903315	0.332303	0.00755054	0.540352	3.64155e-05	0.24193	0.0499702
C3orf35	0.273477	0.20855	-0.156172	0.778563	0.0158523	0.956561	-0.126142	0.80927	0.117306	0.609192	0.28933	0.209256	0.147335	0.509875
C3orf38	1.07558	1.2323e-14	-0.155145	0.482645	-0.695422	3.94398e-08	0.00455118	0.987793	0.92044	3.32655e-12	0.380163	0.00104974	1.08014	7.79408e-15
C3orf52	0.628946	1.6579e-07	-0.41361	0.00743043	-0.791577	1.59808e-09	-0.212694	0.331007	0.215336	0.0568453	-0.162631	0.176725	0.416252	0.000239731
C3orf58	-0.159048	0.335227	0.0747468	0.879725	0.219202	0.211256	-0.167466	0.643431	-0.0843014	0.624417	0.0601539	0.755636	-0.326515	0.0403704
C3orf62	0.299902	2.0918e-05	-0.0398777	0.838029	-0.0836479	0.267853	-0.0203201	0.91659	0.260025	0.000190123	0.216254	0.00229589	0.279582	5.91893e-05
C3orf67	-0.557874	3.11278e-08	0.0195952	0.953471	-0.00848737	0.947269	0.0813535	0.70698	-0.538278	7.92141e-08	-0.566361	3.52995e-08	-0.47652	1.0101e-06
C3orf70	-0.257663	0.206452	0.346488	0.337023	0.291599	0.182011	0.088764	0.862652	0.0888245	0.683439	0.0339362	0.893584	-0.168899	0.414693
C4A	2.20813	7.17606e-14	-0.405048	0.356106	-1.42384	1.29783e-07	-0.246239	0.652693	1.80308	7.07595e-11	0.784285	0.00168057	1.96189	3.46511e-12
C4B	2.40303	9.89837e-16	-0.267866	0.588816	-1.4848	2.39676e-08	-0.164254	0.767199	2.13517	9.25579e-14	0.918236	0.000174115	2.23878	1.13092e-14
C4BPA	0.0761724	0.65493	0.364689	0.147996	0.629942	0.000191511	0.118725	0.753015	0.440861	0.00566839	0.706114	2.60067e-05	0.194898	0.2252
C4BPB	0.439315	0.0651783	0.273428	0.586797	0.254355	0.338657	-0.0581077	0.932027	0.712742	0.00286902	0.693669	0.00486026	0.381207	0.109166
C4orf19	0.698325	2.15199e-13	-0.023904	0.926662	-0.343133	4.58028e-05	-0.00548831	0.981906	0.674421	7.93664e-13	0.355192	1.90537e-05	0.692837	2.23848e-13
C4orf3	0.292515	4.51136e-05	-0.0813616	0.580039	-0.35837	2.74483e-06	0.0459836	0.783977	0.211153	0.0026894	-0.0658553	0.396566	0.338499	3.21586e-06
C4orf33	1.32116	4.9007e-21	-0.0614964	0.815057	-0.835476	4.00566e-12	0.0822253	0.714796	1.25966	5.10487e-20	0.485683	2.60252e-06	1.40338	2.29935e-22
C4orf36	0.13136	0.0243981	-0.135727	0.141251	-0.0904167	0.15328	-0.0424867	0.759747	-0.00436666	0.948284	0.0409434	0.539907	0.0888734	0.129277
C4orf46	-0.136198	0.166548	0.0445985	0.881774	0.211403	0.0397461	0.0585154	0.805654	-0.0915993	0.364862	0.0752048	0.493904	-0.0776824	0.441212
C4orf47	-1.14721	2.62741e-09	0.0293802	0.962676	0.0784331	0.709531	-0.00152278	0.997412	-1.11783	5.73868e-09	-1.06878	2.83915e-08	-1.14874	2.14501e-09
C4orf48	-0.23725	0.0882067	-0.0347055	0.942992	-0.0968951	0.547871	0.0198285	0.960547	-0.271956	0.0508537	-0.334145	0.0204565	-0.217422	0.116852
C4orf54	0.191602	0.538934	-0.678342	0.148802	-1.25069	7.7666e-05	-0.312522	0.640238	-0.48674	0.104267	-1.05909	0.000587195	-0.12092	0.70447
C5	-0.29462	0.0434147	0.160951	0.613535	-0.0112016	0.954861	0.0539363	0.892577	-0.133669	0.378299	-0.305822	0.0451605	-0.240684	0.0989214
C5AR1	-1.29535	2.44432e-14	0.0231211	0.962676	0.00941813	0.959787	-0.140223	0.652693	-1.27223	5.14594e-14	-1.28593	5.06882e-14	-1.43557	3.489e-16
C5AR2	-0.445424	0.017044	0.312464	0.36125	0.727349	0.000248862	-0.292139	0.454844	-0.13296	0.501543	0.281925	0.158469	-0.737564	0.00010081
C5orf15	0.108026	0.32131	-0.119155	0.600993	-0.447127	7.83412e-05	-0.110511	0.643863	-0.011129	0.927559	-0.339101	0.00201309	-0.00248512	0.983839
C5orf17	0.0821695	0.737915	0.155231	0.792971	0.177254	0.491903	0.434735	0.317283	0.237401	0.305917	0.259423	0.289523	0.516905	0.0204035
C5orf22	0.508974	6.27868e-07	-0.0399059	0.895643	-0.338469	0.000892477	-0.0412352	0.869061	0.469069	3.43951e-06	0.170506	0.0946465	0.467739	3.14537e-06
C5orf24	-0.173494	0.274145	0.0611457	0.901709	0.122821	0.490257	-0.193917	0.57055	-0.112349	0.492551	-0.0506737	0.790149	-0.367412	0.0169535
C5orf30	-0.158854	0.146387	-0.0356035	0.920969	0.396888	0.000530121	-0.164427	0.469704	-0.194458	0.0750432	0.238034	0.0353888	-0.323282	0.00273607
C5orf34	0.274032	0.0491025	0.0824772	0.833575	0.110372	0.489839	-0.0338975	0.932212	0.35651	0.010586	0.384405	0.00771416	0.240135	0.0840566
C5orf38	-0.535844	4.13266e-06	-0.0369064	0.920572	0.379777	0.00124361	-0.0134766	0.967251	-0.572751	1.17076e-06	-0.156067	0.193139	-0.549321	2.31868e-06
C5orf46	-0.93789	1.50171e-05	-0.45128	0.189983	-0.0554806	0.834345	0.155427	0.75485	-1.38917	2.59702e-09	-0.993371	8.45796e-06	-0.782463	0.000220134
C5orf49	-1.03379	6.92874e-08	-0.0987326	0.846737	-0.448045	0.0165803	-0.0795994	0.860249	-1.13253	7.52626e-09	-1.48184	3.40268e-12	-1.11339	9.28267e-09
C5orf51	0.254714	0.0413394	-0.0778501	0.821069	-0.261405	0.0481353	-0.184528	0.489506	0.176864	0.164726	-0.00669096	0.967057	0.0701866	0.59572
C5orf56	1.94037	4.03741e-21	-0.230807	0.376326	-1.17488	1.29008e-11	0.0579017	0.874626	1.70956	1.34925e-18	0.765494	5.55067e-07	1.99827	8.09456e-22
C5orf63	-0.397451	0.000462516	0.105722	0.689717	0.381258	0.00127294	0.0747918	0.78237	-0.291729	0.00954861	-0.0161932	0.908569	-0.322659	0.00389495
C5orf66	0.202566	0.0935139	-0.179362	0.438149	-0.0182628	0.909404	-0.157772	0.548646	0.0232037	0.865405	0.184303	0.151146	0.044794	0.730537
C5orf66-AS1	0.00583675	0.980684	-0.405605	0.22415	0.148541	0.518101	-0.222901	0.617558	-0.399768	0.0454513	0.154378	0.491835	-0.217064	0.283366
C6	-2.3426	3.14381e-14	-0.348887	0.478939	-1.26631	3.33947e-06	-0.609037	0.149412	-2.69149	1.66666e-16	-3.60891	1.34125e-21	-2.95164	2.3279e-18
C6orf106	0.251357	8.82957e-05	-0.0590673	0.690552	-0.00413401	0.961677	-0.0354845	0.818064	0.19229	0.00236373	0.247223	0.00016934	0.215873	0.000617952
C6orf118	-1.00181	1.02825e-07	-0.155091	0.713986	-0.726504	0.000103253	-0.182847	0.64414	-1.1569	2.83915e-09	-1.72831	8.14814e-15	-1.18466	1.14983e-09
C6orf120	0.355228	0.000468847	-0.0770815	0.765509	-0.22032	0.0379321	-0.0920059	0.692126	0.278146	0.00578521	0.134908	0.212826	0.263222	0.0083653
C6orf132	0.141519	0.0361652	-0.188233	0.0595929	-0.313552	1.71309e-05	0.111233	0.423548	-0.0467139	0.514126	-0.172033	0.0142463	0.252752	0.000212726
C6orf136	-0.0771588	0.325396	0.165396	0.183489	0.27313	0.000695902	0.198284	0.114824	0.0882377	0.26048	0.195971	0.0132762	0.121125	0.112512
C6orf141	0.481669	0.0136487	-0.32289	0.370359	-0.596854	0.00367565	-0.0731797	0.89046	0.158779	0.439029	-0.115185	0.611392	0.408489	0.035683
C6orf15	0.113246	0.756824	0.409265	0.556614	0.722694	0.040657	1.18063	0.0148958	0.522511	0.123264	0.83594	0.016017	1.29388	0.000130433
C6orf163	0.245657	0.204634	-0.354059	0.286128	-0.524142	0.0088235	-0.633644	0.025502	-0.108402	0.595475	-0.278485	0.17244	-0.387988	0.0406611
C6orf203	0.00332782	0.967641	0.0730489	0.649451	0.0851501	0.277094	0.0113881	0.9554	0.0763767	0.296831	0.0884779	0.249776	0.0147159	0.851253
C6orf222	-0.0754065	0.733679	-0.35266	0.33301	-0.638852	0.00272349	-0.666836	0.0277148	-0.428066	0.0355066	-0.714259	0.000707549	-0.742243	0.000281123
C6orf223	0.31546	0.285089	1.3071	0.000623734	0.19099	0.570226	1.09949	0.00698112	1.62256	1.53166e-07	0.50645	0.0960986	1.41495	2.40219e-06
C6orf226	-0.315442	0.0214975	0.0497476	0.911096	0.281893	0.0531071	0.051344	0.890685	-0.265695	0.0547181	-0.0335496	0.843662	-0.264098	0.0535839
C6orf47	0.581243	1.38747e-13	-0.0755871	0.576921	-0.278814	5.52833e-05	0.0193519	0.91563	0.505655	1.7196e-11	0.302428	1.01763e-05	0.600595	3.24364e-14
C6orf47-AS1	0.423137	0.0248652	-0.101617	0.851787	-0.125026	0.571141	0.147529	0.737538	0.321519	0.0921485	0.298111	0.138851	0.570666	0.00244128
C6orf48	-0.375907	0.000226511	0.0213978	0.953471	0.187929	0.079729	0.0612134	0.801833	-0.354509	0.000499914	-0.187977	0.0756677	-0.314693	0.00170842
C6orf52	-1.14377	1.27453e-08	0.00126328	0.99873	-0.186072	0.367928	0.0744477	0.87664	-1.1425	1.39846e-08	-1.32984	3.11377e-10	-1.06932	5.93237e-08
C6orf58	0.0429543	0.861216	0.240796	0.611157	0.00131824	0.996817	-0.0714448	0.906301	0.283751	0.201454	0.0442726	0.871189	-0.0284904	0.906097
C6orf62	1.26625	9.69534e-16	-0.0874192	0.786965	-0.517882	8.37499e-05	-0.0908169	0.756308	1.17883	1.6504e-14	0.748369	3.8176e-08	1.17543	1.27483e-14
C6orf89	0.136412	0.000657576	-0.0202993	0.862226	0.0321482	0.48003	0.0248358	0.795562	0.116112	0.00358243	0.16856	5.43372e-05	0.161248	6.49259e-05
C6orf99	-0.457892	0.00576427	0.273556	0.371621	0.240135	0.183981	0.203953	0.578646	-0.184336	0.281288	-0.217758	0.224017	-0.25394	0.126848
C7orf26	-0.0935665	0.211068	0.0219226	0.928219	0.0215448	0.815691	0.0479429	0.785867	-0.0716439	0.347724	-0.0720217	0.375842	-0.0456236	0.55575
C7orf31	0.351888	0.000345242	-0.159215	0.37435	-0.329944	0.00126645	-0.11421	0.595597	0.192673	0.0484964	0.021944	0.855595	0.237678	0.0137321
C7orf43	0.448831	2.02335e-08	-0.0873744	0.569692	-0.297571	0.000143178	-0.0406953	0.822491	0.361457	2.70558e-06	0.15126	0.0492899	0.408136	1.75183e-07
C7orf50	-0.308372	0.00218869	0.153032	0.423778	0.166808	0.122732	0.146891	0.494852	-0.155339	0.127647	-0.141564	0.18941	-0.161481	0.108019
C7orf57	-1.11814	6.76192e-11	-0.000892003	0.998961	-0.168372	0.310512	-0.0705845	0.851095	-1.11903	7.06521e-11	-1.28651	1.08489e-12	-1.18872	7.59531e-12
C8G	0.0112938	0.958142	0.010864	0.985834	0.00071898	0.997922	0.047556	0.929026	0.0221578	0.918191	0.0120128	0.960653	0.0588498	0.773111
C8orf31	1.42242	9.59727e-14	-0.00825657	0.987165	0.0125788	0.952659	-0.136704	0.707132	1.41416	1.29119e-13	1.435	1.10696e-13	1.28571	2.55769e-12
C8orf33	-0.323985	1.75743e-10	0.0973235	0.17992	0.0708652	0.14202	0.0981136	0.224421	-0.226661	1.45792e-06	-0.253119	2.06497e-07	-0.225871	1.33878e-06
C8orf34	-1.23274	1.11853e-09	-0.502119	0.0607813	-0.480127	0.0115675	-0.281541	0.457908	-1.73486	1.58663e-14	-1.71286	3.74568e-14	-1.51428	1.4593e-12
C8orf34-AS1	-1.35647	2.08282e-11	-0.133889	0.765509	0.123741	0.542047	-0.350087	0.290883	-1.49035	9.90995e-13	-1.23272	6.35344e-10	-1.70655	5.11541e-15
C8orf37	-0.749642	1.68049e-08	0.0177617	0.970008	-0.0177611	0.912856	-0.238459	0.309164	-0.731881	3.26232e-08	-0.767404	1.51731e-08	-0.988101	4.06174e-12
C8orf44	-0.280538	0.00646712	0.213491	0.213322	0.127647	0.261739	-0.0239137	0.935449	-0.0670469	0.541003	-0.152891	0.165624	-0.304451	0.00303883
C8orf48	-0.0193455	0.869611	0.00603022	0.985834	-0.325157	0.00296845	0.0330879	0.910347	-0.0133153	0.911751	-0.344502	0.00143779	0.0137424	0.905482
C8orf58	0.106438	0.27789	-0.121603	0.536035	-0.0676419	0.543642	0.11203	0.596533	-0.0151652	0.890806	0.0387964	0.73562	0.218468	0.021604
C8orf59	-0.276432	0.0019408	0.125148	0.475461	0.270938	0.00370911	0.00520029	0.984497	-0.151285	0.0922187	-0.00549414	0.961626	-0.271232	0.00221908
C8orf76	0.00996166	0.91913	-0.0321228	0.908202	-0.159573	0.0827321	-0.0183438	0.940576	-0.0221611	0.817306	-0.149611	0.100354	-0.0083821	0.930561
C8orf82	-0.0823019	0.409244	0.0180288	0.960189	0.27789	0.00580251	0.0517869	0.825933	-0.064273	0.528078	0.195588	0.0517522	-0.030515	0.77112
C8orf88	-0.354199	0.0639732	0.314634	0.371266	0.543366	0.00669743	0.14257	0.753015	-0.0395656	0.854874	0.189166	0.369548	-0.21163	0.27542
C8orf89	-0.669852	0.00144725	-0.0108292	0.987412	0.0181545	0.949687	0.159417	0.746911	-0.680681	0.0012708	-0.651697	0.00267552	-0.510435	0.0140653
C9orf116	-1.36813	1.21457e-10	-0.050534	0.935828	-0.480908	0.014024	-0.0713892	0.886172	-1.41866	4.25541e-11	-1.84904	6.32065e-15	-1.43952	1.97366e-11
C9orf135	-1.24075	3.26914e-09	-0.0236353	0.97496	-0.461726	0.0205064	-0.0198812	0.971432	-1.26439	2.08866e-09	-1.70248	2.41877e-13	-1.26063	1.78381e-09
C9orf152	0.202775	0.061006	-0.0106016	0.979386	0.465887	5.70288e-05	0.105174	0.669997	0.192174	0.0778796	0.668662	2.40773e-08	0.30795	0.00418497
C9orf16	0.113158	0.370238	0.090865	0.772316	0.131569	0.334311	0.160084	0.548646	0.204023	0.098159	0.244727	0.0558388	0.273242	0.024098
C9orf163	-0.429809	0.0305537	0.378383	0.269361	0.503098	0.0161612	0.0547597	0.923237	-0.0514255	0.816472	0.0732897	0.760869	-0.375049	0.0584151
C9orf24	-1.63326	1.76587e-11	-0.114606	0.848981	-0.536112	0.0147128	-0.258975	0.574021	-1.74786	2.03628e-12	-2.16937	1.16573e-15	-1.89223	9.12217e-14
C9orf3	-0.00204811	0.983224	-0.109474	0.498964	-0.0449082	0.641635	-0.0674641	0.719094	-0.111522	0.176793	-0.0469563	0.616489	-0.0695123	0.404399
C9orf40	-0.169641	0.101689	0.166522	0.384539	0.374923	0.000577595	-0.0523595	0.837735	-0.00311877	0.97859	0.205282	0.0576545	-0.222	0.0301057
C9orf43	-0.803226	1.83053e-08	0.16773	0.531501	0.0703579	0.652749	-0.211697	0.433471	-0.635496	3.51424e-06	-0.732868	2.77486e-07	-1.01492	1.80015e-11
C9orf64	-0.00693199	0.942714	0.0658098	0.756691	-0.120483	0.187259	0.0460854	0.82316	0.0588779	0.50692	-0.127415	0.15489	0.0391534	0.663203
C9orf72	-0.690758	5.15144e-08	0.0528269	0.884255	-0.0624977	0.65595	-0.179013	0.466536	-0.637931	3.45481e-07	-0.753256	9.37926e-09	-0.869772	7.57147e-11
C9orf78	-0.0327499	0.669636	0.0292608	0.896871	0.0421217	0.617708	0.07222	0.655771	-0.00348909	0.966196	0.00937181	0.916733	0.0394701	0.601586
C9orf84	1.95307	1.94728e-17	0.0131844	0.983149	-0.862327	4.38566e-06	-0.0325738	0.947719	1.96625	1.7373e-17	1.09074	1.3648e-08	1.92049	2.83033e-17
C9orf85	0.740879	2.08374e-13	0.0226182	0.935828	-0.281735	0.00130905	0.0265142	0.909709	0.763497	7.69761e-14	0.459144	3.80426e-07	0.767393	4.54909e-14
CA10	0.524214	0.00745573	0.124861	0.815245	-0.943946	8.89772e-06	0.0370549	0.947719	0.649074	0.00104843	-0.419732	0.0407213	0.561269	0.00404054
CA11	-1.27787	7.05978e-10	-0.0545802	0.928557	1.04429	3.5942e-07	0.0863556	0.853501	-1.33245	2.22155e-10	-0.233572	0.242825	-1.19151	4.15309e-09
CA12	0.183474	0.465403	0.338353	0.474798	0.414111	0.108254	0.236657	0.665588	0.521827	0.0302984	0.597585	0.0166394	0.42013	0.0796214
CA14	0.146833	0.465403	0.0221797	0.97496	-0.0473718	0.846345	0.0912908	0.849778	0.169012	0.399152	0.0994608	0.659596	0.238123	0.22036
CA2	-0.0453441	0.849259	-0.170524	0.74746	0.0289437	0.918639	0.0734906	0.901498	-0.215868	0.325345	-0.0164004	0.952404	0.0281465	0.904944
CA3	0.798412	7.79208e-06	0.190945	0.610293	-0.122244	0.541185	-0.0239664	0.961859	0.989357	9.56542e-08	0.676169	0.000172893	0.774446	1.21941e-05
CA5B	-0.642942	5.75561e-07	-0.0484052	0.900947	0.375036	0.00329537	-0.00171245	0.995992	-0.691347	1.20818e-07	-0.267906	0.0347689	-0.644654	4.87391e-07
CA5BP1	0.386752	2.99347e-06	-0.11375	0.463736	-0.169613	0.0429669	-0.0527137	0.782479	0.273002	0.000661266	0.217139	0.00819995	0.334038	3.61954e-05
CA8	-0.418038	0.00380315	-0.0561478	0.903444	0.126593	0.44155	-0.22634	0.454426	-0.474186	0.00113886	-0.291445	0.0541997	-0.644378	1.4005e-05
CA9	0.517266	0.0303587	0.213783	0.711511	0.231679	0.39125	0.0184086	0.97998	0.73105	0.00239257	0.748946	0.00252562	0.535675	0.0241098
CAAP1	0.0069124	0.964125	0.096849	0.780139	0.0911726	0.557507	-0.12736	0.677016	0.103761	0.458944	0.098085	0.517429	-0.120447	0.379634
CAB39	0.316106	0.00107016	-0.0416711	0.889036	-0.331116	0.00107607	-0.052934	0.823134	0.274435	0.00442333	-0.0150098	0.901579	0.263172	0.00585191
CAB39L	-0.316862	0.000516871	-0.00907923	0.979157	0.286179	0.00258251	0.057792	0.790119	-0.325941	0.000378274	-0.0306824	0.781304	-0.25907	0.00396668
CABCOCO1	-1.6697	4.40411e-14	-0.0217815	0.97496	-0.503059	0.00761814	-0.195315	0.628166	-1.69148	2.96327e-14	-2.17276	2.66852e-18	-1.86501	4.77e-16
CABIN1	-0.203473	0.00412858	-0.109556	0.414805	-0.28686	0.000146384	-0.115568	0.428678	-0.313029	1.96722e-05	-0.490332	1.18066e-09	-0.319041	1.22591e-05
CABLES1	-0.442681	5.46595e-07	-0.0858149	0.650116	0.256998	0.00336113	-0.195201	0.178441	-0.528496	8.54599e-09	-0.185683	0.033118	-0.637882	2.79057e-11
CABLES2	0.173137	0.0253536	0.0309296	0.900768	0.0704512	0.423889	0.0194482	0.93018	0.204067	0.00868681	0.243588	0.00245481	0.192585	0.0124152
CABYR	-0.780487	1.49198e-08	0.316349	0.0999921	1.48181	1.2873e-16	0.128297	0.654797	-0.464139	0.000296159	0.701319	3.26836e-07	-0.65219	8.63791e-07
CACFD1	0.127396	0.0953725	0.0805966	0.633566	0.114232	0.166211	0.00548639	0.981312	0.207993	0.00637222	0.241628	0.00217436	0.132882	0.0798997
CACHD1	-0.786101	7.84942e-10	-0.071449	0.81924	0.00254564	0.987344	-0.27011	0.16871	-0.85755	6.32739e-11	-0.783555	1.39743e-09	-1.05621	3.90711e-14
CACNA1A	1.96314	9.9518e-13	-0.392857	0.346074	-1.28833	4.59908e-07	0.254919	0.622736	1.57028	1.14939e-09	0.674806	0.00470643	2.21805	9.23182e-15
CACNA1D	-1.19797	4.04118e-10	-0.111259	0.807512	1.00282	1.36346e-07	-0.162494	0.676218	-1.30923	2.93138e-11	-0.195159	0.292644	-1.36047	6.19876e-12
CACNA1E	0.0984201	0.700162	-0.319543	0.496741	-0.337336	0.188855	-0.266669	0.613021	-0.221123	0.366349	-0.238916	0.357206	-0.168249	0.492967
CACNA1I	5.27049	6.89497e-20	0.0855191	0.95369	-2.63651	1.5572e-08	0.453767	0.620636	5.35601	4.06416e-20	2.63398	8.05919e-09	5.72426	1.27677e-21
CACNA2D1	0.050179	0.843734	-0.215145	0.684476	-0.314939	0.202354	-0.251839	0.620293	-0.164966	0.489485	-0.26476	0.282797	-0.20166	0.385803
CACNA2D2	-0.243132	0.274145	-0.257441	0.571319	0.202379	0.411251	-0.229837	0.639855	-0.500573	0.0215405	-0.0407528	0.881852	-0.472969	0.0283883
CACNA2D3	-1.04946	1.03391e-06	0.486636	0.126629	0.724235	0.000766408	0.464926	0.19736	-0.562828	0.00592341	-0.325229	0.134296	-0.584537	0.00397052
CACNA2D4	-0.0603423	0.712178	0.124984	0.735812	0.17738	0.287024	-0.0182068	0.967192	0.0646421	0.692944	0.117037	0.491393	-0.0785491	0.62385
CACNB1	0.408347	0.000309839	0.184598	0.36966	0.0636967	0.631928	0.234943	0.257517	0.592945	5.8084e-07	0.472044	5.91425e-05	0.64329	7.62957e-08
CACNB3	-0.427236	1.24721e-06	-0.176041	0.205194	-0.128854	0.155837	-0.117667	0.513223	-0.603277	2.32369e-10	-0.55609	3.64743e-09	-0.544903	3.30628e-09
CACNB4	0.0844474	0.71648	-0.109788	0.861713	-0.412252	0.0702478	-0.326772	0.465619	-0.0253409	0.918204	-0.327804	0.151183	-0.242324	0.264413
CACNG1	-0.793535	0.00583669	0.185314	0.813246	-0.00537004	0.989141	0.0940275	0.907027	-0.608221	0.0354844	-0.798905	0.00746628	-0.699508	0.0144663
CACNG4	-1.88441	2.54611e-22	-0.01292	0.979157	0.404811	0.00285758	-0.301949	0.17892	-1.89733	2.33371e-22	-1.4796	2.45918e-17	-2.18636	1.65952e-25
CACNG6	-0.477962	0.0456811	-0.256154	0.627409	-1.52262	2.23373e-08	-0.343785	0.499773	-0.734116	0.00229084	-2.00058	2.91366e-12	-0.821747	0.000615559
CACNG8	1.40051	4.93483e-08	-0.0961749	0.898686	-0.682355	0.00624266	0.23838	0.658458	1.30434	2.75876e-07	0.718159	0.0035432	1.63889	6.46446e-10
CACTIN	0.0828267	0.141762	-0.0175124	0.924508	-0.0850173	0.160525	-0.071916	0.555618	0.0653143	0.255142	-0.00219059	0.976093	0.0109107	0.859808
CACTIN-AS1	0.0392358	0.8795	-0.108217	0.8778	0.115585	0.673405	0.0229037	0.973589	-0.0689808	0.785259	0.154821	0.555429	0.0621394	0.805192
CACUL1	-0.208519	0.00325714	0.00719289	0.979102	0.127742	0.0916776	-0.0960453	0.532005	-0.201326	0.00460862	-0.0807769	0.296087	-0.304564	2.60802e-05
CACYBP	-0.614426	2.09028e-12	0.0613595	0.735409	0.413608	4.24963e-07	-0.0194724	0.9266	-0.553066	6.75197e-11	-0.200818	0.00859445	-0.633898	5.58291e-13
CAD	-0.543773	3.62903e-06	0.259337	0.145114	0.339509	0.00405817	0.0275737	0.931993	-0.284437	0.0116173	-0.204264	0.0852169	-0.5162	8.64502e-06
CADM1	0.225661	0.0324323	-0.450827	0.00132675	-0.647745	5.60071e-08	-0.230602	0.228132	-0.225166	0.0337027	-0.422083	0.000136302	-0.00494125	0.96722
CADM2	0.57888	0.0134739	-0.0107397	0.989251	-0.0718626	0.806601	-0.0894022	0.887825	0.568141	0.0157289	0.507018	0.0388387	0.489478	0.0358863
CADM4	-0.126336	0.0985898	-0.00550904	0.983969	0.285766	0.000389654	-0.0295962	0.883353	-0.131845	0.086102	0.15943	0.0452371	-0.155932	0.0393073
CADPS2	0.402932	6.70777e-05	0.0205725	0.954104	0.0338924	0.781096	-0.0672387	0.776648	0.423505	3.22632e-05	0.436825	2.88369e-05	0.335694	0.000708555
CAGE1	-0.214294	0.379089	0.0886212	0.906738	0.280169	0.281326	0.388498	0.42171	-0.125673	0.619065	0.0658746	0.82043	0.174204	0.476229
CAHM	-0.0276171	0.915313	-0.260732	0.590679	0.0329048	0.913739	-0.181547	0.731136	-0.288349	0.216515	0.0052877	0.986601	-0.209164	0.371815
CALB1	-0.147506	0.620116	-0.0783103	0.932808	0.927545	0.00159803	0.564669	0.284477	-0.225816	0.440367	0.78004	0.00700259	0.417163	0.136027
CALB2	0.614592	0.00173363	-0.52326	0.0731412	-0.930024	1.0962e-05	-0.281698	0.499392	0.0913315	0.665771	-0.315432	0.129574	0.332894	0.0881696
CALCA	0.570411	0.0146138	-0.0645606	0.934526	-0.00242541	0.994657	-0.063409	0.924604	0.505851	0.0312234	0.567986	0.019695	0.507002	0.0291773
CALCOCO1	-0.1271	0.13014	-0.0460291	0.847268	0.150507	0.0910724	-0.0537736	0.787436	-0.173129	0.0384331	0.023407	0.819847	-0.180874	0.0287477
CALCOCO2	1.09545	3.87821e-24	-0.0970325	0.473932	-0.512634	3.36997e-10	0.152246	0.219045	0.998421	4.00615e-22	0.58282	1.87593e-12	1.2477	4.71595e-27
CALCRL	0.907458	1.05339e-06	-0.0731094	0.895069	-0.543962	0.00333825	0.0508267	0.919342	0.834348	5.76368e-06	0.363496	0.049181	0.958285	2.92512e-07
CALD1	0.412663	0.0211668	-0.641909	0.00949092	-1.29406	8.4051e-10	-0.30426	0.403751	-0.229246	0.211289	-0.881398	4.17105e-06	0.108403	0.566133
CALHM2	0.262983	0.128444	0.0327052	0.959662	-0.316376	0.0843077	0.193483	0.615294	0.295688	0.0878514	-0.0533934	0.800276	0.456465	0.00741171
CALHM5	0.942931	0.000266006	-0.457023	0.311471	-1.58293	4.20841e-08	0.0996333	0.882708	0.485908	0.0583984	-0.639997	0.0157497	1.04256	5.92346e-05
CALHM6	1.49762	2.45063e-09	-0.392265	0.334768	-0.939829	0.000100236	0.125259	0.822693	1.10536	3.11941e-06	0.557795	0.0177881	1.62288	2.03139e-10
CALM1	-0.652038	7.46149e-21	-0.0917852	0.266442	-0.104907	0.0388747	-0.00226193	0.987131	-0.743823	1.88405e-23	-0.756945	2.30295e-23	-0.6543	4.90293e-21
CALM2	-0.278657	2.18558e-05	-0.04249	0.801566	-0.19761	0.00316079	0.046246	0.760076	-0.321147	1.6875e-06	-0.476267	1.15537e-10	-0.232411	0.000294308
CALM3	0.280146	0.00114875	0.0912237	0.631864	0.014728	0.896015	0.149979	0.383623	0.37137	2.654e-05	0.294874	0.00092164	0.430125	1.56397e-06
CALML3	-1.55601	3.59442e-08	0.133785	0.861765	0.613247	0.0254809	-0.0680983	0.927541	-1.42223	3.14294e-07	-0.942767	0.000514204	-1.62411	1.03884e-08
CALML3-AS1	-1.73503	3.35187e-12	0.214829	0.654721	0.31133	0.174827	0.12213	0.813668	-1.5202	2.33428e-10	-1.4237	2.36961e-09	-1.6129	2.84369e-11
CALML4	-0.455372	0.00057183	-0.00632899	0.988735	-0.449374	0.0011311	-0.0256257	0.945357	-0.461701	0.000503361	-0.904746	1.19613e-09	-0.480998	0.000268053
CALML5	-0.201325	0.512766	0.597733	0.223334	0.151047	0.666024	1.23742	0.00222997	0.396409	0.184447	-0.0502776	0.892334	1.0361	0.000428727
CALR	1.10923	3.49181e-18	-0.11378	0.562504	-0.427385	2.41438e-05	0.105493	0.617521	0.995447	3.43059e-16	0.681843	2.90197e-10	1.21472	5.13532e-20
CALR3	-0.15315	0.536788	0.122537	0.858756	-0.296238	0.253317	0.0721778	0.91343	-0.0306132	0.91041	-0.449389	0.0695118	-0.0809724	0.75163
CALU	0.0677451	0.4654	0.13192	0.440316	0.0303292	0.781444	-0.0542902	0.800042	0.199665	0.024663	0.0980743	0.311731	0.013455	0.890895
CAMK1	-0.877271	3.32738e-07	0.27519	0.346884	0.829308	2.66645e-06	0.25999	0.436107	-0.602081	0.000249767	-0.0479626	0.809708	-0.617281	0.000158878
CAMK1D	-0.279442	1.24753e-06	-0.0910105	0.365473	0.0780555	0.19127	-0.0394505	0.762025	-0.370452	1.42912e-09	-0.201386	0.000420912	-0.318892	5.81595e-08
CAMK2A	0.153558	0.564861	-0.219969	0.718752	-0.394462	0.148294	-0.0403684	0.955435	-0.066411	0.813122	-0.240905	0.388497	0.113189	0.676121
CAMK2D	0.447418	0.000256663	0.0712058	0.834335	-0.0137557	0.93259	0.168624	0.515843	0.518623	3.07381e-05	0.433662	0.000560433	0.616041	1.12288e-06
CAMK2G	-0.0653639	0.399469	-0.00436198	0.985834	0.200852	0.0105318	0.140096	0.337389	-0.0697259	0.369626	0.135488	0.0857391	0.074732	0.328322
CAMK2N1	0.384179	0.00204752	-0.163396	0.515054	-0.303826	0.0200299	0.306224	0.145277	0.220783	0.0781542	0.0803532	0.573507	0.690404	1.74219e-07
CAMK2N2	-0.164577	0.458178	0.0577082	0.935828	-0.0617839	0.816601	0.173957	0.722505	-0.106869	0.639974	-0.226361	0.330752	0.00937967	0.969183
CAMK4	-0.608098	0.0128129	-0.911345	0.0066874	-1.03886	7.2899e-05	-1.00526	0.00319713	-1.51944	1.4392e-08	-1.64696	2.53429e-09	-1.61336	2.31632e-09
CAMKK1	-0.610894	7.9368e-06	-0.0114634	0.980911	0.371922	0.00720292	-0.072596	0.82316	-0.622357	5.95415e-06	-0.238972	0.0857391	-0.68349	8.04246e-07
CAMKK2	0.506556	2.03247e-18	-0.112654	0.075759	-0.266199	3.21734e-08	0.0439478	0.646759	0.393902	4.99392e-14	0.240357	2.07683e-07	0.550504	4.0755e-20
CAMKMT	-0.381129	5.75471e-05	0.102092	0.613585	0.218884	0.0247538	0.108733	0.595597	-0.279037	0.00272736	-0.162244	0.0972711	-0.272396	0.0031327
CAMLG	-0.254997	2.21794e-05	0.0410961	0.788402	0.194199	0.00158066	-0.00723227	0.9665	-0.213901	0.000309582	-0.0607976	0.343713	-0.262229	1.24998e-05
CAMSAP1	-0.215516	0.00516849	-0.146559	0.269361	-0.320951	9.69502e-05	-0.103748	0.53604	-0.362075	6.56615e-06	-0.536467	9.79803e-10	-0.319264	4.83084e-05
CAMSAP2	0.280473	0.0948256	-0.0962707	0.840217	-0.256147	0.157318	-0.130298	0.737643	0.184202	0.284815	0.0243259	0.90778	0.150174	0.38193
CAMSAP3	0.11048	0.192595	0.0564253	0.798187	0.0730408	0.44292	0.0475125	0.817068	0.166905	0.0469302	0.183521	0.0355098	0.157992	0.0575813
CAMTA1	-0.169138	0.02153	-0.0279817	0.906035	0.203907	0.00843027	-0.0189635	0.928276	-0.19712	0.00765909	0.0347688	0.689298	-0.188102	0.0102168
CAMTA1-DT	-0.320844	0.110708	-0.127602	0.814819	0.346006	0.106668	0.199632	0.659822	-0.448446	0.0252066	0.0251621	0.920749	-0.121212	0.564685
CAMTA2	0.225403	4.19231e-05	0.00370915	0.984475	-0.0233582	0.720444	0.0385841	0.762238	0.229112	3.38505e-05	0.202045	0.000308535	0.263987	2.3319e-06
CAND1	0.571721	3.20861e-08	-0.0765219	0.748482	-0.383066	0.000160132	-0.042561	0.860541	0.495199	9.10888e-07	0.188655	0.0594419	0.52916	1.78851e-07
CAND2	0.00800454	0.969407	-0.194508	0.624728	0.16072	0.433633	-0.291539	0.433527	-0.186503	0.317732	0.168724	0.400105	-0.283534	0.116635
CANT1	0.260078	8.85916e-07	-0.00750954	0.969282	-0.0368871	0.525096	0.0650686	0.552149	0.252569	1.70611e-06	0.223191	2.54122e-05	0.325147	3.60997e-09
CANX	0.221491	0.0233928	0.0186382	0.959662	0.0418682	0.72591	-0.000317873	0.999482	0.240129	0.0143829	0.263359	0.00945163	0.221173	0.0228638
CAP1	0.174737	0.00782829	-0.0701174	0.631177	-0.0578582	0.440233	0.0746885	0.612159	0.10462	0.116919	0.116879	0.0925919	0.249426	0.000175821
CAP2	-1.33015	3.44574e-13	-0.0546763	0.911535	0.283484	0.0796029	-0.0810521	0.827239	-1.38483	8.89744e-14	-1.04667	1.20403e-09	-1.4112	3.16355e-14
CAPG	1.09316	8.09854e-17	-0.0284831	0.930648	-0.795071	5.18945e-11	0.222701	0.214653	1.06468	2.67759e-16	0.298091	0.00399606	1.31586	2.17546e-20
CAPN1	0.087427	0.0196336	-0.0822497	0.176593	-0.156121	9.78279e-05	0.0515177	0.524788	0.00517734	0.904928	-0.0686941	0.0826488	0.138945	0.000242562
CAPN10-DT	-0.0891025	0.521161	0.00831853	0.985612	0.0803074	0.606268	0.00925536	0.981906	-0.080784	0.565918	-0.00879507	0.959273	-0.0798471	0.566058
CAPN12	-1.01888	3.51932e-08	0.368632	0.186508	0.891031	1.86316e-06	0.391482	0.193606	-0.650253	0.000182164	-0.127854	0.508785	-0.627403	0.00026291
CAPN13	-0.00878945	0.958142	-0.257916	0.317975	0.520937	0.000687088	-0.239491	0.423017	-0.266705	0.0685097	0.512148	0.000698101	-0.248281	0.0869701
CAPN14	1.00498	0.000291201	-0.105299	0.904288	-0.906806	0.00165432	-0.235372	0.712866	0.899683	0.00113335	0.098176	0.767808	0.76961	0.00471669
CAPN15	0.276188	3.28477e-05	0.050235	0.761271	0.041959	0.580047	0.0483898	0.753015	0.326423	1.67542e-06	0.318147	4.18285e-06	0.324577	1.61111e-06
CAPN2	0.059828	0.187923	-0.10068	0.160642	-0.17226	0.000288996	0.0480443	0.634068	-0.0408525	0.380756	-0.112432	0.0157045	0.107872	0.0152894
CAPN3	1.29655	6.86879e-12	-0.167774	0.643245	-0.532937	0.00168685	-0.00867891	0.985996	1.12878	5.30793e-10	0.763612	8.38107e-06	1.28787	6.73371e-12
CAPN5	0.612557	2.13933e-07	-0.128987	0.579485	0.0233366	0.870375	0.0128183	0.968295	0.48357	2.31855e-05	0.635893	1.50206e-07	0.625375	1.17642e-07
CAPN6	-0.0533396	0.861753	0.0799409	0.928557	-0.348904	0.241873	0.0492528	0.949513	0.0266014	0.932526	-0.402244	0.165006	-0.00408671	0.98918
CAPN7	-0.18077	0.0490283	0.0427075	0.879872	0.089361	0.388364	-0.042059	0.85638	-0.138062	0.138937	-0.0914089	0.367022	-0.222829	0.0144709
CAPN8	-0.520411	0.0174696	0.0794222	0.911096	0.922225	8.39934e-05	0.22576	0.649873	-0.440989	0.0455164	0.401813	0.0823981	-0.294651	0.182695
CAPN9	-1.40169	2.12587e-12	0.0317818	0.959923	0.289143	0.109592	-0.0357329	0.940702	-1.36991	4.88995e-12	-1.11254	4.06425e-09	-1.43742	6.9956e-13
CAPNS1	-0.272162	0.00103077	0.0227189	0.934575	0.0993827	0.274997	0.137976	0.412708	-0.249443	0.0026201	-0.172779	0.045152	-0.134186	0.103603
CAPNS2	0.576428	4.02295e-06	-0.0926386	0.762627	-0.228727	0.0734055	0.43395	0.0122421	0.483789	8.12139e-05	0.3477	0.00511795	1.01038	1.1298e-12
CAPRIN1	-0.00295515	0.976221	0.0549956	0.801255	0.0158578	0.882396	-0.0288004	0.900831	0.0520405	0.552809	0.0129027	0.901457	-0.0317555	0.720778
CAPRIN2	0.392707	0.000769759	-0.426348	0.00743043	-0.55078	1.10504e-05	-0.119689	0.648204	-0.0336415	0.792863	-0.158073	0.20495	0.273018	0.0175779
CAPS	-1.29951	3.55138e-09	-0.150793	0.768236	-0.670586	0.00138696	-0.169473	0.714796	-1.4503	1.65631e-10	-1.97009	7.14257e-15	-1.46898	8.55052e-11
CAPS2	-0.928682	2.06128e-07	0.111872	0.801255	-0.224689	0.221274	-0.126415	0.750054	-0.816811	3.20246e-06	-1.15337	1.31283e-09	-1.0551	7.80275e-09
CAPSL	-1.38065	3.40208e-12	-0.00316855	0.995019	-0.717452	6.65137e-05	0.0601475	0.896873	-1.38382	3.39184e-12	-2.0981	7.23254e-19	-1.32051	1.1576e-11
CAPZA1	0.310384	2.0752e-05	0.00825952	0.97496	-0.109753	0.152001	0.0334489	0.851056	0.318644	1.397e-05	0.200632	0.00622061	0.343833	2.97256e-06
CAPZA2	0.182115	0.0284539	-0.0096348	0.97496	-0.0854956	0.360512	-0.0279192	0.904872	0.17248	0.0391531	0.0966191	0.287385	0.154195	0.0630572
CAPZB	-0.0869413	0.0367763	-0.0205471	0.868901	0.0454295	0.328497	0.0545731	0.549212	-0.107488	0.0100594	-0.0415118	0.366848	-0.0323682	0.454153
CARD10	0.234265	0.00303945	-0.337244	0.00131726	-0.396637	4.01216e-06	-0.259364	0.0278082	-0.10298	0.201692	-0.162373	0.0495547	-0.0250994	0.77116
CARD11	0.942366	2.73149e-17	-0.127124	0.428557	-0.516569	5.05275e-08	0.0134826	0.9554	0.815242	9.34293e-15	0.425797	2.20298e-06	0.955848	1.08675e-17
CARD14	-0.00757495	0.944996	0.0745815	0.759132	0.281137	0.00513022	0.0232584	0.932253	0.0670065	0.508195	0.273562	0.00579683	0.0156835	0.882506
CARD16	1.98962	1.52913e-17	-0.147451	0.731091	-1.19637	3.47268e-09	0.139507	0.730429	1.84217	3.97166e-16	0.793254	1.78921e-05	2.12913	6.44242e-19
CARD19	0.543034	1.34791e-06	-0.135118	0.538529	-0.128566	0.27598	0.105893	0.662886	0.407916	0.000179497	0.414468	0.00020659	0.648927	2.02162e-08
CARD6	0.674754	5.4777e-14	-0.0164038	0.950465	-0.404274	5.62684e-07	0.0866936	0.592719	0.65835	1.44592e-13	0.27048	0.000380238	0.761447	4.08128e-16
CARD8	0.924722	7.97265e-15	-0.0454177	0.875798	-0.364643	0.000293877	-0.0328584	0.901498	0.879304	5.58667e-14	0.560079	8.00142e-08	0.891864	2.32182e-14
CARD8-AS1	1.07612	6.68839e-14	-0.102726	0.71654	-0.746865	2.13455e-08	-0.0320829	0.92364	0.973395	2.42752e-12	0.329256	0.00665724	1.04404	1.54662e-13
CARD9	0.367958	0.0315054	0.648029	0.00563744	0.504585	0.00502149	0.354569	0.270619	1.01599	4.52063e-08	0.872543	2.06172e-06	0.722527	3.6089e-05
CARF	-0.401525	0.000813019	0.0729764	0.825447	-0.0353091	0.813539	-0.14117	0.593172	-0.328549	0.00592778	-0.436834	0.00042916	-0.542695	9.67526e-06
CARHSP1	-0.192538	0.0478246	0.0116067	0.97496	0.301028	0.0032133	0.0499174	0.835078	-0.180931	0.0647556	0.10849	0.307576	-0.14262	0.143799
CARM1	0.0043093	0.937993	-0.0247673	0.862172	0.0806372	0.121312	-0.0065613	0.9628	-0.020458	0.697816	0.0849465	0.096603	-0.00225199	0.967304
CARMIL1	0.552202	5.81106e-09	-0.0560845	0.809357	-0.123487	0.18855	-0.096426	0.618317	0.496118	9.20846e-08	0.428715	3.28985e-06	0.455776	5.22834e-07
CARMIL3	0.507207	0.0125171	0.427775	0.205184	0.547324	0.010468	-0.181382	0.700898	0.934982	9.78727e-06	1.05453	1.45165e-06	0.325825	0.10968
CARNMT1	-0.194285	0.224444	0.328717	0.207356	0.464508	0.00484299	0.0282386	0.94976	0.134432	0.412451	0.270224	0.104035	-0.166046	0.29978
CARNS1	-0.462832	0.0308443	0.19011	0.713986	0.27085	0.251851	0.334912	0.455461	-0.272722	0.214137	-0.191982	0.422242	-0.127921	0.572053
CARS	0.0603744	0.502113	-0.0264998	0.925494	-0.351595	0.000118298	0.103177	0.586848	0.0338747	0.716727	-0.291221	0.00105624	0.163552	0.0550958
CARS2	-0.396955	1.54915e-05	0.0712426	0.749503	0.503178	3.57003e-07	0.111935	0.567523	-0.325712	0.000313555	0.106223	0.272594	-0.285019	0.00135184
CASC1	-1.35532	4.52871e-11	-0.0677008	0.906204	-0.59303	0.0016259	-0.127328	0.764548	-1.42302	1.03103e-11	-1.94835	1.7464e-16	-1.48265	1.92564e-12
CASC10	-1.05662	1.60397e-08	-0.862285	0.000116986	-0.486602	0.00683485	-0.495019	0.066551	-1.9189	3.61771e-17	-1.54322	2.21397e-13	-1.55164	8.9134e-14
CASC15	-0.157427	0.466649	-0.868859	0.00159692	-1.13516	6.64756e-07	-0.916511	0.00108305	-1.02629	2.24096e-06	-1.29259	1.81209e-08	-1.07394	7.59188e-07
CASC19	0.526101	0.021812	0.157205	0.79558	0.114732	0.676485	0.196588	0.71469	0.683306	0.00309603	0.640833	0.00713618	0.722689	0.00163832
CASC2	-1.31176	2.07568e-11	-0.210507	0.545517	-0.531109	0.00275658	-0.3303	0.309537	-1.52227	1.44592e-13	-1.84287	1.64064e-16	-1.64206	6.14953e-15
CASC3	0.0625304	0.15947	-0.0269105	0.825447	-0.0683968	0.150558	0.0336173	0.744829	0.0356199	0.43958	-0.00586643	0.915423	0.0961476	0.0276018
CASC4	-0.149564	0.260697	0.0611082	0.87854	0.127266	0.385879	-0.138798	0.636571	-0.0884553	0.521421	-0.0222974	0.892568	-0.288361	0.025613
CASC8	-0.783161	1.70796e-06	0.303456	0.253243	0.291443	0.079966	0.282452	0.361361	-0.479705	0.00224737	-0.491718	0.00235545	-0.50071	0.00131973
CASC9	0.316459	0.172236	-0.285586	0.545448	-0.213603	0.410806	-0.419673	0.351339	0.0308729	0.906872	0.102855	0.70481	-0.103214	0.674831
CASD1	-0.338805	0.0174815	-0.0267376	0.960217	0.0983584	0.554577	-0.189328	0.543293	-0.365543	0.0106537	-0.240447	0.112489	-0.528133	0.000246444
CASK	-0.25579	0.0048857	-0.0494111	0.850065	-0.129072	0.192955	-0.028011	0.912685	-0.305201	0.000892118	-0.384861	5.69517e-05	-0.283801	0.00176252
CASKIN1	-0.318092	0.0579998	-0.0846634	0.86481	0.367178	0.0380237	0.0876935	0.831974	-0.402756	0.0164745	0.0490856	0.811861	-0.230399	0.17201
CASKIN2	0.368916	3.34415e-05	-0.0322841	0.908356	-0.110886	0.244669	0.117326	0.532005	0.336632	0.000139236	0.25803	0.00402906	0.486242	1.36885e-07
CASP1	2.72919	2.96869e-22	-0.152681	0.744741	-1.46407	9.29805e-11	0.189987	0.655771	2.57651	5.31171e-21	1.26513	2.40458e-09	2.91918	1.01561e-23
CASP10	1.59242	5.63079e-20	-0.0557392	0.883186	-0.879445	1.01419e-09	0.150371	0.57894	1.53669	3.23839e-19	0.71298	1.16324e-07	1.7428	7.26674e-22
CASP2	0.34771	3.33216e-08	-0.0509019	0.716833	-0.00720537	0.925958	-0.0424947	0.757577	0.296808	1.26703e-06	0.340504	9.21866e-08	0.305215	5.98581e-07
CASP3	0.516811	3.11379e-14	-0.103053	0.280966	-0.0819157	0.170786	-0.0156038	0.920359	0.413758	6.39776e-11	0.434895	1.96666e-11	0.501207	7.31125e-14
CASP4	1.05998	1.16221e-19	-0.0463672	0.845152	-0.504658	7.00761e-08	0.196768	0.168721	1.01362	1.0013e-18	0.555327	3.04978e-09	1.25675	3.83863e-23
CASP5	1.3812	5.89419e-08	0.360406	0.42289	-0.559834	0.024282	-0.172465	0.757893	1.74161	1.13435e-10	0.821365	0.00081484	1.20873	1.04583e-06
CASP6	-0.0325096	0.574612	-0.032389	0.833694	-0.0454964	0.467464	0.000936968	0.994977	-0.0648986	0.248113	-0.078006	0.183996	-0.0315727	0.58523
CASP7	1.2184	5.95494e-22	-0.147494	0.334768	-0.714522	1.01351e-11	0.0147623	0.951497	1.07091	2.56011e-19	0.503882	7.30205e-08	1.23317	2.75556e-22
CASP8	1.36105	3.50029e-16	-0.0418565	0.921931	-0.773409	9.49408e-08	0.0944636	0.757577	1.3192	1.31736e-15	0.587643	1.69648e-05	1.45552	1.64409e-17
CASP8AP2	0.553262	1.67044e-06	-0.0519667	0.8778	-0.140571	0.245926	0.0201545	0.949073	0.501295	1.13898e-05	0.412691	0.000325439	0.573416	7.22787e-07
CASP9	-0.217494	0.000187859	-0.0492311	0.72448	0.0181043	0.800211	-0.100166	0.385242	-0.266726	7.7986e-06	-0.19939	0.000818845	-0.317661	1.86333e-07
CASQ2	-0.725271	0.00290971	-0.481245	0.243073	0.338213	0.203339	0.141292	0.813124	-1.20652	2.31982e-06	-0.387057	0.135483	-0.583979	0.0156155
CAST	0.360196	2.24341e-05	-0.140498	0.346873	-0.456408	5.74319e-07	0.0418657	0.83793	0.219698	0.00790584	-0.0962127	0.284678	0.402061	2.80724e-06
CASTOR1	-0.671372	2.66993e-05	-0.0247434	0.966024	0.484458	0.00300576	0.0804774	0.834353	-0.696115	1.53505e-05	-0.186914	0.268768	-0.590895	0.000169344
CASTOR2	-0.941135	1.27806e-09	0.305292	0.17506	0.7878	3.36513e-07	0.0935275	0.778909	-0.635843	1.04629e-05	-0.153335	0.313062	-0.847608	1.79022e-08
CASTOR3	-1.09729	1.98756e-13	0.0500284	0.898321	0.319544	0.013457	-0.136822	0.620636	-1.04726	1.10029e-12	-0.777742	1.39316e-08	-1.23411	1.92762e-15
CASZ1	0.352611	6.94304e-07	-0.249474	0.00683501	-0.536061	4.78257e-11	-0.0435757	0.786157	0.103137	0.130858	-0.18345	0.00846259	0.309035	8.30454e-06
CAT	-1.49136	3.5641e-24	0.565761	3.06913e-06	0.90442	1.25434e-13	0.453788	0.000298989	-0.925598	4.57574e-15	-0.586939	1.64331e-08	-1.03757	3.18026e-17
CATIP	-1.28257	5.75725e-09	0.0226463	0.974961	-0.456033	0.0307148	-0.00629596	0.990697	-1.25993	9.93526e-09	-1.73861	7.96022e-13	-1.28887	4.29549e-09
CATIP-AS1	-0.355294	0.0801621	0.180127	0.71228	-0.341663	0.116356	0.0797656	0.881067	-0.175167	0.406959	-0.696957	0.000913788	-0.275529	0.176464
CATSPER1	-0.376673	0.0887773	0.108362	0.869271	-0.153198	0.550602	0.0447194	0.94312	-0.268311	0.234795	-0.529871	0.0208473	-0.331953	0.132789
CATSPER2	-0.104419	0.414706	-0.0142285	0.97496	0.132819	0.333744	-0.120089	0.669504	-0.118648	0.35262	0.0284005	0.85226	-0.224508	0.067148
CATSPER2P1	-0.105103	0.548041	-0.0791978	0.87609	-0.0278383	0.8985	0.179347	0.631069	-0.1843	0.280844	-0.132941	0.476549	0.0742449	0.676873
CATSPER3	-0.241635	0.298011	0.353201	0.408301	0.362722	0.137514	0.492435	0.230239	0.111566	0.647219	0.121087	0.647139	0.2508	0.275393
CATSPERB	0.416208	0.00588554	0.26877	0.31771	0.49543	0.00185719	-0.131328	0.709572	0.684979	1.2642e-05	0.911638	4.69973e-08	0.284881	0.0586055
CATSPERD	-1.43996	1.97416e-09	0.254773	0.57264	-0.711656	0.00173822	-0.106609	0.842194	-1.18519	2.75251e-07	-2.15162	5.46178e-15	-1.54657	2.0935e-10
CATSPERE	-0.233881	0.165473	0.0103028	0.985612	-0.102356	0.602444	-0.105746	0.791879	-0.223578	0.188962	-0.336237	0.0543472	-0.339627	0.0404452
CATSPERG	0.747051	3.87005e-07	-0.213701	0.416448	-0.70603	3.07785e-06	0.0135662	0.973825	0.53335	0.000160664	0.0410208	0.810175	0.760617	2.30965e-07
CAV1	-0.020647	0.865999	-0.306895	0.0539906	-0.0227806	0.870542	-0.140966	0.550793	-0.327542	0.00261461	-0.0434276	0.737734	-0.161613	0.136259
CAV2	0.359424	0.000421987	-0.174513	0.334972	-0.205066	0.0551995	-0.0149898	0.959246	0.184911	0.068779	0.154359	0.151669	0.344435	0.000657726
CAVIN1	0.205454	0.122037	-0.306656	0.14018	-0.445981	0.00131881	-0.0963536	0.757682	-0.101202	0.46544	-0.240527	0.0835643	0.109101	0.423199
CAVIN2	0.0578318	0.699282	-0.183648	0.508525	0.303939	0.0370661	-0.446134	0.0305807	-0.125816	0.380849	0.361771	0.0115016	-0.388302	0.00467548
CAVIN3	0.163534	0.178108	-0.283464	0.131331	-0.595729	4.90134e-06	0.0345166	0.919342	-0.11993	0.334032	-0.432195	0.000533724	0.19805	0.0984021
CBARP	0.510231	0.000999298	-0.0783609	0.863918	-0.376888	0.0199817	-0.022729	0.959269	0.431871	0.00520607	0.133343	0.438209	0.487502	0.001538
CBFA2T2	0.176134	0.00429431	-0.0220992	0.912123	-0.066829	0.33174	-0.0778681	0.566554	0.154035	0.0126861	0.109305	0.0933851	0.0982656	0.111421
CBFA2T3	-0.202188	0.084835	0.0165385	0.970495	0.184738	0.143714	-0.134136	0.605779	-0.18565	0.117282	-0.0174507	0.905652	-0.336324	0.00383372
CBFB	0.116382	0.314959	-0.00835187	0.9835	-0.110289	0.385342	-0.0842201	0.752944	0.10803	0.355256	0.0060923	0.966744	0.0321616	0.79497
CBL	0.120505	0.415161	-0.108653	0.766057	0.0120046	0.950623	-0.154048	0.629679	0.0118519	0.942638	0.132509	0.40109	-0.0335436	0.830428
CBLB	0.00565056	0.946171	0.12181	0.36125	0.216359	0.00471015	-0.126513	0.389742	0.12746	0.0833008	0.222009	0.00330415	-0.120862	0.0973314
CBLC	0.225258	0.0127776	0.108016	0.568524	0.253319	0.00777776	0.250222	0.0867838	0.333275	0.000296801	0.478577	9.84674e-07	0.475481	6.26409e-07
[truncated: 14,099 more rows]

## Sheet: Table S3
Table S3. Ingenuity canonical pathway analysis enrichments for RV-A16 differentially expressed genes.
Ingenuity Canonical Pathways	-log(B-H p-value)	Virus Effect direction	Molecules
IL-10 Signaling	13.2	Up	AKT1,AKT2,ATF4,BCL3,BHLHE40,BMP2,CCN4,CCND1,CCR1,CDKN1A,CDKN2D,CHUK,CREB1,CREB3,CREB3L1,CREBBP,DDIT4,ELK1,FCGR2A,FCGR2C,FFAR2,FOS,HLA-A,HLA-B,HLA-C,HLA-DMA,HLA-DOB,HLA-DRA,HLA-E,HLA-F,HLA-G,HMOX1,ICAM1,IFNGR1,IFNGR2,IKBKB,IKBKE,IL10,IL10RA,IL10RB,IL18RAP,IL1A,IL1RAP,IL1RL1,IL1RN,IL36A,IL36G,IL4R,IL6,IL6ST,JAK1,JUN,MAFB,MAP2K3,MAP2K4,MAP2K6,MAP3K14,MAPK11,NFKB1,NFKB2,NFKBIA,NFKBIE,NOS2,PKM,PRDM1,P…
Death Receptor Signaling	11.7	Up	ACIN1,ACTB,ACTG1,APAF1,BIRC2,BIRC3,CASP10,CASP2,CASP3,CASP7,CASP8,CFLAR,CHUK,DAXX,FADD,FAS,IKBKB,IKBKE,LMNA,MAP2K4,MAP2K7,MAP3K14,MAP3K5,NAIP,NFKB1,NFKB2,NFKBIA,NFKBIE,PARP10,PARP11,PARP12,PARP14,PARP15,PARP3,PARP4,PARP6,PARP8,PARP9,RELA,RELB,RIPK1,ROCK1,TANK,TBK1,TNF,TNFRSF10A,TNFRSF1A,TNFRSF1B,TNFRSF25,TNFSF10,TNKS2,TRADD,TRAF2,XIAP
Autophagy	11.1	Up	AKT1,AKT2,AMBRA1,ARL8B,ATF4,ATG12,ATG13,ATG16L1,ATG2A,ATG3,ATG4B,CALM1 (includes others),CAMKK2,CREB1,CREB3,CREB3L1,CREBBP,DAPK2,DDIT3,EGF,EIF2AK3,EPG5,ERN1,FGF2,FOS,FOXO1,FOXO3,FUNDC1,GCGR,GNAI3,GORASP2,IRS2,JUN,KAT5,LAMP2,MAP1LC3B,MAP1LC3B2,MAP2K4,MAP2K7,MYC,MYD88,NFKB1,NFKB2,NOD2,NRBF2,OPTN,PDGFB,PI4K2A,PIK3C2B,PIK3R1,PIK3R3,PLEKHM1,PPM1J,PPP2CA,PPP2CB,PPP2R1B,PPP2R2A,PPP2R2C,PPP2R5A,PPP2R5B,P…
Hepatic Fibrosis Signaling Pathway	9.79	Up	ACVR1B,ACVR2A,AKT1,AKT2,ARAF,ATF4,AXIN1,BMPR2,BRD4,CACNA1A,CACNB1,CACNG8,CALM1 (includes others),CASP3,CCL3,CCL5,CCND1,CD40,CEBPB,CHUK,CNR1,COL18A1,COL1A1,COL5A3,CREB1,CREB3,CREB3L1,CREBBP,CSNK1A1,CSNK1G1,CXCL8,EDN1,EDNRA,ELK1,FGF2,FLT1,FLT4,FOS,FOXO1,FZD5,FZD8,GLI2,GLIS2,GNAI1,GNAI2,GNAI3,ICAM1,IKBKB,IKBKE,IL17RA,IL18RAP,IL1A,IL1RAP,IL1RL1,IL1RN,IL36A,IL36G,IRAK1,IRAK2,IRAK3,IRAK4,IRS2,ITGA10,IT…
Molecular Mechanisms of Cancer	9.53	Up	ABL1,ACVR2A,ACVRL1,ADCY2,ADCY4,ADCY6,ADCY7,AKT1,AKT2,APAF1,APH1A,ARHGEF1,ARHGEF11,ARHGEF16,ARHGEF18,ARHGEF2,ARHGEF3,ARHGEF5,ARHGEF6,AXIN1,BAK1,BBC3,BIRC2,BIRC3,BMP1,BMP2,BMP3,BMPR1A,BMPR2,CAMK2D,CASP10,CASP3,CASP7,CASP8,CCND1,CCND3,CCNE2,CDC25B,CDK11A,CDK11B,CDK12,CDK17,CDK18,CDKN1A,CDKN2D,CFLAR,CHEK2,CREBBP,CRK,CTNNA1,CTNND1,DAXX,E2F2,E2F3,E2F4,E2F5,E2F6,E2F7,ELK1,EP300,FADD,FAS,FOS,FOXO1,FZD5,F…
TNFR2 Signaling	9.53	Up	BIRC2,BIRC3,CHUK,FOS,IKBKB,IKBKE,JUN,MAP2K4,MAP3K1,MAP3K14,NAIP,NFKB1,NFKB2,NFKBIA,NFKBIE,RELA,RELB,TANK,TBK1,TNF,TNFAIP3,TNFRSF1B,TRAF1,TRAF2,XIAP
TNFR1 Signaling	9.32	Up	APAF1,BIRC2,BIRC3,CASP2,CASP3,CASP7,CASP8,CHUK,FADD,FOS,IKBKB,IKBKE,JUN,MADD,MAP2K4,MAP3K1,MAP3K14,NAIP,NFKB1,NFKB2,NFKBIA,NFKBIE,PAK4,RELA,RELB,RIPK1,TANK,TNF,TNFAIP3,TNFRSF1A,TRADD,TRAF2,XIAP
Senescence Pathway	9.32	Up	ACVR1B,ACVR2A,AKT1,AKT2,ANAPC10,ARAF,ATF3,BHLHE40,BMPR2,CACNA1A,CACNB1,CACNG8,CALM1 (includes others),CAPN1,CAPN3,CAPN5,CCND1,CCND3,CCNE2,CDC25B,CDC27,CDKN1A,CEBPB,CGAS,CHEK2,CHUK,CREBBP,CXCL8,DMTF1,E2F2,E2F3,E2F4,E2F5,E2F6,E2F7,EED,EIF4E,ELF1,ELF2,ELF3,ELF4,EP300,ETS2,FOXO3,FZR1,GADD45A,GADD45B,GATA4,HBP1,IFNB1,IKBKB,IKBKE,IL1A,IL6,IRF3,ITSN2,JUN,KAT2B,MAP2K3,MAP2K4,MAP2K6,MAP2K7,MAPK6,MAPK7,MAP…
Interferon Signaling	8.8	Up	BAK1,IFI35,IFI6,IFIT1,IFIT3,IFITM1,IFITM2,IFITM3,IFNB1,IFNGR1,IFNGR2,IRF1,IRF9,ISG15,JAK1,JAK2,MX1,OAS1,PIAS1,PSMB8,PTPN2,RELA,SOCS1,STAT1,STAT2,TAP1
Wound Healing Signaling Pathway	8.73	Up	ACVR1B,ACVR2A,BMPR2,CALCA,CCL5,CEBPB,CHUK,CLCF1,COL16A1,COL17A1,COL18A1,COL1A1,COL22A1,COL24A1,COL25A1,COL4A6,COL5A3,COL7A1,COL8A1,COL9A2,CXCL8,EGF,FGF2,FOS,GRB2,HBEGF,IFNGR1,IFNGR2,IKBKB,IL11,IL12A,IL15,IL17C,IL18RAP,IL1A,IL1RAP,IL1RL1,IL1RN,IL36A,IL36G,IL6,ITGA3,ITGB4,JAK1,JAK2,JUN,KRT17,KRT6A,KRT6B,KRT6C,LAMA1,LAMA3,LAMA5,LAMB1,LAMB3,LAMC1,LAMC2,LIF,MAP2K3,MAP2K4,MAP2K6,MAP2K7,MAP3K14,MMP1,MMP…
Role Of Chondrocytes In Rheumatoid Arthritis Signaling Pathway	8.73	Up	CAMKK2,CASP1,CASP3,CASP8,CEBPB,CEBPD,CEBPG,CEBPZ,CFLAR,CHUK,CXCL8,EGR1,FADD,FOS,FOXO3,IL17RA,IL17RC,IL18R1,IL18RAP,IL1A,IL1RAP,IL1RL1,IL1RN,IL36A,IL36G,IL6,IL6ST,IRAK1,IRAK4,ITGA5,JAK2,JUN,MAP2K4,MAPK11,MLKL,MMP1,MMP13,MMP14,MMP15,MMP17,MMP19,MMP25,MMP28,MMP9,NFKB1,NFKB2,NOS2,PPP3CC,PPP3R1,PRKAB1,PRKAG1,PTGS2,RIPK1,RIPK3,RPTOR,STAT3,TLR2,TNF,TNFRSF1A,TNFRSF1B,TRAF6,VEGFA,VEGFC
Protein Ubiquitination Pathway	8.73	Up	ANAPC10,B2M,BAG1,BAP1,BIRC2,BIRC3,CUL2,DNAJA1,DNAJB11,DNAJB12,DNAJB14,DNAJB9,DNAJC1,DNAJC13,DNAJC15,DNAJC24,DNAJC5,DNAJC7,DNAJC9,FBXW7,FZR1,HLA-A,HLA-B,HLA-C,HLA-E,HLA-F,HLA-G,HSCB,HSP90B1,HSPA13,HSPA1A/HSPA1B,HSPA5,HSPA6,HSPB9,MED20,MR1,PSMA1,PSMA2,PSMA3,PSMA4,PSMA5,PSMA6,PSMB10,PSMB2,PSMB3,PSMB7,PSMB8,PSMB9,PSMC1,PSMC2,PSMC3,PSMC4,PSMC6,PSMD11,PSMD14,PSMD3,PSMD5,PSMD7,PSME1,PSME2,RBX1,SASS6,SMU…
iNOS Signaling	8.38	Up	CALM1 (includes others),CHUK,CREBBP,FOS,HMGA1,IFNGR1,IFNGR2,IKBKB,IKBKE,IRAK1,IRAK2,IRAK3,IRAK4,IRF1,JAK1,JAK2,JAK3,JUN,MAPK11,MYD88,NFKB1,NFKB2,NFKBIA,NFKBIE,NOS2,RELA,RELB,STAT1,TAB1,TRAF6
Role of Hypercytokinemia/hyperchemokinemia in the Pathogenesis of Influenza	8.23	Up	AREG,CASP1,CCL3,CCL4,CCL5,CXCL10,CXCL3,CXCL8,DDX58,EIF2AK2,IFIT2,IFIT3,IFNB1,IFNL1,IFNL2,IFNL3,IFNLR1,IL10,IL12A,IL1A,IL1RN,IL36A,IL36G,IL6,IRF3,IRF7,IRF9,ISG15,ISG20,JAK1,MX1,MYD88,NFKB1,NFKB2,OAS1,OAS2,OAS3,RSAD2,STAT1,STAT2,TICAM1,TLR3,TLR7,TNF
Acute Phase Response Signaling	8.23	Up	AKT1,AKT2,C1R,C1S,C2,C3,C4A/C4B,CEBPB,CFB,CHUK,CP,CRABP2,ELK1,FOS,GRB2,HMOX1,HNRNPK,IKBKB,IKBKE,IL1A,IL1RAP,IL1RN,IL36A,IL36G,IL6,IL6ST,IRAK1,JAK2,JUN,MAP2K3,MAP2K4,MAP2K6,MAP2K7,MAP3K1,MAP3K14,MAP3K5,MAPK11,MYD88,NFKB1,NFKB2,NFKBIA,NFKBIE,NR3C1,OSMR,PIK3R1,PIK3R3,RALA,RALB,RAP1B,RASD1,RELA,RELB,RIPK1,RRAS,RRAS2,SAA4,SERPINE1,SERPINF1,SERPING1,SHC1,SOCS1,SOCS2,SOCS3,SOD2,SOS1,STAT3,TAB1,TCF4,TF,T…
IL-6 Signaling	8.23	Up	AKT1,AKT2,CEBPB,CHUK,COL1A1,CXCL8,ELK1,FOS,GRB2,IKBKB,IKBKE,IL18RAP,IL1A,IL1RAP,IL1RL1,IL1RN,IL36A,IL36G,IL6,IL6ST,JAK2,JUN,MAP2K3,MAP2K4,MAP2K6,MAP2K7,MAP3K14,MAPK11,MAPKAPK2,MCL1,NFKB1,NFKB2,NFKBIA,NFKBIE,PIK3C2B,PIK3R1,PIK3R3,RALA,RALB,RAP1B,RASD1,RELA,RELB,RRAS,RRAS2,SHC1,SOCS1,SOCS3,SOS1,STAT3,TAB1,TNF,TNFAIP6,TNFRSF1A,TNFRSF1B,TRAF2,TRAF6,VEGFA
Role of Macrophages, Fibroblasts and Endothelial Cells in Rheumatoid Arthritis	8.2	Up	AKT1,AKT2,ATF4,AXIN1,CALM1 (includes others),CAMK2D,CCL5,CCND1,CEBPB,CEBPD,CEBPG,CEBPZ,CHUK,CREB1,CREB3,CREB3L1,CREBBP,CSF1,CSNK1A1,CSNK1G1,CXCL8,DKK1,DKK3,F2RL1,FGF2,FOS,FZD5,FZD8,ICAM1,IKBKB,IKBKE,IL10,IL15,IL17RA,IL17RC,IL18R1,IL18RAP,IL1A,IL1RAP,IL1RL1,IL1RN,IL36A,IL36G,IL6,IL6ST,IL7,IRAK1,IRAK2,IRAK3,IRAK4,JAK2,JUN,LTBR,MAP2K3,MAP2K4,MAP2K6,MAP2K7,MAP3K14,MAPKAPK2,MMP1,MMP13,MYC,MYD88,NFAT5,…
Tumor Microenvironment Pathway	8.18	Up	AKT1,AKT2,ARAF,CCND1,CD274,CD44,CFLAR,COL1A1,CSF1,CSF3,CXCL8,EGF,FAS,FGF11,FGF13,FGF2,FGF5,FOS,FOXO1,FOXO3,HLA-A,HLA-B,HLA-C,HLA-E,HLA-F,HLA-G,ICAM1,IDO1,IDO2,IGF2,IL10,IL6,ITGA5,JAK2,JUN,LGALS9,MAP3K14,MMP1,MMP13,MMP14,MMP15,MMP17,MMP19,MMP25,MMP28,MMP9,MYC,NFKB1,NFKB2,NOS2,PDCD1LG2,PDGFB,PIK3C2B,PIK3R1,PIK3R3,PTGS2,RAC1,RALA,RALB,RAP1B,RASD1,RELA,RELB,RRAS,RRAS2,SLC16A1,SPP1,STAT3,TGFB3,TNF,TNF…
Toll-like Receptor Signaling	8.17	Up	CHUK,EIF2AK2,ELK1,FOS,IKBKB,IL12A,IL1A,IL1RL1,IL1RN,IL36A,IL36G,IRAK1,IRAK2,IRAK3,IRAK4,JUN,MAP2K3,MAP2K4,MAP2K6,MAP3K1,MAP3K14,MAPK11,MYD88,NFKB1,NFKB2,NFKBIA,RELA,RELB,TAB1,TAB2,TICAM1,TIRAP,TLR2,TLR3,TLR7,TNF,TNFAIP3,TRAF1,TRAF4,TRAF6,UBC
Role Of Osteoclasts In Rheumatoid Arthritis Signaling Pathway	8	Up	ACP5,ADAM10,ADAM15,ADAM17,ADAM28,ADAM8,AKT1,AKT2,ARAF,ATF4,BIRC2,BIRC3,BLNK,CALM1 (includes others),CCND1,CHUK,COL16A1,COL17A1,COL18A1,COL1A1,COL22A1,COL24A1,COL25A1,COL4A6,COL5A3,COL7A1,COL8A1,COL9A2,CREB1,CREB3,CREB3L1,CREBBP,CSF1,CTNNA1,CTNNA3,ELK1,FCGR2A,FCGR2C,FOS,FOXO1,FOXO3,GRB2,IKBKB,IKBKE,IL10,IL18RAP,IL1RAP,IL1RL1,IL7,ITGA5,JUN,MAP2K3,MAP2K4,MAP2K6,MAP2K7,MAP3K14,MAP3K5,MAPK11,MITF,MMP1…
Activation of IRF by Cytosolic Pattern Recognition Receptors	7.95	Up	ADAR,CD40,CHUK,CREBBP,DDX58,DHX58,FADD,IFIH1,IFIT2,IFNB1,IKBKB,IKBKE,IL10,IL6,IRF3,IRF7,IRF9,ISG15,JUN,MAP2K4,NFKB1,NFKB2,NFKBIA,NFKBIE,PPIB,RELA,RELB,RIPK1,SIKE1,STAT1,STAT2,TANK,TBK1,TNF,TRAF6,ZBP1
TWEAK Signaling	7.82	Up	APAF1,BIRC2,BIRC3,CASP3,CASP7,CASP8,CHUK,FADD,IKBKB,IKBKE,MAP3K14,NAIP,NFKB1,NFKB2,NFKBIA,NFKBIE,RELA,RELB,RIPK1,TNFRSF12A,TNFRSF25,TRADD,TRAF1,TRAF2,XIAP
FAT10 Signaling Pathway	7.48	Up	MAP1LC3B,NUB1,PSMA1,PSMA2,PSMA3,PSMA4,PSMA5,PSMA6,PSMB10,PSMB2,PSMB3,PSMB7,PSMB8,PSMB9,PSMC1,PSMC2,PSMC3,PSMC4,PSMC6,PSMD11,PSMD14,PSMD3,PSMD5,PSMD7,PSME1,PSME2,PSME3,PSMF1,TNF,UBA1,UBA6,UBE2Z
Inhibition of ARE-Mediated mRNA Degradation Pathway	7.42	Up	AKT1,AKT2,CNOT1,CNOT2,CNOT4,DCP1A,DCP2,EXOSC10,EXOSC8,EXOSC9,MAPK11,MAPK6,MAPK7,MAPKAPK2,PAPOLG,PPM1J,PPP2CA,PPP2CB,PPP2R1B,PPP2R2A,PPP2R2C,PPP2R5A,PPP2R5B,PRKAG1,PRKAR2B,PSMA1,PSMA2,PSMA3,PSMA4,PSMA5,PSMA6,PSMB10,PSMB2,PSMB3,PSMB7,PSMB8,PSMB9,PSMC1,PSMC2,PSMC3,PSMC4,PSMC6,PSMD11,PSMD14,PSMD3,PSMD5,PSMD7,PSME1,PSME2,PSME3,PSMF1,PTPA,TIA1,TNF,TNFRSF1A,TNFRSF1B,TNFSF10,TNFSF11,TNFSF13,TNFSF13B,TNFS…
Coronavirus Pathogenesis Pathway	7.37	Up	ABL1,ACE,ACE2,ADAM17,ATF4,BST2,CASP1,CASP3,CASP8,CCDC22,CCL5,CCND1,CCNE2,CHUK,CXCL8,DDIT3,DDX58,DPP9,E2F2,E2F3,E2F4,E2F5,E2F6,E2F7,EIF2AK3,EIF4E,ELK1,EP300,FOS,HDAC1,HDAC6,HDAC7,HDAC9,IFNB1,IKBKB,IL17RA,IL6,IRF3,IRF7,IRF9,JAK1,JUN,KPNB1,MAP2K4,MAPK11,NFKB1,NFKB2,NFKBIA,NFKBIE,NPC1,NUP98,OAS1,OAS2,OAS3,PIKFYVE,PTGES2,PTGS2,RELA,RELB,RIPK1,RIPK3,SERPINE1,SIN3A,SMAD3,SMAD4,STAT1,STAT2,STAT3,STING1,T…
Multiple Sclerosis Signaling Pathway	7.36	Up	C2,C3,CAPN1,CAPN3,CAPN5,CASP1,CASP8,CLCF1,CTNNA3,CXCL8,CYP27B1,DUSP6,EED,FADD,FAS,GRIN3A,GRINA,HLA-A,HLA-B,HLA-C,HLA-DMA,HLA-DOB,HLA-DRA,HLA-E,HLA-F,HLA-G,IFNGR1,IFNGR2,IL10,IL11,IL12A,IL15,IL17C,IL17RA,IL17RC,IL1A,IL36A,IL36G,IL6,IL7R,IRF1,IRF4,JARID2,LIF,MAPK11,MGAT1,MMP9,MTF2,NCOA3,NFKB1,NFKB2,P2RX4,PARP10,PARP11,PARP12,PARP14,PARP15,PARP3,PARP4,PARP6,PARP8,PARP9,PPARD,PPARG,RNF213,SLC8A1,SLC8…
Production of Nitric Oxide and Reactive Oxygen Species in Macrophages	7.29	Up	AKT1,AKT2,APOD,APOL1,CHUK,CLU,CREBBP,CYBA,FOS,IFNGR1,IFNGR2,IKBKB,IKBKE,IRF1,JAK1,JAK2,JAK3,JUN,LYZ,MAP2K4,MAP2K7,MAP3K1,MAP3K10,MAP3K11,MAP3K13,MAP3K14,MAP3K5,MAP3K6,MAP3K8,MAPK11,NCF1,NCF4,NFKB1,NFKB2,NFKBIA,NFKBIE,NOS2,PIK3C2B,PIK3R1,PIK3R3,PPM1J,PPP1R10,PPP1R11,PPP1R12A,PPP1R3D,PPP2CA,PPP2CB,PPP2R1B,PPP2R2A,PPP2R2C,PPP2R5A,PPP2R5B,PRKCE,PRKCQ,PTPA,RAC1,RAP1B,RELA,RELB,RHOB,RHOC,RHOF,RHOG,RHOH…
Pulmonary Fibrosis Idiopathic Signaling Pathway	7.29	Up	ACTB,ACTG1,ACVR1B,ACVR2A,ADAM10,ADAMTS1,AJUBA,AKT1,AKT2,ARAF,AREG,AXL,BBC3,BMPR2,CCN4,CCND1,COL16A1,COL17A1,COL18A1,COL1A1,COL22A1,COL24A1,COL25A1,COL4A6,COL5A3,COL7A1,COL8A1,COL9A2,CREBBP,EDN1,EDNRA,EED,EGR1,EP300,EPHB3,EZH1,FGF2,FGFR3,FOS,FOXO1,FOXO3,FZD5,FZD8,GLI2,GNA13,GRB2,HES1,IL11,IL17RA,IL6,IL6ST,JAG1,JAK2,JARID2,JUN,LATS1,LATS2,LPAR1,MAP2K3,MAP2K4,MAP2K6,MAPK11,MMP1,MMP13,MMP14,MMP15,MMP…
HER-2 Signaling in Breast Cancer	7.25	Up	AKT1,AKT2,ARAF,AREG,ARF1,ARF3,ARF4,ARF6,CASP3,CASP7,CCND1,CCNE2,CDKN1A,CHUK,COX10,COX15,COX5A,COX6B2,EGF,ELF1,ELF2,ELF3,ELF4,ELK1,ERBB3,ETS2,FGR,FOS,FOXO1,FOXO3,FRK,GRB2,HBEGF,IKBKB,IKBKE,IL1A,ITGB2,ITGB4,ITGB7,JUN,KPNB1,LYN,MYC,NFKB1,NFKB2,NFKBIA,NFKBIE,NRG1,NUP160,NUP205,NUP214,NUP42,NUP50,NUP88,NUP93,NUP98,PARD6B,PIK3C2B,PIK3R1,PIK3R3,POM121/POM121C,PRKCE,PRKCQ,PTEN,PTGS2,RALA,RALB,RAP1B,RASD1…
Neuroinflammation Signaling Pathway	7.12	Up	ACVR1B,ACVR2A,AGER,AKT1,AKT2,APH1A,ATF4,B2M,BACE2,BIRC2,BIRC3,BMPR2,CALB2,CASP1,CASP3,CASP8,CCL3,CCL5,CD40,CFLAR,CHUK,CREB1,CREB3,CREB3L1,CREBBP,CX3CL1,CXCL10,CXCL8,FAS,FOS,GABRE,GABRP,GRIN3A,GRINA,HLA-A,HLA-B,HLA-C,HLA-DMA,HLA-DOB,HLA-DRA,HLA-E,HLA-F,HLA-G,HMOX1,ICAM1,IFNB1,IFNGR1,IFNGR2,IKBKB,IKBKE,IL10,IL12A,IL6,IRAK1,IRAK2,IRAK3,IRAK4,IRF3,IRF7,JAK1,JAK2,JAK3,JUN,MAP2K4,MAPK11,MAPK6,MAPK7,MMP…
PPAR Signaling	6.9	Up	CHUK,CITED2,CREBBP,EP300,FOS,GRB2,HSP90B1,IKBKB,IKBKE,IL18RAP,IL1A,IL1RAP,IL1RL1,IL1RN,IL36A,IL36G,JUN,MAP3K14,MED1,NCOA1,NCOR1,NFKB1,NFKB2,NFKBIA,NFKBIE,NRIP1,PDGFB,PPARD,PPARG,PTGS2,RALA,RALB,RAP1B,RASD1,RELA,RELB,RRAS,RRAS2,SHC1,SNW1,SOS1,STAT5A,TAB1,TNF,TNFRSF1A,TNFRSF1B,TRAF2,TRAF6
Role of Osteoblasts, Osteoclasts and Chondrocytes in Rheumatoid Arthritis	6.82	Up	ACP5,ACVR2A,ACVRL1,ADAM17,AKT1,AKT2,ALPL,AXIN1,BIRC2,BIRC3,BMP1,BMP2,BMP3,BMPR1A,BMPR2,CALM1 (includes others),CHUK,COL1A1,CSF1,CSNK1A1,CSNK1G1,DKK1,DKK3,FOS,FOXO1,FZD5,FZD8,IKBKB,IKBKE,IL10,IL11,IL18R1,IL18RAP,IL1A,IL1RAP,IL1RL1,IL1RN,IL36A,IL36G,IL6,IL7,ITGA5,JUN,MAP2K3,MAP2K4,MAP2K6,MAP2K7,MAP3K14,MAP3K5,MMP1,MMP13,MMP14,NAIP,NFAT5,NFKB1,NFKBIA,NFKBIE,PIK3C2B,PIK3R1,PIK3R3,PPP3CC,PPP3R1,PTK2B,…
Glucocorticoid Receptor Signaling	6.78	Up	ACTB,ADRB2,AKT1,AKT2,ARID1A,B2M,BAG1,BRD7,CCL3,CCL5,CD3E,CDKN1A,CHUK,CREB1,CREBBP,CXCL3,CXCL8,EGF,ELK1,EP300,FKBP5,FOS,FOXO3,GRB2,GTF2B,GTF2E1,GTF2E2,GTF2F1,H3-3A/H3-3B,HLA-A,HLA-B,HLA-C,HLA-DMA,HLA-DOB,HLA-DRA,HLA-E,HLA-F,HLA-G,HSP90B1,HSPA1A/HSPA1B,HSPA5,HSPA6,ICAM1,IFNB1,IFNE,IFNLR1,IKBKB,IKBKE,IL10,IL10RA,IL10RB,IL15RA,IL17RA,IL17RC,IL17RE,IL18R1,IL18RAP,IL1A,IL1RL1,IL1RN,IL20RB,IL22RA1,IL2RG…
Osteoarthritis Pathway	6.78	Up	ACVRL1,AGER,ALPL,ATF4,BMP2,BMPR1A,BMPR2,CASP1,CASP10,CASP2,CASP3,CASP4,CASP5,CASP7,CASP8,CCN4,CEBPB,CHUK,CREB1,CREB3,CREB3L1,CREBBP,CTNNA1,CXCL8,DDIT4,DDR2,DKK1,ELF3,EPAS1,FADD,FGF2,FGFR3,FOXO3,FZD5,FZD8,GLI2,GLIS2,HES1,IL18RAP,IL1RAP,IL1RL1,ITGA10,ITGA3,ITGA5,ITGB2,ITGB4,ITGB7,JAG1,MATN3,MEF2C,MMP1,MMP13,MMP9,NAMPT,NFKB1,NFKB2,NOS2,PPARD,PPARG,PRKAB1,PRKAG1,PTGS2,RAC1,RELA,RELB,S1PR2,SDC4,SIK3,S…
PI3K/AKT Signaling	6.78	Up	AKT1,AKT2,CCND1,CDKN1A,CHUK,EIF4E,FOXO1,FOXO3,GAB1,GDF15,GRB2,HSP90B1,IFNLR1,IKBKB,IKBKE,IL10RA,IL10RB,IL15RA,IL17RA,IL17RC,IL17RE,IL18R1,IL18RAP,IL1RL1,IL20RB,IL22RA1,IL2RG,IL3RA,IL4R,IL6ST,IL7R,INPPL1,ITGA10,ITGA3,ITGA5,ITGB2,ITGB4,ITGB7,JAK1,JAK2,JAK3,MAP3K5,MAP3K8,MCL1,NFKB1,NFKB2,NFKBIA,NFKBIE,NOS3,PIK3R1,PIK3R3,PPM1J,PPP2CA,PPP2CB,PPP2R1B,PPP2R2A,PPP2R2C,PPP2R5A,PPP2R5B,PTEN,PTGS2,PTPA,RALA…
ILK Signaling	6.68	Up	ACTB,ACTG1,ACTN4,AKT1,AKT2,ARHGEF6,ATF4,BMP2,CASP3,CCND1,CFL1,CFL2,CREB1,CREB3,CREB3L1,CREBBP,DSP,FERMT2,FLNB,FOS,IRS2,ITGB2,ITGB4,ITGB7,JUN,KRT18,MAP2K4,MAP2K6,MMP9,MUC1,MYC,MYH14,MYH3,MYH7,MYO10,MYO18A,NFKB1,NFKB2,NOS2,PIK3C2B,PIK3R1,PIK3R3,PPM1J,PPP1R12A,PPP2CA,PPP2CB,PPP2R1B,PPP2R2A,PPP2R2C,PPP2R5A,PPP2R5B,PTEN,PTGS2,PTPA,RAC1,RELA,RELB,RHOB,RHOC,RHOF,RHOG,RHOH,RHOT1,RHOV,RICTOR,RND1,RND3,SNA…
Unfolded protein response	6.66	Up	ATF4,CALR,CANX,CD82,CEBPB,CEBPD,CEBPG,CEBPZ,DDIT3,DNAJA1,DNAJA2,DNAJB11,DNAJB12,DNAJB14,DNAJB9,DNAJC1,DNAJC13,DNAJC15,DNAJC5,DNAJC7,DNAJC9,EIF2AK3,ERN1,HSP90B1,HSPA1A/HSPA1B,HSPA5,HSPA6,INSIG1,MAP2K7,MAP3K5,MBTPS2,OS9,P4HB,PDIA6,PPARG,PPP1R15A,SREBF1,SREBF2,SYVN1,TRAF2,VCP,XBP1
Pathogen Induced Cytokine Storm Signaling Pathway	6.57	Up	AIM2,AP3B1,BHLHE40,C3,CASP1,CASP3,CASP7,CASP8,CCL20,CCL22,CCL28,CCL3,CCL4,CCL5,CCR1,CGAS,CLCF1,CLEC7A,COL16A1,COL17A1,COL18A1,COL1A1,COL22A1,COL24A1,COL25A1,COL4A6,COL5A3,COL7A1,COL8A1,COL9A2,CX3CL1,CXCL10,CXCL11,CXCL16,CXCL17,CXCL2,CXCL3,CXCL5,CXCL8,CXCL9,DDX58,DHX58,FADD,FOS,GSDMD,HLA-DMA,HLA-DOB,HLA-DRA,IFIH1,IFNB1,IFNGR1,IFNGR2,IL10,IL11,IL12A,IL15,IL17C,IL18R1,IL18RAP,IL1A,IL1RAP,IL1RL1,IL1R…
HMGB1 Signaling	6.57	Up	AGER,AKT1,AKT2,CLCF1,CXCL8,ELK1,FOS,ICAM1,IFNGR1,IFNGR2,IL11,IL12A,IL15,IL17C,IL1A,IL36A,IL36G,IL6,JUN,KAT2B,KAT6A,KAT6B,KAT7,LIF,MAP2K3,MAP2K4,MAP2K6,MAP2K7,MAPK11,NFKB1,NFKB2,PIK3C2B,PIK3R1,PIK3R3,PLAT,RAC1,RALA,RALB,RAP1B,RASD1,RELA,RELB,RHOB,RHOC,RHOF,RHOG,RHOH,RHOT1,RHOV,RND1,RND3,RRAS,RRAS2,SERPINE1,SP1,TGFB3,TNF,TNFRSF1A,TNFRSF1B,TNFSF10,TNFSF11,TNFSF13,TNFSF13B,TNFSF14,VCAM1
Regulation Of The Epithelial Mesenchymal Transition By Growth Factors Pathway	6.55	Up	AKT1,AKT2,ARAF,CHUK,EGF,EGR1,FGF11,FGF13,FGF2,FGF5,FGFR3,FOS,FOXO1,FRS2,GAB1,GRB2,ID2,IKBKB,IKBKE,IL6,JAK1,JAK2,JAK3,JUN,LATS1,LATS2,MAP2K3,MAP2K4,MAP2K6,MAP2K7,MAP3K1,MAPK11,MET,MMP1,MMP9,NFKB1,NFKB2,OCLN,PARD6B,PDGFB,PIK3C2B,PIK3R1,PIK3R3,RAC1,RALA,RALB,RAP1B,RASD1,RELA,RELB,RRAS,RRAS2,SHC1,SMAD3,SMAD4,SMURF1,SNAI1,SOS1,STAT3,TAB1,TGFB3,TNF,TNFRSF1A,TNFRSF1B,TNFSF10,TNFSF11,TNFSF13,TNFSF13B,TNF…
RANK Signaling in Osteoclasts	6.53	Up	AKT1,AKT2,BIRC2,BIRC3,CALM1 (includes others),CHUK,ELK1,FOS,IKBKB,IKBKE,JUN,MAP2K4,MAP2K6,MAP2K7,MAP3K1,MAP3K10,MAP3K11,MAP3K13,MAP3K14,MAP3K5,MAP3K6,MAP3K8,MAPK11,MITF,NFKB1,NFKB2,NFKBIA,NFKBIE,PIK3C2B,PIK3R1,PIK3R3,PPP3CC,PPP3R1,PTK2B,RELA,RELB,SRC,TAB2,TNFSF11,TRAF2,TRAF6,XIAP
Endocannabinoid Cancer Inhibition Pathway	6.52	Up	ADCY2,ADCY4,ADCY6,ADCY7,AKT1,AKT2,ATF3,ATF4,CAMKK2,CASP1,CASP10,CASP2,CASP3,CASP4,CASP5,CASP7,CASP8,CCND1,CCND3,CCNE2,CDKN1A,CNR1,CREB1,CREB3,CREB3L1,CREBBP,DDIT3,GNA13,GNAI1,GNAI2,GNAI3,GPR55,GUCY1A1,MAP2K3,MAP2K4,MAP2K6,MAP2K7,MYC,NOS2,NOS3,NUPR1,PIK3C2B,PIK3R1,PIK3R3,PRKAB1,PRKAG1,PRKAR2B,ROCK1,RPTOR,SMPD1,SMPD3,SPTLC2,SRC,TCF4,TCF7L2,TRIB3,TWIST2,VEGFA,VEGFC
Hepatic Fibrosis / Hepatic Stellate Cell Activation	6.36	Up	CCL5,CD40,COL16A1,COL17A1,COL18A1,COL1A1,COL22A1,COL24A1,COL25A1,COL4A6,COL5A3,COL7A1,COL8A1,COL9A2,CSF1,CXCL3,CXCL8,CXCL9,ECE1,EDN1,EDNRA,EGF,FAS,FGF2,FLT1,FLT4,ICAM1,IFNGR1,IFNGR2,IGF2,IGFBP3,IGFBP4,IL10,IL10RA,IL18RAP,IL1A,IL1RAP,IL1RL1,IL4R,IL6,KDR,KLF6,LAMA1,MET,MMP1,MMP13,MMP9,MYH14,MYH3,MYH7,MYO10,MYO18A,NFKB1,NFKB2,PDGFB,RELA,RELB,SERPINE1,SMAD3,SMAD4,SMAD7,STAT1,TGFA,TGFB3,TIMP1,TIMP2,TN…
PPARŒ±/RXRŒ± Activation	6.27	Up	ABCA1,ACAA1,ACVR1B,ACVR2A,ADCY2,ADCY4,ADCY6,ADCY7,ADIPOR2,BCL3,BMPR2,CAND1,CHD5,CHUK,CPT1B,CREBBP,CYP2C18,CYP2C9,EP300,GNA14,GNAS,GPD1,GPD2,GRB2,GUCY1A1,HELZ2,HSP90B1,IKBKB,IKBKE,IL18RAP,IL1RAP,IL1RL1,IL6,JAK2,JUN,MAP2K3,MAP2K4,MAP2K6,MAP2K7,MAP3K14,MED1,MED24,MEF2C,NCOA3,NCOA6,NCOR1,NFKB1,NFKB2,NFKBIA,NFKBIE,PDIA3,PLCB3,PLCD3,PLCL1,PRKAB1,PRKAG1,PRKAR2B,RALA,RALB,RAP1B,RASD1,RELA,RELB,RRAS,RRAS2…
MSP-RON Signaling In Macrophages Pathway	6.23	Up	ATF4,CHUK,CREB1,CREB3,CREB3L1,CREBBP,ETV3,FOS,GRB2,HLA-DMA,HLA-DOB,HLA-DRA,IFNGR1,IFNGR2,IKBKB,IKBKE,IL10,IL12A,ITGB2,JAK2,JUN,KLK10,KLK11,KLK5,KLK6,MST1R,NFKB1,NFKB2,NFKBIZ,NOS2,PIK3C2B,PIK3R1,PIK3R3,PTGS2,RALA,RALB,RAP1B,RASD1,RELA,RELB,RRAS,RRAS2,SBNO2,SOCS1,SOCS3,SOS1,ST14,STAT1,STAT3,TNF
BAG2 Signaling Pathway	6.16	Up	CASP3,CDKN1A,CTSB,HSPA1A/HSPA1B,HSPA5,HSPA6,MAPKAPK2,MYC,NFKB1,NFKB2,PSMA1,PSMA2,PSMA3,PSMA4,PSMA5,PSMA6,PSMB10,PSMB2,PSMB3,PSMB7,PSMB8,PSMB9,PSMC1,PSMC2,PSMC3,PSMC4,PSMC6,PSMD11,PSMD14,PSMD3,PSMD5,PSMD7,PSME1,PSME2,PSME3,PSMF1,RELA,RELB,SP1
IL-15 Production	6.16	Up	ABL1,ABL2,AXL,CLK1,CLK3,CSK,DDR2,DYRK1A,EPHA1,EPHA2,EPHB3,ERBB3,FES,FGFR3,FGR,FLT1,FLT3LG,FLT4,FRK,IFNB1,IL15,IL6,IRF1,IRF3,JAK1,JAK2,JAK3,KDR,LMTK3,LYN,MAP2K3,MAP2K4,MAP2K6,MAP2K7,MAP3K11,MET,MST1R,NFKB1,NFKB2,PTK2B,PTK6,RELA,RELB,RET,SRC,STAT1,STYK1,TEK,TNK1,TNK2,YES1
p38 MAPK Signaling	6.13	Up	ATF4,CDC25B,CREB1,CREB3,CREB3L1,CREBBP,DAXX,DDIT3,DUSP10,ELK1,FADD,FAS,H3-3A/H3-3B,IL18RAP,IL1A,IL1RAP,IL1RL1,IL1RN,IL36A,IL36G,IRAK1,IRAK2,IRAK3,IRAK4,MAP2K3,MAP2K4,MAP2K6,MAP3K5,MAPK11,MAPKAPK2,MAX,MEF2A,MEF2C,MEF2D,MKNK1,MKNK2,MYC,PLA2G2F,PLA2G3,PLA2G4C,STAT1,TAB1,TAB2,TGFB3,TNF,TNFRSF1A,TNFRSF1B,TRADD,TRAF2,TRAF6
Role of RIG1-like Receptors in Antiviral Innate Immunity	6.13	Up	CASP10,CASP8,CHUK,CREBBP,DDX58,DHX58,EP300,FADD,IFIH1,IFNB1,IKBKB,IKBKE,IRF3,IRF7,NFKB1,NFKB2,NFKBIA,NFKBIE,RELA,RELB,RIPK1,TANK,TBK1,TRAF2,TRAF6,TRIM25
IL-17A Signaling in Fibroblasts	6.13	Up	CEBPB,CEBPD,CHUK,CXCL5,FOS,IKBKB,IKBKE,IL17RA,IL17RC,IL6,JUN,LCN2,MAPK11,MMP1,NFKB1,NFKB2,NFKBIA,NFKBIE,NFKBIZ,RELA,RELB,TRAF3IP2,TRAF6
Tight Junction Signaling	6.13	Up	ACTB,ACTG1,AKT1,AKT2,ARHGEF2,BET1L,CLDN1,CLDN12,CLDN14,CLDN23,CLDN4,CLDN7,CRB3,CSTF2,CSTF3,CTNNA1,F11R,FOS,GOSR1,GOSR2,JUN,LLGL1,MARK2,MYH14,MYH3,MYH7,MYO10,MYO18A,NAPA,NAPG,NECTIN1,NECTIN2,NFKB1,NFKB2,NSF,OCLN,PALS1,PPM1J,PPP2CA,PPP2CB,PPP2R1B,PPP2R2A,PPP2R2C,PPP2R5A,PPP2R5B,PRKAG1,PRKAR2B,PTEN,PTPA,RAC1,RELA,RELB,SMURF1,STX16,STX4,SYMPK,TGFB3,TJP1,TJP2,TJP3,TNF,TNFRSF1A,TNFRSF1B,VAMP2,VASP,VCL,…
Telomerase Signaling	5.97	Up	ABL1,AKT1,AKT2,CDKN1A,EGF,ELF1,ELF2,ELF3,ELF4,ETS2,GRB2,HDAC1,HDAC6,HDAC7,HDAC9,HSP90B1,IL2RG,MYC,PIK3C2B,PIK3R1,PIK3R3,POT1,PPM1J,PPP2CA,PPP2CB,PPP2R1B,PPP2R2A,PPP2R2C,PPP2R5A,PPP2R5B,PTPA,RALA,RALB,RAP1B,RASD1,RRAS,RRAS2,SHC1,SOS1,SP1,TEP1,TERF1,TERF2,TERF2IP,TINF2,TPP1
IL-17A Signaling in Airway Cells	5.96	Up	AKT1,AKT2,CCL20,CHUK,CXCL3,CXCL5,DEFB4A/DEFB4B,IKBKB,IKBKE,IL17RA,IL17RC,IL19,IL6,JAK1,JAK2,JAK3,MAP2K4,MAPK11,MUC5AC,MUC5B,NFKB1,NFKB2,NFKBIA,NFKBIE,PIK3C2B,PIK3R1,PIK3R3,PTEN,RELA,RELB,STAT3,TRAF3IP2,TRAF6
IL-1 Signaling	5.83	Up	ADCY2,ADCY4,ADCY6,ADCY7,CHUK,FOS,GNA13,GNA14,GNAI1,GNAI2,GNAI3,GNAS,GNG5,GUCY1A1,IKBKB,IKBKE,IL1A,IL1RAP,IRAK1,IRAK2,IRAK3,IRAK4,JUN,MAP2K3,MAP2K4,MAP2K6,MAP2K7,MAP3K1,MAP3K14,MAPK11,MYD88,NFKB1,NFKB2,NFKBIA,NFKBIE,PRKAG1,PRKAR2B,RELA,RELB,TAB1,TAB2,TRAF6
Huntington's Disease Signaling	5.79	Up	AKT1,AKT2,APAF1,ATF4,BET1L,CAPN1,CAPN3,CAPN5,CASP1,CASP10,CASP2,CASP3,CASP4,CASP5,CASP7,CASP8,CREB1,CREB3,CREB3L1,CREBBP,DNAJC5,DNM1L,DNM2,DYNC1I2,EGF,EP300,GNA14,GNG5,GOSR1,GOSR2,GRB2,HAP1,HDAC1,HDAC6,HDAC7,HDAC9,HSPA1A/HSPA1B,HSPA5,HSPA6,JUN,MAP2K4,MAP2K7,MAP3K10,NAPA,NAPG,NCOR1,NSF,PIK3C2B,PIK3R1,PIK3R3,PLCB3,POLR2A,PRKCE,PRKCQ,PSMA1,PSMA2,PSMA3,PSMA4,PSMA5,PSMA6,PSMB10,PSMB2,PSMB3,PSMB7,PSMB8…
Induction of Apoptosis by HIV1	5.79	Up	APAF1,BAK1,BBC3,BIRC2,BIRC3,CASP3,CASP8,CHUK,DAXX,FADD,FAS,IKBKB,IKBKE,MAP2K4,MAP2K7,MAP3K14,MAP3K5,NAIP,NFKB1,NFKB2,NFKBIA,NFKBIE,RELA,RELB,RIPK1,TNF,TNFRSF1A,TNFRSF1B,TRADD,TRAF1,TRAF2,XIAP
Sumoylation Pathway	5.78	Up	ARHGDIA,CBX4,CREBBP,DAXX,EP300,FAS,FOS,HDAC1,ISG20,JUN,MAP2K4,MAP3K5,NFKB1,NFKB2,NFKBIA,NR3C1,PIAS1,PML,RAC1,RANGAP1,RCOR1,RFC1,RFC2,RHOB,RHOC,RHOF,RHOG,RHOH,RHOT1,RHOV,RND1,RND3,RNF4,SENP1,SENP5,SMAD4,SP1,SP100,SUMO1,SUMO2,SUMO3,XIAP,ZEB1,ZNF217
Apoptosis Signaling	5.64	Up	ACIN1,APAF1,BAK1,BCL2A1,BIRC2,BIRC3,CAPN1,CAPN3,CAPN5,CASP10,CASP2,CASP3,CASP7,CASP8,CHUK,FAS,IKBKB,IKBKE,LMNA,MAP2K4,MAP2K7,MAP3K14,MAP3K5,MCL1,NAIP,NFKB1,NFKB2,NFKBIA,NFKBIE,PRKCE,PRKCQ,RALA,RALB,RAP1B,RASD1,RELA,RELB,ROCK1,RRAS,RRAS2,TNF,TNFRSF1A,TNFRSF1B,XIAP
CD40 Signaling	5.43	Up	CD40,CHUK,FOS,ICAM1,IKBKB,IKBKE,JAK3,JUN,MAP2K3,MAP2K4,MAP2K6,MAP2K7,MAP3K14,MAPK11,MAPKAPK2,NFKB1,NFKB2,NFKBIA,NFKBIE,PIK3C2B,PIK3R1,PIK3R3,PTGS1,PTGS2,RELA,RELB,STAT3,TANK,TNFAIP3,TRAF1,TRAF2,TRAF6
Cardiac Hypertrophy Signaling (Enhanced)	5.36	Up	ACE,ACVR1B,ACVR2A,ADCY2,ADCY4,ADCY6,ADCY7,ADRB2,AKAP13,AKT1,AKT2,ATP2A3,BMPR2,CACNA1A,CACNB1,CACNG8,CALM1 (includes others),CAMK2D,CHUK,CLCF1,CXCL8,DIAPH1,EDN1,EDNRA,EIF2B1,EIF4E,ELK1,ENPP1,EP300,FGF11,FGF13,FGF2,FGF5,FGFR3,FICD,FZD5,FZD8,GATA4,GDPD3,GNA13,GNA14,GNAI1,GNAI2,GNAI3,GNAS,GNG5,GUCY1A1,HDAC1,HDAC6,HDAC7,HDAC9,IFNLR1,IKBKB,IKBKE,IL10RA,IL10RB,IL11,IL12A,IL15,IL15RA,IL17C,IL17RA,IL17RC,…
IL-8 Signaling	5.3	Up	AKT1,AKT2,ANGPT1,ARAF,CCND1,CCND3,CHUK,CSTB,CXCL8,FLT1,FLT4,FOS,GNA13,GNA14,GNAI1,GNAI2,GNAI3,GNAS,GNG5,HBEGF,HMOX1,ICAM1,IKBKB,IKBKE,IRAK1,IRAK2,IRAK3,IRAK4,ITGB2,JUN,KDR,LASP1,MAP2K4,MMP9,MYL12B,NCF1,NFKB1,NFKBIA,NFKBIE,NOX1,PIK3C2B,PIK3R1,PIK3R3,PLD3,PRKCE,PRKCQ,PTGS2,PTK2B,RAC1,RALA,RALB,RAP1B,RASD1,RELA,RHOB,RHOC,RHOF,RHOG,RHOH,RHOT1,RHOV,RND1,RND3,ROCK1,RRAS,RRAS2,SRC,TEK,TRAF6,VASP,VCAM1,V…
MYC Mediated Apoptosis Signaling	5.26	Up	ADRB2,APAF1,BBC3,CASP2,CASP3,CASP8,CFLAR,CHUK,CREBBP,FADD,FAS,IKBKB,IKBKE,MAX,MCL1,MYC,NFKB1,NFKB2,PMAIP1,PRKAG1,PRKAR2B,TNF,TNFRSF1A,TNFRSF1B,TRADD,TRAF2
Endoplasmic Reticulum Stress Pathway	5.26	Up	ATF4,CALR,CASP3,CASP7,DDIT3,EIF2AK3,EIF2S1,ERN1,HSP90B1,HSPA5,MAP3K5,MBTPS2,TAOK3,TRAF2,XBP1
PEDF Signaling	5.25	Up	AKT1,AKT2,CASP7,CASP8,CFLAR,CHUK,ELK1,FAS,IKBKB,IKBKE,MAPK11,NFKB1,NFKB2,NFKBIA,NFKBIE,PIK3C2B,PIK3R1,PIK3R3,PNPLA2,PPARG,RAC1,RALA,RALB,RAP1B,RASD1,RELA,RELB,ROCK1,RRAS,RRAS2,SERPINF1,SOD2,TCF12,TCF4,TCF7L2,WASF2,ZEB1
Macrophage Classical Activation Signaling Pathway	5.21	Up	BPI,CCL20,CCL5,CD40,CHUK,CLCF1,CXCL10,CXCL11,CXCL8,CXCL9,EED,GBP2,GBP4,HLA-DMA,HLA-DOB,HLA-DRA,IFNB1,IFNGR1,IFNGR2,IKBKB,IL10,IL11,IL12A,IL15,IL17C,IL1A,IL36A,IL36G,IL6,IRAK1,IRAK4,IRF1,IRF3,IRF9,JAK1,JAK2,JARID2,LIF,MTF2,MYD88,NFKB1,NFKB2,NFKBIA,NFKBIE,NOS2,PARP14,PARP9,PDHX,PKM,PPARG,RELA,SOCS1,SOCS3,STAT1,STAT2,STAT3,STAT6,STK38,TGFB3,TICAM1,TNF,TNFSF10,TNFSF11,TNFSF13,TNFSF13B,TNFSF14,TRAF6
Integrin Signaling	5.15	Up	ABL1,ACTB,ACTG1,ACTN4,ACTR3,AKT1,AKT2,ARF1,ARF3,ARF4,ARF6,ARHGAP26,ARPC2,ARPC5,ARPC5L,ASAP1,BCAR1,BCAR3,CAPN1,CAPN3,CAPN5,CRK,CTTN,GRB2,GRB7,ITGA10,ITGA3,ITGA5,ITGB2,ITGB4,ITGB7,MAP2K4,MAP3K11,MYL12A,MYL12B,NCK1,PAK4,PDGFB,PIK3C2B,PIK3R1,PIK3R3,PIKFYVE,PPP1R12A,PTEN,RAC1,RALA,RALB,RAP1B,RASD1,RHOB,RHOC,RHOF,RHOG,RHOH,RHOT1,RHOV,RND1,RND3,ROCK1,RRAS,RRAS2,SHC1,SOS1,SRC,TLN2,TNK2,TSPAN3,TSPAN5,VASP…
CLEAR Signaling Pathway	5.12	Up	AKT1,AKT2,ATF4,ATP6V1G1,BLOC1S3,BMPR1A,BMPR2,CD63,CLN3,CREB1,CREB3,CREB3L1,CREBBP,CRTC2,CTSA,CTSB,DDIT4,DEPDC5,EGF,EIF2AK3,EP300,FGF2,FGFR3,FLT1,FLT4,GAA,GBA,GLB1,GNPTG,GUSB,HEXA,HEXB,HPS5,IFI30,IKBKB,KDR,MAPK11,MAPK6,MAPK7,MITF,NRBF2,PDGFB,PLBD2,PML,PPM1J,PPP2CA,PPP2CB,PPP2R1B,PPP2R2A,PPP2R2C,PPP2R5A,PPP2R5B,PPP3CC,PPP3R1,PRKAB1,PRKAG1,PRKCE,PRKCQ,PTPA,RALA,RALB,RAP1B,RASD1,RHEB,RPTOR,RRAGC,RRAS…
Role of PKR in Interferon Induction and Antiviral Response	5.12	Up	APAF1,ATF3,CASP1,CASP3,CASP5,CASP8,CHUK,DDX58,EIF2AK2,EIF2S1,FADD,FAS,FOS,HSP90B1,HSPA1A/HSPA1B,HSPA5,HSPA6,IFIH1,IFNB1,IFNGR1,IFNGR2,IKBKB,IKBKE,IRF1,IRF3,IRF9,JAK1,JUN,MAP2K3,MAP2K4,MAP2K6,MAP2K7,MAPK11,MYD88,NFKB1,NFKB2,NFKBIA,NFKBIE,NLRP10,PDGFB,RELA,RELB,SP1,STAT1,STAT2,STAT3,TAB2,TIRAP,TLR3,TNF,TNFRSF1A,TRAF6
JAK/STAT Signaling	5.09	Up	AKT1,AKT2,CDKN1A,CEBPB,FOS,GRB2,IL6,JAK1,JAK2,JAK3,JUN,NFKB1,NFKB2,PIAS1,PIK3C2B,PIK3R1,PIK3R3,PTPN1,RALA,RALB,RAP1B,RASD1,RELA,RELB,RRAS,RRAS2,SHC1,SOCS1,SOCS2,SOCS3,SOS1,STAT1,STAT2,STAT3,STAT5A,STAT6
IL-17 Signaling	5.09	Up	AKT1,AKT2,CCL20,CCL22,CEBPB,CLCF1,CSF3,CXCL3,CXCL5,CXCL8,DEFB1,DEFB4A/DEFB4B,ELK1,FOS,HSP90B1,IL11,IL12A,IL15,IL17C,IL17RA,IL17RC,IL17RE,IL1A,IL36A,IL36G,IL6,JAK1,JAK2,JUN,LCN2,LIF,MAP2K3,MAP2K4,MAP2K6,MAP3K14,MAPK11,MMP13,MMP9,MUC5AC,MUC5B,NFKB1,NOS2,PIK3C2B,PIK3R1,PIK3R3,PTGS2,RALA,RALB,RAP1B,RASD1,RELA,RRAS,RRAS2,TAB2,TGFB3,TNF,TNFSF10,TNFSF11,TNFSF13,TNFSF13B,TNFSF14,TRAF2,TRAF3IP2,TRAF6,VEGF…
Colorectal Cancer Metastasis Signaling	5.03	Up	ADCY2,ADCY4,ADCY6,ADCY7,AKT1,AKT2,AXIN1,CASP3,CCND1,E2F4,EGF,FOS,FZD5,FZD8,GNA13,GNA14,GNAI1,GNAI2,GNAI3,GNAS,GNG5,GRB2,GRK2,GRK3,GUCY1A1,IFNGR1,IL6,IL6ST,JAK1,JAK2,JAK3,JUN,MAP2K4,MMP1,MMP13,MMP14,MMP15,MMP17,MMP19,MMP25,MMP28,MMP9,MYC,NFKB1,NFKB2,NOS2,PIK3C2B,PIK3R1,PIK3R3,PRKAG1,PRKAR2B,PTGS2,RAC1,RALA,RALB,RAP1B,RASD1,RELA,RELB,RHOB,RHOC,RHOF,RHOG,RHOH,RHOT1,RHOV,RND1,RND3,RRAS,RRAS2,SMAD3,SM…
Immunogenic Cell Death Signaling Pathway	4.89	Up	ATF4,ATG12,ATG16L1,BAK1,CALR,CASP1,CASP3,CASP8,CFLAR,CGAS,CXCL10,DAPK2,DDIT3,EIF2AK3,FADD,GZMA,HSP90B1,HSPA1A/HSPA1B,HSPA5,HSPA6,IFNB1,IFNGR1,IFNGR2,IL6,IRF3,MLKL,NFKB1,NFKB2,PANX1,PDIA3,RIPK1,RIPK3,ROCK1,STING1,TLR3,TNF,TNFRSF1A,TNFRSF1B
TREM1 Signaling	4.88	Up	AKT1,AKT2,CASP1,CASP5,CCL3,CD40,CD83,CXCL3,CXCL8,DEFB4A/DEFB4B,GRB2,ICAM1,IL10,IL1RL1,IL6,IRAK1,ITGA5,JAK2,MYD88,NFKB1,NFKB2,NLRC5,NLRP10,NOD1,NOD2,RELA,RELB,STAT3,STAT5A,TLR2,TLR3,TLR7,TNF,TREM1
Chronic Myeloid Leukemia Signaling	4.88	Up	ABL1,AKT1,AKT2,CBLC,CCND1,CCND3,CDKN1A,CHUK,CRK,E2F2,E2F3,E2F4,E2F5,E2F6,E2F7,GRB2,HDAC1,HDAC6,HDAC7,HDAC9,IKBKB,IKBKE,MECOM,MYC,NFKB1,NFKB2,PIK3C2B,PIK3R1,PIK3R3,RALA,RALB,RAP1B,RASD1,RELA,RELB,RRAS,RRAS2,SIN3A,SMAD3,SMAD4,SOS1,STAT5A,TGFB3
Epithelial Adherens Junction Signaling	4.83	Up	ACTR3,ACVR1B,ACVR2A,AKT1,AKT2,ARPC2,ARPC5,ARPC5L,BMPR2,CFL1,CFL2,CRK,CTNNA1,CTNND1,DIAPH1,EGF,FARP2,LATS1,LATS2,MET,MYL12A,MYL12B,NECTIN1,NECTIN2,NOTCH2,PAK4,PPM1J,PPP2CA,PPP2CB,PPP2R1B,PPP2R2A,PPP2R2C,PPP2R5A,PPP2R5B,PRKAB1,PRKAG1,PTEN,PTPA,RAC1,RALA,RALB,RAP1B,RASD1,ROCK1,RRAS,RRAS2,SNAI1,SRC,STK3,STK4,TCF4,TCF7L2,TNS1,VCL,YAP1,YWHAZ,ZBTB33
MSP-RON Signaling In Cancer Cells Pathway	4.72	Up	AKT1,AKT2,ARAF,ATF4,CCND1,CREB1,CREB3,CREB3L1,CREBBP,ELF1,ELF2,ELF3,ELF4,ETS2,FOS,GRB2,IL3RA,ITGB4,JUN,KLK10,KLK11,KLK5,KLK6,MET,MST1R,MYC,NFKB1,NFKB2,NFKBIA,PIK3C2B,PIK3R1,PIK3R3,PLAUR,PTK2B,RALA,RALB,RAP1B,RASD1,RELA,RELB,RRAS,RRAS2,SOS1,SP1,SRC,ST14,STAT3,TCF4,TCF7L2,VEGFA,VEGFC,YWHAZ
Role of JAK1 and JAK3 in Œ≥c Cytokine Signaling	4.64	Up	BLNK,CRLF2,FES,GRB2,IL15,IL15RA,IL2RG,IL4R,IL7,IL7R,IRS2,JAK1,JAK2,JAK3,PIK3C2B,PIK3R1,PIK3R3,PTK2B,RALA,RALB,RAP1B,RASD1,RRAS,RRAS2,SHC1,SOCS1,SOCS3,STAT1,STAT3,STAT5A,STAT6
Role of JAK family kinases in IL-6-type Cytokine Signaling	4.61	Up	ADAM10,ADAM17,CCND1,CEBPD,CLCF1,FOS,HSP90B1,IL10,IL11,IL27,IL6,IL6ST,IRF1,JAK1,JAK2,JUNB,LIF,LIFR,MAP2K4,MAPK11,MCL1,MMP1,MYC,OSMR,PIAS1,SOCS1,SOCS3,STAT1,STAT3,STAT5A,TGFB3,TIMP1,VEGFA,VEGFC
HIF1Œ± Signaling	4.6	Up	ADM,AKT1,AKT2,ARAF,CAMK2D,CDKN1A,COPS5,CREBBP,CUL2,EDN1,EGF,EGLN3,EIF4E,EP300,FGF2,FLT1,FLT4,HK2,HMOX1,HSPA1A/HSPA1B,HSPA5,HSPA6,IGF2,IL6,JUN,KDR,MAP2K3,MAP2K4,MAP2K6,MAP2K7,MET,MKNK1,MKNK2,MMP1,MMP13,MMP14,MMP15,MMP17,MMP19,MMP25,MMP28,MMP9,NCF1,NCOA1,NOS2,NOX1,PDGFB,PIK3C2B,PIK3R1,PIK3R3,PKM,PPP3CC,PPP3R1,PRKCE,PRKCQ,RAC1,RALA,RALB,RAP1B,RASD1,RBX1,RRAS,RRAS2,SAT1,SERPINE1,STAT3,TF,TGFA,VEGFA,V…
NGF Signaling	4.6	Up	AKT1,AKT2,ATF4,CHUK,CREB1,CREB3,CREB3L1,CREBBP,CRK,ELK1,GAB1,GRB2,IKBKB,IKBKE,MAP2K4,MAP3K1,MAP3K10,MAP3K11,MAP3K13,MAP3K14,MAP3K5,MAP3K6,MAP3K8,MAPK7,NFKB1,NFKB2,PIK3C2B,PIK3R1,PIK3R3,RAC1,RALA,RALB,RAP1B,RASD1,RELA,RELB,RHOG,ROCK1,RRAS,RRAS2,SHC1,SMPD1,SMPD3,SOS1,TRAF4,TRAF6
Antigen Presentation Pathway	4.6	Up	B2M,CALR,CANX,CD74,HLA-A,HLA-B,HLA-C,HLA-DMA,HLA-DOB,HLA-DRA,HLA-E,HLA-F,HLA-G,MR1,NLRC5,PDIA3,PSMB8,PSMB9,TAP1,TAP2,TAPBP
Angiopoietin Signaling	4.59	Up	AKT1,AKT2,ANGPT1,ANGPTL1,CHUK,CRK,FOXO1,GRB2,GRB7,IKBKB,IKBKE,NCK1,NFKB1,NFKB2,NFKBIA,NFKBIE,NOS3,PAK4,PIK3C2B,PIK3R1,PIK3R3,RALA,RALB,RAP1B,RASD1,RELA,RELB,RRAS,RRAS2,SOS1,STAT5A,TEK,TNIP1
April Mediated Signaling	4.58	Up	CHUK,ELK1,FOS,IKBKB,IKBKE,JUN,MAP2K4,MAP2K7,MAP3K1,MAP3K14,MAPK11,NFAT5,NFKB1,NFKB2,NFKBIA,NFKBIE,RELA,RELB,TNFSF13,TRAF1,TRAF2,TRAF6
CD27 Signaling in Lymphocytes	4.58	Up	APAF1,CASP3,CASP8,CHUK,FOS,IKBKB,IKBKE,JUN,MAP2K3,MAP2K4,MAP2K6,MAP2K7,MAP3K1,MAP3K10,MAP3K11,MAP3K13,MAP3K14,MAP3K5,MAP3K6,MAP3K8,NFKB1,NFKB2,NFKBIA,NFKBIE,RELA,RELB,TRAF2
RAR Activation	4.57	Up	ACTB,ADCY2,ADCY4,ADCY6,ADCY7,AKT1,AKT2,ARID1A,BRD7,CITED2,CRABP2,CREBBP,CSK,DHRS3,DHRS9,EP300,FOS,GUCY1A1,IGFBP3,IL3RA,JAK2,JUN,KAT2B,MAP2K4,MAP3K1,MAP3K5,MAPK11,MAPKAPK2,MED1,MMP1,NCOA1,NCOR1,NFKB1,NFKB2,NR2F2,NR2F6,NRIP1,NSD1,PIK3R1,PIK3R3,PML,PNRC1,PRKAG1,PRKAR2B,PRKCE,PRKCQ,PTEN,RAC1,RARA,RARG,RDH11,RDH13,RELA,RELB,SDR16C5,SMAD1,SMAD3,SMAD4,SMAD7,SMARCD1,SMARCE1,SNW1,SORBS3,SRC,STAT5A,TAF4,TG…
Natural Killer Cell Signaling	4.52	Up	AKT1,AKT2,B2M,CFL1,CFL2,COL18A1,COL1A1,COL5A3,FCGR2A,GRB2,HLA-A,HLA-B,HLA-C,HLA-E,HLA-F,HLA-G,HSPA1A/HSPA1B,HSPA5,HSPA6,IL12A,IL15,IL18R1,IL18RAP,IRAK4,JAK2,JAK3,MAP2K3,MAP3K1,MAP3K10,MAP3K11,MAP3K13,MAP3K14,MAP3K5,MAP3K6,MAP3K8,MAPK11,MICB,MYD88,NCK1,NECTIN2,NFAT5,NFKB1,NFKB2,PAK4,PIK3C2B,PIK3R1,PIK3R3,PRKCQ,PTK2B,PVR,RAC1,RAET1L,RALA,RALB,RAP1B,RASD1,RASSF5,RELA,RELB,ROCK1,RRAS,RRAS2,SOS1,TNFSF…
Prostate Cancer Signaling	4.52	Up	ABL1,AKT1,AKT2,ATF4,CCND1,CCNE2,CDKN1A,CHUK,CREB1,CREB3,CREB3L1,CREBBP,E2F2,E2F3,E2F4,E2F5,E2F6,FOXO1,GRB2,HDAC1,HDAC6,HDAC7,HDAC9,HSP90B1,NFKB1,NFKB2,NFKBIA,NFKBIE,NKX3-1,PIK3C2B,PIK3R1,PIK3R3,PTEN,RALA,RALB,RAP1B,RASD1,RELA,RELB,RRAS,RRAS2,SIN3A,SOS1,SRD5A1
Thrombin Signaling	4.51	Up	ADCY2,ADCY4,ADCY6,ADCY7,AKT1,AKT2,ARHGEF1,ARHGEF10L,ARHGEF11,ARHGEF16,ARHGEF18,ARHGEF2,ARHGEF3,ARHGEF37,ARHGEF38,ARHGEF40,ARHGEF5,ARHGEF6,CAMK2D,CREB1,EGF,ELK1,GATA2,GATA3,GATA4,GATA6,GNA13,GNA14,GNAI1,GNAI2,GNAI3,GNAS,GNG5,GRB2,GUCY1A1,IKBKB,MAPK11,MYL12A,MYL12B,NFKB1,NFKB2,PDIA3,PIK3C2B,PIK3R1,PIK3R3,PLCB3,PLCD3,PLCL1,PPP1R12A,PRKCE,PRKCQ,RAC1,RALA,RALB,RAP1B,RASD1,RELA,RELB,RHOB,RHOC,RHOF,RHOG…
Ferroptosis Signaling Pathway	4.5	Up	ABCA1,AIFM2,ALOX12,ALOX15B,ALOX5,ANGPTL4,ARAF,ARF1,ARF3,ARF4,ARF6,ATF4,BAP1,CBS/LOC102724560,CDKN1A,CHAC1,CTSB,DPP4,EIF2AK3,EMP1,H2AC18/H2AC19,H2BC12,H2BC17,H2BC5,H2BU1,HMOX1,KEAP1,NOX1,PRKAB1,PRKAG1,RALA,RALB,RAP1B,RASD1,RRAS,RRAS2,SAT1,SLC11A2,SLC39A8,SLC3A2,SLC7A11,SP1,SREBF2,STAT3,TF,TFAP2C,VDAC2,WWTR1,YAP1
Pulmonary Healing Signaling Pathway	4.46	Up	ACKR3,ARAF,BMPR1A,BMPR2,CCND1,CFL1,CFL2,EGF,EP300,FGR,FRK,FZD5,FZD8,GRB2,HBEGF,JAG1,KDR,LYN,MAP2K4,MAPK11,MMP1,MMP13,MMP14,MMP15,MMP17,MMP19,MMP25,MMP28,MMP9,MYC,MYD88,NFKB1,NFKB2,NFKBIA,NOTCH2,PECAM1,PRKAB1,PRKAG1,PRKCE,PRKCQ,RAC1,RALA,RALB,RAP1B,RASD1,RRAS,RRAS2,SMAD1,SOS1,SRC,STAT3,STAT5A,TCF4,TCF7L2,TGFB3,THBS1,TLR2,TNF,TNFRSF1A,TNFRSF1B,VEGFA,VEGFC,WNT10A,WNT4,WWTR1,YAP1,YES1
Adrenomedullin signaling pathway	4.46	Up	ADCY2,ADCY4,ADCY6,ADCY7,ADM,AKT1,AKT2,ARAF,C3,CALCRL,CALM1 (includes others),CASP3,CEBPB,CFH,CSK,ELK1,FOS,GNA14,GNAS,GPR37,GRB2,GUCY1A1,IL1A,IL1RN,IL36A,IL36G,KCNN3,KCNN4,MAP2K3,MAP2K4,MAP2K6,MAP2K7,MAPK11,MAPK6,MAPK7,MAX,NFKB1,NFKB2,NOS3,NPR1,NPR3,PDIA3,PIK3C2B,PIK3R1,PIK3R3,PLCB3,PLCD3,PLCL1,PPARG,PRKAG1,PRKAR2B,PTK2B,RALA,RALB,RAP1B,RASD1,RELA,RELB,RRAS,RRAS2,SHC1,SLC39A7,SOS1,SOX15,TFAP2A,TFA…
Th1 Pathway	4.44	Up	APH1A,CD274,CD3E,CD40,DLL4,GATA3,GRB2,HLA-A,HLA-B,HLA-DMA,HLA-DOB,HLA-DRA,ICAM1,ICOSLG/LOC102723996,IFNGR1,IFNGR2,IL10,IL10RA,IL10RB,IL12A,IL18R1,IL27,IL6,IRF1,ITGB2,JAK1,JAK2,JAK3,LGALS9,MAP2K6,NCSTN,NFIL3,NFKB1,NOTCH2,PIK3C2B,PIK3R1,PIK3R3,PRKCQ,PSEN1,PSEN2,RUNX3,SOCS1,SOCS3,STAT1,STAT3,TNFSF11
Lymphotoxin Œ≤ Receptor Signaling	4.43	Up	AKT1,AKT2,APAF1,BIRC2,CASP3,CHUK,CREBBP,EP300,IKBKB,IKBKE,LTBR,MAP3K14,NFKB1,NFKB2,NFKBIA,PIK3C2B,PIK3R1,PIK3R3,RELA,RELB,TNFSF14,TRAF1,TRAF2,TRAF4,TRAF6,VCAM1
B Cell Activating Factor Signaling	4.42	Up	CHUK,ELK1,FOS,IKBKB,IKBKE,JUN,MAP2K4,MAP2K7,MAP3K1,MAP3K14,MAPK11,NFAT5,NFKB1,NFKB2,NFKBIA,NFKBIE,RELA,RELB,TNFSF13B,TRAF1,TRAF2,TRAF6
Pancreatic Adenocarcinoma Signaling	4.4	Up	ABL1,AKT1,AKT2,BRCA2,CCND1,CCNE2,CDKN1A,E2F2,E2F3,E2F4,E2F5,E2F6,E2F7,EGF,ELK1,GRB2,HBEGF,HDAC1,HDAC6,HDAC7,HDAC9,HMOX1,JAK1,JAK2,JAK3,MAP2K4,MMP9,NFKB1,NFKB2,PIK3C2B,PIK3R1,PIK3R3,PLD3,PTGS2,RAC1,RALA,RELA,RELB,SIN3A,SMAD3,SMAD4,STAT1,STAT3,TGFA,TGFB3,VEGFA,VEGFC
Ribonucleotide Reductase Signaling Pathway	4.39	Up	ACTB,AKT1,AKT2,ARID1A,ATF4,BRD7,CASP3,CCND1,CDH3,CDKN1A,CREB1,CREB3,CREB3L1,CREBBP,E2F2,E2F3,E2F4,E2F5,E2F6,E2F7,EIF4E,FBXL5,FOS,FOXO3,H3-3A/H3-3B,IL6,JUN,LINC00958,MAP2K4,MAPK11,MET,MMP9,MYC,NFKB1,NFKB2,NFYC,PARP10,PARP11,PARP12,PARP14,PARP15,PARP3,PARP4,PARP6,PARP8,PARP9,PIK3C2B,PIK3R1,PIK3R3,RPTOR,SMARCD1,SMARCE1,SNAI1,SP1,SRC,STAT3,THBS1,TNKS2,VEGFA
DNA Methylation and Transcriptional Repression Signaling	4.39	Up	ARID4B,CDK11A,CDK11B,CDK12,CDK17,CDK18,CEBPB,CHD5,E2F2,E2F3,E2F4,E2F5,E2F6,E2F7,FOXA1,FOXA3,GADD45A,GADD45B,GATAD2B,H3-3A/H3-3B,H4C12,H4C14,H4C15,H4C8,HDAC1,HOXB3,MBD1,MBD2,MBD4,MTA2,MYC,RELA,SAP130,SAP18,SIN3A,SMUG1,SP1,TCF12,TCF20,TCF4,TET2,TFE3,ZEB1
VDR/RXR Activation	4.37	Up	CCL5,CCNC,CDKN1A,CEBPB,CXCL10,CYP24A1,CYP27B1,EP300,FOXO1,GADD45A,GTF2B,HES1,HR,IGFBP3,IGFBP6,IL12A,IL1RL1,KLF4,KLK6,MED1,MXD1,NCOA1,NCOA2,NCOA3,NCOR1,PPARD,PRKCE,PRKCQ,SEMA3B,SERPINB1,SP1,SPP1,TNFSF11
Role of Tissue Factor in Cancer	4.34	Up	AKT1,AKT2,CASP3,CCN1,CFL1,CFL2,CSF1,CXCL8,EGR1,EIF4E,F2RL1,F3,FGF5,FGR,FRK,GNA13,GNA14,HBEGF,ITGA3,JAK2,LYN,MAPK11,MMP1,MMP13,P4HB,PDIA6,PIK3C2B,PIK3R1,PIK3R3,PLAUR,PTEN,PTK2B,RAC1,RALA,RALB,RAP1B,RASD1,RRAS,RRAS2,SRC,STAT5A,VEGFA,VEGFC,YES1
Role of Pattern Recognition Receptors in Recognition of Bacteria and Viruses	4.33	Up	C3,C3AR1,CASP1,CCL5,CLCF1,CLEC7A,CREB1,CXCL8,DDX58,EIF2AK2,EIF2S1,IFIH1,IFNB1,IL10,IL11,IL12A,IL15,IL17C,IL1A,IL36A,IL36G,IL6,IRF3,IRF7,LIF,MAP2K4,MYD88,NFKB1,NFKB2,NOD1,NOD2,OAS1,OAS2,OAS3,PIK3C2B,PIK3R1,PIK3R3,PRKCE,PRKCQ,RELA,RELB,RIPK2,RNASEL,TGFB3,TICAM1,TLR2,TLR3,TLR7,TNF,TNFSF10,TNFSF11,TNFSF13,TNFSF13B,TNFSF14,TRAF6
Estrogen Receptor Signaling	4.3	Up	ADCY2,ADCY4,ADCY6,ADCY7,AKT1,AKT2,ATF4,CACNA1A,CACNB1,CACNG8,CCNC,CCND1,CDKN1A,CFL1,CFL2,CREB1,CREB3,CREB3L1,CREBBP,DDX5,EGF,EIF2B1,EIF4E,EP300,FBXO32,FOS,FOXA1,FOXO1,FOXO3,GNA13,GNA14,GNAI1,GNAI2,GNAI3,GNAS,GNG5,GPS2,GRB2,GUCY1A1,HES1,HNRNPD,HSP90B1,IGF2,JAK1,JAK2,JAK3,JUN,MCU,MDK,MED1,MED10,MED13,MED15,MED17,MED18,MED20,MED21,MED24,MED27,MED4,MED6,MMP1,MMP13,MMP14,MMP15,MMP17,MMP19,MMP25,MMP28,…
Macrophage Alternative Activation Signaling Pathway	4.27	Up	ABCA1,AKT2,ATF4,CCL22,CEBPB,CREB1,CREB3,CREB3L1,CREBBP,CSF1,EPAS1,FOS,GRB2,H3-3A/H3-3B,H4C12,H4C14,H4C15,H4C8,HLA-DMA,HLA-DOB,HLA-DRA,IL10,IL10RA,IL10RB,IL12A,IL1A,IL1RN,IL2RG,IL36A,IL36G,IL4R,IL6,IRF4,IRS2,JAK1,JAK2,JAK3,JUN,KLF4,LLGL1,MAPK11,MYC,NFKB1,NFKB2,NFKBIA,NFKBIE,NOS2,NR1H2,NR3C1,PIK3C2B,PIK3R1,PIK3R3,PPARD,PPARG,RELA,RELB,RPTOR,SOCS1,SOCS3,SREBF1,STAT1,STAT3,STAT6,TGFB3,THBS1,TNF,ZC3H1…
FAT10 Cancer Signaling Pathway	4.26	Up	ACKR3,ACVR1B,ACVR2A,AKT1,AKT2,BMPR2,CHUK,IKBKB,IKBKE,IL6,NFKB1,NFKB2,NFKBIA,NFKBIE,RELA,RELB,SMAD3,SMAD4,STAT3,TCF7L2,TGFB3,TNF,TNFRSF1A,TNFRSF1B
STAT3 Pathway	4.25	Up	BMPR1A,BMPR2,CDKN1A,EGF,FGF2,FGFR3,FLT1,FLT4,IFNLR1,IL10RA,IL10RB,IL15RA,IL17RA,IL17RC,IL17RE,IL18R1,IL18RAP,IL1A,IL1RL1,IL20RB,IL22RA1,IL2RG,IL3RA,IL4R,IL6ST,IL7R,JAK2,KDR,MAP2K4,MAP3K10,MAP3K11,MAPK11,MYC,PDGFB,PTPN2,RAC1,RALA,RALB,RAP1B,RASD1,RRAS,RRAS2,SOCS1,SOCS2,SOCS3,SRC,STAT3,TGFA,VEGFA
Small Cell Lung Cancer Signaling	4.25	Up	ABL1,AKT1,AKT2,APAF1,BIRC2,CCND1,CCND3,CCNE2,CHUK,E2F2,E2F3,E2F4,E2F5,E2F6,HDAC1,HDAC6,HDAC7,HDAC9,IKBKB,IKBKE,MAX,MYC,NFKB1,NFKB2,NFKBIA,NFKBIE,PIK3C2B,PIK3R1,PIK3R3,PTEN,PTGS2,RELA,RELB,SIN3A,TRAF1,TRAF2,TRAF4,TRAF6
Hepatic Cholestasis	4.25	Up	ABCC3,ADCY2,ADCY4,ADCY6,ADCY7,CHUK,CLCF1,CXCL8,CYP3A5,GCGR,GUCY1A1,HSD3B7,IKBKB,IKBKE,IL11,IL12A,IL15,IL17C,IL18RAP,IL1A,IL1RAP,IL1RL1,IL1RN,IL36A,IL36G,IL6,IRAK1,IRAK2,IRAK3,IRAK4,JUN,LIF,MAP2K4,MAP3K14,MYD88,NFKB1,NFKB2,NFKBIA,NFKBIE,NR1H2,PRKAG1,PRKAR2B,PRKCE,PRKCQ,RARA,RELA,RELB,SLC4A2,SLCO1B3,SLCO3A1,SREBF1,TGFB3,TIRAP,TJP2,TNF,TNFRSF1A,TNFRSF1B,TNFSF10,TNFSF11,TNFSF13,TNFSF13B,TNFSF14,TRAF2…
ERK/MAPK Signaling	4.17	Up	ARAF,ATF4,BCAR1,CREB1,CREB3,CREB3L1,CREBBP,CRK,DUSP2,DUSP6,EIF4E,ELF1,ELF2,ELF3,ELF4,ELK1,ETS2,FOS,GRB2,H3-3A/H3-3B,ITGA10,ITGA3,ITGA5,ITGB2,ITGB4,ITGB7,MKNK1,MKNK2,MYC,PAK4,PIK3C2B,PIK3R1,PIK3R3,PLA2G2F,PLA2G3,PLA2G4C,PPARG,PPM1J,PPP1R10,PPP1R11,PPP1R12A,PPP1R3D,PPP2CA,PPP2CB,PPP2R1B,PPP2R2A,PPP2R2C,PPP2R5A,PPP2R5B,PRKAG1,PRKAR2B,PRKCE,PTK2B,PTPA,RAC1,RALA,RALB,RAP1B,RAPGEF3,RASD1,RRAS,RRAS2,SHC…
ID1 Signaling Pathway	4.07	Up	ACVR1B,ACVR2A,ACVRL1,AKT1,AKT2,ARAF,ATF3,BCL3,BHLHE40,BMP2,BMPR1A,BMPR2,CCND1,CDKN1A,CHRNA1,CREBBP,EGF,EGR1,EP300,FGF2,FGFR3,FGR,FOXO3,FRK,FZR1,GLI2,ID1,IGF2,IL6,LIF,LIFR,LYN,MAPK11,MMP9,MYC,NFKB1,NFKB2,PIK3C2B,PIK3R1,PIK3R3,PLXNB2,PTEN,RALA,RALB,RAP1B,RASD1,RHOC,RRAS,RRAS2,SMAD1,SMAD3,SMAD4,SRC,STAT3,STMN3,TFAP2A,TGFB3,TGM2,TNF,TNFRSF1A,TNFRSF1B,USP1,VEGFA,VEGFC,WDR48,YES1
Cholecystokinin/Gastrin-mediated Signaling	4.06	Up	BCAR1,CREM,ELK1,FOS,GNA13,GRB2,IL1A,IL1RN,IL36A,IL36G,JUN,MAP2K3,MAP2K4,MAP2K6,MAPK7,MEF2A,MEF2C,MEF2D,PLCB3,PRKCE,PRKCQ,PTGS2,PTK2B,RAC1,RALA,RALB,RAP1B,RASD1,RHOB,RHOC,RHOF,RHOG,RHOH,RHOT1,RHOV,RND1,RND3,ROCK1,RRAS,RRAS2,SHC1,SOS1,SRC,TNF
3-phosphoinositide Biosynthesis	4.06	Up	ACP5,ALPL,CA3,CDC25B,DOT1L,DUSP10,DUSP11,DUSP12,DUSP16,DUSP2,DUSP5,DUSP6,DUSP8,ENPP1,INPPL1,ITPK1,MTMR4,MTMR8,NOCT,PI4K2A,PI4K2B,PI4KB,PIK3C2B,PIK3R1,PIK3R3,PIKFYVE,PIP4K2C,PIP5K1A,PIP5K1C,PLPP6,PPFIA1,PPFIA3,PPM1J,PPM1K,PPP1R10,PPP1R11,PPP1R12A,PPP1R12C,PPP1R13B,PPP1R3D,PPP1R8,PPP2CA,PPP2CB,PPP2R1B,PPP2R2A,PPP2R2C,PPP2R5A,PPP2R5B,PPP3CC,PPP3R1,PPTC7,PTEN,PTPA,PTPN1,PTPN12,PTPN2,PTPN23,PTPRH,PTPR…
Ceramide Signaling	4.04	Up	AKT1,AKT2,CNKSR1,FOS,JUN,MAP2K4,MAP3K1,NFKB1,NFKB2,PIK3C2B,PIK3R1,PIK3R3,PPM1J,PPP2CA,PPP2CB,PPP2R1B,PPP2R2A,PPP2R2C,PPP2R5A,PPP2R5B,PTPA,RALA,RALB,RAP1B,RASD1,RELA,RELB,RRAS,RRAS2,S1PR2,SMPD1,SMPD3,SPHK1,TNF,TNFRSF1A,TNFRSF1B
Sphingosine-1-phosphate Signaling	3.97	Up	ADCY2,ADCY4,ADCY6,ADCY7,AKT1,AKT2,ASAH2,ASAH2B,CASP1,CASP10,CASP2,CASP3,CASP4,CASP5,CASP7,CASP8,GNA13,GNAI1,GNAI2,GNAI3,GUCY1A1,PDGFB,PDIA3,PIK3C2B,PIK3R1,PIK3R3,PLCB3,PLCD3,PLCL1,PTK2B,RAC1,RHOB,RHOC,RHOF,RHOG,RHOH,RHOT1,RHOV,RND1,RND3,S1PR2,SMPD1,SMPD3,SPHK1
Th1 and Th2 Activation Pathway	3.96	Up	ACVR1B,ACVR2A,APH1A,BMPR2,CCR1,CD274,CD3E,CD40,CRLF2,DLL4,GATA3,GRB2,HLA-A,HLA-B,HLA-DMA,HLA-DOB,HLA-DRA,ICAM1,ICOSLG/LOC102723996,IFNGR1,IFNGR2,IL10,IL10RA,IL10RB,IL12A,IL18R1,IL1RL1,IL27,IL2RG,IL4R,IL6,IRF1,ITGB2,JAG1,JAK1,JAK2,JAK3,JUN,LGALS9,MAP2K6,NCSTN,NFIL3,NFKB1,NOTCH2,PIK3C2B,PIK3R1,PIK3R3,PRKCQ,PSEN1,PSEN2,RUNX3,SOCS1,SOCS3,STAT1,STAT3,STAT5A,STAT6,TNFSF11
Oncostatin M Signaling	3.89	Up	ELK1,EPAS1,GRB2,IL6ST,JAK1,JAK2,JAK3,MMP1,MMP13,OSMR,RALA,RALB,RAP1B,RASD1,RRAS,RRAS2,SHC1,SOS1,STAT1,STAT3,STAT5A
TGF-Œ≤ Signaling	3.87	Up	ACVR1B,ACVR2A,BMP2,BMPR1A,BMPR2,CREBBP,EP300,FOS,GRB2,HDAC1,INHBA,IRF7,JUN,MAP2K3,MAP2K4,MAP2K6,MAPK11,RALA,RALB,RAP1B,RASD1,RNF111,RRAS,RRAS2,RUNX3,SERPINE1,SMAD1,SMAD3,SMAD4,SMAD7,SMURF1,SOS1,TAB1,TFE3,TGFB3,TGIF1,TRAF6
HGF Signaling	3.87	Up	AKT1,AKT2,CCND1,CDKN1A,ELF1,ELF2,ELF3,ELF4,ELK1,ETS2,FOS,GAB1,GRB2,IL6,ITGA10,ITGA3,ITGA5,ITGB2,ITGB4,ITGB7,JUN,MAP2K4,MAP2K7,MAP3K1,MAP3K10,MAP3K11,MAP3K13,MAP3K14,MAP3K5,MAP3K6,MAP3K8,MET,PIK3C2B,PIK3R1,PIK3R3,PRKCE,PRKCQ,PTGS2,RAC1,RALA,RALB,RAP1B,RASD1,RRAS,RRAS2,SOS1,STAT3
Leukocyte Extravasation Signaling	3.82	Up	ABL1,ACTB,ACTG1,ACTN4,ARHGAP1,ARHGAP12,BCAR1,CD44,CLDN1,CLDN12,CLDN14,CLDN23,CLDN4,CLDN7,CRK,CTNNA1,CTNNA3,CTNND1,CTTN,CYBA,F11R,GNAI1,GNAI2,GNAI3,ICAM1,ITGA3,ITGB2,MAP2K4,MAPK11,MMP1,MMP13,MMP14,MMP15,MMP17,MMP19,MMP25,MMP28,MMP9,NCF1,NCF4,NOX1,PECAM1,PIK3C2B,PIK3R1,PIK3R3,PRKCE,PRKCQ,PTK2B,RAC1,RAP1B,RAPGEF3,RASSF5,RHOH,ROCK1,SIPA1,SRC,TIMP1,TIMP2,VASP,VCAM1,VCL,WASL,WIPF1
Hypoxia Signaling in the Cardiovascular System	3.79	Up	AKT1,ATF4,COPS5,CREB1,CREB3,CREB3L1,CREBBP,EDN1,EP300,HSP90B1,JUN,NFKBIA,NFKBIE,NOS3,P4HB,PTEN,SUMO1,UBE2B,UBE2D3,UBE2E1,UBE2E2,UBE2F,UBE2J1,UBE2L3,UBE2L6,UBE2O,UBE2Q1,UBE2R2,UBE2W,UBE2Z,VEGFA
CDK5 Signaling	3.76	Up	ABL1,ADCY2,ADCY4,ADCY6,ADCY7,CACNA1A,CAPN1,EGR1,GNAS,GUCY1A1,ITGA3,LAMA1,LAMA3,LAMA5,LAMB1,LAMB3,LAMC1,LAMC2,MAPK11,MAPK6,MAPK7,PPM1J,PPP1R10,PPP1R11,PPP1R12A,PPP1R3D,PPP2CA,PPP2CB,PPP2R1B,PPP2R2A,PPP2R2C,PPP2R5A,PPP2R5B,PRKAG1,PRKAR2B,PTPA,RALA,RALB,RAP1B,RASD1,RRAS,RRAS2
Endothelin-1 Signaling	3.76	Up	ABHD3,ADCY2,ADCY4,ADCY6,ADCY7,ARAF,CASP1,CASP10,CASP2,CASP3,CASP4,CASP5,CASP7,CASP8,ECE1,EDN1,EDNRA,FOS,GAB1,GNA13,GNA14,GNAI1,GNAI2,GNAI3,GNAS,GRB2,GUCY1A1,HMOX1,JUN,MAPK11,MAPK6,MAPK7,MYC,NOS2,NOS3,NPR1,PDIA3,PIK3C2B,PIK3R1,PIK3R3,PLA2G2F,PLA2G3,PLA2G4C,PLAAT2,PLAAT4,PLCB3,PLCD3,PLCL1,PLD3,PNPLA2,PRKCE,PRKCQ,PTGS1,PTGS2,RALA,RALB,RAP1B,RASD1,RRAS,RRAS2,SHC1,SOS1,SRC
Ephrin Receptor Signaling	3.74	Up	ABL1,ACTR3,ADAM10,AKT1,AKT2,ANGPT1,ARPC2,ARPC5,ARPC5L,ATF4,AXIN1,BCAR1,CFL1,CFL2,CREB1,CREB3,CREB3L1,CREBBP,CRK,DOK1,EFNA1,EGF,EPHA1,EPHA2,EPHA7,EPHB3,GNA13,GNA14,GNAI1,GNAI2,GNAI3,GNAS,GNG5,GRB2,GRIN3A,GRINA,ITGA10,ITGA3,ITGA5,ITGB2,ITGB4,ITGB7,JAK2,MAP3K14,NCK1,PAK4,PDGFB,RAC1,RALA,RALB,RAP1B,RASD1,RGS3,ROCK1,RRAS,RRAS2,SHC1,SORBS1,SOS1,SRC,STAT3,VEGFA,VEGFC,WASL,WIPF1
Necroptosis Signaling Pathway	3.74	Up	AXL,BIRC2,BIRC3,CAMK2D,CAPN1,CAPN3,CAPN5,CASP1,CASP10,CASP8,CFLAR,CHUK,CYLD,DNM1L,EIF2AK2,FADD,FAS,GLUD1,IFNB1,IKBKB,IRF3,IRF9,JAK1,MLKL,PELI1,PLA2G2F,PLA2G3,PLA2G4C,PPP3CC,PPP3R1,RBCK1,RIPK1,RIPK3,RNF31,STAT1,STAT2,TAB1,TAB2,TICAM1,TIMM23B,TIMM44,TLR3,TNF,TNFRSF10A,TNFRSF1A,TNFRSF1B,TNFSF10,TNIP1,TRADD,TRAF2,UBC,VDAC2,ZBP1
IL-9 Signaling	3.72	Up	BCL3,IL2RG,IRS2,JAK1,JAK3,NFKB1,NFKB2,PIK3C2B,PIK3R1,PIK3R3,RELA,RELB,SOCS2,SOCS3,STAT1,STAT3,STAT5A,TNF
Cell Cycle Regulation by BTG Family Proteins	3.72	Up	BTG1,CCND1,CCNE2,E2F2,E2F3,E2F4,E2F5,E2F6,E2F7,NOCT,PPM1J,PPP2CA,PPP2CB,PPP2R1B,PPP2R2A,PPP2R2C,PPP2R5A,PPP2R5B,PTPA
Superpathway of Inositol Phosphate Compounds	3.72	Up	ACP5,ALPL,CA3,CDC25B,DOT1L,DUSP10,DUSP11,DUSP12,DUSP16,DUSP2,DUSP5,DUSP6,DUSP8,ENPP1,INPPL1,IPPK,ITPK1,ITPKA,ITPKC,MTMR4,MTMR8,NOCT,PI4K2A,PI4K2B,PI4KB,PIK3C2B,PIK3R1,PIK3R3,PIKFYVE,PIP4K2C,PIP4P2,PIP5K1A,PIP5K1C,PLCB3,PLCD3,PLPP6,PPFIA1,PPFIA3,PPM1J,PPM1K,PPP1R10,PPP1R11,PPP1R12A,PPP1R12C,PPP1R13B,PPP1R3D,PPP1R8,PPP2CA,PPP2CB,PPP2R1B,PPP2R2A,PPP2R2C,PPP2R5A,PPP2R5B,PPP3CC,PPP3R1,PPTC7,PTEN,PTPA,…
GNRH Signaling	3.71	Up	ADCY2,ADCY4,ADCY6,ADCY7,ATF4,CACNA1A,CACNA1I,CACNB1,CACNG8,CALM1 (includes others),CAMK2D,CREB1,CREB3,CREB3L1,CREBBP,EGR1,ELK1,FOS,GNA14,GNAI1,GNAI2,GNAI3,GNAS,GNG5,GRB2,GUCY1A1,HBEGF,JUN,MAP2K3,MAP2K4,MAP2K6,MAP2K7,MAP3K1,MAP3K10,MAP3K11,MAP3K13,MAP3K14,MAP3K5,MAP3K6,MAP3K8,MAPK11,MAPK7,NFKB1,NFKB2,PAK4,PLCB3,PRKAG1,PRKAR2B,PRKCE,PRKCQ,PTK2B,RAC1,RALA,RALB,RAP1B,RASD1,RELA,RELB,RRAS,RRAS2,SOS1,S…
Role of IL-17A in Arthritis	3.69	Up	CCL20,CCL5,CXCL3,CXCL5,CXCL8,IL17RA,IL17RC,MAP2K3,MAP2K4,MAP2K6,MAPK11,MAPKAPK2,MMP1,MMP13,NFKB1,NFKB2,NFKBIA,NFKBIE,NOS2,PIK3C2B,PIK3R1,PIK3R3,PTGS2,RELA,RELB
ERK5 Signaling	3.64	Up	AKT1,ATF4,CREB1,CREB3,CREB3L1,CREBBP,EGF,ELK4,FOS,FOSL1,FOXO3,GAB1,GNA13,IL6ST,LIF,MAP3K8,MAPK7,MEF2A,MEF2C,MEF2D,MYC,RALA,RALB,RAP1B,RASD1,RRAS,RRAS2,SGK1,SRC,YWHAZ
Clathrin-mediated Endocytosis Signaling	3.62	Up	AAK1,ACTB,ACTG1,ACTR3,AP1B1,AP1G2,AP1M1,AP3B1,AP3D1,AP4B1,AP5B1,AP5S1,AP5Z1,APOD,APOL1,ARF6,ARPC2,ARPC5,ARPC5L,CD2AP,CLU,CTTN,DNM1L,DNM2,EGF,EPS15,FGF11,FGF13,FGF2,FGF5,GAK,GRB2,HGS,ITGA5,ITGB2,ITGB4,ITGB7,LDLR,LYZ,MET,NUMB,PDGFB,PICALM,PIK3C2B,PIK3R1,PIK3R3,PIP5K1C,PPP3CC,PPP3R1,RAB11A,RAB5A,RAB5C,RAC1,SAA4,SH3GL1,SH3GLB1,SH3GLB2,SH3KBP1,SNX9,SRC,SYNJ1,TF,UBC,VEGFA,VEGFC,WASL
Axonal Guidance Signaling	3.62	Up	ABL1,ABLIM3,ACE,ACE2,ACTR3,ADAM10,ADAM15,ADAM17,ADAM28,ADAM8,ADAMDEC1,ADAMTS1,ADAMTS14,ADAMTS17,ADAMTS3,ADAMTS6,AKT1,AKT2,ARHGEF11,ARHGEF6,ARPC2,ARPC5,ARPC5L,BCAR1,BMP1,BMP2,BMP3,CFL1,CFL2,CHMP1A,COPS5,CRK,EFNA1,EGF,EIF4E,EPHA1,EPHA2,EPHA7,EPHB3,ERAP2,FARP2,FES,FZD5,FZD8,GLI2,GLIS2,GNA13,GNA14,GNAI1,GNAI2,GNAI3,GNAS,GNG5,GRB2,ITGA10,ITGA3,ITGA5,ITGB2,ITGB4,ITGB7,KCNJ12,L1CAM,LINGO1,LNPEP,MET,MICA…
Germ Cell-Sertoli Cell Junction Signaling	3.56	Up	ACTB,ACTG1,ACTN4,AKT1,AXIN1,BCAR1,CFL1,CFL2,CTNNA1,CTNND1,ITGA3,KEAP1,MAP2K3,MAP2K4,MAP2K6,MAP2K7,MAP3K1,MAP3K10,MAP3K11,MAP3K13,MAP3K14,MAP3K5,MAP3K6,MAP3K8,NECTIN2,PAK4,PIK3C2B,PIK3R1,PIK3R3,RAB8B,RAC1,RALA,RALB,RAP1B,RASD1,RHOB,RHOC,RHOF,RHOG,RHOH,RHOT1,RHOV,RND1,RND3,RRAS,RRAS2,SORBS1,SRC,TGFB3,TJP1,TNF,TNFRSF1A,TUBB2A,VCL,WASL,ZYX
Role of CHK Proteins in Cell Cycle Checkpoint Control	3.55	Up	ATMIN,CDKN1A,CHEK2,CLSPN,E2F2,E2F3,E2F4,E2F5,E2F6,E2F7,HUS1,NBN,PPM1J,PPP2CA,PPP2CB,PPP2R1B,PPP2R2A,PPP2R2C,PPP2R5A,PPP2R5B,PTPA,RFC1,RFC2,TLK1,TLK2
Cardiac Hypertrophy Signaling	3.55	Up	ADCY2,ADCY4,ADCY6,ADCY7,ADRB2,ADSS2,AKT1,CACNA1A,CACNB1,CACNG8,CALM1 (includes others),CREB1,CREBBP,EIF2B1,EIF4E,ELK1,EP300,GATA4,GNA13,GNA14,GNAI1,GNAI2,GNAI3,GNAS,GNG5,GRB2,GUCY1A1,IL6,JUN,MAP2K3,MAP2K4,MAP2K6,MAP2K7,MAP3K1,MAP3K10,MAP3K11,MAP3K13,MAP3K14,MAP3K5,MAP3K6,MAP3K8,MAPK11,MAPKAPK2,MEF2A,MEF2C,MEF2D,MYL12A,MYL12B,PDIA3,PIK3C2B,PIK3R1,PIK3R3,PLCB3,PLCD3,PLCL1,PPP3CC,PPP3R1,PRKAG1,PRKAR…
BEX2 Signaling Pathway	3.52	Up	AKT1,AKT2,BAK1,BBC3,CCND1,CDKN1A,JUN,LMO2,MAP2,MAP2K4,NFKB1,NFKB2,NFKBIA,PLXNC1,PPM1J,PPP2CA,PPP2CB,PPP2R1B,PPP2R2A,PPP2R2C,PPP2R5A,PPP2R5B,PTEN,PTPA,RELA,RELB,SPP1,STAT3,TCF4,TCF7L2,VEGFA,VEGFC
Sertoli Cell-Sertoli Cell Junction Signaling	3.5	Up	ACTB,ACTG1,ACTN4,AKT1,AKT2,AXIN1,BCAR1,CLDN1,CLDN12,CLDN14,CLDN23,CLDN4,CLDN7,CTNNA1,ELK1,F11R,GUCY1A1,ITGA10,ITGA3,ITGA5,ITGB2,ITGB4,ITGB7,JUN,KEAP1,MAP2K3,MAP2K4,MAP2K7,MAP3K1,MAP3K10,MAP3K11,MAP3K13,MAP3K14,MAP3K5,MAP3K6,MAP3K8,MAPK11,NECTIN1,NECTIN2,NOS2,NOS3,OCLN,PRKAG1,PRKAR2B,PTEN,RAB8B,RAC1,RALA,RALB,RAP1B,RASD1,RRAS,RRAS2,SORBS1,SRC,SYMPK,TGFB3,TJAP1,TJP1,TJP2,TJP3,TNF,TNFRSF1A,TUBB2A,VCL
Actin Nucleation by ARP-WASP Complex	3.49	Up	ACTR3,ARPC2,ARPC5,ARPC5L,GRB2,ITGA10,ITGA3,ITGA5,ITGB2,ITGB4,ITGB7,NCK1,PPP1R12A,PPP1R12C,RAC1,RALA,RALB,RAP1B,RASD1,RHOB,RHOC,RHOF,RHOG,RHOH,RHOT1,RHOV,RND1,RND3,ROCK1,RRAS,RRAS2,SOS1,VASP,WASL,WIPF1
D-myo-inositol (1,4,5,6)-Tetrakisphosphate Biosynthesis	3.49	Up	ACP5,ALPL,CA3,CDC25B,DOT1L,DUSP10,DUSP11,DUSP12,DUSP16,DUSP2,DUSP5,DUSP6,DUSP8,ENPP1,INPPL1,ITPK1,MTMR4,MTMR8,NOCT,PIKFYVE,PLPP6,PPFIA1,PPFIA3,PPM1J,PPM1K,PPP1R10,PPP1R11,PPP1R12A,PPP1R12C,PPP1R13B,PPP1R3D,PPP1R8,PPP2CA,PPP2CB,PPP2R1B,PPP2R2A,PPP2R2C,PPP2R5A,PPP2R5B,PPP3CC,PPP3R1,PPTC7,PTEN,PTPA,PTPN1,PTPN12,PTPN2,PTPN23,PTPRH,PTPRJ,PTPRO,PXYLP1,RNGTT,SET,SOCS3,SSH2,SYNJ1,THTPA
D-myo-inositol (3,4,5,6)-tetrakisphosphate Biosynthesis	3.49	Up	ACP5,ALPL,CA3,CDC25B,DOT1L,DUSP10,DUSP11,DUSP12,DUSP16,DUSP2,DUSP5,DUSP6,DUSP8,ENPP1,INPPL1,ITPK1,MTMR4,MTMR8,NOCT,PIKFYVE,PLPP6,PPFIA1,PPFIA3,PPM1J,PPM1K,PPP1R10,PPP1R11,PPP1R12A,PPP1R12C,PPP1R13B,PPP1R3D,PPP1R8,PPP2CA,PPP2CB,PPP2R1B,PPP2R2A,PPP2R2C,PPP2R5A,PPP2R5B,PPP3CC,PPP3R1,PPTC7,PTEN,PTPA,PTPN1,PTPN12,PTPN2,PTPN23,PTPRH,PTPRJ,PTPRO,PXYLP1,RNGTT,SET,SOCS3,SSH2,SYNJ1,THTPA
HIPPO signaling	3.48	Up	AJUBA,CD44,DLG2,DLG3,LATS1,LATS2,LLGL1,PPM1J,PPP1R10,PPP1R11,PPP1R12A,PPP1R3D,PPP2CA,PPP2CB,PPP2R1B,PPP2R2A,PPP2R2C,PPP2R5A,PPP2R5B,PTPA,RASSF6,SAV1,SMAD1,SMAD3,SMAD4,STK3,STK4,TEAD3,TJP2,TP53BP2,WWTR1,YAP1,YWHAZ
Mouse Embryonic Stem Cell Pluripotency	3.47	Up	AKT1,AKT2,AXIN1,BMPR1A,BMPR2,CREBBP,FZD5,FZD8,GRB2,ID1,ID2,ID3,ID4,IL6ST,JAK1,JAK2,JAK3,LIF,LIFR,MAPK11,MYC,PIK3C2B,PIK3R1,PIK3R3,RALA,RALB,RAP1B,RASD1,RRAS,RRAS2,SMAD1,SMAD4,SOS1,STAT3,TAB1,TCF4,TCF7L2,XIAP
D-myo-inositol-5-phosphate Metabolism	3.47	Up	ACP5,ALPL,CA3,CDC25B,DOT1L,DUSP10,DUSP11,DUSP12,DUSP16,DUSP2,DUSP5,DUSP6,DUSP8,ENPP1,INPPL1,ITPK1,MTMR4,MTMR8,NOCT,PIKFYVE,PIP4K2C,PIP4P2,PLCB3,PLCD3,PLPP6,PPFIA1,PPFIA3,PPM1J,PPM1K,PPP1R10,PPP1R11,PPP1R12A,PPP1R12C,PPP1R13B,PPP1R3D,PPP1R8,PPP2CA,PPP2CB,PPP2R1B,PPP2R2A,PPP2R2C,PPP2R5A,PPP2R5B,PPP3CC,PPP3R1,PPTC7,PTEN,PTPA,PTPN1,PTPN12,PTPN2,PTPN23,PTPRH,PTPRJ,PTPRO,PXYLP1,RNGTT,SET,SOCS3,SSH2,SYN…
Regulation of the Epithelial-Mesenchymal Transition Pathway	3.47	Up	ADAM17,AKT1,AKT2,APH1A,ARAF,AXIN1,EGF,EGR1,FGF11,FGF13,FGF2,FGF5,FGFR3,FRS2,FZD5,FZD8,GAB1,GRB2,ID2,JAG1,JAK1,JAK2,JAK3,LOX,MAML1,MAP2K3,MAP2K4,MAP2K6,MAP2K7,MET,MMP9,NCSTN,NFKB1,NFKB2,NOTCH2,PARD6B,PIK3C2B,PIK3R1,PIK3R3,PSEN1,PSEN2,RALA,RALB,RAP1B,RASD1,RELA,RELB,RRAS,RRAS2,SMAD3,SMAD4,SMURF1,SNAI1,SOS1,STAT3,TCF4,TCF7L2,TGFB3,TWIST2,WNT10A,WNT4,ZEB1
CSDE1 Signaling Pathway	3.39	Up	AKT1,AKT2,APAF1,CCND3,CDK11A,CDK11B,CSDE1,CTTN,DCP1A,DCP2,FOS,FUS,HNRNPC,HNRNPD,MYC,PAIP1,PIWIL4,PTBP1,PTEN,PUM1,RAC1,SDC4,SNAI1,SYNCRIP
Human Embryonic Stem Cell Pluripotency	3.33	Up	ACVR2A,ACVRL1,AKT1,AKT2,ARAF,AXIN1,BMP1,BMP2,BMP3,BMPR1A,BMPR2,ELK1,FGF2,FGFR3,FOXO1,FUT4,FZD5,FZD8,GRB2,HSP90B1,ID1,ID2,ID3,ID4,INHBA,JAK1,JAK2,JAK3,KLF4,LIF,LIFR,MAP2K3,MAP2K4,MAP2K6,MAP2K7,MYC,NFYC,PDGFB,PIK3C2B,PIK3R1,PIK3R3,PRKCE,PRKCQ,RALA,RALB,RAP1B,RASD1,RIF1,RRAS,RRAS2,S1PR2,SALL4,SMAD1,SMAD3,SMAD4,SMAD7,SOS1,SPHK1,STAT3,TBX3,TGFB3,WNT10A,WNT4
Inflammasome pathway	3.33	Up	AIM2,CASP1,CASP5,CASP8,CTSB,MYD88,NAIP,NEK7,NFKB1,NFKB2,NOD2,PANX1
GADD45 Signaling	3.3	Up	ACVR1B,ACVR2A,CCND1,CCND3,CCNE2,CDKN1A,FOXO3,GADD45A,GADD45B,MAP2K3,MAP2K4,MAP2K6,MAP2K7,MAPK11,MYC,NFKB1,NFKB2,POU2F1,RELA,RELB,SMAD3,SMAD4,TGFB3,TNF,ZNF350
Neuregulin Signaling	3.29	Up	ADAM17,AKT1,AKT2,AREG,BTC,CRK,EGF,ELK1,ERBB3,ERBIN,EREG,GRB2,GRB7,HBEGF,HSP90B1,ITGA10,ITGA3,ITGA5,ITGB2,ITGB4,ITGB7,MYC,NRG1,NRG2,PIK3R1,PIK3R3,PRKCE,PRKCQ,PSEN1,PTEN,RALA,RALB,RAP1B,RASD1,RRAS,RRAS2,SHC1,SOS1,SRC,STAT5A,TGFA
IL-12 Signaling and Production in Macrophages	3.27	Up	AKT1,AKT2,ALOX12,APOD,APOL1,CD40,CEBPB,CHUK,CLU,EP300,FOS,IFNGR1,IKBKB,IKBKE,IL10,IL12A,IRF1,JUN,LYZ,MAP2K4,MAP3K8,MAPK11,MST1R,MYD88,NCOA1,NFKB1,NFKB2,NFKBIA,NFKBIE,NOS2,PIK3C2B,PIK3R1,PIK3R3,PPARG,PRKCE,PRKCQ,RELA,RELB,SAA4,STAT1,STAT6,TGFB3,TLR2,TNF,TRAF6,ZNF668
3-phosphoinositide Degradation	3.22	Up	ACP5,ALPL,CA3,CDC25B,DOT1L,DUSP10,DUSP11,DUSP12,DUSP16,DUSP2,DUSP5,DUSP6,DUSP8,ENPP1,INPPL1,ITPK1,MTMR3,MTMR4,MTMR8,NOCT,PIKFYVE,PIP4P2,PLPP6,PPFIA1,PPFIA3,PPM1J,PPM1K,PPP1R10,PPP1R11,PPP1R12A,PPP1R12C,PPP1R13B,PPP1R3D,PPP1R8,PPP2CA,PPP2CB,PPP2R1B,PPP2R2A,PPP2R2C,PPP2R5A,PPP2R5B,PPP3CC,PPP3R1,PPTC7,PTEN,PTPA,PTPN1,PTPN12,PTPN2,PTPN23,PTPRH,PTPRJ,PTPRO,PXYLP1,RNGTT,SET,SOCS3,SSH2,SYNJ1,THTPA
NF-Œ∫B Activation by Viruses	3.22	Up	AKT1,AKT2,CHUK,EIF2AK2,IKBKB,IKBKE,ITGA3,MAP3K1,MAP3K14,NFKB1,NFKB2,NFKBIA,NFKBIE,PIK3C2B,PIK3R1,PIK3R3,PRKCE,PRKCQ,RALA,RALB,RAP1B,RASD1,RELA,RELB,RIPK1,RRAS,RRAS2,TBP,TNFRSF14,TRAF2
IL-17A Signaling in Gastric Cells	3.22	Up	CCL20,CCL5,CXCL10,CXCL11,CXCL8,FOS,IL17RA,IL17RC,JUN,MAP2K4,MAPK11,NFKB1,RELA,TNF
Role of JAK1, JAK2 and TYK2 in Interferon Signaling	3.22	Up	IFNB1,IFNGR1,IFNGR2,JAK1,JAK2,NFKB1,NFKB2,PTPN2,RELA,RELB,SOCS1,STAT1,STAT2,STAT3
PD-1, PD-L1 cancer immunotherapy pathway	3.21	Up	AKT1,AKT2,B2M,CD274,CSK,ELK1,HLA-A,HLA-B,HLA-C,HLA-DMA,HLA-DOB,HLA-DRA,HLA-E,HLA-F,HLA-G,IFNGR1,IFNGR2,IL12A,IL2RG,JAK1,JAK2,JAK3,LATS1,LATS2,MR1,PDCD1LG2,PIK3C2B,PIK3R1,PIK3R3,PRKCQ,PTEN,SMAD3,STAT5A,TGFB3,TNF,TNFRSF1A,TNFRSF1B,YAP1
Role Of Osteoblasts In Rheumatoid Arthritis Signaling Pathway	3.17	Up	ACVR2A,ACVRL1,AKT1,AKT2,ALPL,AXIN1,BMP2,BMP3,BMPR1A,BMPR2,CLCF1,COL1A1,CSNK1A1,CSNK1G1,CTSA,CTSB,CTSC,CTSE,CTSO,CTSS,CXCL8,DKK1,FZD5,FZD8,IL11,IL12A,IL15,IL17C,IL1A,IL36A,IL36G,IL6,IL6ST,JAK1,JAK2,JAK3,LIF,MMP1,MMP13,MMP14,MMP15,MMP17,MMP19,MMP25,MMP28,MMP9,PIK3C2B,PIK3R1,PIK3R3,PTGS2,SFRP1,SMAD1,SMAD4,SMURF1,SRC,STAT1,STAT2,STAT3,STAT5A,STAT6,TCF4,TCF7L2,TGFB3,TNF,TNFSF10,TNFSF11,TNFSF13,TNFSF13…
Caveolar-mediated Endocytosis Signaling	3.17	Up	ABL1,ACTB,ACTG1,ARCN1,B2M,CD55,COPB1,COPG1,DNM2,EGF,FLNB,FLOT1,HLA-A,HLA-B,HLA-C,HLA-E,HLA-F,HLA-G,ITGA10,ITGA3,ITGA5,ITGB2,ITGB4,ITGB7,MR1,PTPN1,RAB5A,RAB5C,SRC
Pyroptosis Signaling Pathway	3.16	Up	AIM2,CASP1,CASP3,CASP4,CASP5,CASP8,FOXO3,GBP1,GBP2,GBP3,GBP4,GBP5,GBP7,GSDMB,GSDMD,GZMA,IL1A,IRF2,MAPK11,NAIP,NEK7,NFKB1,NFKB2,NLRP10,PANX1,PRKAG1,PRKAR2B,TLR2,TLR3,TLR7,TNF,TNFRSF1A,TNFRSF1B,TXNIP
ERBB Signaling	3.16	Up	AKT1,AREG,BTC,EGF,ELK1,ERBB3,EREG,FOS,FOXO1,GRB2,HBEGF,JUN,MAP2K3,MAP2K4,MAP2K6,MAPK11,NCK1,NRG1,NRG2,PAK4,PIK3C2B,PIK3R1,PIK3R3,PRKCE,PRKCQ,RALA,RALB,RAP1B,RASD1,RRAS,RRAS2,SHC1,SOS1,TGFA
Reelin Signaling in Neurons	3.13	Up	ACTR3,AKT1,AKT2,ARHGEF1,ARHGEF10L,ARHGEF11,ARHGEF16,ARHGEF18,ARHGEF2,ARHGEF3,ARHGEF37,ARHGEF38,ARHGEF40,ARHGEF5,ARHGEF6,ARPC2,ARPC5,ARPC5L,CAMK2D,CFL1,CNR1,CRK,FGR,FRK,GRIN3A,GRINA,ITGA3,ITGA5,LYN,MAP2K3,MAP2K4,MAP2K6,MAP2K7,MAP3K10,MAP3K11,MAPK8IP2,NDEL1,PIK3C2B,PIK3R1,PIK3R3,RAC1,RAP1B,SRC,VLDLR,WASL,YES1
ERB2-ERBB3 Signaling	3.13	Up	AKT1,CCND1,ELK1,ERBB3,FOXO1,GRB2,JAK3,JUN,MYC,NRG1,NRG2,PIK3C2B,PIK3R1,PIK3R3,PTEN,RALA,RALB,RAP1B,RASD1,RRAS,RRAS2,SHC1,SOS1,SP1,STAT3,STAT5A
IL-3 Signaling	3.13	Up	AKT1,AKT2,ELK1,FOS,FOXO1,GRB2,IL3RA,JAK1,JAK2,JUN,PIK3C2B,PIK3R1,PIK3R3,PPP3CC,PPP3R1,PRKCE,PRKCQ,RAC1,RALA,RALB,RAP1B,RASD1,RRAS,RRAS2,SHC1,SOS1,STAT1,STAT3,STAT5A,STAT6
PDGF Signaling	3.04	Up	ABL1,ABL2,CRK,EIF2AK2,ELK1,FOS,GRB2,INPPL1,JAK1,JAK2,JAK3,JUN,MAP2K4,MAP3K1,MYC,PDGFB,PIK3C2B,PIK3R1,PIK3R3,RALA,RALB,RAP1B,RASD1,RRAS,RRAS2,SHC1,SOS1,SPHK1,SRC,STAT1,STAT3,SYNJ1
Signaling by Rho Family GTPases	3.04	Up	ACTB,ACTG1,ACTR3,ARHGEF1,ARHGEF11,ARHGEF16,ARHGEF18,ARHGEF2,ARHGEF3,ARHGEF5,ARHGEF6,ARPC2,ARPC5,ARPC5L,CDC42EP1,CDC42EP2,CDC42EP3,CDC42EP4,CDC42EP5,CDH3,CDH4,CFL1,CFL2,ELK1,FOS,GNA13,GNA14,GNAI1,GNAI2,GNAI3,GNAS,GNG5,ITGA10,ITGA3,ITGA5,ITGB2,ITGB4,ITGB7,JUN,MAP2K4,MAP2K7,MAP3K10,MAP3K11,MYL12A,MYL12B,NCF1,NFKB1,NFKB2,NOX1,PAK4,PIK3C2B,PIK3R1,PIK3R3,PIKFYVE,PIP4K2C,PIP5K1A,PIP5K1C,PPP1R12A,PPP1R12…
Relaxin Signaling	3.02	Up	ADCY2,ADCY4,ADCY6,ADCY7,AKT1,AKT2,CREB1,ELK1,ENPP1,FICD,FOS,GDPD3,GNA13,GNA14,GNAI1,GNAI2,GNAI3,GNAS,GNG5,GUCY1A1,JUN,MMP9,MPPE1,NFKB1,NFKB2,NFKBIA,NFKBIE,NOS2,NOS3,NPR1,NPR3,PDE4A,PDE4B,PDE4C,PDE4D,PDE6D,PDE8A,PDE9A,PIK3C2B,PIK3R1,PIK3R3,PRKAG1,PRKAR2B,RAP1B,RELA,RELB,RXFP1,SLC39A7,SOX15,VEGFA
HOTAIR Regulatory Pathway	3.01	Up	AKT1,AKT2,ATG3,BRD4,CD44,CDKN1A,COL1A1,CREBBP,EED,EP300,FOXA1,H3-3A/H3-3B,HDAC1,ICAM1,IRF1,JARID2,KMT2C,MET,MMP1,MMP13,MMP14,MMP15,MMP17,MMP19,MMP25,MMP28,MMP9,MRTFA,MTF2,MYC,NFKB1,NFKB2,NFKBIA,PIK3C2B,PIK3R1,PIK3R3,PTEN,RCOR1,RELA,RELB,RHOC,ROCK1,SETDB1,SPP1,STAT3,STK38,TCF4,TCF7L2,TWIST2,WNT10A,WNT4,XIAP
Acute Myeloid Leukemia Signaling	3.01	Up	AKT1,AKT2,ARAF,CCNA1,CCND1,CSF3R,FLT3LG,GRB2,MAP2K3,MAP2K4,MAP2K6,MAP2K7,MYC,NFKB1,NFKB2,PIK3C2B,PIK3R1,PIK3R3,PML,RALA,RALB,RAP1B,RARA,RASD1,RELA,RELB,RRAS,RRAS2,SOS1,STAT3,STAT5A,TCF4,TCF7L2
Crosstalk between Dendritic Cells and Natural Killer Cells	3.01	Up	ACTB,ACTG1,CAMK2D,CD40,CD83,FAS,HLA-A,HLA-B,HLA-C,HLA-DRA,HLA-E,HLA-F,HLA-G,IFNB1,IL12A,IL15,IL15RA,IL2RG,IL3RA,IL6,LTBR,MICB,NECTIN2,NFKB1,NFKB2,RELA,RELB,TLN2,TLR3,TLR7,TNF,TNFRSF1B,TNFSF10
BMP signaling pathway	3.01	Up	ACVR2A,ACVRL1,BMP1,BMP2,BMP3,BMPR1A,BMPR2,CREB1,CREBBP,GRB2,JUN,MAP2K4,MAPK11,NFKB1,NFKB2,PRKAG1,PRKAR2B,RALA,RALB,RAP1B,RASD1,RELA,RELB,RRAS,RRAS2,SMAD1,SMAD4,SMAD7,SMURF1,SOS1,SOSTDC1,TAB1,XIAP
MicroRNA Biogenesis Signaling Pathway	3	Up	ABL1,ADAR,AKT1,AKT2,CSDE1,DBR1,DDX17,DDX5,DNAJA2,DROSHA,EGF,EWSR1,EXOSC10,EXOSC8,EXOSC9,FGF2,FUS,HMOX1,HNRNPD,HSP90B1,IFNB1,MAPK11,MYC,NUP160,NUP205,NUP214,NUP42,NUP50,NUP88,NUP93,NUP98,PDGFB,PIK3C2B,PIK3R1,PIK3R3,PIWIL4,PNPT1,POLR2A,POLR3D,POM121/POM121C,QKI,RALA,RALB,RAP1B,RASD1,RRAS,RRAS2,SF3A2,SMAD1,SMAD3,TGFA,TGFB3,TUT7,VEGFA,XPO5,XRN1,YAP1,ZC3H12A
Renin-Angiotensin Signaling	3	Up	ACE,ADCY2,ADCY4,ADCY6,ADCY7,CCL5,ELK1,FOS,GRB2,GUCY1A1,JAK2,JUN,MAP2K4,MAP3K1,MAPK11,NFKB1,NFKB2,NOX1,PAK4,PIK3C2B,PIK3R1,PIK3R3,PRKAG1,PRKAR2B,PRKCE,PRKCQ,PTK2B,RAC1,RALA,RALB,RAP1B,RASD1,RELA,RELB,RRAS,RRAS2,SHC1,SOS1,STAT1,STAT3,TNF
Protein Kinase A Signaling	2.99	Up	ADCY2,ADCY4,ADCY6,ADCY7,ADD3,AKAP10,AKAP12,AKAP13,AKAP17A,AKAP5,AKAP7,AKAP8,ANAPC10,ATF4,CALM1 (includes others),CAMK2D,CDC25B,CDC27,CHUK,CREB1,CREB3,CREB3L1,CREBBP,CREM,DUSP10,DUSP11,DUSP12,DUSP16,DUSP2,DUSP22,DUSP5,DUSP6,DUSP7,DUSP8,EBI3,ELK1,ENPP1,EYA1,EYA3,FICD,FLNB,GDPD3,GNA13,GNAI1,GNAI2,GNAI3,GNAS,GNG5,GUCY1A1,H1-0,H1-3,H3-3A/H3-3B,KDELR1,KDELR2,KDELR3,MAP3K1,MPPE1,MTMR3,MYL12A,MYL12B,NFAT…
Prolactin Signaling	2.99	Up	CCDC51,CEBPB,CREBBP,EP300,FOS,GRB2,IRF1,JAK2,JUN,KCNMB3,KCNU1,MYC,NMI,NR3C1,PIK3C2B,PIK3R1,PIK3R3,PRKCE,PRKCQ,RALA,RALB,RAP1B,RASD1,RRAS,RRAS2,SHC1,SOCS1,SOCS2,SOCS3,SOS1,SP1,STAT1,STAT3,STAT5A
Virus Entry via Endocytic Pathways	2.94	Up	ABL1,ACTB,ACTG1,AP1B1,AP1G2,AP1M1,AP3B1,AP3D1,AP4B1,AP5B1,AP5S1,AP5Z1,B2M,CD55,DNM2,FLNB,HLA-A,HLA-B,HLA-C,HLA-E,HLA-F,HLA-G,ITGA5,ITGB2,ITGB4,ITGB7,MR1,PIK3C2B,PIK3R1,PIK3R3,PRKCE,PRKCQ,RAC1,RALA,RALB,RAP1B,RASD1,RRAS,RRAS2,SRC
Apelin Endothelial Signaling Pathway	2.93	Up	ADCY2,ADCY4,ADCY6,ADCY7,AKT1,AKT2,ANGPT1,CALM1 (includes others),FOS,GNA13,GNA14,GNAI1,GNAI2,GNAI3,GNAS,GNG5,GUCY1A1,ICAM1,JUN,MAP2K4,MEF2A,MEF2C,MEF2D,NFKB1,NFKB2,NOS3,PIK3C2B,PIK3R1,PIK3R3,PLCB3,PRKAB1,PRKAG1,PRKCE,PRKCQ,RALA,RALB,RAP1B,RASD1,RELA,RELB,RRAS,RRAS2,SMAD3,SP1,TEK,VCAM1
Retinoic acid Mediated Apoptosis Signaling	2.92	Up	APAF1,CASP3,CASP8,CFLAR,CRABP2,FADD,IFNB1,IFNE,IRF1,PARP10,PARP11,PARP12,PARP14,PARP15,PARP3,PARP4,PARP6,PARP8,PARP9,RARA,RARG,TNFRSF10A,TNFSF10,TNKS2
Pathogenesis of Multiple Sclerosis	2.92	Up	CCL3,CCL4,CCL5,CCR1,CXCL10,CXCL11,CXCL9
Paxillin Signaling	2.92	Up	ACTB,ACTG1,ACTN4,ARF1,ARF6,ARHGEF6,BCAR1,CRK,CSK,GIT2,GRB2,ITGA10,ITGA3,ITGA5,ITGB2,ITGB4,ITGB7,MAP2K4,MAPK11,NCK1,PAK4,PIK3C2B,PIK3R1,PIK3R3,PTK2B,PTPN12,RAC1,RALA,RALB,RAP1B,RASD1,RRAS,RRAS2,SOS1,SRC,TLN2,VCL
LPS-stimulated MAPK Signaling	2.91	Up	CHUK,CREB1,ELK1,FOS,IKBKB,IKBKE,JUN,MAP2K3,MAP2K4,MAP2K6,MAP3K14,MAP3K5,MAPK11,NFKB1,NFKB2,NFKBIA,NFKBIE,PIK3C2B,PIK3R1,PIK3R3,PRKCE,PRKCQ,RAC1,RALA,RALB,RAP1B,RASD1,RELA,RELB,RRAS,RRAS2
Erythropoietin Signaling Pathway	2.89	Up	AKT1,AKT2,APAF1,BIRC2,BIRC3,CCND1,CLCF1,CXCL8,ELK1,FOS,FOXO3,GRB2,IL11,IL12A,IL15,IL17C,IL1A,IL36A,IL36G,IL6,IRS2,JAK2,JUN,LIF,NFKB1,NFKB2,NFKBIA,NFKBIE,NOS3,PIK3C2B,PIK3R1,PIK3R3,PRKCE,PRKCQ,RAC1,RALA,RALB,RAP1B,RASD1,RELA,RELB,RRAS,RRAS2,SHC1,SOS1,SRC,STAT5A,TGFB3,TNF,TNFSF10,TNFSF11,TNFSF13,TNFSF13B,TNFSF14,XIAP
Granulocyte Adhesion and Diapedesis	2.89	Up	ACKR3,ACKR4,CCL20,CCL22,CCL28,CCL3,CCL4,CCL5,CCR1,CLDN1,CLDN12,CLDN14,CLDN23,CLDN4,CLDN7,CSF3,CSF3R,CX3CL1,CXCL10,CXCL11,CXCL16,CXCL17,CXCL2,CXCL3,CXCL5,CXCL8,CXCL9,GNAI1,GNAI2,GNAI3,HRH1,ICAM1,ICAM2,IL18RAP,IL1A,IL1RAP,IL1RL1,IL1RN,IL36A,IL36G,ITGB2,MMP1,MMP13,MMP14,MMP15,MMP17,MMP19,MMP25,MMP28,MMP9,PECAM1,SDC1,SDC4,SELL,TNF,TNFRSF1A,TNFRSF1B,VCAM1
Neurotrophin/TRK Signaling	2.89	Up	AKT1,ATF4,CREB1,CREB3,CREB3L1,CREBBP,FOS,FRS2,GAB1,GRB2,JUN,MAP2K3,MAP2K4,MAP2K6,MAP2K7,MAP3K5,PIK3C2B,PIK3R1,PIK3R3,RALA,RALB,RAP1B,RASD1,RRAS,RRAS2,SHC1,SOS1,SPRY1,SPRY2
4-1BB Signaling in T Lymphocytes	2.88	Up	CHUK,IKBKB,IKBKE,JUN,MAP2K4,MAP3K14,MAP3K5,MAPK11,NFKB1,NFKB2,NFKBIA,NFKBIE,RELA,RELB,TRAF1,TRAF2
Role of IL-17F in Allergic Inflammatory Airway Diseases	2.87	Up	ATF4,CCL4,CREB1,CREB3,CREB3L1,CREBBP,CXCL10,CXCL5,CXCL8,IL11,IL17RA,IL17RC,IL6,MMP13,NFKB1,NFKB2,RELA,RELB,TRAF3IP2,TRAF6
Phagosome Maturation	2.85	Up	ATP6V1G1,B2M,BET1L,CALR,CANX,CTSA,CTSB,CTSC,CTSE,CTSO,CTSS,DCTN4,DYNC1I2,DYNC1LI2,DYNLT1,GOSR1,GOSR2,HLA-A,HLA-B,HLA-C,HLA-DRA,HLA-E,HLA-F,HLA-G,LAMP2,MR1,NAPA,NAPG,NCF1,NOX1,NSF,PIKFYVE,RAB5A,RAB5C,RAC1,RILP,STX16,TAP1,TCIRG1,TUBB2A,TUBD1,VAMP2,VPS11,VPS16,VPS18,VPS33B,VPS37A,VPS37B,VPS39,VTI1A
Agranulocyte Adhesion and Diapedesis	2.85	Up	ACKR3,ACKR4,ACTB,ACTG1,AOC3,CCL20,CCL22,CCL28,CCL3,CCL4,CCL5,CCR1,CD34,CLDN1,CLDN12,CLDN14,CLDN23,CLDN4,CLDN7,CX3CL1,CXCL10,CXCL11,CXCL16,CXCL17,CXCL2,CXCL3,CXCL5,CXCL8,CXCL9,GNAI1,GNAI2,GNAI3,HRH1,ICAM1,ICAM2,IL1A,IL1RN,IL36A,IL36G,ITGA5,ITGB2,ITGB7,MMP1,MMP13,MMP14,MMP15,MMP17,MMP19,MMP25,MMP28,MMP9,MYH14,MYH3,MYH7,MYO10,MYO18A,PECAM1,PODXL,SDC4,SELL,TNF,TNFRSF1A,VCAM1
Semaphorin Signaling in Neurons	2.82	Up	ARHGAP1,CFL1,CFL2,FES,MET,NRP1,PAK4,PLXNA1,PLXNA2,PLXNA3,RAC1,RHOB,RHOC,RHOF,RHOG,RHOH,RHOT1,RHOV,RND1,RND3,ROCK1,SEMA3A,SEMA4D,SEMA7A
Bladder Cancer Signaling	2.82	Up	ABL1,CCND1,CDKN1A,CXCL8,E2F2,E2F3,E2F4,E2F5,E2F6,EGF,FGF11,FGF13,FGF2,FGF5,FGFR3,HDAC1,HDAC6,HDAC7,HDAC9,MMP1,MMP13,MMP14,MMP15,MMP17,MMP19,MMP25,MMP28,MMP9,MYC,RALA,RALB,RAP1B,RASD1,RRAS,RRAS2,SIN3A,THBS1,VEGFA,VEGFC
Renal Cell Carcinoma Signaling	2.8	Up	AKT1,AKT2,CREBBP,CRK,CUL2,EGLN3,EP300,FOS,GAB1,GRB2,JUN,MET,PAK4,PDGFB,PIK3C2B,PIK3R1,PIK3R3,RAC1,RALA,RALB,RAP1B,RASD1,RBX1,RRAS,RRAS2,SOS1,TGFA,UBC,VEGFA
Role of MAPK Signaling in Inhibiting the Pathogenesis of Influenza	2.8	Up	ABHD3,ARAF,CASP3,CCL5,CXCL10,CXCL8,EIF2AK2,IFNB1,IL6,JUN,MAP2K3,MAP2K4,MAP2K6,MAP2K7,MAP3K5,MAPK11,MYD88,NFKB1,NFKB2,NFKBIA,NFKBIE,PLA2G2F,PLA2G3,PLA2G4C,PLAAT2,PLAAT4,PNPLA2,PTGS2,TNF
Role of NFAT in Cardiac Hypertrophy	2.75	Up	ADCY2,ADCY4,ADCY6,ADCY7,AKAP5,AKT1,AKT2,CACNA1A,CACNA1I,CACNB1,CACNG8,CALM1 (includes others),CAMK2D,CSNK1A1,EP300,GATA4,GNAI1,GNAI2,GNAI3,GNAS,GNG5,GRB2,GUCY1A1,HDAC1,HDAC6,HDAC7,HDAC9,IL11,IL6,IL6ST,LIF,MAP2K3,MAP2K4,MAP2K6,MAP2K7,MAP3K1,MAPK11,MEF2A,MEF2C,MEF2D,PDIA3,PIK3C2B,PIK3R1,PIK3R3,PLCB3,PLCD3,PLCL1,PPP3CC,PPP3R1,PRKAG1,PRKAR2B,PRKCE,PRKCQ,RALA,RALB,RAP1B,RASD1,RCAN1,RRAS,RRAS2,SHC1,SLC…
RHOGDI Signaling	2.75	Up	ACTB,ACTG1,ACTR3,ARHGAP1,ARHGAP12,ARHGDIA,ARHGEF1,ARHGEF11,ARHGEF16,ARHGEF18,ARHGEF2,ARHGEF3,ARHGEF5,ARHGEF6,ARPC2,ARPC5,ARPC5L,CD44,CDH3,CDH4,CFL1,CFL2,CREBBP,EP300,GNA13,GNA14,GNAI1,GNAI2,GNAI3,GNAS,GNG5,ITGA10,ITGA3,ITGA5,ITGB2,ITGB4,ITGB7,MYH14,MYH3,MYH7,MYL12A,MYL12B,MYO10,MYO18A,PAK4,PIKFYVE,PIP4K2C,PIP5K1A,PIP5K1C,PPP1R12A,PPP1R12C,RAC1,RHOB,RHOC,RHOF,RHOG,RHOH,RHOT1,RHOV,RND1,RND3,ROCK1,S…
RAC Signaling	2.69	Up	ACTR3,ARPC2,ARPC5,ARPC5L,CD44,CFL1,CFL2,ELK1,ELK4,IQGAP3,ITGA10,ITGA3,ITGA5,ITGB2,ITGB4,ITGB7,JUN,MAP2K4,MAP2K7,MAP3K1,MAP3K11,NCF1,NFKB1,NFKB2,NOX1,PAK4,PIK3C2B,PIK3R1,PIK3R3,PIKFYVE,PIP4K2C,PIP5K1A,PIP5K1C,PTK2B,RAC1,RALA,RALB,RAP1B,RASD1,RELA,RELB,RRAS,RRAS2,SH3RF1
Spliceosomal Cycle	2.61	Up	CDC5L,CTNNBL1,CWC25,DDX23,DDX39B,DHX15,DHX38,DHX8,EIF4A3,GPKOW,ISY1,MAGOHB,PLRG1,SF3A2,SF3B4,SLU7,SNIP1,U2AF1L4,XAB2,YJU2
Semaphorin Neuronal Repulsive Signaling Pathway	2.61	Up	AKT1,AKT2,CD44,CFL1,CFL2,FARP2,FES,GUCY1A1,ITGA10,ITGA3,ITGA5,ITGB2,ITGB4,ITGB7,MAP2K3,MAP2K4,MAP2K6,MAP2K7,MICAL1,MYL12A,MYL12B,NRP1,NRP2,PAK4,PDE4A,PDE4B,PDE4C,PDE4D,PIK3C2B,PIK3R1,PIK3R3,PIP5K1C,PLXNA1,PLXNA2,PLXNA3,PPP1R12A,PRKAG1,PRKAR2B,RAC1,RND1,ROCK1,RRAS,SEMA3A,SEMA3F,SEMA4D,SEMA6A,SEMA6D
Endocannabinoid Developing Neuron Pathway	2.57	Up	ADCY2,ADCY4,ADCY6,ADCY7,AKT1,AKT2,ARAF,ATF4,CCND1,CNR1,CREB1,CREB3,CREB3L1,CREBBP,GNAI1,GNAI2,GNAI3,GNG5,GUCY1A1,MAP2K3,MAP2K4,MAP2K6,MAP2K7,MAPK11,MAPK6,MAPK7,PIK3C2B,PIK3R1,PIK3R3,PRKAG1,PRKAR2B,RAC1,RALA,RALB,RAP1B,RASD1,RPTOR,RRAS,RRAS2,SRC,STAT3
Adipogenesis pathway	2.55	Up	ACVR2A,ACVRL1,AKT1,BMP2,BMPR1A,BMPR2,CEBPB,CEBPD,DDIT3,EGR2,FBXW7,FGF2,FGFR3,FOXO1,FZD5,FZD8,HDAC1,HDAC6,HDAC7,HDAC9,KAT2B,KAT6A,KAT6B,KAT7,KLF3,KLF5,KMT2B,LPIN1,NOCT,NR1D1,NR2F2,PPARG,SAP130,SAP18,SETDB1,SIN3A,SMAD1,SMAD3,SOX9,SREBF1,TNF,TNFRSF1A,TXNIP,XBP1
IL-7 Signaling Pathway	2.55	Up	AKT1,AKT2,BAK1,CCND1,CCND3,FOXO1,FOXO3,GRB2,IL2RG,IL7,IL7R,JAK1,JAK3,JUN,LYN,MAPK11,MCL1,MET,MYC,PAX5,PIK3C2B,PIK3R1,PIK3R3,SHC1,SOCS1,SOS1,STAT1,STAT5A
Role of NANOG in Mammalian Embryonic Stem Cell Pluripotency	2.51	Up	ACVR2A,ACVRL1,AKT1,AKT2,AXIN1,BMP1,BMP2,BMP3,BMPR1A,BMPR2,FZD5,FZD8,GAB1,GATA4,GATA6,GRB2,IL6ST,JAK1,JAK2,JAK3,LIF,LIFR,PIK3C2B,PIK3R1,PIK3R3,RALA,RALB,RAP1B,RASD1,RIF1,RRAS,RRAS2,SALL4,SHC1,SMAD1,SMAD4,SOS1,STAT3,WNT10A,WNT4
IGF-1 Signaling	2.49	Up	AKT1,AKT2,CCN1,CCN3,ELK1,FOS,FOXO1,FOXO3,GRB10,GRB2,IGFBP3,IGFBP4,IGFBP6,IRS2,JAK1,JAK2,JUN,PIK3C2B,PIK3R1,PIK3R3,PRKAG1,PRKAR2B,RALA,RALB,RAP1B,RASD1,RRAS,RRAS2,SHC1,SOCS1,SOCS2,SOCS3,SOS1,STAT3,YWHAZ
CXCR4 Signaling	2.48	Up	ADCY2,ADCY4,ADCY6,ADCY7,AKT1,AKT2,ARHGEF11,BCAR1,CRK,EGR1,ELK1,ELMO2,FOS,GNA13,GNA14,GNAI1,GNAI2,GNAI3,GNAS,GNG5,GUCY1A1,JUN,LYN,MAP2K4,MYL12A,MYL12B,PAK4,PIK3C2B,PIK3R1,PIK3R3,PLCB3,PRKCE,PRKCQ,RAC1,RALA,RALB,RAP1B,RASD1,RHOB,RHOC,RHOF,RHOG,RHOH,RHOT1,RHOV,RND1,RND3,ROCK1,RRAS,RRAS2,SRC
Cell Cycle: G1/S Checkpoint Regulation	2.46	Up	ABL1,CCND1,CCND3,CCNE2,CDKN1A,CDKN2D,E2F2,E2F3,E2F4,E2F5,E2F6,E2F7,FBXL5,FOXO1,HDAC1,HDAC6,HDAC7,HDAC9,MAX,MYC,NRG1,SIN3A,SMAD3,SMAD4,TGFB3
Transcriptional Regulatory Network in Embryonic Stem Cells	2.44	Up	CDYL,FOXC1,GATA4,GATA6,H3-3A/H3-3B,H4C12,H4C14,H4C15,H4C8,HESX1,HOXB1,ISL1,KAT6A,L1CAM,LHX5,MEIS1,OTX1,RIF1,SET,SIX3,STAT3
GŒ±12/13 Signaling	2.43	Up	AKT1,AKT2,ARHGEF1,CDH3,CDH4,CHUK,ELK1,F2RL1,GNA13,IKBKB,IKBKE,JUN,LPAR1,LPAR6,MAP2K4,MAP2K7,MAP3K1,MAP3K5,MAPK7,MEF2A,MEF2C,MEF2D,MYL12A,MYL12B,NFKB1,NFKB2,NFKBIA,NFKBIE,PIK3C2B,PIK3R1,PIK3R3,PTK2B,RALA,RALB,RAP1B,RASD1,RELA,RELB,ROCK1,RRAS,RRAS2,SRC
Atherosclerosis Signaling	2.43	Up	ABHD3,ALOX12,ALOX15B,ALOX5,APOD,APOL1,CD40,CLU,COL18A1,COL1A1,COL5A3,CSF1,CXCL8,F3,ICAM1,IL1A,IL1RN,IL36A,IL36G,IL6,ITGB2,LYZ,MMP1,MMP13,MMP9,NFKB1,NFKB2,PDGFB,PLA2G2F,PLA2G3,PLA2G4C,PLAAT2,PLAAT4,PNPLA2,RELA,RELB,SAA4,TNF,TNFRSF12A,TNFRSF14,TNFSF14,VCAM1
CDX Gastrointestinal Cancer Signaling Pathway	2.41	Up	AKT1,AKT2,BMP1,BMP2,BMP3,CCND1,CHUK,CLCF1,CXCL8,FOS,FZD5,FZD8,GATA6,HBEGF,IKBKB,IKBKE,IL11,IL12A,IL15,IL17C,IL1A,IL36A,IL36G,IL6,JAK1,JAK2,JAK3,JUN,KLF5,LIF,MAPK11,NCF1,NFKB1,NFKB2,NOX1,PIK3C2B,PIK3R1,PIK3R3,PNN,PTEN,PTGS2,RAC1,RELA,RELB,SALL4,SMAD4,SNAI1,STAT3,TCF4,TCF7L2,TGFB3,TNF,TNFSF10,TNFSF11,TNFSF13,TNFSF13B,TNFSF14,WNT10A,WNT4
Inhibition of Angiogenesis by TSP1	2.39	Up	AKT1,AKT2,CASP3,CD47,GUCY1A1,HSPG2,JUN,KDR,MAP2K4,MAPK11,MMP9,NOS3,SDC1,THBS1,VEGFA
IL-2 Signaling	2.34	Up	AKT1,AKT2,ELK1,FOS,GRB2,IL2RG,JAK1,JAK3,JUN,PIK3C2B,PIK3R1,PIK3R3,PTK2B,RALA,RALB,RAP1B,RASD1,RRAS,RRAS2,SHC1,SOCS1,SOS1,STAT5A
Chondroitin Sulfate Degradation (Metazoa)	2.32	Up	ARSB,CEMIP,CEMIP2,GM2A,HEXA,HEXB,HEXD,HYAL1,OGA
Glioblastoma Multiforme Signaling	2.32	Up	AKT1,AKT2,AXIN1,CCND1,CCND3,CCNE2,CDKN1A,E2F2,E2F3,E2F4,E2F5,E2F6,E2F7,EGF,FOXO1,FZD5,FZD8,GRB2,IGF2,MYC,NF1,PDGFB,PDIA3,PIK3C2B,PIK3R1,PIK3R3,PLCB3,PLCD3,PLCL1,PTEN,RAC1,RALA,RALB,RAP1B,RASD1,RHOB,RHOC,RHOF,RHOG,RHOH,RHOT1,RHOV,RND1,RND3,RRAS,RRAS2,SHC1,SOS1,SRC,WNT10A,WNT4
NAD Signaling Pathway	2.31	Up	AKT1,AKT2,BST1,CD38,CEBPB,EGF,EIF2AK3,ERN1,FGF2,H1-0,H1-3,H2BC12,H2BC17,H2BC5,H2BU1,NADK,NAMPT,NFKB1,NFKB2,NT5E,PARP10,PARP11,PARP12,PARP14,PARP15,PARP3,PARP4,PARP6,PARP8,PARP9,PDGFB,PIK3C2B,PIK3R1,PIK3R3,POLR2A,PRKAB1,PRKAG1,SIRT6,SIRT7,SLC12A8,SLC7A5,SOD2,SREBF1,TGFA,TNKS2,VEGFA
Chondroitin and Dermatan Biosynthesis	2.3	Up	CHPF,CHPF2,CHSY1,CHSY3,CSGALNACT2
Cyclins and Cell Cycle Regulation	2.27	Up	ABL1,CCNA1,CCND1,CCND3,CCNE2,CDKN1A,CDKN2D,E2F2,E2F3,E2F4,E2F5,E2F6,E2F7,FBXL5,HDAC1,HDAC6,HDAC7,HDAC9,PPM1J,PPP2CA,PPP2CB,PPP2R1B,PPP2R2A,PPP2R2C,PPP2R5A,PPP2R5B,PTPA,SIN3A,TGFB3
Cardiac Œ≤-adrenergic Signaling	2.27	Up	ADCY2,ADCY4,ADCY6,ADCY7,AKAP10,AKAP12,AKAP13,AKAP17A,AKAP5,AKAP7,AKAP8,ATP2A3,CACNA1A,CACNB1,CACNG8,ENPP1,FICD,GDPD3,GNA13,GNA14,GNAI1,GNAI2,GNAI3,GNAS,GNG5,GRK2,GRK3,GUCY1A1,MPPE1,PDE4A,PDE4B,PDE4C,PDE4D,PDE6D,PDE8A,PDE9A,PPM1J,PPP1R10,PPP1R11,PPP1R12A,PPP1R3D,PPP2CA,PPP2CB,PPP2R1B,PPP2R2A,PPP2R2C,PPP2R5A,PPP2R5B,PRKAG1,PRKAR2B,PTPA,SLC8A1,SLC8A2
Insulin Secretion Signaling Pathway	2.26	Up	ADCY2,ADCY4,ADCY6,ADCY7,ATF4,BET1L,CACNA1A,CACNA1I,CACNB1,CACNG8,CAMK2D,CHRM3,CREB1,CREB3,CREB3L1,CREBBP,CRTC2,EIF2AK3,EIF2B1,EIF2S1,EIF2S2,EIF4A1,EIF4A3,EIF4E,EIF4G1,FGR,GCGR,GNA14,GNAS,GOSR1,GOSR2,GUCY1A1,JAK1,JAK2,JAK3,KLF11,LYN,MAPK11,NAPA,NAPG,NSF,PAIP1,PDHX,PDIA3,PIK3C2B,PIK3R1,PIK3R3,PLCB3,PLCD3,PLCL1,PRKAG1,PRKAR2B,PRKCE,PRKCQ,RAP1B,SCNN1A,SEC11C,SEC61A1,SPCS2,SRC,SRP54,SRP68,SRP72,SSR1,S…
RHOA Signaling	2.25	Up	ABL2,ACTB,ACTG1,ACTR3,ARHGAP1,ARHGAP12,ARHGEF1,ARHGEF11,ARPC2,ARPC5,ARPC5L,CDC42EP1,CDC42EP2,CDC42EP3,CDC42EP4,CDC42EP5,CFL1,CFL2,EPHA1,GNA13,LPAR1,LPAR6,MYL12A,MYL12B,NRP2,PIKFYVE,PIP4K2C,PIP5K1A,PIP5K1C,PLEKHG5,PLXNA1,PPP1R12A,PTK2B,RAPGEF2,RND3,ROCK1,SEMA3F,SEPTIN4,SEPTIN6
FLT3 Signaling in Hematopoietic Progenitor Cells	2.21	Up	AKT1,AKT2,ATF4,CREB1,CREB3,CREB3L1,CREBBP,EIF4E,ELK1,FLT3LG,GRB2,MAPK11,PIK3C2B,PIK3R1,PIK3R3,RALA,RALB,RAP1B,RASD1,RRAS,RRAS2,SHC1,SOS1,STAT1,STAT2,STAT3,STAT5A,STAT6
FGF Signaling	2.2	Up	AKT1,AKT2,ATF4,CREB1,CREB3,CREB3L1,CREBBP,CRK,FGF11,FGF13,FGF2,FGF5,FGFR3,FRS2,GAB1,GRB2,MAP2K3,MAP2K6,MAP3K1,MAP3K5,MAPK11,MAPKAPK2,MET,PIK3C2B,PIK3R1,PIK3R3,RAC1,SOS1,STAT3
Type II Diabetes Mellitus Signaling	2.19	Up	ACSL1,ACSL3,ACSL5,ADIPOR2,AKT1,AKT2,CACNA1A,CACNA1I,CACNB1,CACNG8,CEBPB,CHUK,IKBKB,IKBKE,IRS2,MAP2K4,MAP2K7,MAP3K1,MAP3K14,MAP3K5,NFKB1,NFKB2,NFKBIA,NFKBIE,PIK3C2B,PIK3R1,PIK3R3,PKM,PPARG,PRKAB1,PRKAG1,PRKCE,PRKCQ,RELA,RELB,SLC27A3,SMPD1,SMPD3,SOCS1,SOCS2,SOCS3,TNF,TNFRSF1A,TNFRSF1B,TRADD,TRAF2
Glioma Signaling	2.19	Up	ABL1,AKT1,AKT2,CALM1 (includes others),CAMK2D,CCND1,CCND3,CDKN1A,CDKN2D,E2F2,E2F3,E2F4,E2F5,E2F6,E2F7,EGF,GRB2,HDAC1,HDAC6,HDAC7,HDAC9,IGF2,PDGFB,PIK3C2B,PIK3R1,PIK3R3,PRKCE,PRKCQ,PTEN,RALA,RALB,RAP1B,RASD1,RRAS,RRAS2,SHC1,SIN3A,SOS1,TGFA
P2Y Purigenic Receptor Signaling Pathway	2.19	Up	ADCY2,ADCY4,ADCY6,ADCY7,AKT1,AKT2,ATF4,CREB1,CREB3,CREB3L1,CREBBP,FOS,GNAI1,GNAI2,GNAI3,GNG5,GUCY1A1,JUN,MYC,NFKB1,NFKB2,P2RY6,PDIA3,PIK3C2B,PIK3R1,PIK3R3,PLCB3,PLCD3,PLCL1,PRKAG1,PRKAR2B,PRKCE,PRKCQ,RALA,RALB,RAP1B,RASD1,RELA,RELB,RRAS,RRAS2
Sperm Motility	2.19	Up	ABHD3,ABL1,ABL2,AXL,CACNA1I,CALM1 (includes others),CLK1,CLK3,CSK,DDR2,DYRK1A,EPHA1,EPHA2,EPHB3,ERBB3,FES,FGFR3,FGR,FLT1,FLT3LG,FLT4,FRK,GNA13,GNA14,GNAI1,GNAI2,GNAI3,GNAS,GNG5,GUCY1A1,JAK1,JAK2,JAK3,KDR,LMTK3,LYN,MAP2K3,MAP2K4,MAP2K6,MAP2K7,MAP3K11,MET,MST1R,NPR1,PDE4A,PDE4B,PDE4C,PDE4D,PDIA3,PLA2G2F,PLA2G3,PLA2G4C,PLAAT2,PLAAT4,PLCB3,PLCD3,PLCL1,PNPLA2,PRKAG1,PRKAR2B,PRKCE,PRKCQ,PTK2B,PTK6,RET,…
Inhibition of Matrix Metalloproteases	2.18	Up	ADAM10,ADAM17,HSPG2,MMP1,MMP13,MMP14,MMP15,MMP17,MMP19,MMP25,MMP28,MMP9,SDC1,TFPI2,TIMP1,TIMP2
FcŒ≥ Receptor-mediated Phagocytosis in Macrophages and Monocytes	2.18	Up	ACTB,ACTG1,ACTR3,AKT1,AKT2,ARF6,ARPC2,ARPC5,ARPC5L,CRK,FCGR2A,FGR,FYB1,HMOX1,LYN,NCF1,NCK1,PIK3R1,PIK3R3,PIP5K1A,PLD3,PRKCE,PRKCQ,PTEN,PTK2B,RAB11A,RAC1,SRC,TLN2,VASP,YES1
Non-Small Cell Lung Cancer Signaling	2.18	Up	ABL1,AKT1,AKT2,CCND1,CCND3,E2F2,E2F3,E2F4,E2F5,E2F6,EGF,FOXO3,GRB2,HDAC1,HDAC6,HDAC7,HDAC9,PIK3C2B,PIK3R1,PIK3R3,RALA,RALB,RAP1B,RASD1,RASSF5,RRAS,RRAS2,SIN3A,SOS1,STK4,TGFA
UVA-Induced MAPK Signaling	2.17	Up	CASP3,FOS,JUN,MAP2K4,MAPK11,PARP10,PARP11,PARP12,PARP14,PARP15,PARP3,PARP4,PARP6,PARP8,PARP9,PDIA3,PIK3C2B,PIK3R1,PIK3R3,PLCB3,PLCD3,PLCL1,RALA,RALB,RAP1B,RASD1,RRAS,RRAS2,SMPD1,SMPD3,STAT1,TNKS2
Remodeling of Epithelial Adherens Junctions	2.14	Up	ACTB,ACTG1,ACTN4,ACTR3,ARF6,ARPC2,ARPC5,ARPC5L,CBLL1,CTNNA1,CTNND1,DNM1L,DNM2,EXOC2,HGS,MAPRE1,MET,RAB5A,RAB5C,RALA,SRC,TUBB2A,VCL,ZYX
Differential Regulation of Cytokine Production in Intestinal Epithelial Cells by IL-17A and IL-17F	2.13	Up	CCL3,CCL4,CCL5,CSF3,DEFB1,DEFB4A/DEFB4B,IL10,IL12A,IL1A,LCN2,TNF
Dermatan Sulfate Degradation (Metazoa)	2.12	Up	CEMIP,CEMIP2,GM2A,HEXA,HEXB,HEXD,HYAL1,IDUA,OGA
VEGF Signaling	2.1	Up	ACTB,ACTG1,ACTN4,AKT1,AKT2,EIF2B1,EIF2S1,EIF2S2,FLT1,FLT4,FOXO1,FOXO3,GRB2,KDR,NOS3,PIK3C2B,PIK3R1,PIK3R3,PTK2B,RALA,RALB,RAP1B,RASD1,ROCK1,RRAS,RRAS2,SHC1,SOS1,SRC,VCL,VEGFA,VEGFC
Macropinocytosis Signaling	2.1	Up	ACTN4,ANKFY1,ARF6,CSF1,EGF,ITGA5,ITGB2,ITGB4,ITGB7,MET,PDGFB,PIK3C2B,PIK3R1,PIK3R3,PRKCE,PRKCQ,RAB5A,RAC1,RALA,RALB,RAP1B,RASD1,RRAS,RRAS2,SRC,USP6NL
Pyridoxal 5'-phosphate Salvage Pathway	2.08	Up	ACVR2A,ADPGK,AKT2,ARAF,CDK18,CSNK1A1,DYRK1A,EIF2AK2,GRK5,GRK6,IRAK1,MAP2K3,MAP2K4,MAP2K6,MAP3K6,MAP3K8,MAPK6,MAPK7,PDXK,PRKCE,PRKCQ,PRPF4B,SGK1
LXR/RXR Activation	2.08	Up	ABCA1,APOD,APOL1,C3,C4A/C4B,CLU,ECHS1,IL18RAP,IL1A,IL1RAP,IL1RL1,IL1RN,IL36A,IL36G,IL6,IRF3,LDLR,LYZ,MMP9,MYLIP,NCOR1,NFKB1,NFKB2,NOS2,NR1H2,PON3,PTGS2,RELA,RELB,SAA4,SCD,SERPINF1,SREBF1,TF,TLR3,TNF,TNFRSF1A,TNFRSF1B
VEGF Family Ligand-Receptor Interactions	2.07	Up	AKT1,AKT2,FLT1,FLT4,FOS,GRB2,KDR,NOS3,NRP1,NRP2,PIK3C2B,PIK3R1,PIK3R3,PLA2G2F,PLA2G3,PLA2G4C,PRKCE,PRKCQ,RALA,RALB,RAP1B,RASD1,RRAS,RRAS2,SHC1,SOS1,VEGFA,VEGFC
Insulin Receptor Signaling	2.03	Up	AKT1,AKT2,CRK,EIF2B1,EIF4E,FOXO1,FOXO3,GAB1,GRB10,GRB2,INPPL1,IRS2,JAK1,JAK2,NCK1,PIK3C2B,PIK3R1,PIK3R3,PPP1R10,PPP1R11,PPP1R12A,PPP1R3D,PRKAG1,PRKAR2B,PTEN,PTPN1,RALA,RALB,RAP1B,RASD1,RPTOR,RRAS,RRAS2,SCNN1A,SGK1,SHC1,SOCS3,SOS1,STX4,SYNJ1,TRIP10,VAMP2
Estrogen-Dependent Breast Cancer Signaling	2.01	Up	AKT1,AKT2,ATF4,CCND1,CREB1,CREB3,CREB3L1,CREBBP,ELK1,FOS,JUN,NFKB1,NFKB2,PIK3C2B,PIK3R1,PIK3R3,RALA,RALB,RAP1B,RASD1,RELA,RELB,RRAS,RRAS2,SP1,SRC,STAT5A
GM-CSF Signaling	1.97	Up	AKT1,AKT2,BCL2A1,CAMK2D,CCND1,ELK1,GRB2,JAK2,LYN,PIK3C2B,PIK3R1,PIK3R3,PPP3CC,PPP3R1,RALA,RALB,RAP1B,RASD1,RRAS,RRAS2,SHC1,SOS1,STAT1,STAT3
IL-22 Signaling	1.97	Up	AKT1,AKT2,IL10RB,IL22RA1,JAK1,MAP2K4,MAPK11,SOCS3,STAT1,STAT3,STAT5A
Th2 Pathway	1.97	Up	ACVR1B,ACVR2A,APH1A,BMPR2,CCR1,CD3E,CD40,CRLF2,GATA3,GRB2,HLA-A,HLA-B,HLA-DMA,HLA-DOB,HLA-DRA,ICAM1,ICOSLG/LOC102723996,IL10,IL12A,IL1RL1,IL2RG,IL4R,ITGB2,JAG1,JAK1,JAK2,JAK3,JUN,NCSTN,NFKB1,NOTCH2,PIK3C2B,PIK3R1,PIK3R3,PRKCQ,PSEN1,PSEN2,RUNX3,SOCS3,STAT5A,STAT6
PFKFB4 Signaling Pathway	1.97	Up	ATF4,CREB1,CREB3,CREB3L1,CREBBP,FGF2,GNAS,HK2,MAP2K3,MAP2K4,MAP2K6,MAP2K7,NCOA3,PFKFB4,PRKAG1,PRKAR2B,TGFB3,XDH
Thrombopoietin Signaling	1.93	Up	FOS,GRB2,IRS2,JAK2,JUN,MYC,PIK3C2B,PIK3R1,PIK3R3,PRKCE,PRKCQ,RALA,RALB,RAP1B,RASD1,RRAS,RRAS2,SHC1,SOS1,STAT1,STAT3,STAT5A
Notch Signaling	1.9	Up	ADAM17,APH1A,DLL4,DTX2,DTX4,HES1,HES5,JAG1,MAML1,MAML2,NCSTN,NOTCH2,NUMB,PSEN1,PSEN2
EGF Signaling	1.9	Up	AKT1,AKT2,EGF,ELK1,FOS,GRB2,JAK1,JUN,MAP2K4,MAP2K7,MAP3K1,MAPK11,PIK3C2B,PIK3R1,PIK3R3,SHC1,SOS1,SRC,STAT1,STAT3
ERBB4 Signaling	1.83	Up	ADAM17,AKT1,APH1A,GRB2,NCSTN,NRG1,NRG2,PIK3C2B,PIK3R1,PIK3R3,PRKCE,PRKCQ,PSEN1,PSEN2,RALA,RALB,RAP1B,RASD1,RRAS,RRAS2,SHC1,SOS1,YAP1
GDNF Family Ligand-Receptor Interactions	1.8	Up	CREB1,DOK1,DOK7,FOS,FRS2,GAB1,GRB2,IRS2,JUN,MAP2K4,NCK1,PDLIM7,PIK3C2B,PIK3R1,PIK3R3,RAC1,RALA,RALB,RAP1B,RASD1,RET,RRAS,RRAS2,SHC1,SOS1
Role of BRCA1 in DNA Damage Response	1.79	Up	ACTB,ARID1A,BARD1,BRCA2,BRD7,BRIP1,CDKN1A,CHEK2,E2F2,E2F3,E2F4,E2F5,E2F6,E2F7,FAAP24,FANCA,FANCL,GADD45A,NBN,POU2F1,RBBP8,RFC1,RFC2,SMARCD1,SMARCE1,STAT1
Role of MAPK Signaling in the Pathogenesis of Influenza	1.79	Up	ABHD3,AKT1,AKT2,CASP3,CCL5,CXCL10,IFNB1,MAP2K3,MAP2K4,MAP2K6,MAP2K7,MAP3K5,MAPK11,PLA2G2F,PLA2G3,PLA2G4C,PLAAT2,PLAAT4,PNPLA2,PTGS2,RALA,RALB,RAP1B,RASD1,RRAS,RRAS2,TNF
IL-13 Signaling Pathway	1.78	Up	AGR2,AKT1,AKT2,ALOX15B,ANO1,DEFB1,DEFB4A/DEFB4B,FGR,FOSL2,FRK,HBEGF,IL10,IL17RA,IL17RC,IL4R,JAK1,JAK2,JUN,LYN,MAPK11,MUC5AC,PIK3C2B,PIK3R1,PIK3R3,ROCK1,SOCS1,SOCS3,SPDEF,SRC,STAT1,STAT3,STAT6,TGFB3,TRAF6,YES1
ATM Signaling	1.77	Up	ABL1,ATF4,CDKN1A,CHEK2,CREB1,CREB3,CREB3L1,CREBBP,GADD45A,GADD45B,JUN,KAT5,MAP2K4,MAPK11,MDM4,NBN,NFKBIA,PPM1J,PPP2CA,PPP2CB,PPP2R1B,PPP2R2A,PPP2R2C,PPP2R5A,PPP2R5B,PTPA,RBBP8,RNF8,TLK1,TLK2,ZEB1
AMPK Signaling	1.77	Up	ACTB,ADRB2,AK2,AKT1,AKT2,ARID1A,ATF4,BRD7,CAB39,CAMKK2,CCND1,CDKN1A,CHRNA1,CPT1B,CREB1,CREB3,CREB3L1,CREBBP,CRTC2,EP300,FOXO1,FOXO3,GNA13,GNA14,GNAI1,GNAI2,GNAI3,GNAS,GNG5,IRS2,KAT2B,MAP2K3,MAPK11,NOS3,PCK2,PFKFB4,PFKL,PFKP,PHLPP2,PIK3C2B,PIK3R1,PIK3R3,PPM1B,PPM1J,PPM1K,PPP2CA,PPP2CB,PPP2R1B,PPP2R2A,PPP2R2C,PPP2R5A,PPP2R5B,PRKAB1,PRKAG1,PRKAR2B,PTPA,RAB11A,RAB27A,RAB39A,RAB8A,RPTOR,SMARCD1,SMARCE…
GŒ±q Signaling	1.76	Up	AKT1,AKT2,CALM1 (includes others),CHRM3,CHUK,CSK,ELK1,GNA13,GNA14,GNAI1,GNAI2,GNAI3,GNAS,GNG5,GRK2,HMOX1,HRH1,HTR2B,IKBKB,IKBKE,NFKB1,NFKB2,NFKBIA,NFKBIE,PIK3C2B,PIK3R1,PIK3R3,PLCB3,PLD3,PPP3CC,PPP3R1,PRKCE,PRKCQ,PTK2B,RAC1,RELA,RELB,RGS2,RHOB,RHOC,RHOF,RHOG,RHOH,RHOT1,RHOV,RND1,RND3,ROCK1
Glioma Invasiveness Signaling	1.74	Up	CD44,MMP9,PIK3C2B,PIK3R1,PIK3R3,PLAUR,RAC1,RALA,RALB,RAP1B,RASD1,RHOB,RHOC,RHOF,RHOG,RHOH,RHOT1,RHOV,RND1,RND3,RRAS,RRAS2,TIMP1,TIMP2
Oxytocin Signaling Pathway	1.73	Up	AKT1,AKT2,ATF4,CACNA1A,CACNB1,CACNG8,CALM1 (includes others),CAMKK2,CCDC51,CCL5,CREB1,CREB3,CREB3L1,CREBBP,CXCL8,FOS,GNA13,GNAI1,GNAI2,GNAI3,GNG5,GRB2,GUCY1A1,IL6,KCNT2,MAP2K4,MAPK11,MAPK6,MAPK7,MEF2C,MFN2,MYH14,MYH3,MYH7,MYO10,MYO18A,NFKB1,NFKB2,NOS3,NPR1,NPR3,PIK3C2B,PIK3R1,PIK3R3,PLA2G2F,PLA2G3,PLA2G4C,PLCB3,PNPLA2,PPARD,PPARG,PPP1R12A,PPP3CC,PPP3R1,PRKAB1,PRKAG1,PRKAR2B,PRKCE,PRKCQ,PTGS2,RALA…
Coenzyme A Biosynthesis	1.69	Up	COASY,PPCDC,PPCS
L-serine Degradation	1.69	Up	SDS,SDSL,SRR
Estrogen-mediated S-phase Entry	1.68	Up	CCNA1,CCND1,CCNE2,CDKN1A,E2F2,E2F3,E2F4,E2F5,E2F6,E2F7,MYC
PTEN Signaling	1.67	Up	AKT1,AKT2,BCAR1,BMPR1A,BMPR2,CASP3,CCND1,CDKN1A,CHUK,FGFR3,FLT1,FLT4,FOXO1,FOXO3,GRB2,IKBKB,IKBKE,INPPL1,ITGA10,ITGA3,ITGA5,ITGB2,ITGB4,ITGB7,KDR,NFKB1,NFKB2,PIK3R1,PIK3R3,PTEN,RAC1,RALA,RALB,RAP1B,RASD1,RELA,RELB,RRAS,RRAS2,SHC1,SIRT6,SOS1,SYNJ1
p53 Signaling	1.66	Up	AKT1,AKT2,APAF1,BBC3,CCND1,CDKN1A,CHEK2,EP300,FAS,GADD45A,GADD45B,HDAC1,HDAC9,JUN,KAT2B,MDM4,MED1,PIAS1,PIK3C2B,PIK3R1,PIK3R3,PLAGL1,PMAIP1,PML,PPP1R13B,PTEN,SCO2,THBS1,TNFRSF10A,TP53BP2
Melanocyte Development and Pigmentation Signaling	1.66	Up	ADCY2,ADCY4,ADCY6,ADCY7,ATF4,CREB1,CREB3,CREB3L1,CREBBP,CRK,EP300,GNAS,GRB2,GUCY1A1,MC1R,MITF,PIK3C2B,PIK3R1,PIK3R3,PRKAG1,PRKAR2B,RALA,RALB,RAP1B,RASD1,RRAS,RRAS2,SHC1,SOS1,SRC
Apelin Cardiac Fibroblast Signaling Pathway	1.64	Up	ACE2,AKT1,AKT2,IL6,NOS3,PRKAB1,PRKAG1,SERPINE1,SPHK1,TGFB3
NRF2-mediated Oxidative Stress Response	1.63	Up	ACTB,ACTG1,AKT1,ATF4,BACH1,CREBBP,CYP2C18,CYP2C9,CYP2D6,CYP2J2,CYP2S1,CYP3A5,DNAJA1,DNAJA2,DNAJB11,DNAJB12,DNAJB14,DNAJB9,DNAJC1,DNAJC13,DNAJC15,DNAJC5,DNAJC7,DNAJC9,EIF2AK3,EP300,ERP29,FKBP5,FOS,FOSL1,GSTK1,GSTO1,HERPUD1,HMOX1,HSP90B1,JUN,JUNB,KEAP1,MAFF,MAFK,MAP2K3,MAP2K4,MAP2K6,MAP2K7,MAP3K1,MAP3K5,MAPK7,PIK3C2B,PIK3R1,PIK3R3,PPIB,PRKCE,PRKCQ,RALA,RALB,RAP1B,RASD1,RBX1,RRAS,RRAS2,SOD2,SOD3,VCP
Corticotropin Releasing Hormone Signaling	1.63	Up	ADCY2,ADCY4,ADCY6,ADCY7,ARPC5,ATF4,CACNA1A,CACNA1I,CACNB1,CACNG8,CALM1 (includes others),CNR1,CREB1,CREB3,CREB3L1,CREBBP,ELK1,FOS,GLI2,GNAI1,GNAI2,GNAI3,GNAS,GUCY1A1,JUN,MAPK11,MEF2A,MEF2C,MEF2D,NOS2,NOS3,NPR1,NPR3,NR4A1,PRKAG1,PRKAR2B,PRKCE,PRKCQ,PTGS2,RAP1B,SLC39A7,SOX15,VEGFA
Mitotic Roles of Polo-Like Kinase	1.62	Up	ANAPC10,CAPN1,CDC25B,CDC27,CHEK2,ESPL1,FBXO5,FZR1,HSP90B1,PLK2,PLK3,PLK4,PPM1J,PPP2CA,PPP2CB,PPP2R1B,PPP2R2A,PPP2R2C,PPP2R5A,PPP2R5B,PTPA,SLK
Regulation of Actin-based Motility by Rho	1.61	Up	ACTB,ACTR3,ARHGDIA,ARPC2,ARPC5,ARPC5L,CFL1,ITGA10,ITGA3,ITGA5,ITGB2,ITGB4,ITGB7,MYL12A,MYL12B,PAK4,PIKFYVE,PIP4K2C,PIP5K1A,PIP5K1C,PPP1R12A,RAC1,RHOB,RHOC,RHOF,RHOG,RHOH,RHOT1,RHOV,RND1,RND3,ROCK1,WASL,WIPF1
Mechanisms of Viral Exit from Host Cells	1.59	Up	ACTB,ACTG1,CHMP2B,CHMP4A,CHMP4B,CHMP4C,LMNB1,PRKCE,PRKCQ,SH3GL1,SH3GLB1,SH3GLB2,VPS36,VPS4A,XPO1
WNT/Œ≤-catenin Signaling	1.59	Up	ACVR1B,ACVR2A,AKT1,AKT2,AXIN1,BMPR2,CCND1,CD44,CDH3,CREBBP,CSNK1A1,CSNK1G1,DKK1,DKK3,EP300,FZD5,FZD8,HDAC1,JUN,MARK2,MYC,PPARD,PPM1J,PPP2CA,PPP2CB,PPP2R1B,PPP2R2A,PPP2R2C,PPP2R5A,PPP2R5B,PTPA,RARA,RARG,SFRP1,SOX13,SOX15,SOX4,SOX9,SRC,TAB1,TCF4,TCF7L2,TGFB3,TLE1,TLE4,UBC,WNT10A,WNT4
Endometrial Cancer Signaling	1.57	Up	AKT1,AKT2,AXIN1,CCND1,CTNNA1,ELK1,FOXO3,GRB2,MYC,PIK3C2B,PIK3R1,PIK3R3,PTEN,RALA,RALB,RAP1B,RASD1,RRAS,RRAS2,SOS1
Ovarian Cancer Signaling	1.54	Up	ABL1,AKT1,AKT2,AXIN1,BRCA2,CCND1,CD44,E2F2,E2F3,E2F4,E2F5,E2F6,EDN1,EDNRA,EGF,FZD5,FZD8,HDAC1,HDAC6,HDAC7,HDAC9,MMP9,PIK3C2B,PIK3R1,PIK3R3,PRKAG1,PRKAR2B,PTEN,PTGS1,PTGS2,RALA,RALB,RAP1B,RASD1,RRAS,RRAS2,SIN3A,SRC,TCF4,TCF7L2,VEGFA,VEGFC,WNT10A,WNT4
Role of IL-17A in Psoriasis	1.54	Up	CCL20,CXCL3,CXCL5,CXCL8,DEFB4A/DEFB4B,IL17RA,IL17RC
PAK Signaling	1.51	Up	ARHGEF6,CASP3,CFL1,CFL2,DSCAM,EPHB3,GRB2,ITGA10,ITGA3,ITGA5,ITGB2,ITGB4,ITGB7,MAP2K4,MYL12A,MYL12B,NCK1,PAK4,PDGFB,PIK3C2B,PIK3R1,PIK3R3,PTK2B,RAC1,RALA,RALB,RAP1B,RASD1,RRAS,RRAS2,SHC1,SOS1,TNF,WASL
Hereditary Breast Cancer Signaling	1.51	Up	ACTB,AKT1,AKT2,ARID1A,BARD1,BRCA2,BRD7,CCND1,CCND3,CDKN1A,CHEK2,CREBBP,EP300,FAAP24,FANCA,FANCL,GADD45A,GADD45B,HDAC1,HDAC6,HDAC7,HDAC9,NBN,PALB2,PIK3C2B,PIK3R1,PIK3R3,POLR2A,PTEN,RALA,RALB,RAP1B,RASD1,RFC1,RFC2,RRAS,RRAS2,SMARCD1,SMARCE1,UBC
Agrin Interactions at Neuromuscular Junction	1.48	Up	ACTB,ACTG1,AGRN,ARHGEF6,CHRNA1,CTTN,ERBB3,JUN,LAMB1,LAMC1,MAP2K4,NRG1,NRG2,PAK4,RAC1,RALA,RALB,RAP1B,RASD1,RRAS,RRAS2,SRC
Gap Junction Signaling	1.48	Up	ACTB,ACTG1,ADCY2,ADCY4,ADCY6,ADCY7,AKT1,AKT2,CCN3,CSNK1A1,CSNK1G1,EGF,GJA4,GJB2,GJB3,GNAI1,GNAI2,GNAI3,GNAS,GRB2,GUCY1A1,HTR2B,LPAR1,MAPK7,NPR1,NPR3,PDIA3,PIK3C2B,PIK3R1,PIK3R3,PLCB3,PLCD3,PLCL1,PPP3CC,PPP3R1,PRKAG1,PRKAR2B,PRKCE,PRKCQ,RALA,RALB,RAP1B,RASD1,RRAS,RRAS2,SLC39A7,SOS1,SOX15,SP1,SRC,TJP1,TJP2,TUBB2A
Role of OCT4 in Mammalian Embryonic Stem Cell Pluripotency	1.47	Up	ASH2L,ETS2,FOXA1,HOXB1,JARID2,KDM5B,MEF2A,NR2F2,NR2F6,PPP1R8,RARA,SALL4,SH3GLB1,SPP1,TDRD7,WWP2
Dopamine-DARPP32 Feedback in cAMP Signaling	1.44	Up	ADCY2,ADCY4,ADCY6,ADCY7,ATF4,ATP2A3,CACNA1A,CACNB1,CACNG8,CALM1 (includes others),CAMKK2,CREB1,CREB3,CREB3L1,CREBBP,CREM,CSNK1A1,CSNK1G1,GNAI1,GNAI2,GNAI3,GNAS,GRIN3A,GRINA,GUCY1A1,KCNJ12,KCNJ2,PDIA3,PLCB3,PLCD3,PLCL1,PPM1J,PPP1R10,PPP1R11,PPP1R12A,PPP1R3D,PPP2CA,PPP2CB,PPP2R1B,PPP2R2A,PPP2R2C,PPP2R5A,PPP2R5B,PPP3CC,PPP3R1,PRKAG1,PRKAR2B,PRKCE,PRKCQ,PTPA
fMLP Signaling in Neutrophils	1.43	Up	ACTR3,ARPC2,ARPC5,ARPC5L,CALM1 (includes others),ELK1,GNA13,GNA14,GNAI1,GNAI2,GNAI3,GNAS,GNG5,NCF1,NFAT5,NFKB1,NFKB2,NFKBIA,NFKBIE,NOX1,PIK3C2B,PIK3R1,PIK3R3,PLCB3,PPP3CC,PPP3R1,PRKCE,PRKCQ,RAC1,RALA,RALB,RAP1B,RASD1,RELA,RELB,RRAS,RRAS2
GP6 Signaling Pathway	1.42	Up	ADAM10,AKT1,AKT2,CALM1 (includes others),COL16A1,COL17A1,COL18A1,COL1A1,COL22A1,COL24A1,COL25A1,COL4A6,COL5A3,COL7A1,COL8A1,COL9A2,FYB1,GRB2,LAMA1,LAMA3,LAMA5,LAMB1,LAMB3,LAMC1,LAMC2,LYN,NCK1,NOX1,PIK3C2B,PIK3R1,PIK3R3,PRKCE,PRKCQ,RAC1,RAP1B,RHOG
Role of JAK2 in Hormone-like Cytokine Signaling	1.42	Up	BIRC3,CCND1,CCND3,CYP3A5,FOS,IRS2,JAK1,JAK2,PTPN1,SCGB1A1,SH2B3,SHC1,SOCS1,SOCS2,SOCS3,STAT1,STAT3,STAT5A,VEGFA,VEGFC
Differential Regulation of Cytokine Production in Macrophages and T Helper Cells by IL-17A and IL-17F	1.41	Up	CCL3,CCL4,CCL5,CSF3,IL10,IL12A,IL6,TNF
Telomere Extension by Telomerase	1.37	Up	NBN,POT1,TERF1,TERF2,TERF2IP,TINF2,TNKS2
Opioid Signaling Pathway	1.37	Up	ADCY2,ADCY4,ADCY6,ADCY7,AKT1,AKT2,ATF4,CACNA1A,CACNA1I,CACNB1,CACNG8,CALM1 (includes others),CAMK2D,CREB1,CREB3,CREB3L1,CREBBP,ELK1,EP300,FGR,FOS,FRK,GNA13,GNA14,GNAI1,GNAI2,GNAI3,GNAS,GNG5,GRIN3A,GRINA,GRK2,GRK3,GRK5,GRK6,GUCY1A1,LYN,MAP2K3,MAP2K4,MAP2K6,MAP2K7,MAPK6,MAPK7,MYC,NFKB1,NFKB2,NFKBIA,NOS3,OGFR,PPP3CC,PPP3R1,PRKAG1,PRKAR2B,PRKCE,PRKCQ,RAC1,RALA,RALB,RAP1B,RASD1,RGS12,RGS19,RGS20,RGS3,…
Polyamine Regulation in Colon Cancer	1.35	Up	AKT1,AKT2,ARAF,FOS,JUN,MAP2K3,MAP2K4,MAP2K6,MAP2K7,MXD1,MYC,PPARG,RPTOR,SAT1,SLC3A2,SMOX,SMS,TCF4,TCF7L2
Thyroid Cancer Signaling	1.35	Up	AKT1,AKT2,CCND1,CXCL8,ELK1,FOS,FOXO1,IRS2,JUN,MYC,PIK3C2B,PIK3R1,PIK3R3,PTEN,RALA,RALB,RAP1B,RASD1,RET,RRAS,RRAS2,SHC1,TCF4,TCF7L2
Salvage Pathways of Pyrimidine Deoxyribonucleotides	1.34	Up	APOBEC3A,APOBEC3B,APOBEC3G,TK2,UPP1
Circadian Rhythm Signaling	1.33	Up	ADCY2,ADCY4,ADCY6,ADCY7,ARAF,ATF4,BHLHE40,CACNA1A,CACNA1I,CACNB1,CACNG8,CAMK2D,CIART,CREB1,CREB3,CREB3L1,CREBBP,DBP,EIF4E,FGR,FRK,GNA14,GNAI1,GNAI2,GNAI3,GNAS,GNG5,GRIN3A,GRINA,GUCY1A1,H3-3A/H3-3B,LYN,MAP2K3,MAP2K4,MAP2K6,MAP2K7,MKNK1,MKNK2,MTNR1A,MYC,NFIL3,NPR1,NPR3,NR1D1,NR1D2,NR3C1,PDIA3,PER3,PLCB3,PLCD3,PLCL1,PRKAB1,PRKAG1,PRKAR2B,PRKCE,PRKCQ,RALA,RALB,RAP1B,RASD1,RORB,RPTOR,RRAS,RRAS2,SLC39A…
MIF Regulation of Innate Immunity	1.32	Up	CD74,FOS,JUN,MAP2K4,NFKB1,NFKB2,NFKBIA,NFKBIE,NOS2,PLA2G2F,PLA2G3,PLA2G4C,PTGS2,RELA,RELB
Xenobiotic Metabolism Signaling	1.31	Up	ABCC3,ALDH1L2,ALDH3B2,ANKRA2,CAMK2D,CHST15,CHST4,CITED2,CREBBP,CYP2C9,CYP3A5,DNAJC7,EIF2AK3,EP300,GSTK1,GSTO1,HMOX1,HS3ST1,HSP90B1,IL1A,IL4I1,IL6,KEAP1,MAP2K3,MAP2K4,MAP2K6,MAP2K7,MAP3K1,MAP3K10,MAP3K11,MAP3K13,MAP3K14,MAP3K5,MAP3K6,MAP3K8,MAPK11,MAPK7,MED1,NCOA1,NFKB1,NFKB2,NOS2,NRIP1,PIK3C2B,PIK3R1,PIK3R3,PPM1J,PPP2CA,PPP2CB,PPP2R1B,PPP2R2A,PPP2R2C,PPP2R5A,PPP2R5B,PRKCE,PRKCQ,PTPA,RALA,RALB,RAP…
Mitochondrial Dysfunction	8.95	Down	ACO1,ACO2,AIFM1,APH1B,ATP5F1A,ATP5F1B,ATP5MC1,ATP5MC2,ATP5ME,ATP5MG,ATP5PB,ATP5PF,BACE1,CASP9,CAT,COX11,COX4I1,COX6A1,COX6C,COX7A1,COX7A2L,COX7C,CPT1A,CPT1C,CYB5A,CYB5R3,DHODH,DMAC2L,FIS1,GPX4,GPX7,GSR,HTRA2,MAPK10,MAPK9,NDUFA1,NDUFA10,NDUFA11,NDUFA2,NDUFA3,NDUFA8,NDUFAB1,NDUFAF1,NDUFB1,NDUFB10,NDUFB5,NDUFB6,NDUFB8,NDUFS1,NDUFS5,NDUFS6,NDUFS8,NDUFV1,NDUFV3,PARK7,PINK1,PRDX3,PRDX5,PRKN,PSENEN,SDHC…
Sirtuin Signaling Pathway	6.77	Down	ACADL,APEX1,ARG2,ATG10,ATG16L2,ATG2B,ATG4A,ATG9B,ATP5F1A,ATP5F1B,ATP5MC1,ATP5PB,ATP5PF,BAX,BECN1,CLOCK,CPT1A,CPT1C,E2F1,FOXO4,GABARAP,GABARAPL2,GABPB2,GLS,GOT2,GTF3C2,H1-5,H3-3A/H3-3B,KAT2A,LDHB,MAP1LC3A,MAPK1,MAPK15,MAPK3,MLYCD,MTOR,NDUFA1,NDUFA10,NDUFA11,NDUFA2,NDUFA3,NDUFA8,NDUFAB1,NDUFAF1,NDUFB1,NDUFB10,NDUFB5,NDUFB6,NDUFB8,NDUFS1,NDUFS5,NDUFS6,NDUFS8,NDUFV1,NDUFV3,NQO1,NR1H3,PARP1,PDK1,PFKFB…
Ethanol Degradation IV	4.47	Down	ACSS1,ACSS3,ALDH1A1,ALDH1A2,ALDH1A3,ALDH1B1,ALDH2,ALDH3A1,ALDH3A2,ALDH3B1,ALDH4A1,ALDH7A1,ALDH9A1,CAT,CYGB,DIP2A,GPX7
Pyrimidine Deoxyribonucleotides De Novo Biosynthesis I	4.44	Down	AK1,AK4,AK7,AK8,AK9,DTYMK,DUT,NME1,NME2,NME3,NME4,NME5,NME7,RRM1,RRM2B,TYMS
Ethanol Degradation II	3.99	Down	ACSS1,ACSS3,ADH1C,ADH6,ADH7,ADHFE1,AKR1A1,ALDH1A1,ALDH1A2,ALDH1A3,ALDH1B1,ALDH2,ALDH3A1,ALDH3A2,ALDH3B1,ALDH4A1,ALDH7A1,ALDH9A1,DHRS4,DIP2A
Xenobiotic Metabolism CAR Signaling Pathway	3.62	Down	ABCC1,ABCC2,ALDH16A1,ALDH18A1,ALDH1A1,ALDH1A2,ALDH1A3,ALDH1B1,ALDH1L1,ALDH2,ALDH3A1,ALDH3A2,ALDH3B1,ALDH4A1,ALDH5A1,ALDH7A1,ALDH9A1,CHST1,CHST10,CHST12,CHST13,CHST7,CYP1A1,CYP2C8,FMO3,FMO4,FMO5,GSTA1,GSTA2,GSTA3,GSTA4,GSTM1,GSTM2,GSTM3,GSTM4,GSTP1,GSTZ1,HS2ST1,HS3ST6,HS6ST1,HS6ST2,HSP90AA1,MAPK1,MAPK3,MGST1,MGST3,PPARGC1A,PPM1L,PPP2R1A,PPP2R2B,PPP2R3A,PPP2R3B,PRKCA,PRKCG,PRKCH,PRKD1,RACK1,RXRA,SU…
Xenobiotic Metabolism PXR Signaling Pathway	3.6	Down	ABCC2,ALDH16A1,ALDH18A1,ALDH1A1,ALDH1A2,ALDH1A3,ALDH1B1,ALDH1L1,ALDH2,ALDH3A1,ALDH3A2,ALDH3B1,ALDH4A1,ALDH5A1,ALDH7A1,ALDH9A1,CAT,CDK5,CES1,CES3,CES4A,CHST1,CHST10,CHST12,CHST13,CHST7,CYP2C8,GSTA1,GSTA2,GSTA3,GSTA4,GSTM1,GSTM2,GSTM3,GSTM4,GSTP1,GSTZ1,HS2ST1,HS3ST6,HS6ST1,HS6ST2,HSP90AA1,MGST1,MGST3,NR1I2,PPARGC1A,PPP1R14C,PPP1R3C,PPP1R7,PRKACA,PRKACB,PRKAR1A,PRKAR2A,PRKCA,PRKCG,PRKCH,PRKD1,RXRA,S…
Oxidative Phosphorylation	3.48	Down	ATP5F1A,ATP5F1B,ATP5MC1,ATP5MC2,ATP5ME,ATP5MG,ATP5PB,ATP5PF,COX11,COX4I1,COX6A1,COX6C,COX7A1,COX7A2L,COX7C,CYB5A,DMAC2L,NDUFA1,NDUFA10,NDUFA11,NDUFA2,NDUFA3,NDUFA8,NDUFAB1,NDUFB1,NDUFB10,NDUFB5,NDUFB6,NDUFB8,NDUFS1,NDUFS5,NDUFS6,NDUFS8,NDUFV1,NDUFV3,SDHC,SURF1,UQCR11,UQCRB,UQCRC1,UQCRH,UQCRQ
Pyrimidine Ribonucleotides De Novo Biosynthesis	3.48	Down	AK1,AK4,AK7,AK8,AK9,CAD,CTPS2,DHODH,DHX9,ENTPD3,ENTPD4,NME1,NME2,NME3,NME4,NME5,NME7,NTPCR,NUDT15,NUDT5,SLC25A42
Xenobiotic Metabolism AHR Signaling Pathway	3.05	Down	ALDH16A1,ALDH18A1,ALDH1A1,ALDH1A2,ALDH1A3,ALDH1B1,ALDH1L1,ALDH2,ALDH3A1,ALDH3A2,ALDH3B1,ALDH4A1,ALDH5A1,ALDH7A1,ALDH9A1,CYP1A1,GSTA1,GSTA2,GSTA3,GSTA4,GSTM1,GSTM2,GSTM3,GSTM4,GSTP1,GSTZ1,HDAC4,HDAC5,HSP90AA1,MGST1,MGST3,NQO1,PTGES3,UGT1A6
Xenobiotic Metabolism Signaling	3.05	Down	ABCC2,ALDH16A1,ALDH18A1,ALDH1A1,ALDH1A2,ALDH1A3,ALDH1B1,ALDH1L1,ALDH2,ALDH3A1,ALDH3A2,ALDH3B1,ALDH4A1,ALDH5A1,ALDH7A1,ALDH9A1,CAMK1,CAMK1D,CAMK4,CAT,CES1,CES3,CES4A,CHST1,CHST10,CHST12,CHST13,CHST7,CUL3,CYP1A1,CYP2C8,FMO3,FMO4,FMO5,FTL,GCLC,GSTA1,GSTA2,GSTA3,GSTA4,GSTM1,GSTM2,GSTM3,GSTM4,GSTP1,GSTZ1,HDAC4,HDAC5,HS2ST1,HS3ST6,HS6ST1,HS6ST2,HSP90AA1,MAP3K12,MAP3K3,MAP3K9,MAPK1,MAPK14,MAPK3,MAPK9,MG…
Pyrimidine Ribonucleotides Interconversion	2.95	Down	AK1,AK4,AK7,AK8,AK9,CTPS2,DHX9,ENTPD3,ENTPD4,NME1,NME2,NME3,NME4,NME5,NME7,NTPCR,NUDT15,NUDT5,SLC25A42
Aryl Hydrocarbon Receptor Signaling	2.7	Down	ALDH16A1,ALDH18A1,ALDH1A1,ALDH1A2,ALDH1A3,ALDH1B1,ALDH1L1,ALDH2,ALDH3A1,ALDH3A2,ALDH3B1,ALDH4A1,ALDH5A1,ALDH7A1,ALDH9A1,ATM,ATR,BAX,CCNE1,CDK4,CYP1A1,CYP2C8,DHFR,E2F1,GSTA1,GSTA2,GSTA3,GSTA4,GSTM1,GSTM2,GSTM3,GSTM4,GSTP1,GSTZ1,HSP90AA1,HSPB1,MAPK1,MAPK3,MCM7,MGST1,MGST3,NFIA,NFIB,NQO1,PTGES3,RARB,RBL2,RXRA,SLC35A2,SMARCA4,TFDP1,TP73
LPS/IL-1 Mediated Inhibition of RXR Function	2.64	Down	ABCC2,ABCC4,ACOX1,ACSBG1,ACSF2,ALDH16A1,ALDH18A1,ALDH1A1,ALDH1A2,ALDH1A3,ALDH1B1,ALDH1L1,ALDH2,ALDH3A1,ALDH3A2,ALDH3B1,ALDH4A1,ALDH5A1,ALDH7A1,ALDH9A1,CAT,CD14,CHST1,CHST10,CHST12,CHST13,CHST7,CPT1A,CPT1C,CPT2,CRAT,CYP2A6 (includes others),CYP2C8,CYP2R1,CYP2U1,FABP5,FABP6,FMO3,FMO4,FMO5,GSTA1,GSTA2,GSTA3,GSTA4,GSTM1,GSTM2,GSTM3,GSTM4,GSTP1,GSTZ1,HS2ST1,HS3ST6,HS6ST1,HS6ST2,IL18,IL1RAPL2,MAPK9,MGM…
Noradrenaline and Adrenaline Degradation	2.64	Down	ADH1C,ADH6,ADH7,ADHFE1,AKR1A1,ALDH1A1,ALDH1A2,ALDH1A3,ALDH1B1,ALDH2,ALDH3A1,ALDH3A2,ALDH3B1,ALDH4A1,ALDH7A1,ALDH9A1,DHRS4,LRTOMT
Sonic Hedgehog Signaling	2.64	Down	ARRB2,CCNB1,CCNB2,CDK1,DYRK1B,PRKACA,PRKACB,PRKAR1A,PRKAR2A,PTCH1,PTCH2,SHH,SMO,STK36,SUFU,ZNF875
Fatty Acid Œ±-oxidation	2.28	Down	ALDH1A1,ALDH1A2,ALDH1A3,ALDH1B1,ALDH2,ALDH3A1,ALDH3A2,ALDH3B1,ALDH4A1,ALDH7A1,ALDH9A1,BCO2
Salvage Pathways of Pyrimidine Ribonucleotides	2.16	Down	AK1,AK4,AK7,AK8,AK9,CDA,CDADC1,CDK1,CDK4,CDK5,CDK7,DAPK1,GRK4,HIPK1,LIMK1,LIMK2,MAK,MAP3K9,MAPK1,MAPK3,MAPK9,NME1,NME2,NME3,NME4,NME5,NME7,PAK3,PKN1,PRKAA2,PRKCH,PRKX,PYCR3,UPRT
Putrescine Degradation III	2.07	Down	ALDH1A1,ALDH1A2,ALDH1A3,ALDH1B1,ALDH2,ALDH3A1,ALDH3A2,ALDH3B1,ALDH4A1,ALDH7A1,ALDH9A1,SAT2
NER (Nucleotide Excision Repair, Enhanced Pathway)	1.91	Down	CCNH,CDK7,CETN2,COPS3,COPS8,DDB1,DDB2,DNA2,ERCC1,ERCC3,GPS1,GTF2H2,GTF2H5,H3-3A/H3-3B,H4C2,LIG1,MNAT1,POLD1,POLD2,POLE3,POLE4,POLR2B,POLR2D,POLR2E,POLR2I,POLR2J,POLR2L,RFC4,RPA1,RPA3,SLC19A1,TOP2A,TOP2B,USP7,XRCC1
Serotonin Degradation	1.82	Down	ADH1C,ADH6,ADH7,ADHFE1,AKR1A1,ALDH1A1,ALDH1A2,ALDH1A3,ALDH1B1,ALDH2,ALDH3A1,ALDH3A2,ALDH3B1,ALDH4A1,ALDH7A1,ALDH9A1,B3GAT3,B4GAT1,CSGALNACT1,DHRS4,LARGE2,SULT1A1,SULT1B1,UGT1A6,UGT2A1,UGT2B4
Tryptophan Degradation X (Mammalian, via Tryptamine)	1.73	Down	AKR1A1,AKR1B10,ALDH1A1,ALDH1A2,ALDH1A3,ALDH1B1,ALDH2,ALDH3A1,ALDH3A2,ALDH3B1,ALDH4A1,ALDH7A1,ALDH9A1
Aldosterone Signaling in Epithelial Cells	1.73	Down	ABCB8,AHCY,ASIC1,DNAJB13,DNAJB2,DNAJB5,DNAJC10,DNAJC12,DNAJC16,DNAJC18,DNAJC22,DNAJC27,DNAJC4,DNAJC5B,HSP90AA1,HSPA12A,HSPA1L,HSPA2,HSPA4,HSPA4L,HSPB1,HSPB11,HSPD1,HSPE1,HSPH1,ICMT,ITPR1,KCNMB4,LRRC55,MAPK1,MAPK3,NOTUM,PI4KA,PIK3CD,PIP5K1B,PIP5KL1,PLCB2,PLCB4,PLCD4,PLCE1,PLCH1,PRKCA,PRKCG,PRKCH,PRKD1,SACS,SCNN1B,SCNN1G,SLC12A2,SMO,TRAP1
Ketolysis	1.73	Down	ACAA2,ACAT1,BDH1,BDH2,HADHA,HADHB,OXCT1
Histamine Degradation	1.73	Down	ALDH1A1,ALDH1A2,ALDH1A3,ALDH1B1,ALDH2,ALDH3A1,ALDH3A2,ALDH3B1,ALDH4A1,ALDH7A1,ALDH9A1
Cyclins and Cell Cycle Regulation	1.64	Down	ATM,ATR,CCNB1,CCNB2,CCNE1,CCNH,CDC25A,CDK1,CDK4,CDK7,CDKN2C,CUL1,E2F1,HDAC2,HDAC3,HDAC4,HDAC5,HDAC8,PA2G4,PPM1L,PPP2R1A,PPP2R2B,PPP2R3A,PPP2R3B,RBL2,SKP1,SKP2,TFDP1,WEE1
Cell Cycle Control of Chromosomal Replication	1.56	Down	CDC45,CDC7,CDK1,CDK10,CDK19,CDK20,CDK4,CDK5,CDK7,DNA2,LIG1,MCM2,MCM3,MCM4,MCM6,MCM7,POLD1,RPA1,RPA3,TOP2A,TOP2B
Purine Nucleotides Degradation II (Aerobic)	1.56	Down	ACP3,ADA,ADA2,ADARB2,GDA,IMPDH1,IMPDH2,NT5C,NT5C3B,PNP
Nucleotide Excision Repair Pathway	1.56	Down	CCNH,CDK7,ERCC1,ERCC3,GTF2H2,GTF2H5,MNAT1,POLR2B,POLR2D,POLR2E,POLR2I,POLR2J,POLR2L,RPA1,RPA3
Granzyme A Signaling	1.56	Down	APEX1,F2R,H1-5,HMGB2,NDUFA1,NDUFA10,NDUFA11,NDUFA2,NDUFA3,NDUFA8,NDUFAB1,NDUFAF1,NDUFB1,NDUFB10,NDUFB5,NDUFB6,NDUFB8,NDUFS1,NDUFS5,NDUFS6,NDUFS8,NDUFV1,NDUFV3,NME1,PARP1,XRCC6
Dopamine Degradation	1.54	Down	ALDH1A1,ALDH1A2,ALDH1A3,ALDH1B1,ALDH2,ALDH3A1,ALDH3A2,ALDH3B1,ALDH4A1,ALDH7A1,ALDH9A1,LRTOMT,SULT1A1,SULT1B1
Purine Nucleotides De Novo Biosynthesis II	1.48	Down	ADSL,ADSS1,GMPS,IMPDH1,IMPDH2,PAICS,PFAS
Apelin Adipocyte Signaling Pathway	1.48	Down	ADCY3,ADCY9,CAT,GPX3,GPX4,GPX7,GSTA1,GSTM1,GSTM2,GSTP1,GSTZ1,MAPK1,MAPK10,MAPK14,MAPK15,MAPK3,MAPK9,MGST1,MGST3,NOX4,PLIN1,PPARGC1A,PRDX6,PRKAA2,PRKACA,PRKACB,PRKAR1A,PRKAR2A,RAC3,SOD1
ATM Signaling	1.48	Down	ATM,ATR,BLM,BRCA1,CBX1,CBX3,CBX5,CCNB1,CCNB2,CDC25A,CDK1,CREB3L4,H2AX,HERC2,MAPK10,MAPK14,MAPK9,MDC1,MRE11,PPM1L,PPP2R1A,PPP2R2B,PPP2R3A,PPP2R3B,SMC2,SMC3,TDP1,TP53BP1,TP73,TRIM28,USP7,ZNF420
Citrulline Biosynthesis	1.31	Down	ALDH18A1,ARG2,GLS,GLS2,LOC102724788/PRODH,OAT

## Sheet: Table S4
Table S4. RV-A16 upregulated and downregulated genes, effects of which were strongly attenuated by PI treatment (LFC>0.5, p adj<0.001)
Gene	Virus_vs_ctrl_LogFoldChange	Virus_vs_ctrl_p_val_adj	Virus_PI_vs_Virus_LogFoldChange	Virus_PI_vs_Virus_p_val_adj	Virus_PI_vs_ctrl_LogFoldChange	Virus_PI_vs_ctrl_p_val_adj	Virus_vs_ctrl_direction	VirPI_effect
ABAT	1.22344	1.56757e-13	-1.14797	9.26645e-12	0.0754646	0.634524	upregulated	significantly decreased viral effect
ABL2	0.588917	0.000424358	-0.480398	0.00561524	0.108519	0.567046	upregulated	significantly decreased viral effect
ACE2	1.96744	2.49522e-20	-0.865682	1.97566e-07	1.10176	1.59798e-10	upregulated	significantly decreased viral effect
ACHE	2.66847	5.30048e-16	-0.953553	0.00042605	1.71492	2.75495e-09	upregulated	significantly decreased viral effect
ACKR4	1.44685	1.10619e-07	-2.13988	9.26645e-12	-0.693026	0.00849318	upregulated	significantly decreased viral effect
ACOT7	0.770594	3.80733e-09	-0.460517	0.00024749	0.310078	0.0115606	upregulated	significantly decreased viral effect
ACP2	1.39973	1.8233e-20	-0.757746	8.91809e-10	0.641985	3.48572e-08	upregulated	significantly decreased viral effect
ACP5	1.03905	7.82727e-11	-0.290825	0.0490035	0.748225	7.00451e-07	upregulated	significantly decreased viral effect
ACSL1	1.50841	8.22449e-17	-0.398965	0.0058707	1.10945	1.09507e-11	upregulated	significantly decreased viral effect
ACSL5	1.19587	3.16224e-14	-0.393607	0.00328437	0.802265	1.54665e-08	upregulated	significantly decreased viral effect
ACTBL2	0.951557	1.80498e-05	-1.10859	2.46689e-06	-0.157036	0.520745	upregulated	significantly decreased viral effect
ADAM17	0.6514	1.59656e-13	-0.396198	7.66361e-07	0.255202	0.000725151	upregulated	significantly decreased viral effect
ADAM28	2.02464	6.66145e-22	-0.906529	2.01191e-08	1.11811	2.07555e-11	upregulated	significantly decreased viral effect
ADAM8	1.30292	3.13591e-14	-1.02005	5.1162e-10	0.282876	0.0517927	upregulated	significantly decreased viral effect
ADAMDEC1	1.11617	3.83785e-05	-0.654358	0.0184783	0.461808	0.0981834	upregulated	significantly decreased viral effect
ADAMTS6	1.10057	1.66762e-05	-1.42953	2.29209e-07	-0.328957	0.218227	upregulated	significantly decreased viral effect
ADAMTSL3	2.62784	1.00187e-21	-1.58218	6.47949e-12	1.04566	2.36647e-07	upregulated	significantly decreased viral effect
ADAMTSL5	0.626587	2.83495e-09	-0.248746	0.0128852	0.377842	0.00014979	upregulated	significantly decreased viral effect
ADAR	1.99203	2.28597e-30	-0.70522	3.3405e-10	1.28681	1.80873e-20	upregulated	significantly decreased viral effect
ADCY4	1.68113	4.33194e-11	-0.847949	0.000304302	0.833184	0.000311288	upregulated	significantly decreased viral effect
ADCY7	1.0725	1.78267e-06	-0.968381	2.59476e-05	0.10412	0.680272	upregulated	significantly decreased viral effect
ADGRE5	0.605399	1.53919e-08	-0.496582	3.43596e-06	0.108817	0.310161	upregulated	significantly decreased viral effect
ADM	1.75014	3.51838e-23	-0.587667	2.93429e-06	1.16247	3.25436e-15	upregulated	significantly decreased viral effect
ADM2	1.35295	1.48449e-09	-1.17282	1.75583e-07	0.18013	0.420645	upregulated	significantly decreased viral effect
ADPRH	0.500178	0.000291201	-0.528869	0.000255789	-0.0286911	0.86643	upregulated	significantly decreased viral effect
ADPRHL2	1.00008	3.51063e-16	-0.500228	1.52851e-06	0.499848	1.01233e-06	upregulated	significantly decreased viral effect
ADPRM	0.534648	9.47669e-06	-0.482785	0.00010336	0.0518627	0.707128	upregulated	significantly decreased viral effect
ADRB2	1.30796	4.71296e-16	-0.369843	0.00480675	0.938117	9.99163e-11	upregulated	significantly decreased viral effect
AGBL1-AS1	0.960681	2.55181e-05	-0.991574	3.17611e-05	-0.0308935	0.912034	upregulated	significantly decreased viral effect
AGK	0.60155	2.0505e-11	-0.41565	1.05968e-06	0.1859	0.0209729	upregulated	significantly decreased viral effect
AGRN	1.06189	6.89497e-20	-0.589566	9.98407e-10	0.472322	1.52374e-07	upregulated	significantly decreased viral effect
AIDA	0.847929	3.73386e-12	-0.620189	9.60069e-08	0.22774	0.035187	upregulated	significantly decreased viral effect
AIM2	5.31401	1.29012e-30	-2.41615	1.25434e-13	2.89786	1.47091e-17	upregulated	significantly decreased viral effect
AKAP17A	0.583612	3.71984e-12	-0.168069	0.0250396	0.415542	1.04754e-07	upregulated	significantly decreased viral effect
AKAP2	1.72711	5.75047e-11	-1.07548	1.42871e-05	0.651625	0.00614758	upregulated	significantly decreased viral effect
AKAP5	1.16513	5.24062e-07	-0.691151	0.00269644	0.473982	0.0386175	upregulated	significantly decreased viral effect
AKAP7	2.23869	1.45052e-14	-1.23733	1.41213e-06	1.00136	4.70895e-05	upregulated	significantly decreased viral effect
AKIP1	0.663936	6.11717e-11	-0.43359	6.26105e-06	0.230346	0.0120328	upregulated	significantly decreased viral effect
AKIRIN2	0.677563	9.49686e-17	-0.336326	9.17678e-07	0.341237	4.31417e-07	upregulated	significantly decreased viral effect
ALDH1L2	1.29498	0.000128178	-1.39452	8.55571e-05	-0.0995375	0.807824	upregulated	significantly decreased viral effect
ALG1L	0.588009	2.81294e-05	-0.284279	0.0494179	0.30373	0.0332123	upregulated	significantly decreased viral effect
ALMS1P1	1.69755	3.34017e-09	-1.67444	1.5896e-08	0.0231097	0.945307	upregulated	significantly decreased viral effect
ALPK1	0.795814	3.02371e-11	-0.393355	0.000341548	0.402459	0.00020324	upregulated	significantly decreased viral effect
AMBRA1	0.711555	3.68784e-15	-0.435654	6.75046e-08	0.2759	0.000226894	upregulated	significantly decreased viral effect
AMER1	1.39481	7.48783e-17	-0.73705	2.11924e-07	0.65776	1.52866e-06	upregulated	significantly decreased viral effect
AMOTL2	0.900739	4.64311e-14	-0.566468	1.76044e-07	0.334272	0.00090895	upregulated	significantly decreased viral effect
ANGPT1	0.859743	0.000549751	-0.969364	0.000212856	-0.10962	0.707223	upregulated	significantly decreased viral effect
ANGPTL1	3.1266	1.4778e-19	-1.52198	4.70934e-08	1.60462	6.27477e-09	upregulated	significantly decreased viral effect
ANGPTL6	1.30908	4.65658e-09	-0.587746	0.0057199	0.721335	0.000622745	upregulated	significantly decreased viral effect
ANKDD1A	1.04379	1.90459e-11	-0.359302	0.0106829	0.684492	1.9333e-06	upregulated	significantly decreased viral effect
ANKFY1	1.39129	1.03666e-23	-0.71974	3.34675e-11	0.671548	9.22775e-11	upregulated	significantly decreased viral effect
ANKIB1	1.0051	2.63213e-09	-0.611122	0.000163306	0.393976	0.0126815	upregulated	significantly decreased viral effect
ANO1	1.03196	2.42083e-05	-0.712419	0.00427125	0.319545	0.211742	upregulated	significantly decreased viral effect
ANO7L1	2.59229	4.01148e-22	-1.65633	5.52132e-13	0.935961	1.27212e-06	upregulated	significantly decreased viral effect
ANXA10	2.89078	1.68883e-18	-1.0746	3.3115e-05	1.81617	8.83641e-11	upregulated	significantly decreased viral effect
AP1M1	0.503072	1.09029e-08	-0.645294	3.91285e-11	-0.142222	0.0940745	upregulated	significantly decreased viral effect
AP5B1	0.956811	4.00054e-18	-0.621852	1.66136e-10	0.334959	8.74854e-05	upregulated	significantly decreased viral effect
APBB2	0.671172	2.12051e-07	-0.637395	1.63862e-06	0.0337776	0.821335	upregulated	significantly decreased viral effect
APOBEC3A	5.80548	2.34462e-24	-2.54948	1.44668e-09	3.256	2.01789e-13	upregulated	significantly decreased viral effect
APOBEC3B	1.02617	7.52637e-10	-0.765039	2.51887e-06	0.26113	0.0964652	upregulated	significantly decreased viral effect
APOBEC3C	0.795982	3.2682e-09	-0.530098	4.76937e-05	0.265885	0.0363339	upregulated	significantly decreased viral effect
APOBEC3D	1.7358	2.82557e-19	-1.27048	7.45297e-13	0.465325	0.00124985	upregulated	significantly decreased viral effect
APOBEC3F	1.6858	1.25131e-15	-1.22914	3.49552e-10	0.456657	0.00760968	upregulated	significantly decreased viral effect
APOBEC3G	2.71372	1.03481e-23	-1.59491	7.04654e-13	1.11881	8.83056e-09	upregulated	significantly decreased viral effect
APOD	1.35198	5.07547e-12	-0.627777	0.0003736	0.7242	3.75641e-05	upregulated	significantly decreased viral effect
APOL1	2.49654	2.80697e-32	-0.998632	7.04654e-13	1.49791	1.13109e-20	upregulated	significantly decreased viral effect
APOL2	2.56979	5.53501e-28	-1.22679	9.70712e-13	1.34299	6.52155e-15	upregulated	significantly decreased viral effect
APOL3	2.55131	6.68041e-21	-1.66439	1.90193e-12	0.886912	8.67833e-06	upregulated	significantly decreased viral effect
APOL4	3.65959	5.50066e-22	-2.08666	2.25114e-11	1.57293	2.65927e-08	upregulated	significantly decreased viral effect
APOL6	2.48517	6.22609e-28	-1.16084	2.04904e-12	1.32433	3.37887e-15	upregulated	significantly decreased viral effect
ARAP2	1.20332	1.72202e-14	-0.555182	4.11614e-05	0.648135	1.73104e-06	upregulated	significantly decreased viral effect
AREG	1.13972	4.80113e-05	-0.627023	0.0297554	0.512698	0.075209	upregulated	significantly decreased viral effect
ARHGAP15	0.985278	5.05418e-06	-0.436267	0.0469908	0.54901	0.0107111	upregulated	significantly decreased viral effect
ARHGAP17	0.849047	5.57707e-16	-0.586015	9.02656e-10	0.263032	0.0018498	upregulated	significantly decreased viral effect
ARHGAP20	0.919136	2.36117e-05	-0.593343	0.00744904	0.325793	0.148565	upregulated	significantly decreased viral effect
ARHGAP26	0.576115	1.05226e-05	-0.30373	0.0222669	0.272385	0.0391684	upregulated	significantly decreased viral effect
ARHGAP27	0.971847	2.71685e-18	-0.500047	6.20117e-08	0.4718	1.42558e-07	upregulated	significantly decreased viral effect
ARHGEF2	0.697427	1.21198e-12	-0.516438	3.27298e-08	0.18099	0.0353712	upregulated	significantly decreased viral effect
ARHGEF37	0.629318	3.93978e-09	-0.591535	6.05018e-08	0.0377837	0.745118	upregulated	significantly decreased viral effect
ARHGEF5	0.501872	8.26926e-09	-0.328875	0.000103425	0.172997	0.0370589	upregulated	significantly decreased viral effect
ARID5A	1.04783	1.2973e-10	-1.04669	5.68483e-10	0.00114022	0.994859	upregulated	significantly decreased viral effect
ARL14	2.29018	4.63183e-20	-1.16	9.10519e-09	1.13018	8.89562e-09	upregulated	significantly decreased viral effect
ARL5B	1.28635	4.77761e-09	-0.716219	0.000669325	0.570128	0.00576172	upregulated	significantly decreased viral effect
ARL6IP6	0.540076	1.67182e-07	-0.44575	1.83743e-05	0.0943258	0.376626	upregulated	significantly decreased viral effect
ARMC8	0.5285	3.65183e-13	-0.319415	1.40921e-06	0.209085	0.000844304	upregulated	significantly decreased viral effect
ARMCX1	0.995821	1.80403e-09	-0.900076	7.74802e-08	0.0957444	0.575669	upregulated	significantly decreased viral effect
ARRDC3	1.15172	1.55344e-12	-0.391976	0.00642248	0.759746	3.39744e-07	upregulated	significantly decreased viral effect
ARSA	0.527944	2.06391e-11	-0.149449	0.0372433	0.378495	3.05906e-07	upregulated	significantly decreased viral effect
ASAH2	0.805754	1.44043e-06	-0.594507	0.000415991	0.211247	0.218227	upregulated	significantly decreased viral effect
ASAH2B	0.82804	3.6992e-13	-0.549733	1.92303e-07	0.278307	0.00447834	upregulated	significantly decreased viral effect
ASCL2	1.64931	1.05297e-11	-0.919616	3.74777e-05	0.729691	0.000731604	upregulated	significantly decreased viral effect
ASPHD2	0.911404	2.05111e-08	-0.718935	8.76376e-06	0.192469	0.232829	upregulated	significantly decreased viral effect
ASS1	0.627022	2.84087e-13	-0.245909	0.00102805	0.381113	7.00451e-07	upregulated	significantly decreased viral effect
ATAD2B	0.564376	9.42979e-06	-0.289021	0.0256202	0.275355	0.0319992	upregulated	significantly decreased viral effect
ATF3	1.31372	7.1901e-11	-1.60667	7.73022e-13	-0.292951	0.116345	upregulated	significantly decreased viral effect
ATF4	0.706923	6.30741e-13	-0.27046	0.00170276	0.436464	8.06167e-07	upregulated	significantly decreased viral effect
ATF5	1.27192	1.33859e-15	-0.54081	5.25934e-05	0.73111	9.40639e-08	upregulated	significantly decreased viral effect
ATG7	0.526142	3.69559e-14	-0.279363	5.05775e-06	0.246779	3.28977e-05	upregulated	significantly decreased viral effect
ATP10A	2.89242	1.45397e-15	-1.76555	4.16048e-08	1.12687	0.00015298	upregulated	significantly decreased viral effect
ATP13A1	0.564495	3.61948e-15	-0.432197	1.85535e-10	0.132299	0.0254112	upregulated	significantly decreased viral effect
ATP13A4	0.845452	8.65089e-09	-0.410392	0.00352413	0.435059	0.00173917	upregulated	significantly decreased viral effect
ATP1B1	0.787604	4.17209e-12	-0.422979	4.36557e-05	0.364626	0.00029339	upregulated	significantly decreased viral effect
ATXN1L	0.618533	7.8553e-10	-0.446573	4.80127e-06	0.171959	0.0684402	upregulated	significantly decreased viral effect
ATXN7.1	0.994381	9.46098e-14	-0.479823	4.23647e-05	0.514558	9.26911e-06	upregulated	significantly decreased viral effect
ATXN7L1	0.509474	1.2772e-06	-0.399686	0.000172085	0.109788	0.316027	upregulated	significantly decreased viral effect
AVIL	0.589656	4.4203e-06	-0.394758	0.00231293	0.194898	0.137921	upregulated	significantly decreased viral effect
AXL	0.699654	2.74386e-11	-0.274006	0.00407237	0.425648	1.02126e-05	upregulated	significantly decreased viral effect
AZI2	0.789733	2.88317e-14	-0.597221	1.20978e-09	0.192512	0.0279173	upregulated	significantly decreased viral effect
B2M	1.86033	1.2102e-24	-0.731711	1.85645e-08	1.12862	7.14872e-15	upregulated	significantly decreased viral effect
B3GALNT1	1.09168	1.32028e-14	-0.626032	6.26544e-07	0.465647	9.35739e-05	upregulated	significantly decreased viral effect
B3GNT7	0.802659	2.14414e-12	-0.736682	1.64703e-10	0.0659767	0.549825	upregulated	significantly decreased viral effect
B3GNT8	0.851276	1.49606e-11	-0.304335	0.00750517	0.546941	2.49081e-06	upregulated	significantly decreased viral effect
B4GALT5	0.669902	2.29241e-10	-0.346762	0.000436504	0.32314	0.000840757	upregulated	significantly decreased viral effect
BACE2	0.513733	1.67969e-14	-0.148231	0.00871952	0.365502	1.94605e-09	upregulated	significantly decreased viral effect
BACH1	1.0155	5.55594e-07	-0.589076	0.00341086	0.426429	0.0330575	upregulated	significantly decreased viral effect
BACH2	0.595256	0.000393779	-0.746082	2.9176e-05	-0.150826	0.414702	upregulated	significantly decreased viral effect
BAG1	0.816562	6.70057e-10	-0.38832	0.00173859	0.428242	0.000485265	upregulated	significantly decreased viral effect
BAK1	1.61577	1.2516e-22	-0.854341	8.39069e-11	0.761434	9.032e-10	upregulated	significantly decreased viral effect
[truncated: 2,446 more rows]

## Sheet: Table S5
Table S5. Ingenuity canonical pathway analysis enrichments for RV-A16 upregulated and downregulated genes, which were strongly attenuated by PI treatment.
[truncated: 177 more rows]

[truncated: 1 more sheets: Table S6]
